# Supplementary material
Source: PubMed Central journal article supplement (PMC5914168)

## Supporting Information

### X-Ray Crystallographic Data and Modelling Figures/interaction maps

#### Table of Contents

|                                                                                         |           |
|-----------------------------------------------------------------------------------------|-----------|
| Gas phase modelling and tables                                                          | S2        |
| X-Ray structures and tables                                                             | S3-S4     |
| WaterMap analysis of <b>1</b> vs <b>13</b>                                              | S5        |
| Ligand interaction maps                                                                 | S6-S14    |
| LC-MS/HRMS compounds and <sup>1</sup> H and <sup>13</sup> C NMR spectra for <b>1-57</b> | S15-S146  |
| Table of Smiles and reference numbers                                                   | S147-S148 |
| IC <sub>50</sub> curves for GAK                                                         | S149-S160 |

**Figure S1.** Torsional Scanning of **1** and **13**

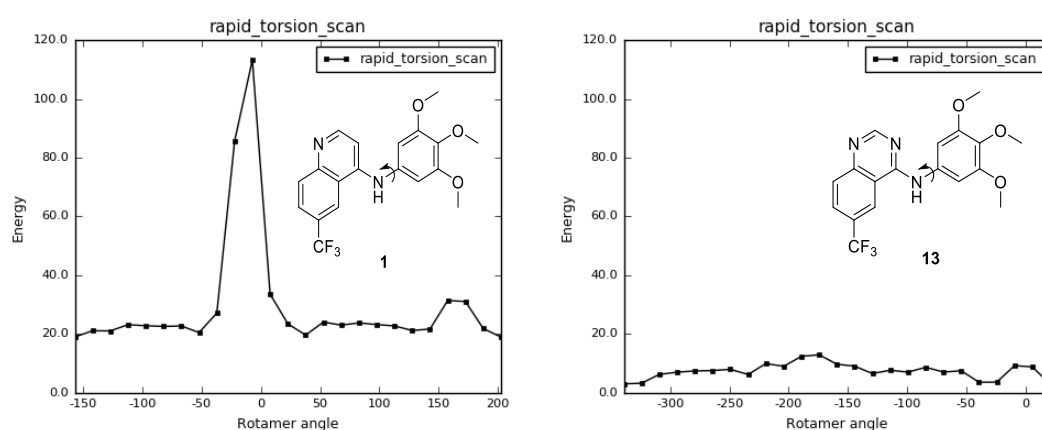

**Table S1.** Gas phase calculations of **1**, **13**, **9**, **49**, **48**, **17** and **37**.

| Compound | C-N-C angle | H-N-C-C torsion | Quin(az)oline-phenyl plane angle |
|----------|-------------|-----------------|----------------------------------|
| <b>1</b> | 128.54      | 149.21          | 57.24                            |

|           |        |        |       |
|-----------|--------|--------|-------|
| <b>13</b> | 131.02 | 177.95 | 3.56  |
| <b>9</b>  | 128.91 | 153.70 | 47.93 |
| <b>49</b> | 129.15 | 151.36 | 48.24 |
| <b>48</b> | 128.95 | 152.77 | 48.83 |
| <b>17</b> | 129.35 | 159.98 | 44.68 |
| <b>37</b> | 129.96 | 158.63 | 42.20 |

**Figure S2.** Crystal structures of **1**, **13**, **9**, **49**, **48**, **17** and **37** (all ADP ellipsoids are shown at 50% probability)

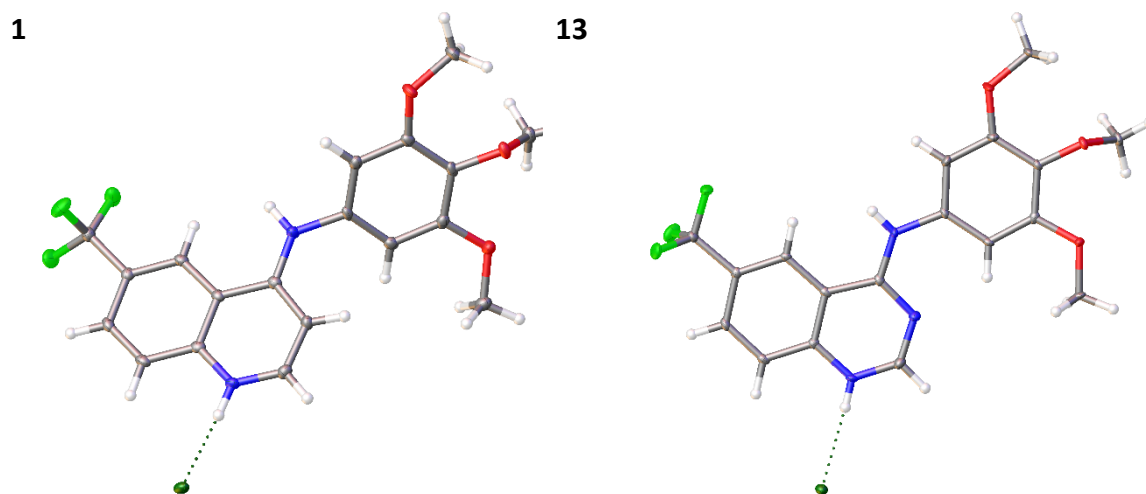

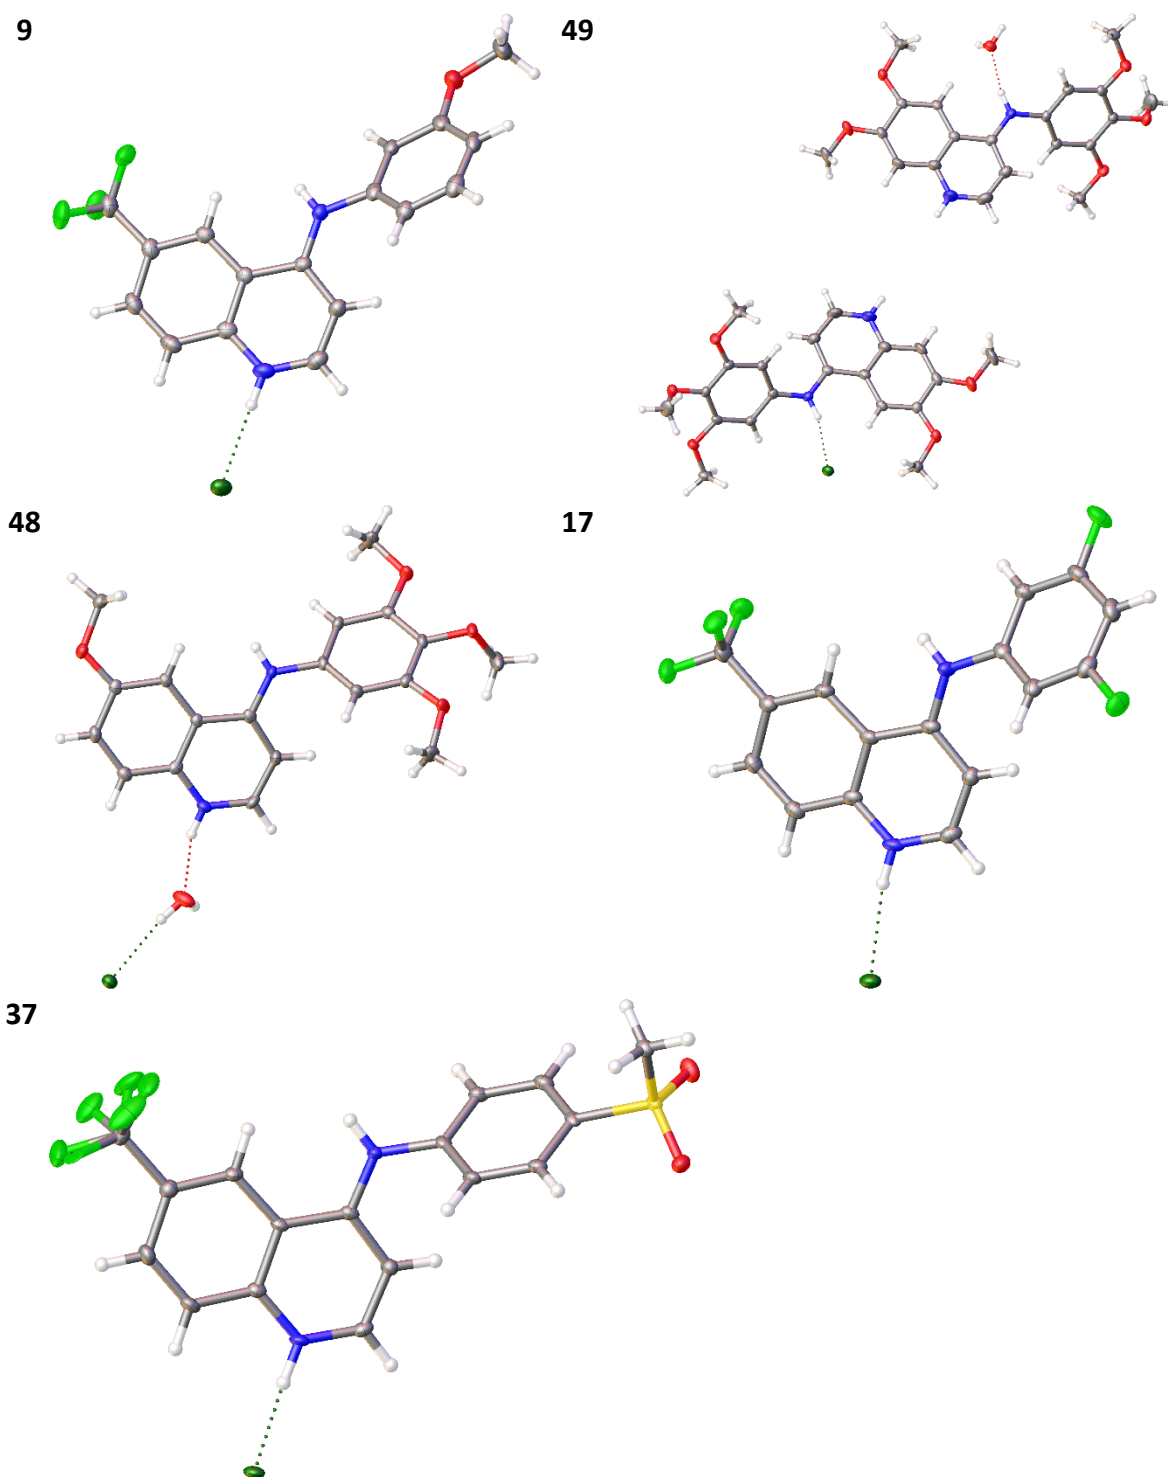

**Table S2.** Crystal structure data of **1**, **13**, **9**, **49**, **48**, **17** and **37**.

| Compound reference | <b>1</b> HCl                                                                   | <b>13</b> HCl                                                                  | <b>9</b> HCl                                                      | <b>49</b> HCl, H <sub>2</sub> O                                  | <b>48</b> HCl, H <sub>2</sub> O                                 | <b>17</b> HCl                                                   | <b>37</b> HCl                                                                    |
|--------------------|--------------------------------------------------------------------------------|--------------------------------------------------------------------------------|-------------------------------------------------------------------|------------------------------------------------------------------|-----------------------------------------------------------------|-----------------------------------------------------------------|----------------------------------------------------------------------------------|
| Chemical Formula   | C <sub>19</sub> H <sub>18</sub> ClF <sub>3</sub> N <sub>2</sub> O <sub>3</sub> | C <sub>18</sub> H <sub>17</sub> ClF <sub>3</sub> N <sub>3</sub> O <sub>3</sub> | C <sub>17</sub> H <sub>14</sub> ClF <sub>3</sub> N <sub>2</sub> O | C <sub>40</sub> H <sub>47</sub> ClN <sub>4</sub> O <sub>11</sub> | C <sub>19</sub> H <sub>23</sub> ClN <sub>2</sub> O <sub>5</sub> | C <sub>16</sub> H <sub>10</sub> ClF <sub>5</sub> N <sub>2</sub> | C <sub>17</sub> H <sub>14</sub> ClF <sub>3</sub> N <sub>2</sub> O <sub>2</sub> S |
| Formula Mass       | 414.80                                                                         | 415.79                                                                         | 354.75                                                            | 795.26                                                           | 394.84                                                          | 360.71                                                          | 402.81                                                                           |
| Crystal System     | monoclinic                                                                     | triclinic                                                                      | monoclinic                                                        | monoclinic                                                       | orthorhombic                                                    | monoclinic                                                      | triclinic                                                                        |
| <i>a</i> / Å       | 13.0547(4)                                                                     | 7.4430(4)                                                                      | 13.2992(6)                                                        | 8.15904(9)                                                       | 7.18960(10)                                                     | 11.5664(5)                                                      | 5.4737(2)                                                                        |
| <i>b</i> / Å       | 7.8338(2)                                                                      | 9.2967(5)                                                                      | 7.1675(3)                                                         | 21.9132(2)                                                       | 24.1253(4)                                                      | 9.5134(4)                                                       | 9.2142(3)                                                                        |
| <i>c</i> / Å       | 18.3234(5)                                                                     | 13.7306(6)                                                                     | 18.4659(11)                                                       | 22.8051(2)                                                       | 10.8297(2)                                                      | 13.5408(6)                                                      | 17.3243(7)                                                                       |
| $\alpha$ / °       | 90                                                                             | 102.723(4)                                                                     | 90                                                                | 90                                                               | 90                                                              | 90                                                              | 93.294(3)                                                                        |

|                                              |               |              |               |              |               |               |              |
|----------------------------------------------|---------------|--------------|---------------|--------------|---------------|---------------|--------------|
| $\beta/^\circ$                               | 105.902(3)    | 96.290(4)    | 102.609(5)    | 96.4217(10)  | 90            | 101.823(4)    | 93.001(3)    |
| $\gamma/^\circ$                              | 90            | 111.251(4)   | 90            | 90           | 90            | 90            | 103.802(3)   |
| Unit cell volume/ $\text{\AA}^3$             | 1802.18(9)    | 844.80(8)    | 1717.75(15)   | 4051.74(7)   | 1878.43(5)    | 1458.36(11)   | 845.16(5)    |
| Temperature/ K                               | 100(2)        | 100(2)       | 100(2)        | 100(2)       | 100(2)        | 100(2)        | 100(2)       |
| Space group                                  | $P2_1/c$ (14) | $P1$ (2)     | $P2_1/c$ (14) | $Ia$ (9)     | $Pna2_1$ (33) | $P2_1/c$ (14) | $P1$ (2)     |
| No. of formula units per unit cell, $Z$      | 4             | 2            | 4             | 4            | 4             | 4             | 2            |
| Radiation Type                               | MoK $\alpha$  | MoK $\alpha$ | MoK $\alpha$  | MoK $\alpha$ | MoK $\alpha$  | MoK $\alpha$  | MoK $\alpha$ |
| Absorption coefficient, $\mu/\text{mm}^{-1}$ | 0.266         | 0.286        | 0.258         | 0.158        | 0.237         | 0.320         | 0.0396       |
| No. of reflections measured                  | 16094         | 10579        | 14254         | 54602        | 17624         | 13590         | 13815        |
| No. of unique reflections                    | 4096          | 3847         | 3914          | 9216         | 4215          | 3343          | 3836         |
| No. of independent reflections, $R_{int}$    | 0.0344        | 0.0540       | 0.0678        | 0.0283       | 0.0375        | 0.0709        | 0.0474       |
| Final $R_1$ values ( $I > 2\sigma(I)$ )      | 0.0379        | 0.0444       | 0.0551        | 0.0327       | 0.0335        | 0.0487        | 0.0431       |
| Final $wR_2$ values ( $I > 2\sigma(I)$ )     | 0.0832        | 0.0912       | 0.1176        | 0.0870       | 0.0692        | 0.0849        | 0.1047       |
| Final $R_1$ values (all data)                | 0.0538        | 0.0780       | 0.0948        | 0.0357       | 0.0394        | 0.0858        | 0.0579       |
| Final $wR_2$ values (all data)               | 0.0891        | 0.1017       | 0.1310        | 0.0890       | 0.0722        | 0.0966        | 0.1118       |
| Goodness of fit on $F_2$                     | 1.035         | 1.016        | 1.037         | 1.044        | 1.044         | 1.026         | 1.045        |
| CCDC ID                                      | 1534017       | 1534019      | 1534018       | 1534023      | 1534022       | 1534020       | 1534021      |

**Table S3.** Crystal structure analysis of **1**, **13**, **9**, **49**, **48**, **17** and **37**.

| Compound  | C-N-C angle | H-N-C-C torsion | Quin(az)oline-phenyl plane angle | GAK $K_i$ ( $\mu\text{M}$ ) |
|-----------|-------------|-----------------|----------------------------------|-----------------------------|
| <b>1</b>  | 127.14      | 136.46          | 52.06                            | 0.0039                      |
| <b>13</b> | 129.51      | 168.74          | 2.65                             | 0.037                       |
| <b>9</b>  | 127.41      | 152.94          | 41.65                            | 0.0057                      |
| <b>49</b> | 126.13      | 137.89          | 48.74                            | 0.00054                     |
| <b>48</b> | 125.31      | 129.46          | 50.51                            | 0.013                       |
| <b>17</b> | 127.05      | 148.29          | 35.51                            | 0.051                       |
| <b>37</b> | 127.76      | 133.84          | 58.8                             | 0.97                        |

**Figure S3.** Watermap analysis of favourable docking poses showing that quinazoline ring system of **13** (left) leaves additional space to accommodation of water molecule (theoretical energy gain = 4.2 kcal/mol), whereas it is likely displaced by compound **1** (right) and other quinoline derivatives.

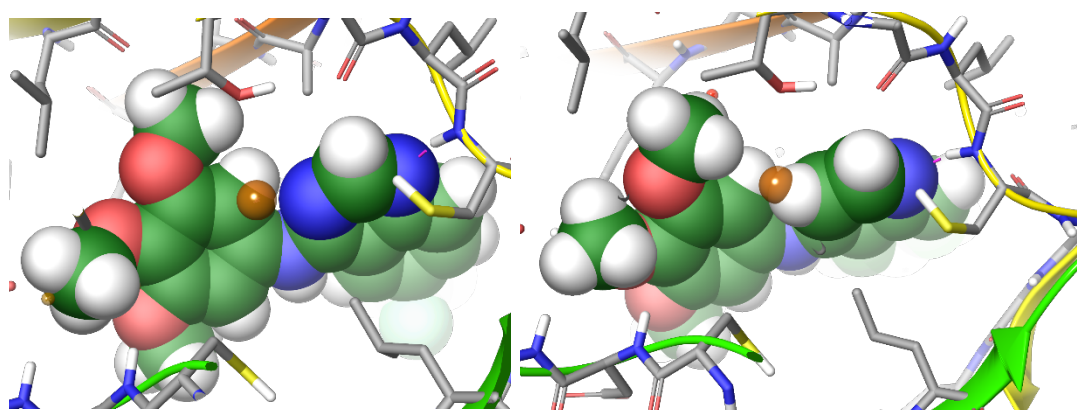

**Figure S4.** Ligand interaction diagrams in GAK active site. A - Compound **1**, B - Compound **8**, C - Compound **9**, D - Compound **13**, E - Compound **41**, F - Compound **49**.

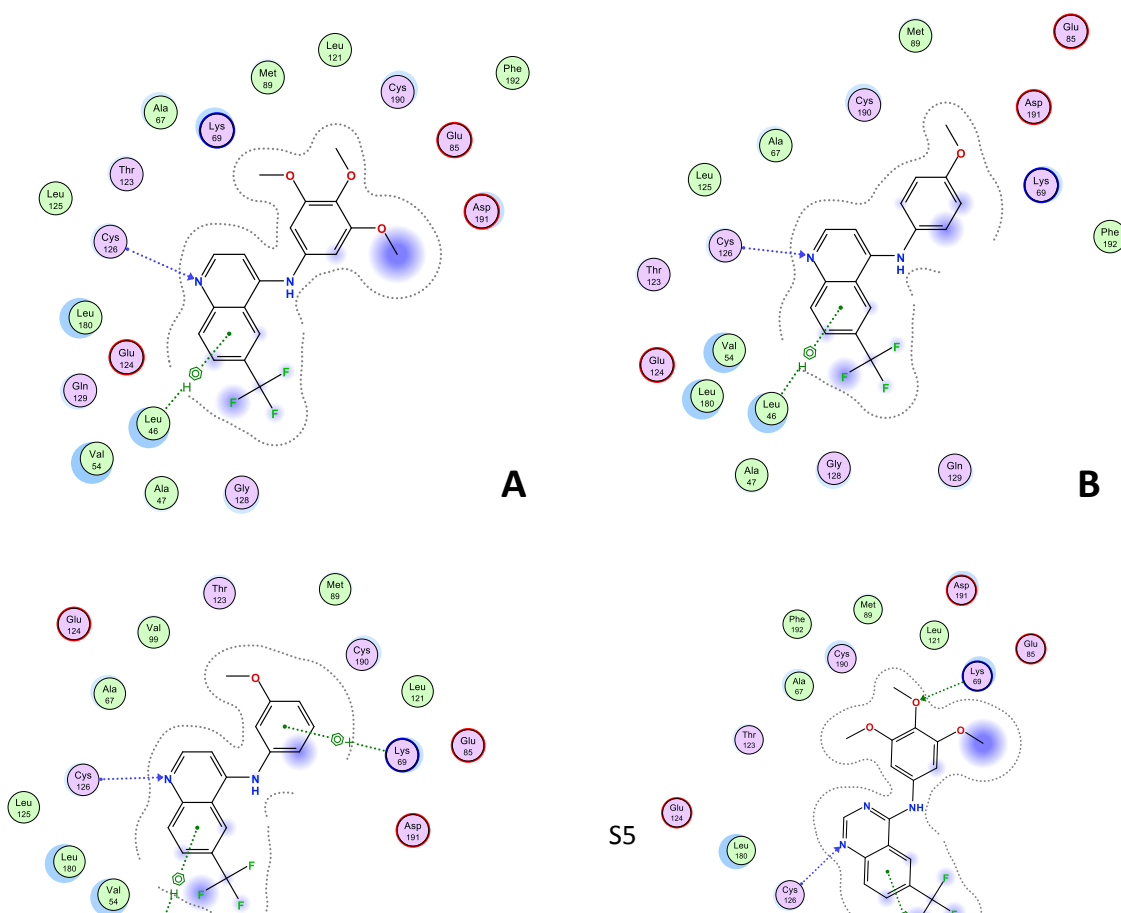

C

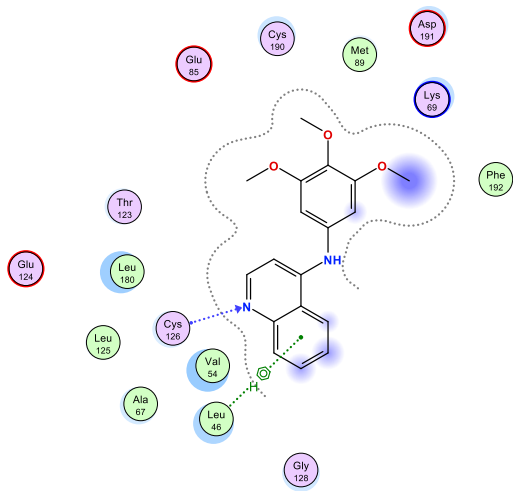

D

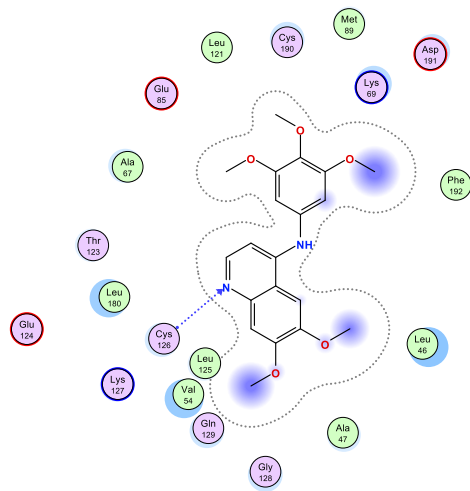

E

F

**Figure S5.** Ligand interaction diagrams in AAK1 active site. A - Compound **1**, B - Compound **8**, C - Compound **9**, D - Compound **13**, E - Compound **41**, F - Compound **49**.

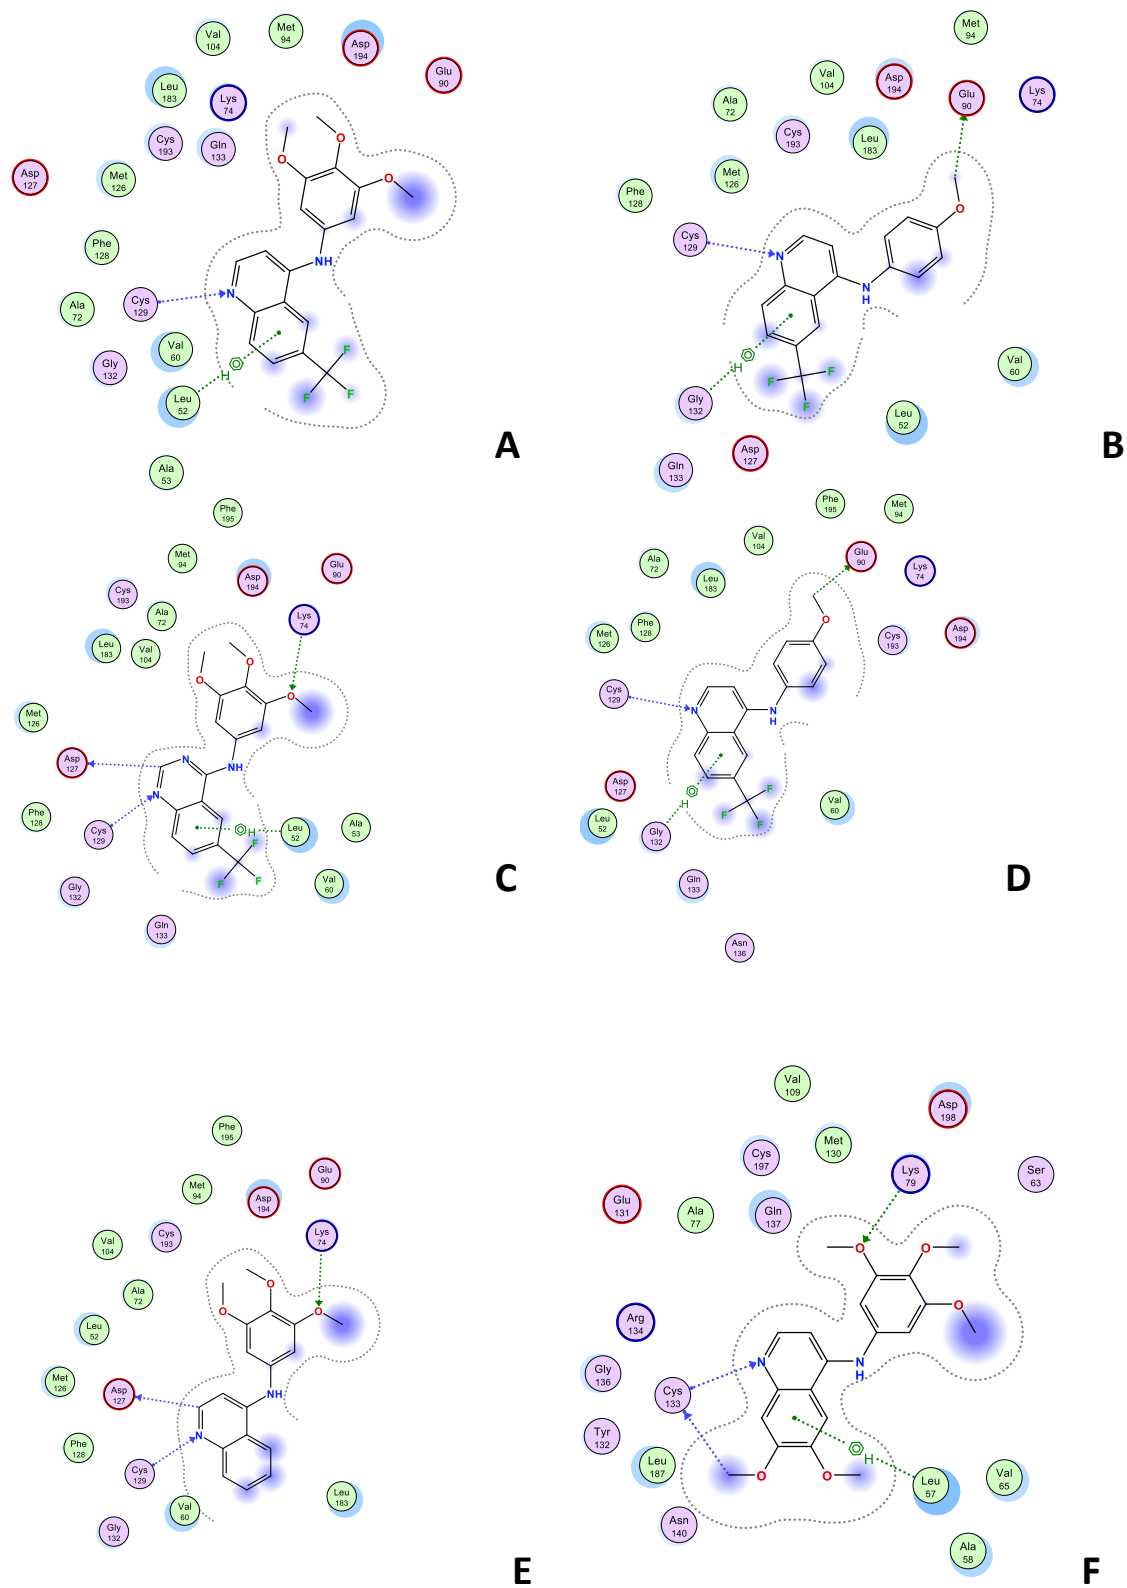

**Figure S6.** Ligand interaction diagrams in BMP2K active site. A - Compound **1**, B - Compound **8**, C - Compound **9**, D - Compound **13**, E - Compound **41**, F - Compound **49**.

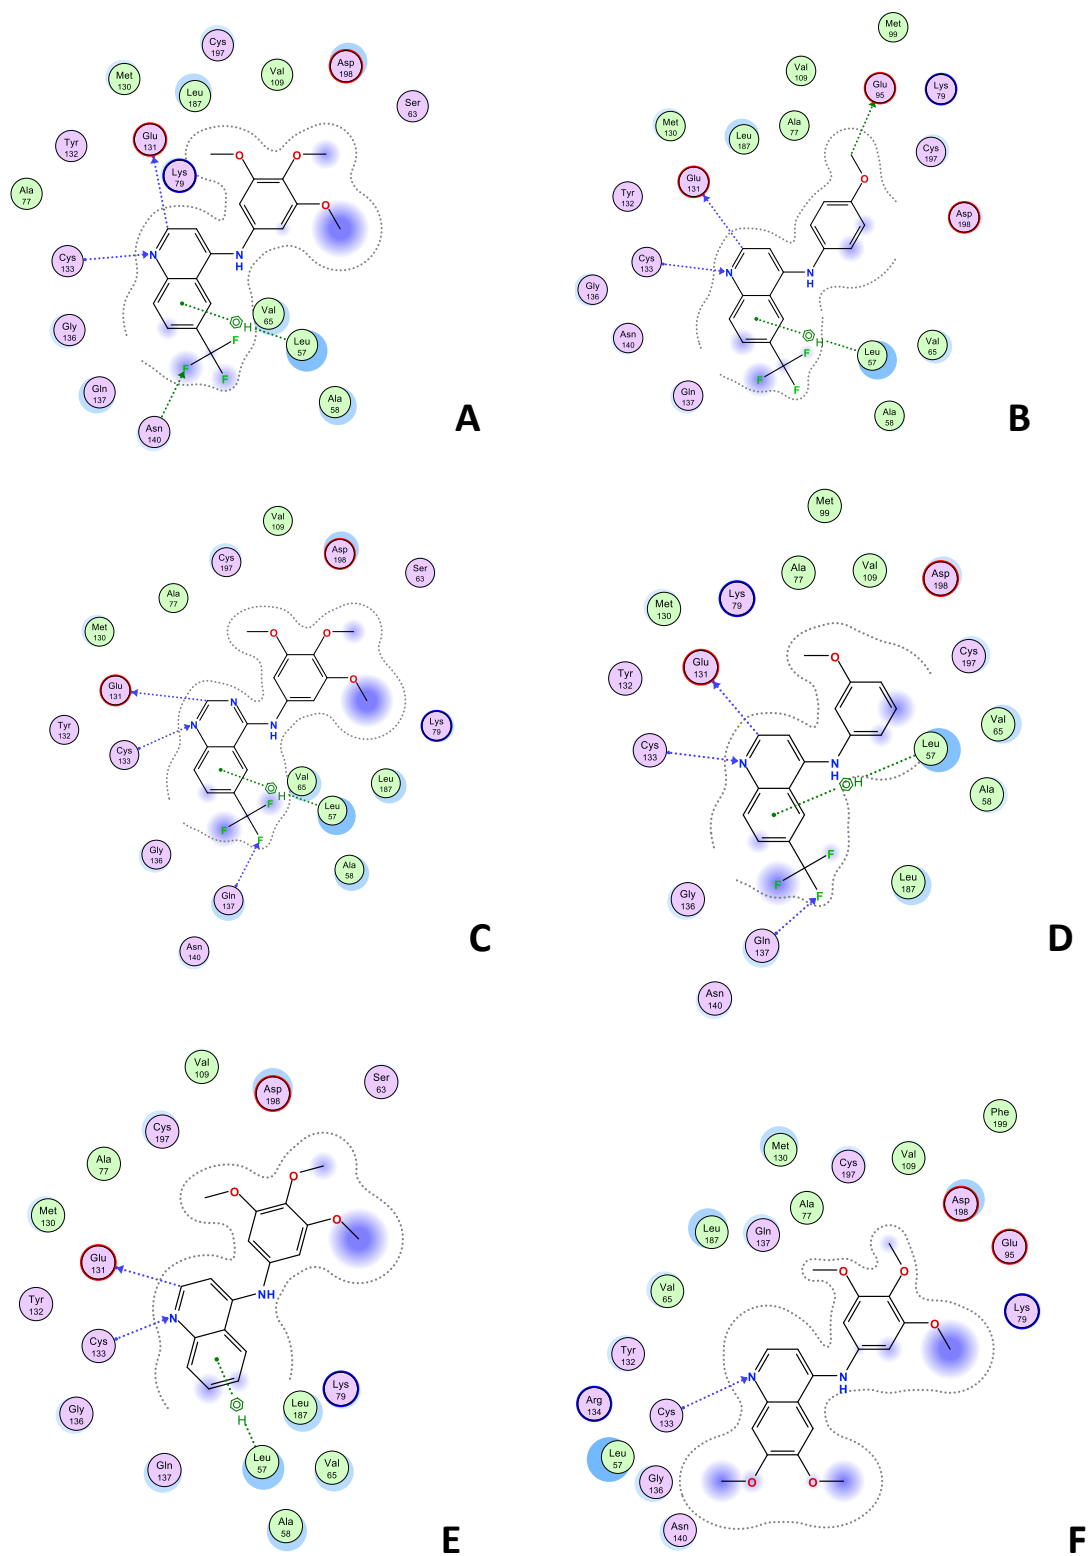



**Figure S7.** Ligand interaction diagrams in STK16 active site. A - Compound **1**, B - Compound **8**, C - Compound **9**, D - Compound **13**, E - Compound **41**, F - Compound **49**.

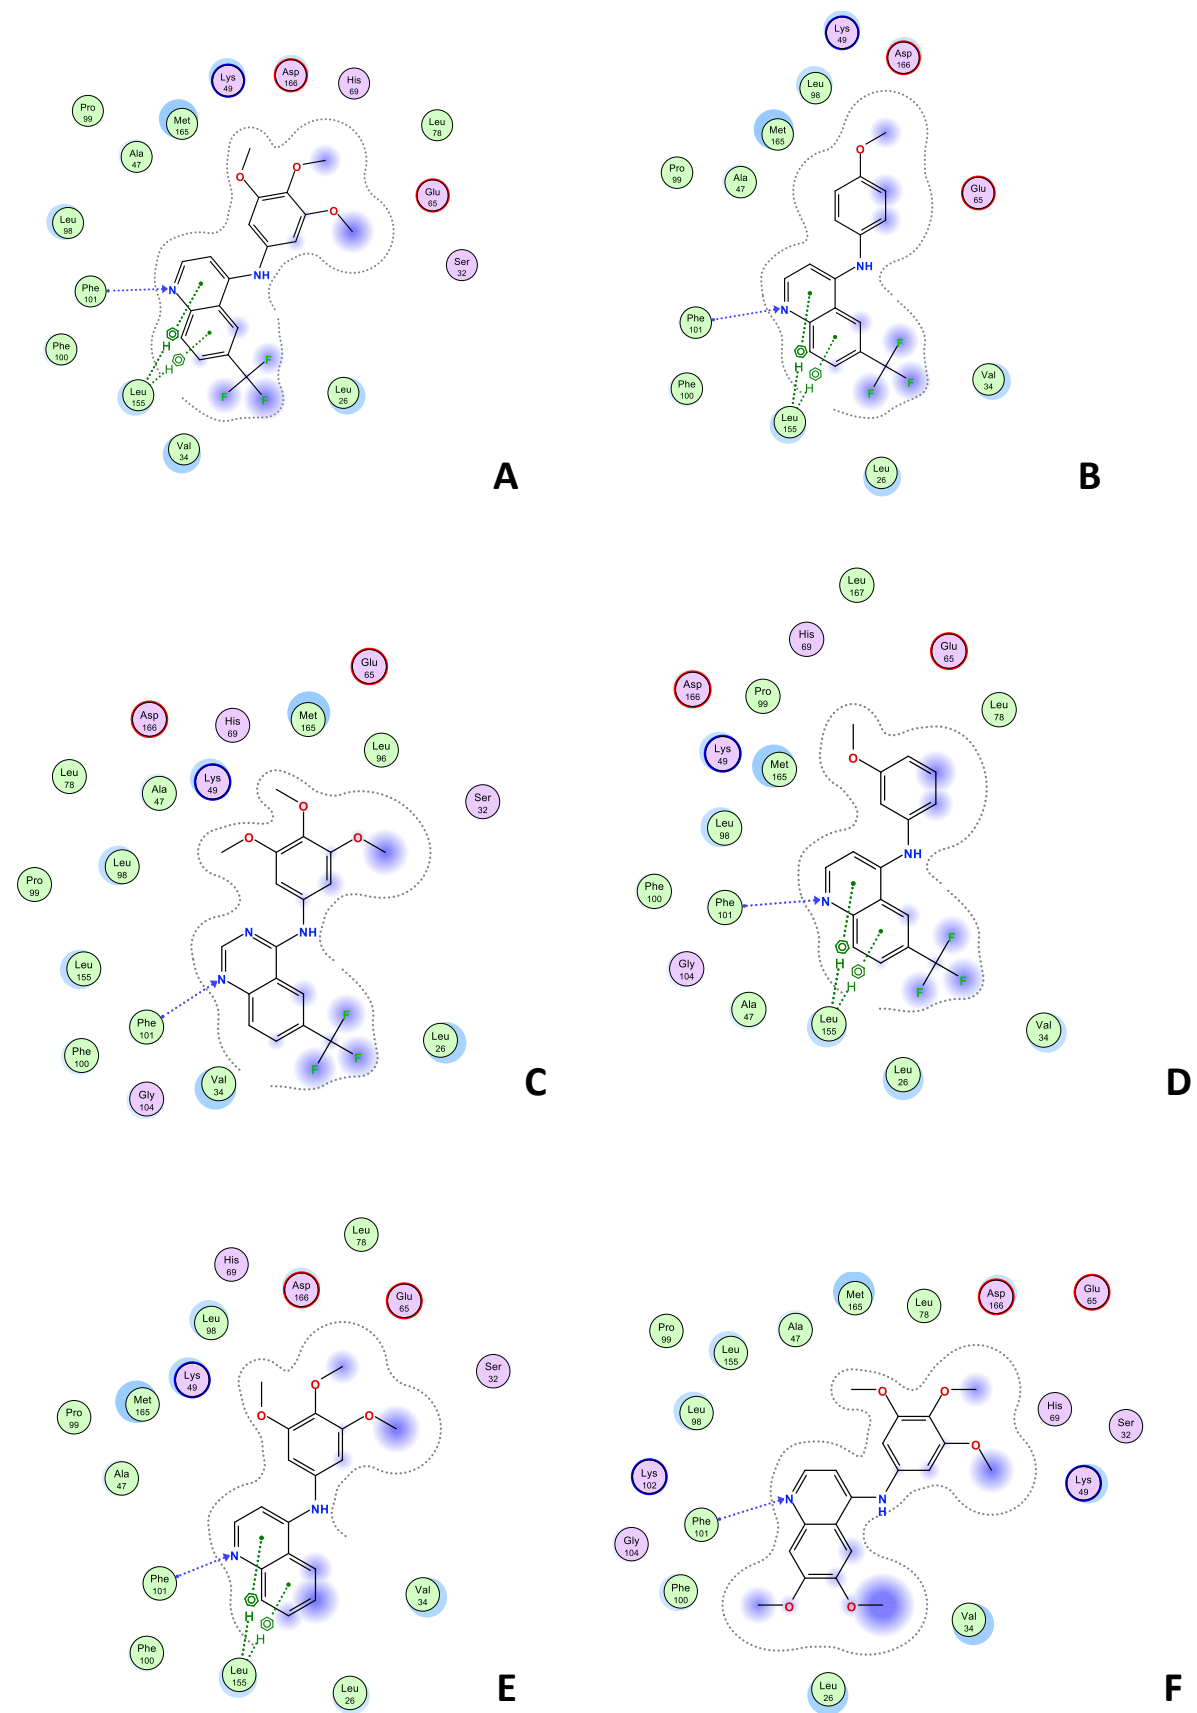

**Figure S8.** Ligand interaction diagrams of specific case studies - **10**, **39**, **40**, **49**, **31**, **37**, and **46**.

**10 - AAK1 (A) vs GAK (B)**

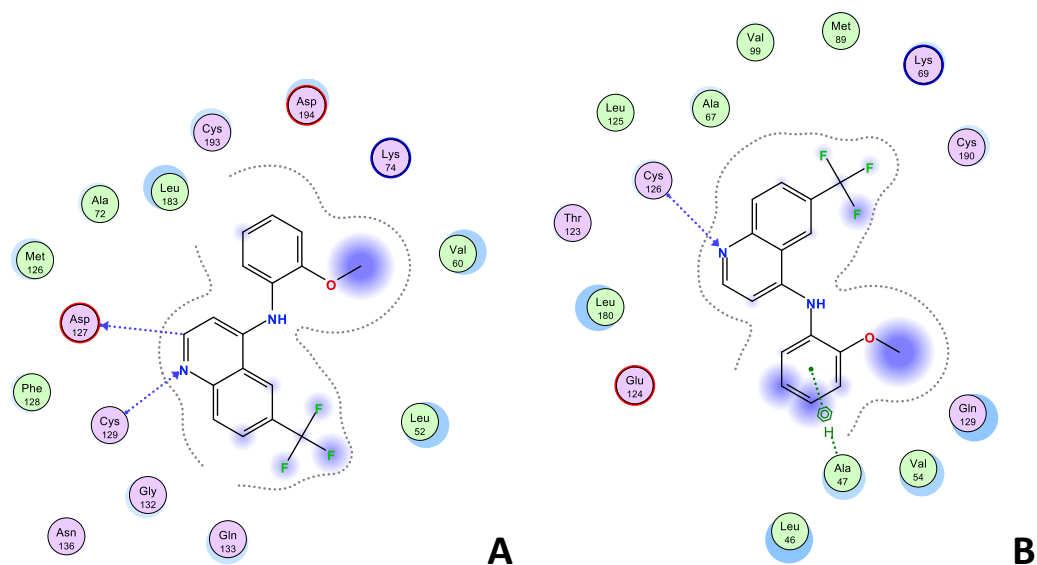

**39 - AAK1 (A) vs GAK (B)**

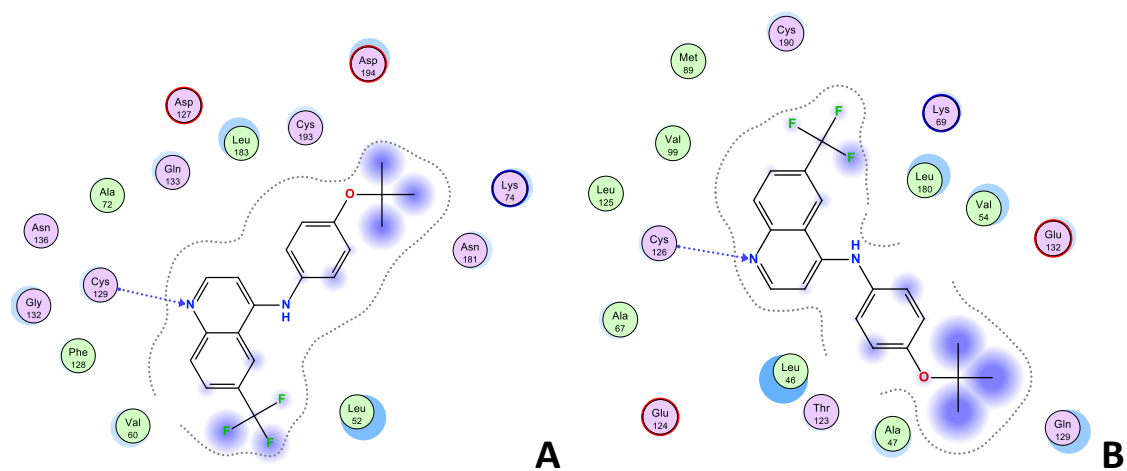

**40 - AAK1 (A) vs GAK (B)**

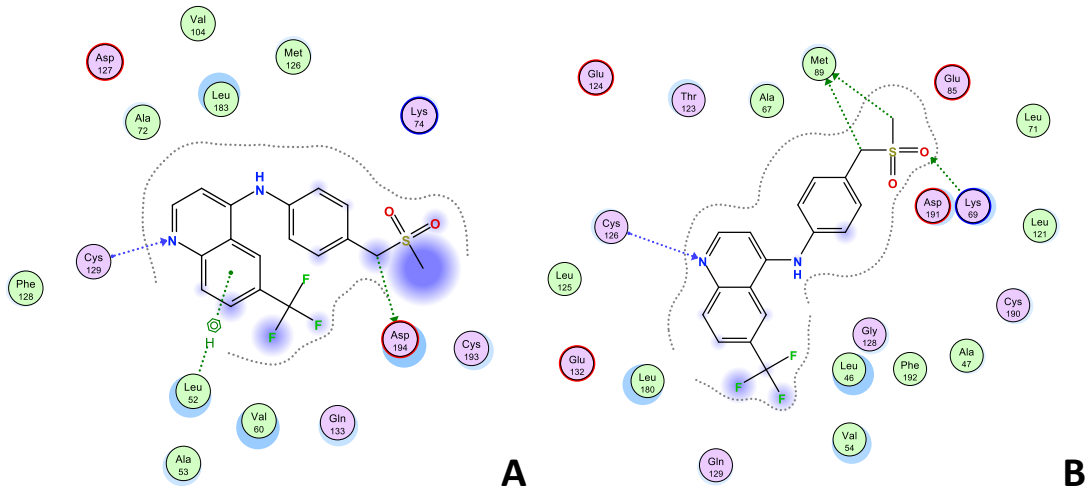

**49 - AAK1 (A) vs GAK (B)**

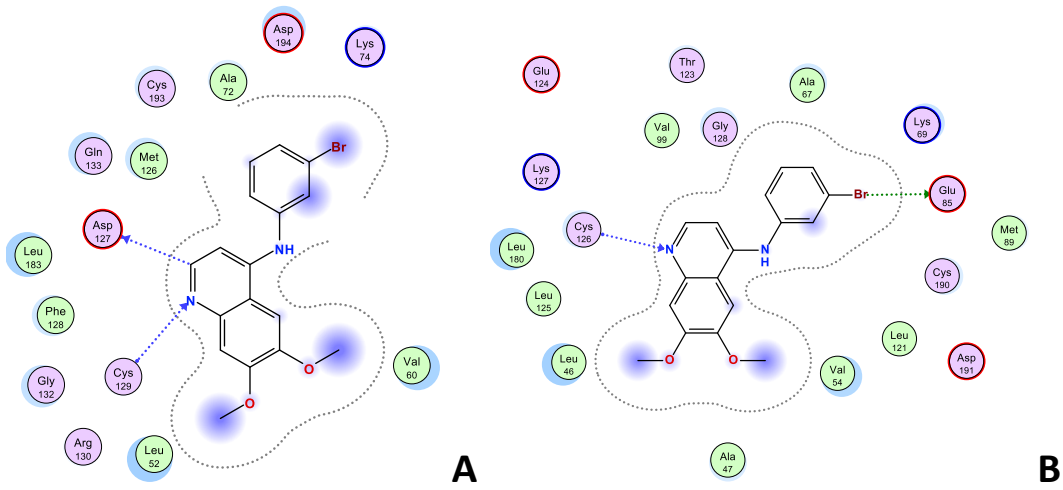

**31 - BMP2K (A) vs GAK (B)**

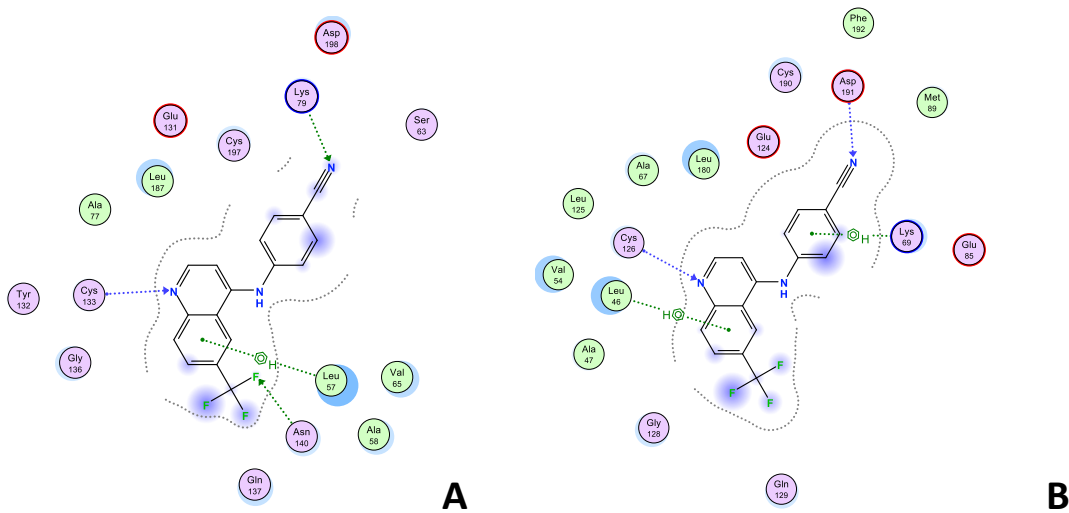

**37 - STK16 (A) vs GAK (B)**

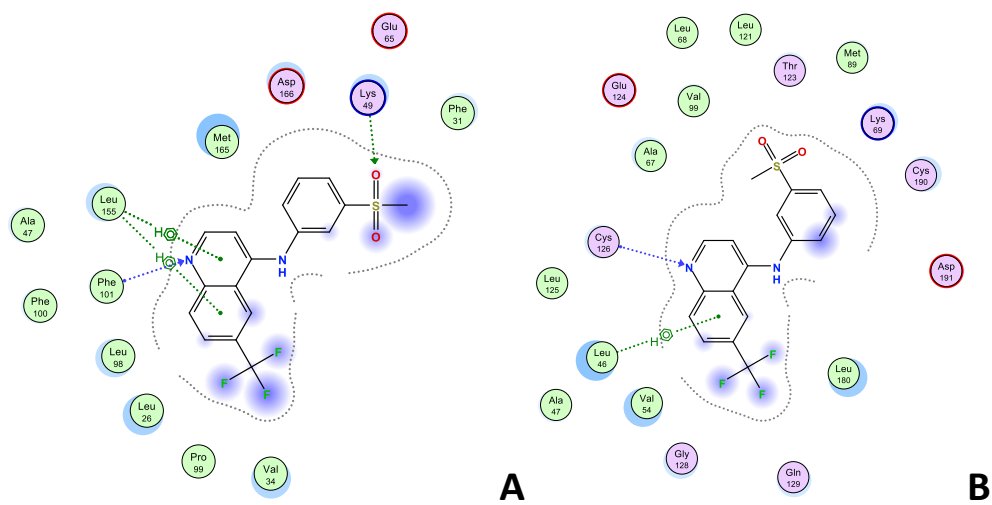

**46 - STK16 (A) vs GAK (B)**

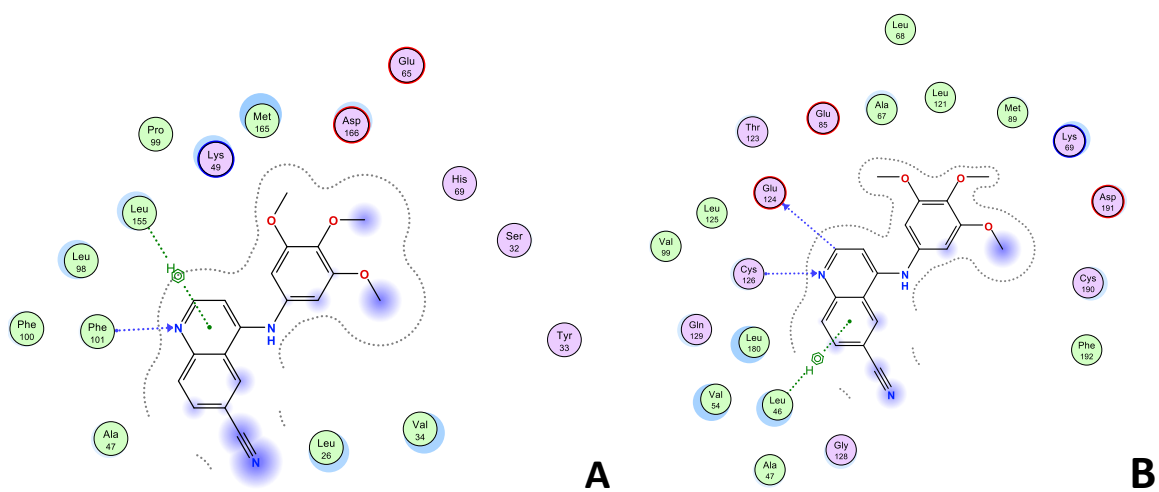

Figure S9. Pan-NAK compounds **36 - A** and **56 - B**

**GAK**

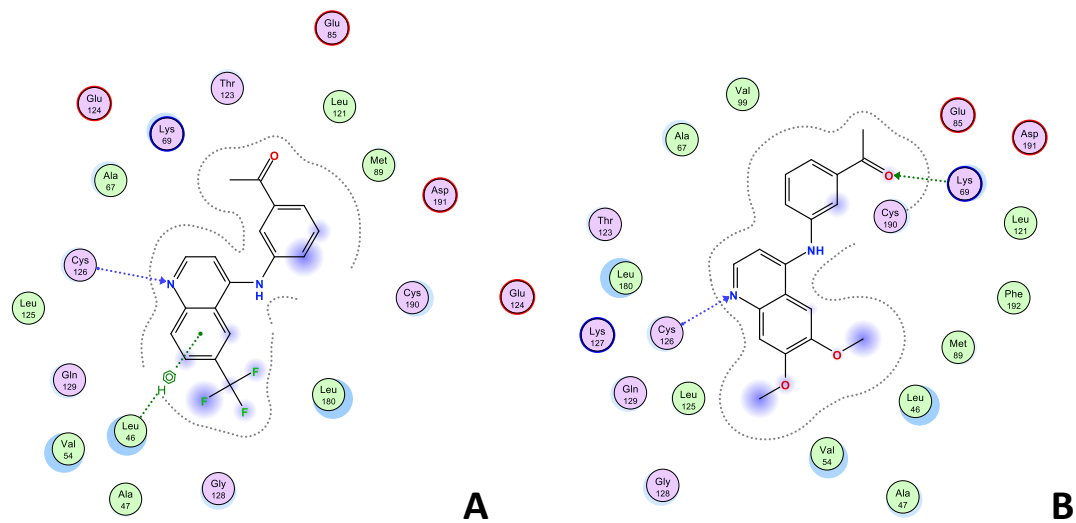

**AAK1**

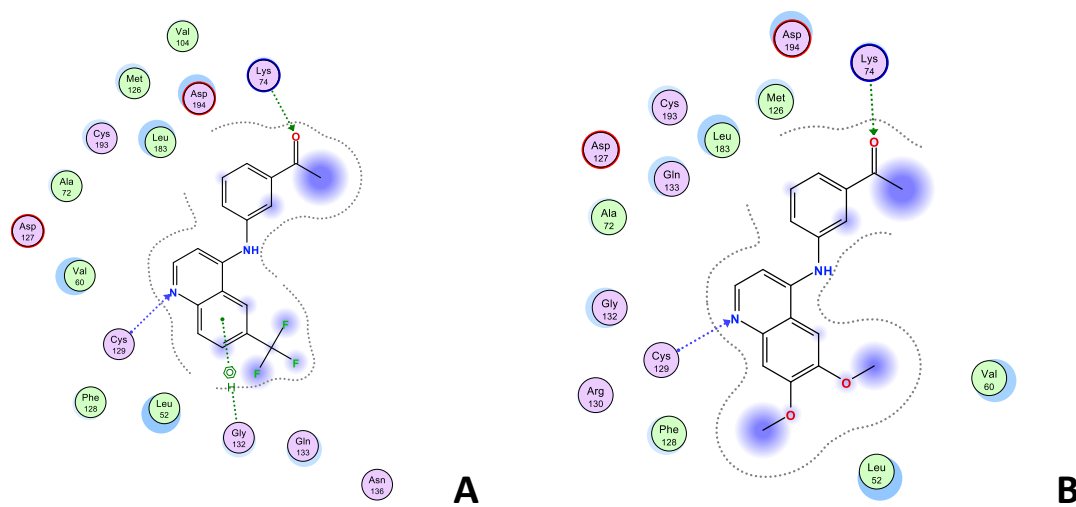

## BMP2K/BIKE

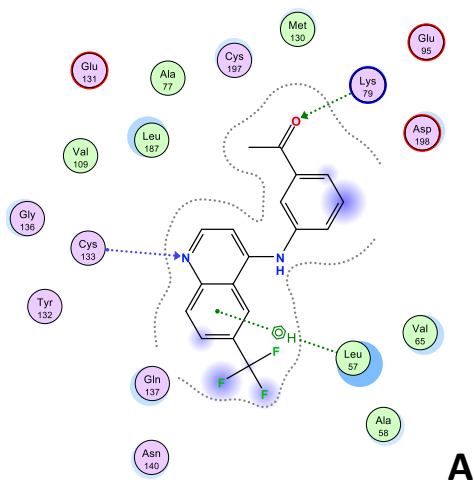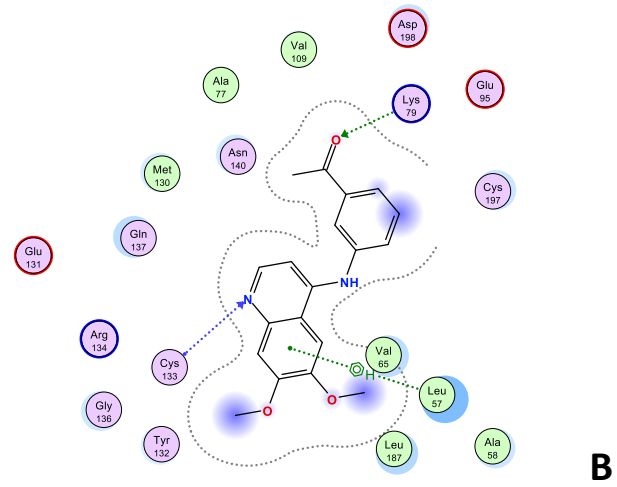

## STK16

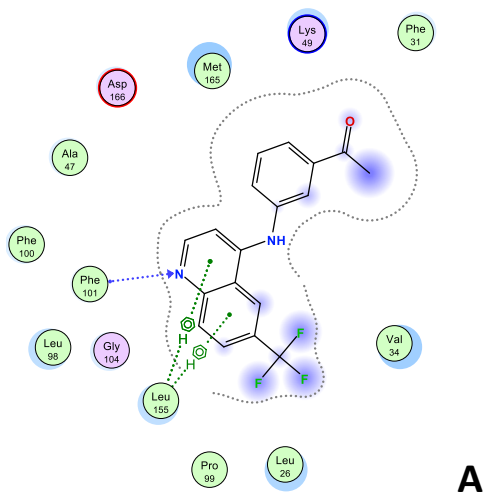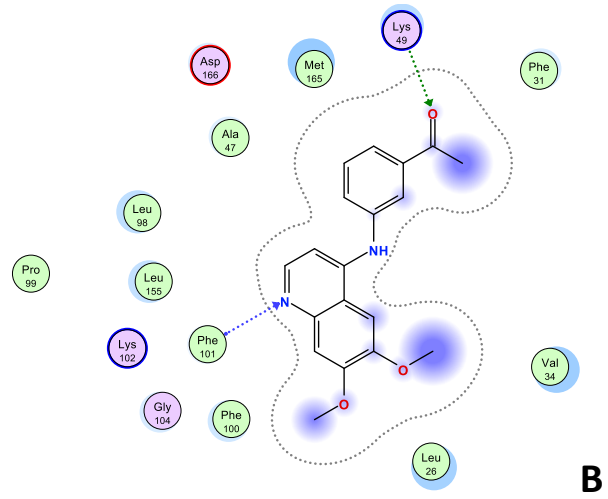

# LCMS/HRMS and $^1\text{H}/^{13}\text{C}$ NMR analysis 1-57

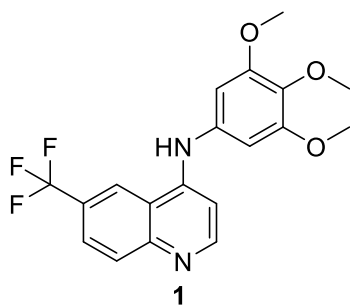

6-(Trifluoromethyl)-N-(3,4,5-trimethoxyphenyl)quinolin-4-amine (**1**)

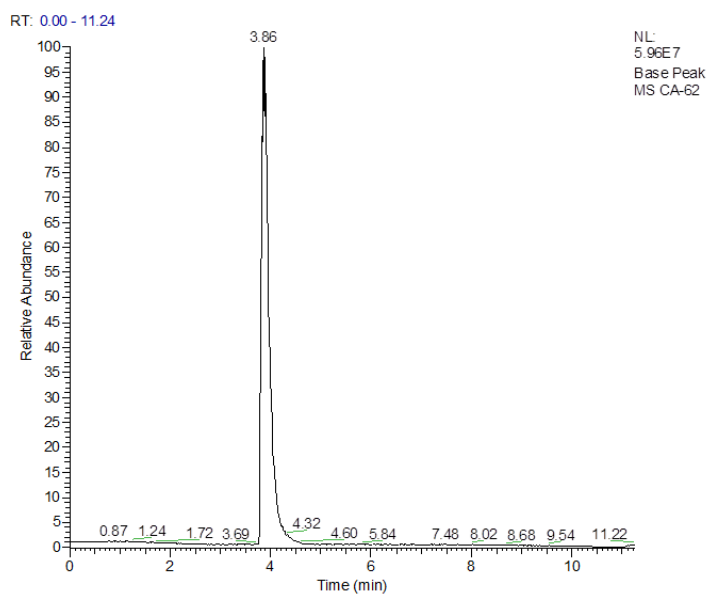

CA62 #1-100 RT: 0.01-1.49 AV: 100 NL: 8.27E6

T: FTMS + p ESI Full ms [150.00-2000.00]

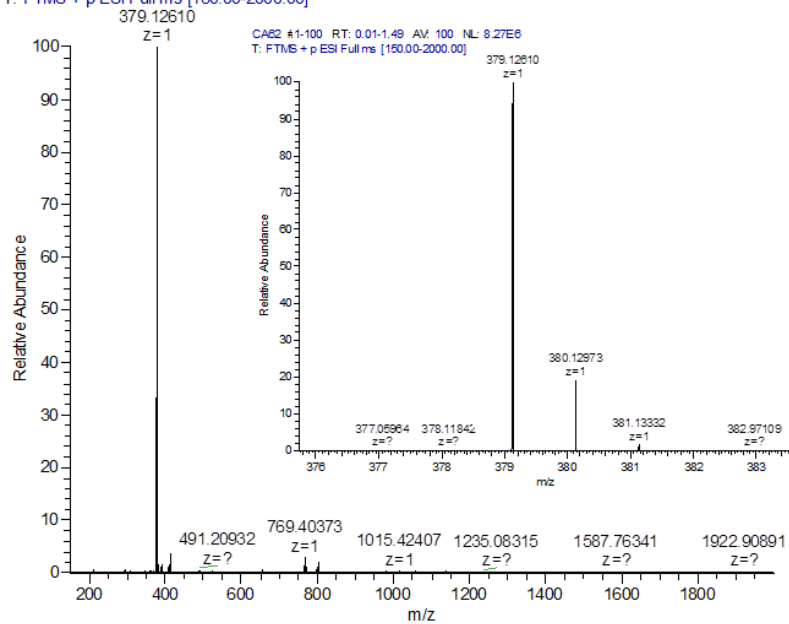

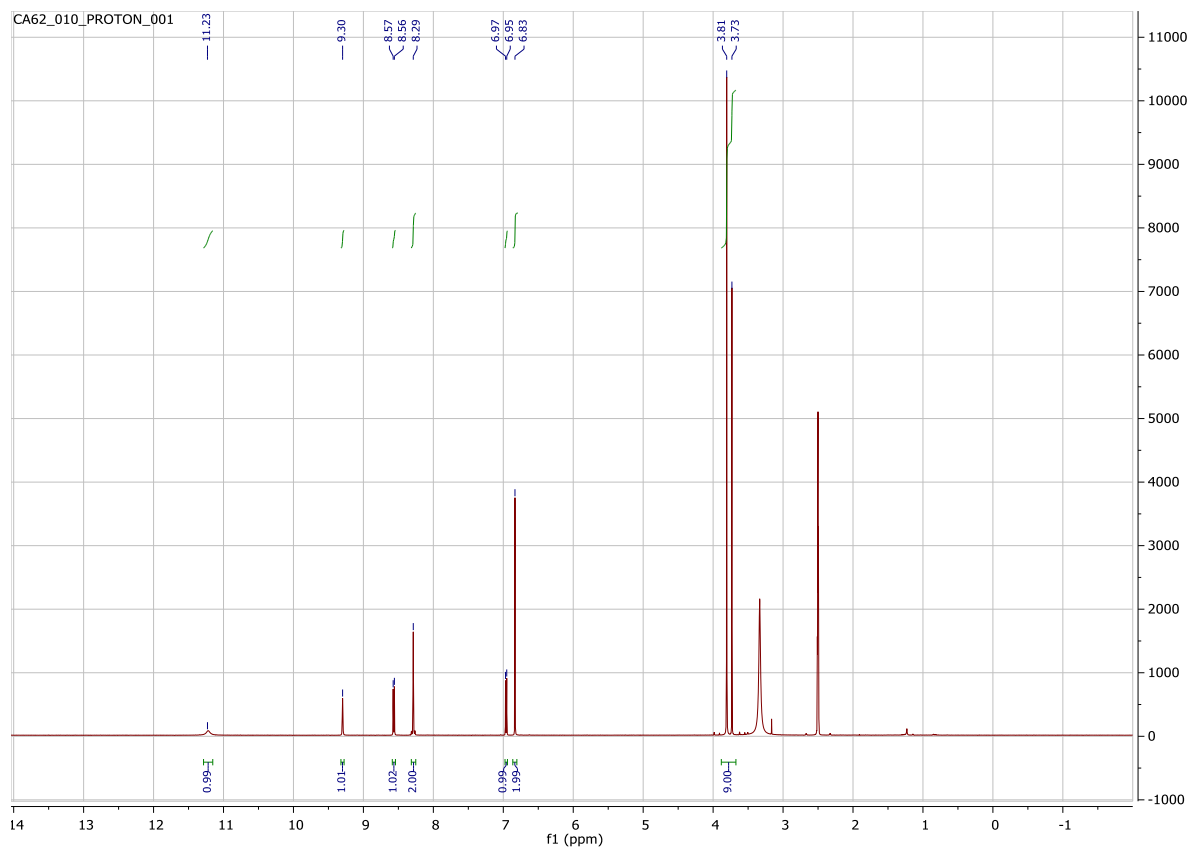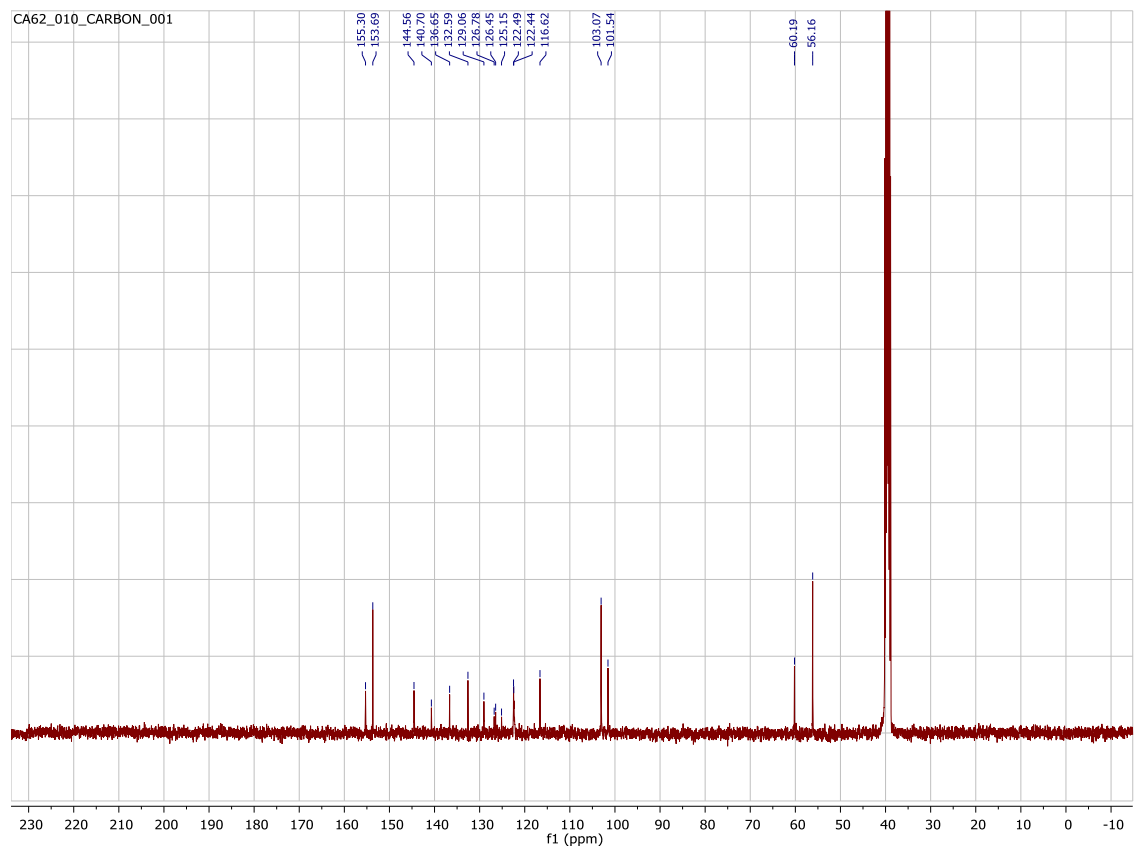



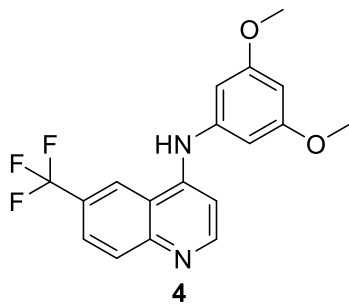

*N*-(3,5-Dimethoxyphenyl)-6-(trifluoromethyl)quinolin-4-amine (**4**)

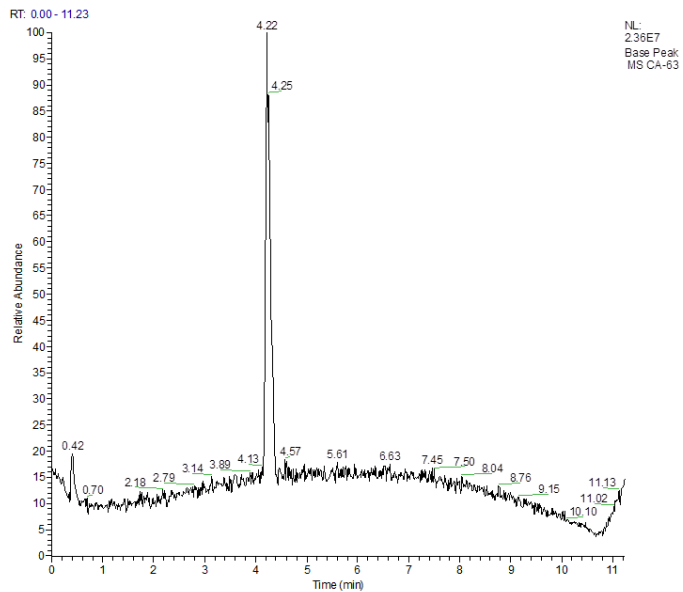

CA-63 #271-300 RT: 4.04-4.47 AV: 30 NL: 7.23E6  
T: FTMS + p ESI Full ms [100.00-2000.00]

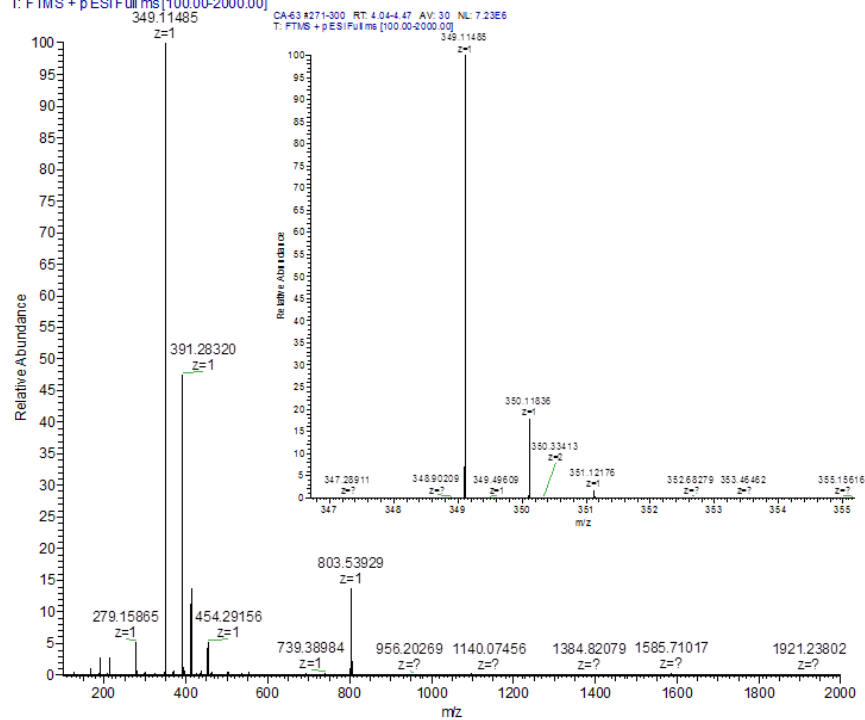

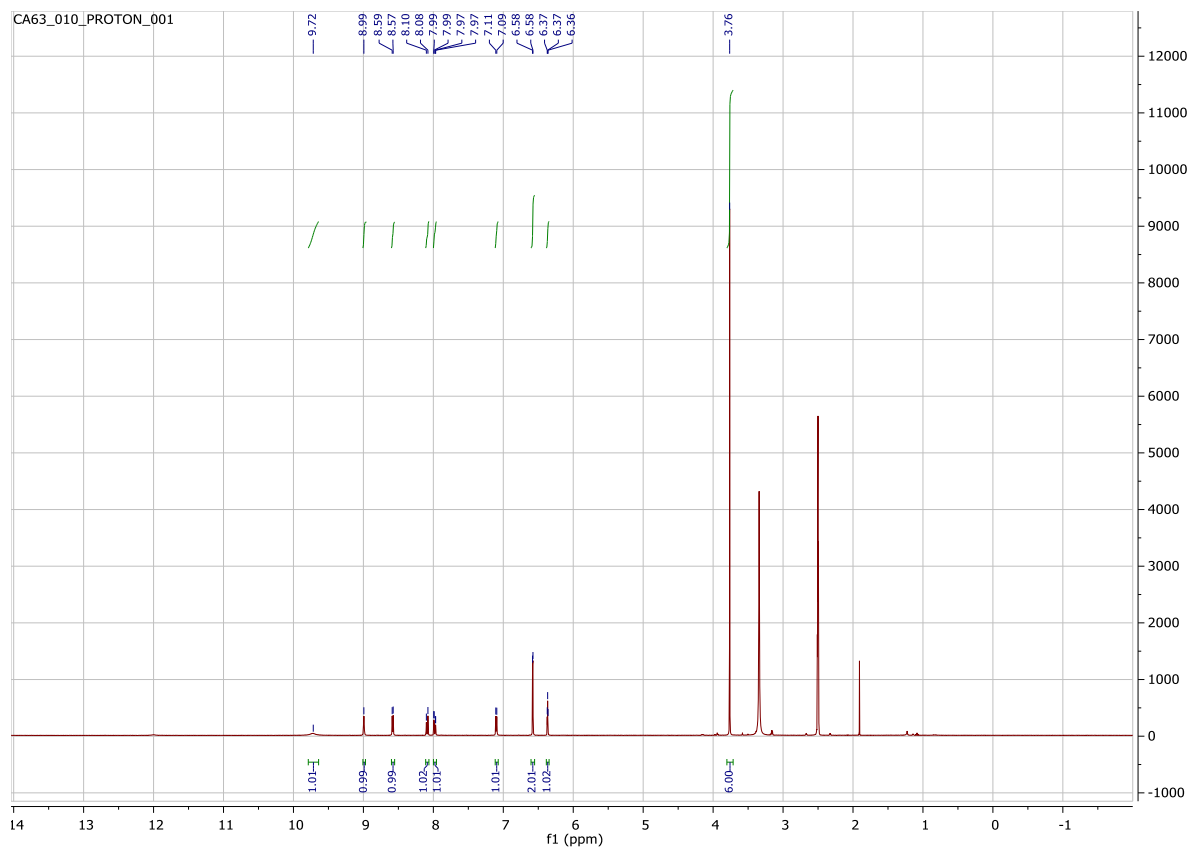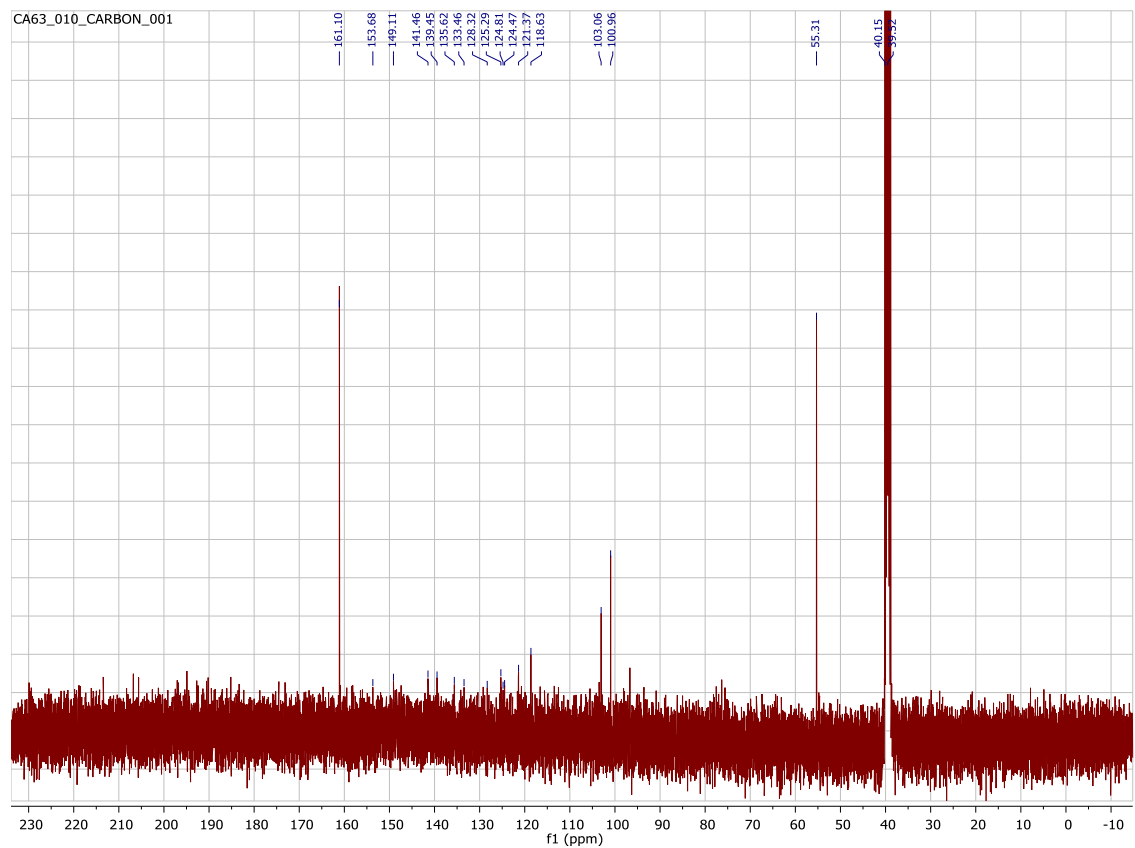

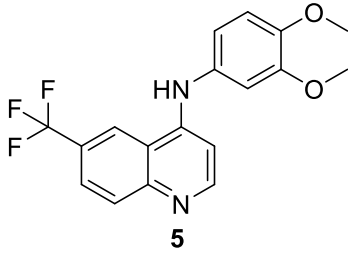

*N*-(3,4-Dimethoxyphenyl)-6-(trifluoromethyl)quinolin-4-amine (**5**)

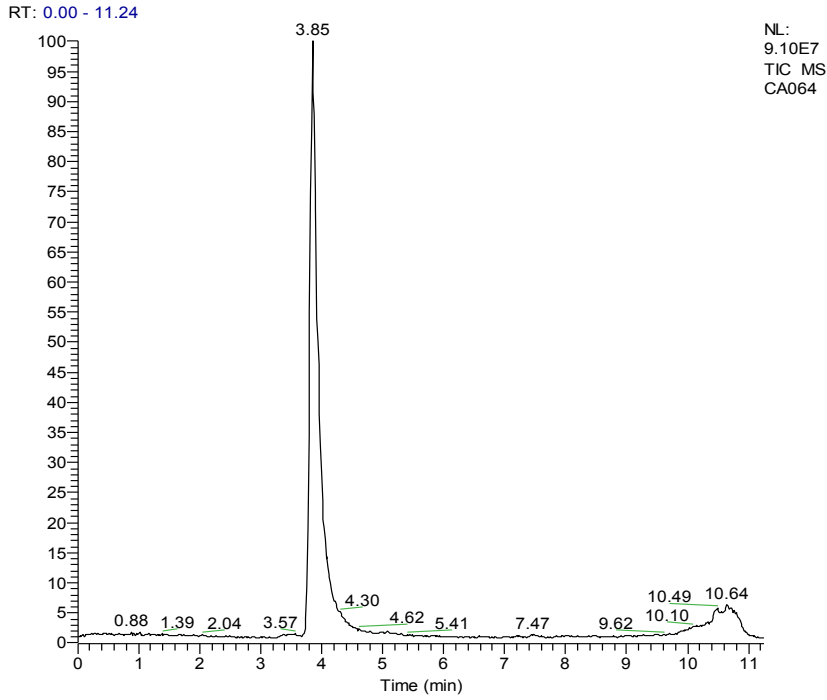

CA064 #230-261 RT: 3.66-4.13 AV: 32 NL: 1.80E7  
T: FTMS + p ESI Full ms [100.00-2000.00]

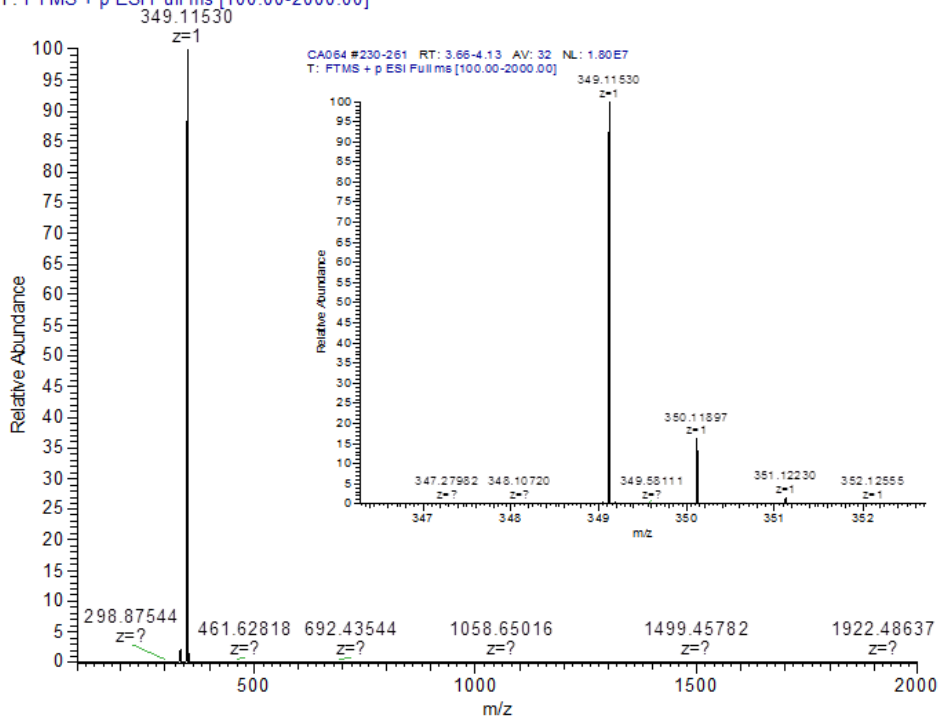

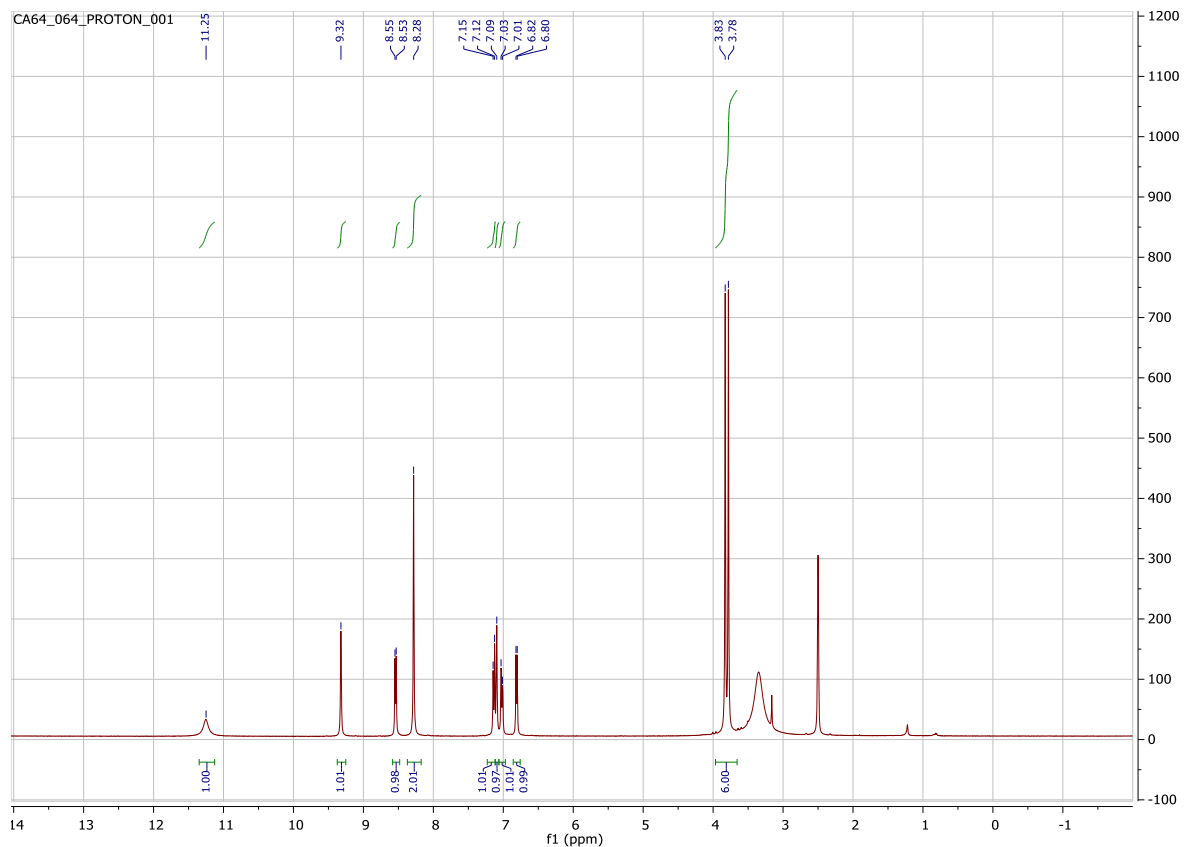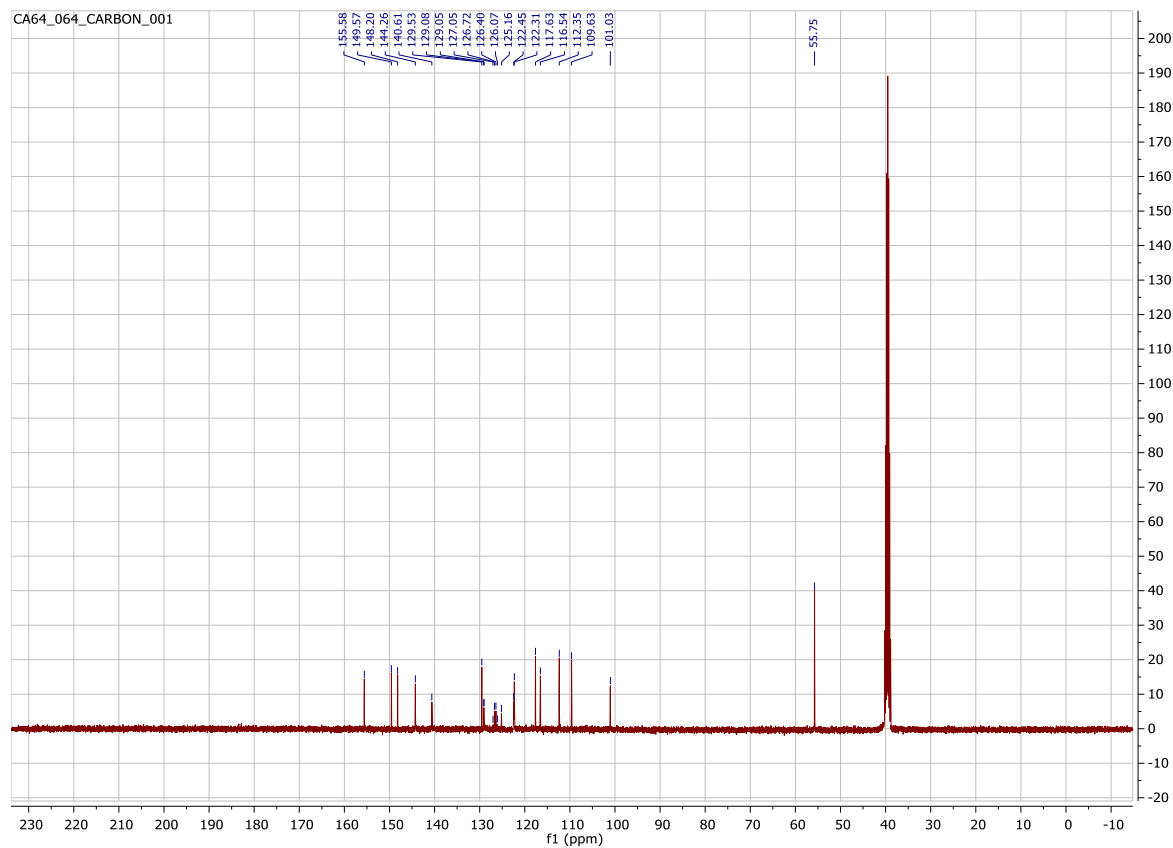

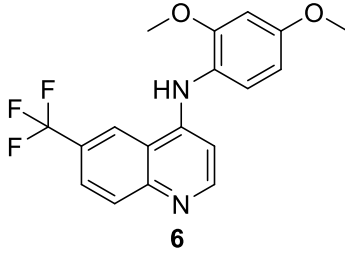

N-(2,4-Dimethoxyphenyl)-6-(trifluoromethyl)quinolin-4-amine (**6**)

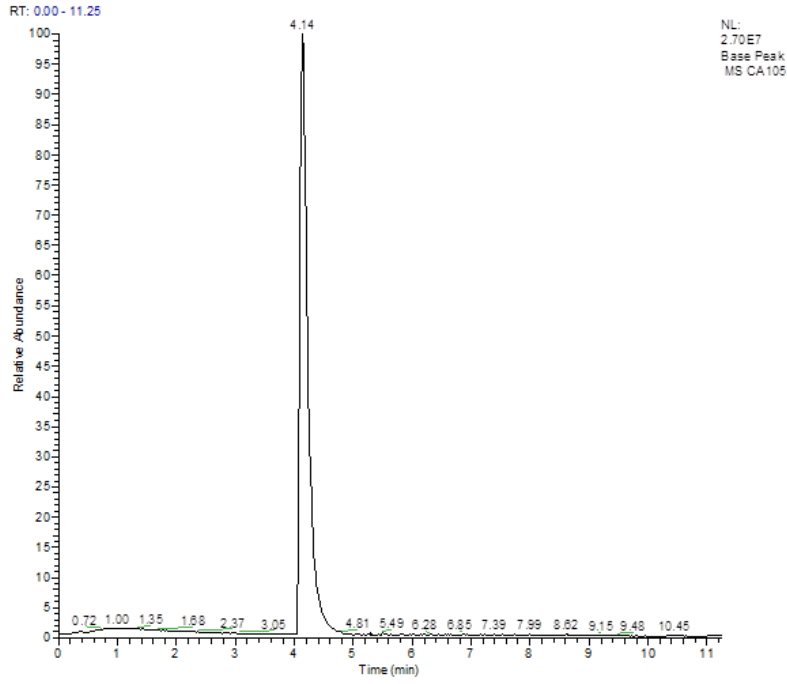

CA105 #250-284 RT: 3.98-4.50 AV: 35 NL: 8.15E6  
T: FTMS + p ESI Full ms [100.00-2000.00]

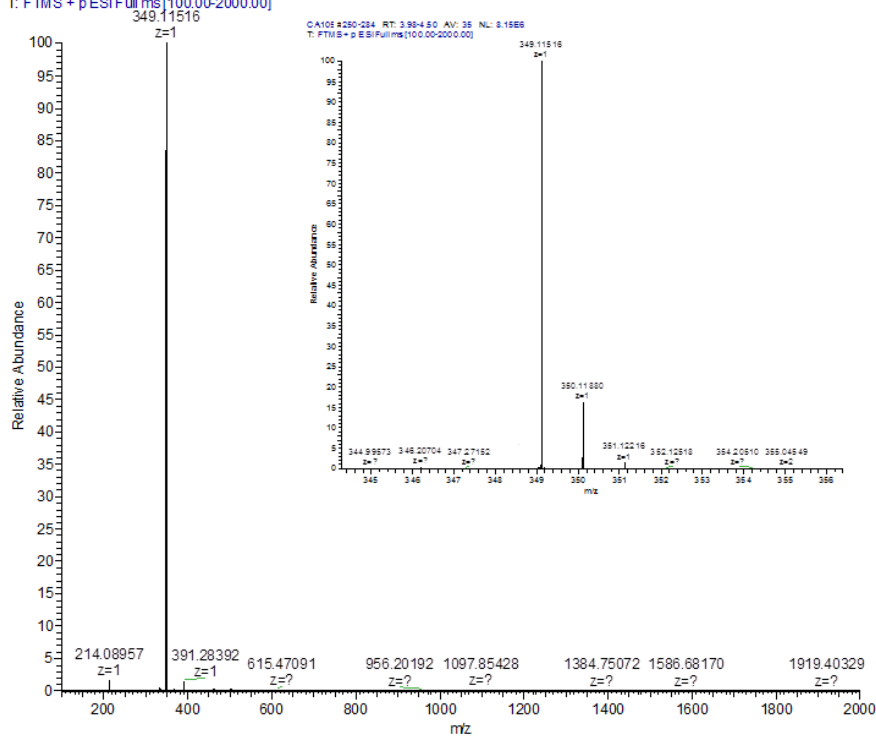

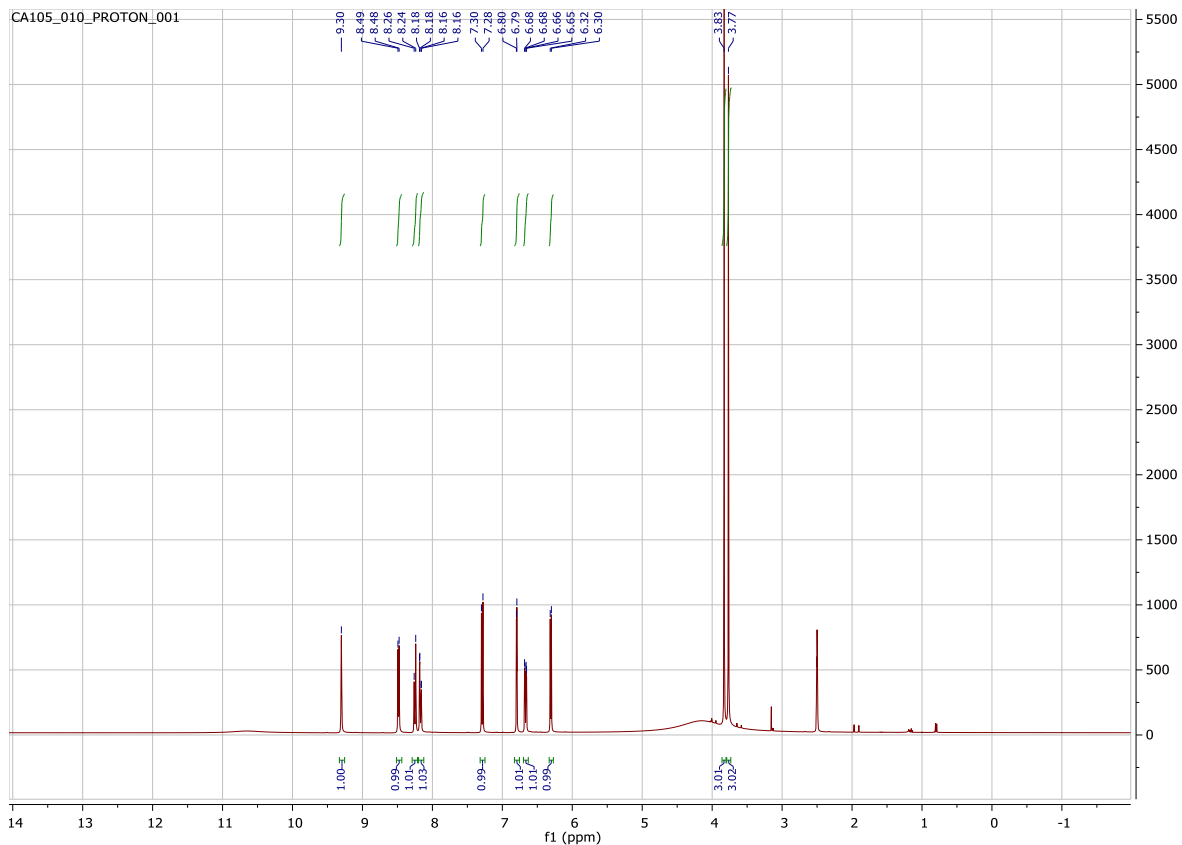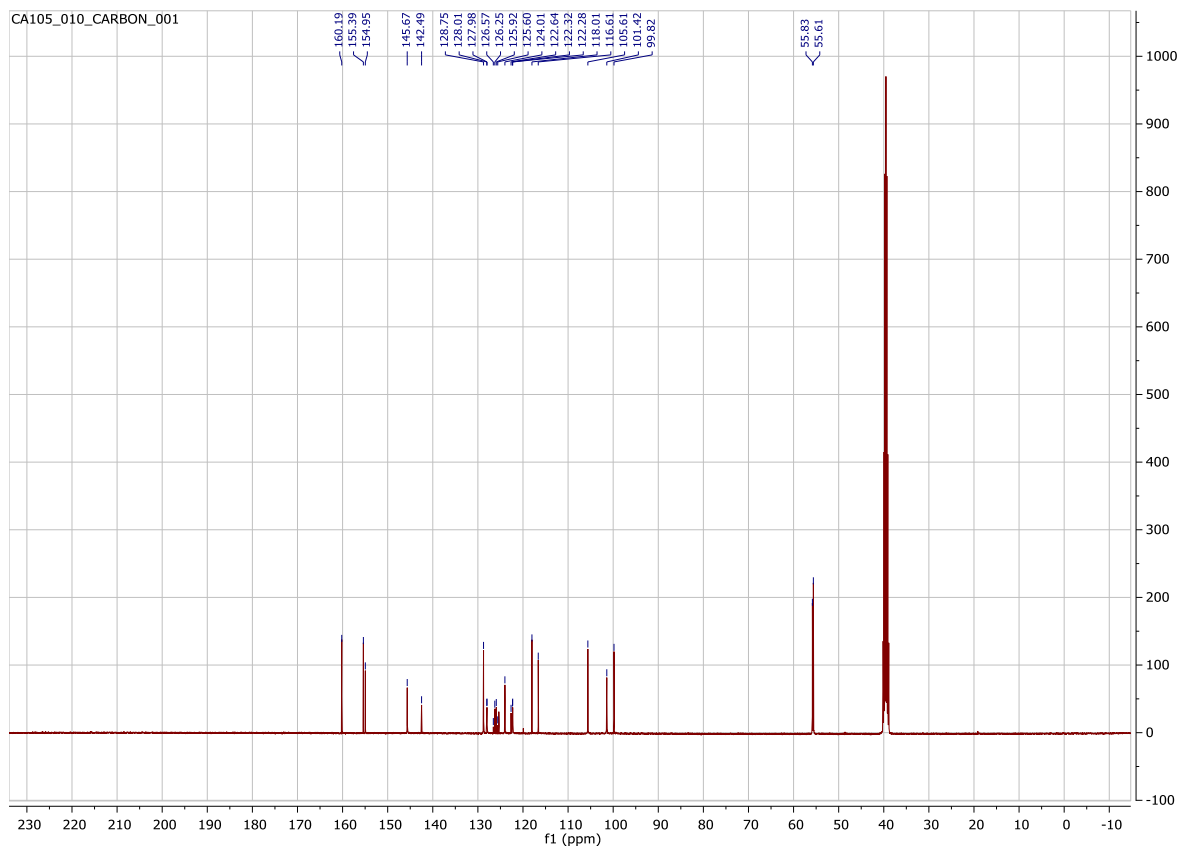

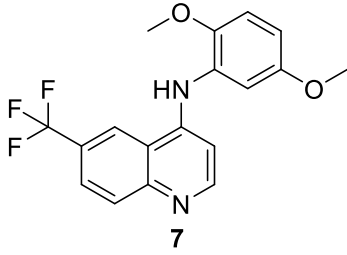

**N-(2,5-Dimethoxyphenyl)-6-(trifluoromethyl)quinolin-4-amine (7)**

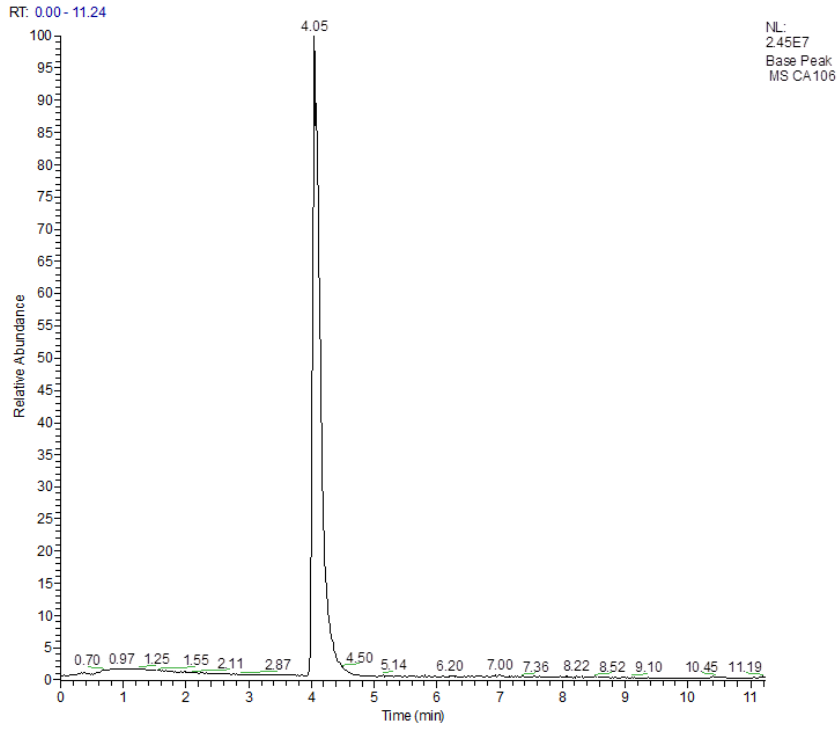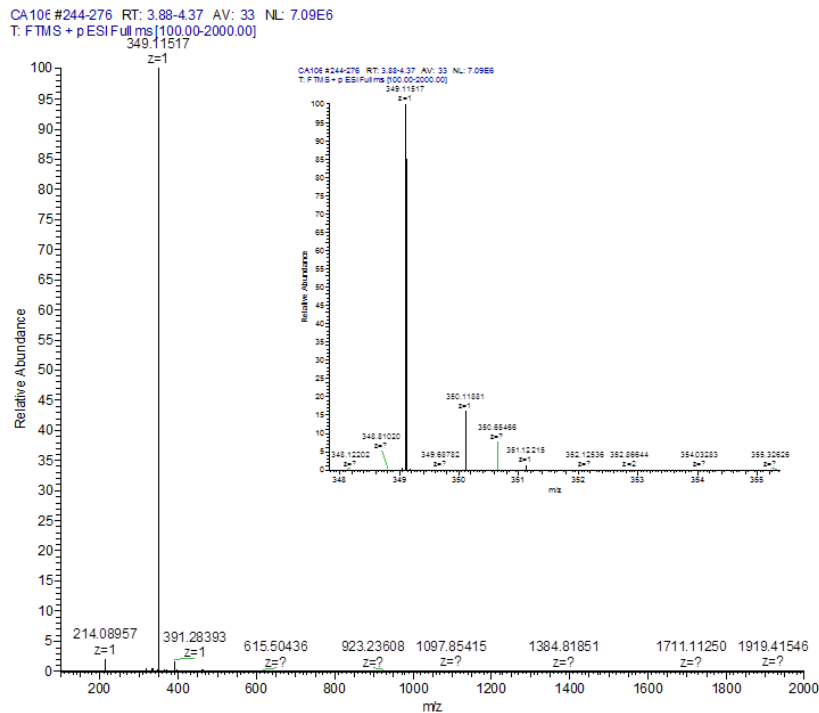

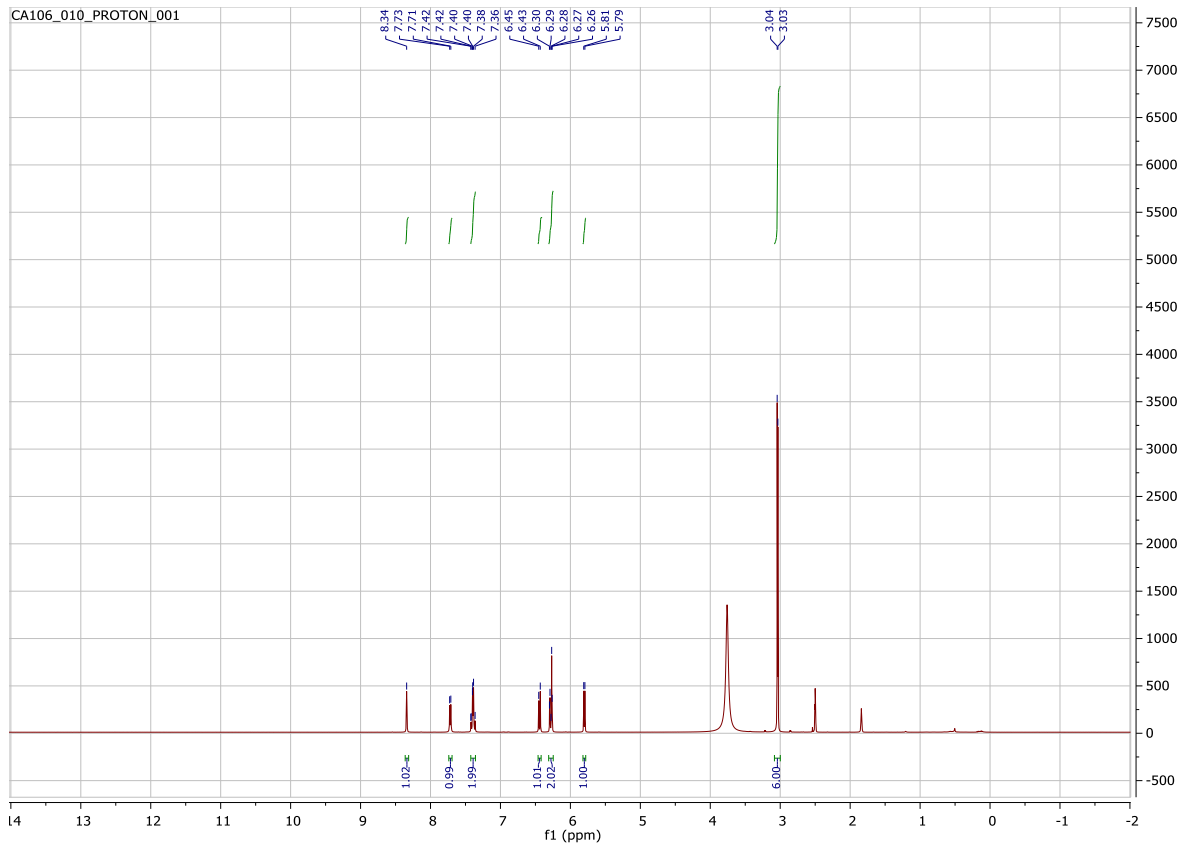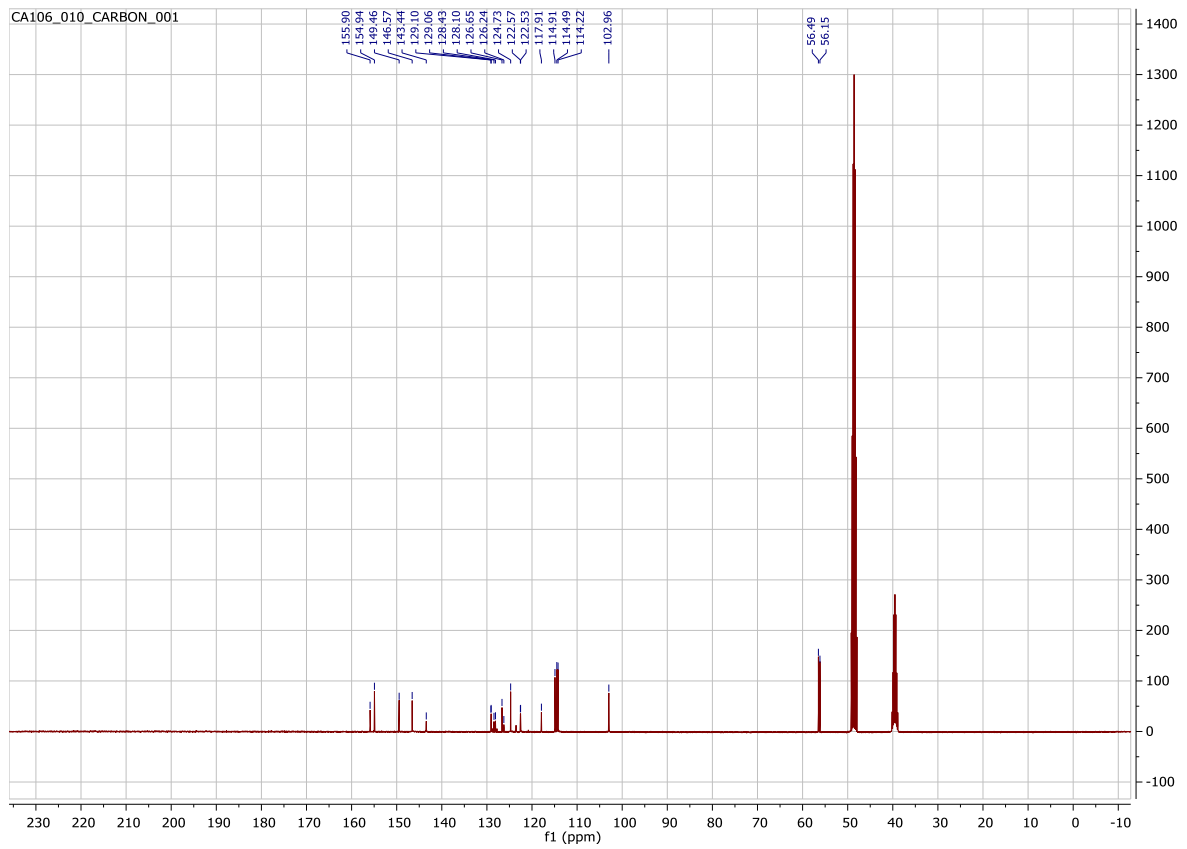



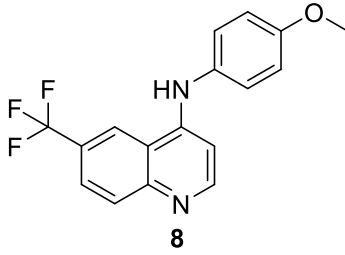

*N*-(4-Methoxyphenyl)-6-(trifluoromethyl)quinolin-4-amine (**8**)

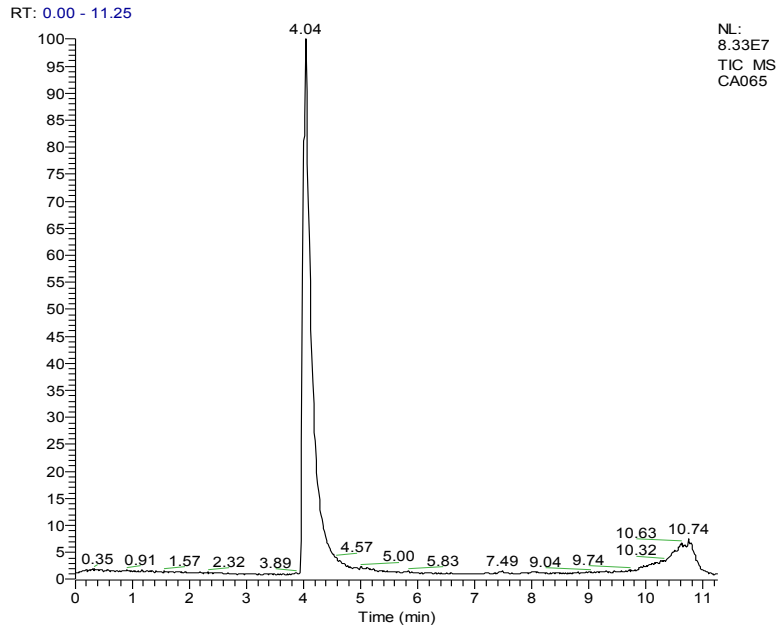

CA065 #239-272 RT: 3.82-4.33 AV: 34 NL: 1.51E7  
T: FTMS + p ESI Full ms [100.00-2000.00]

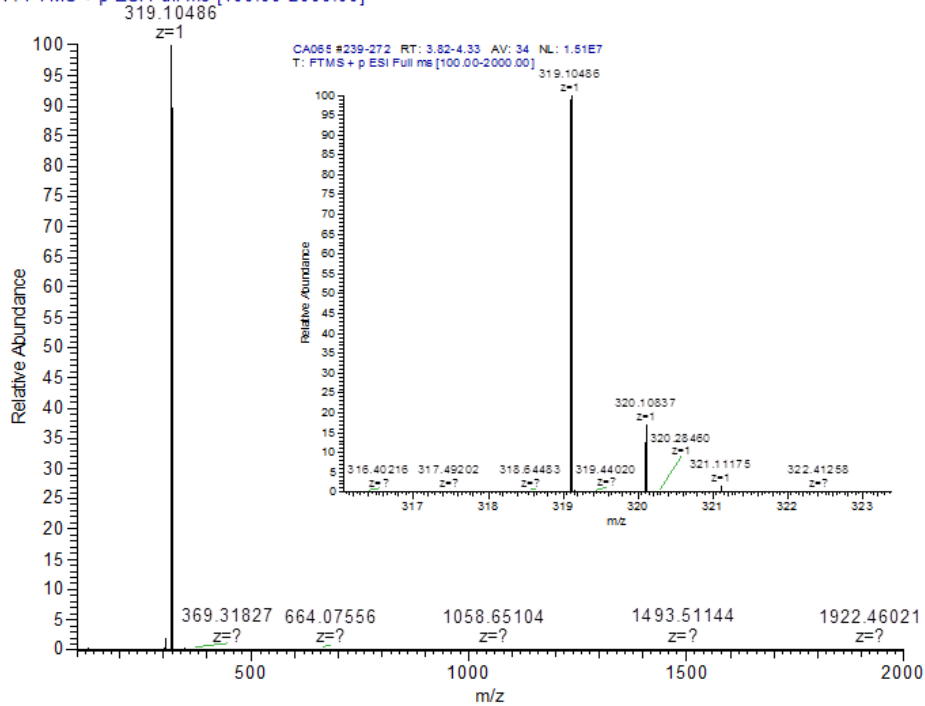

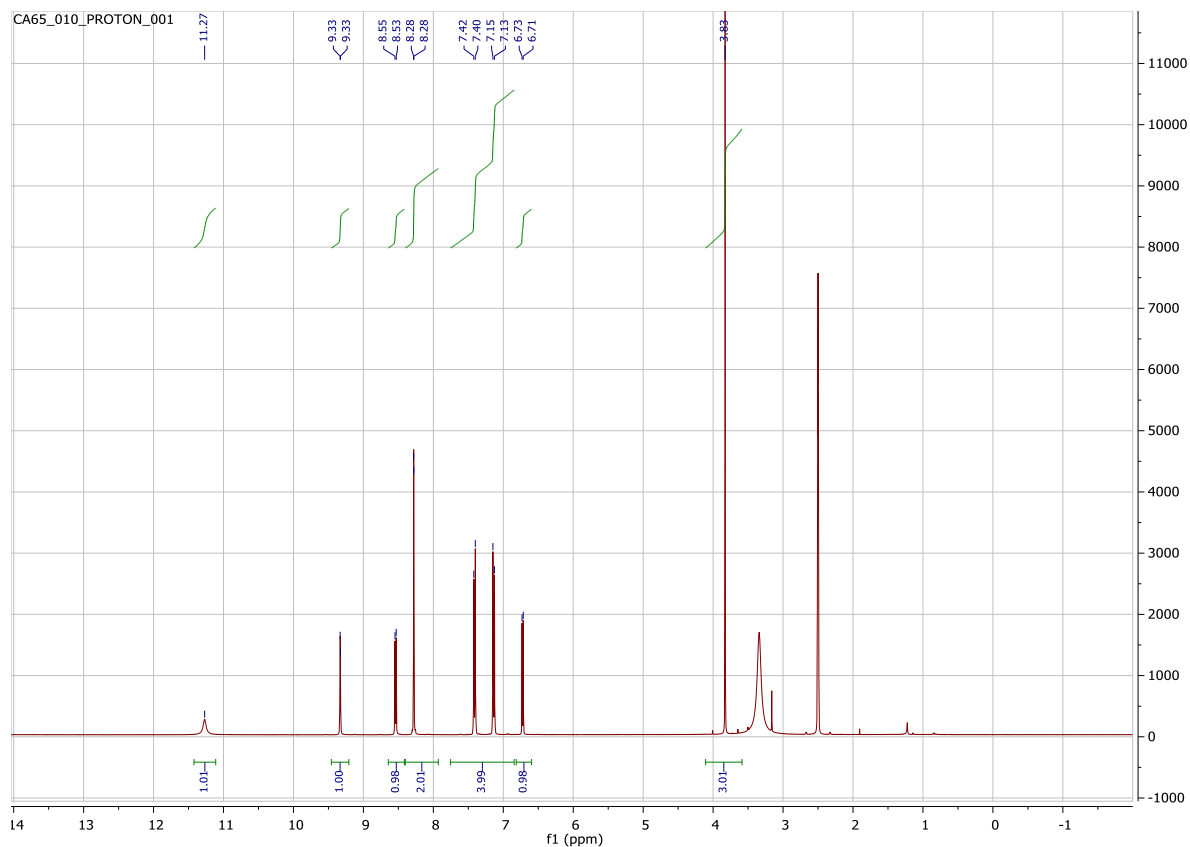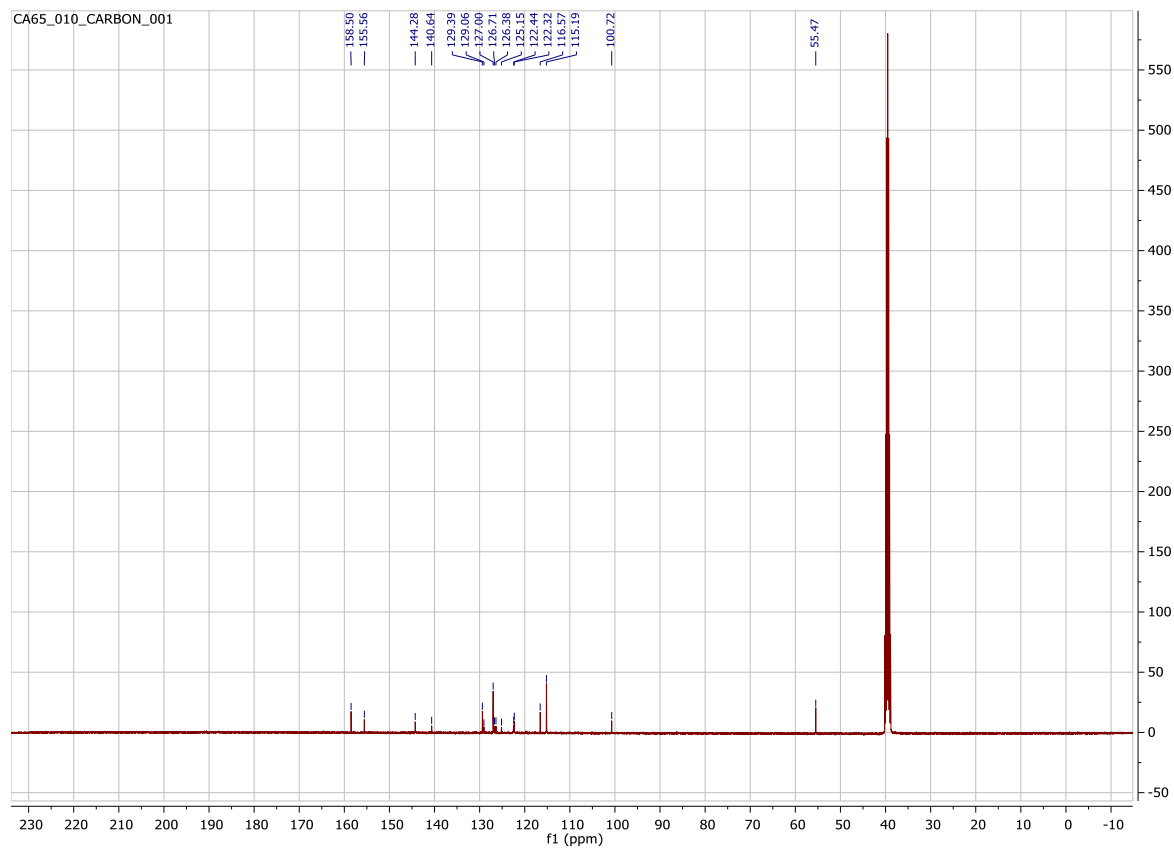

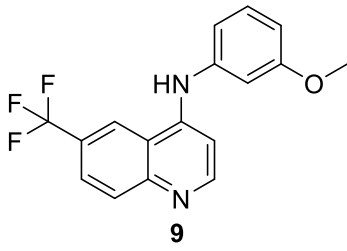

*N*-(3-Methoxyphenyl)-6-(trifluoromethyl)quinolin-4-amine (**9**)

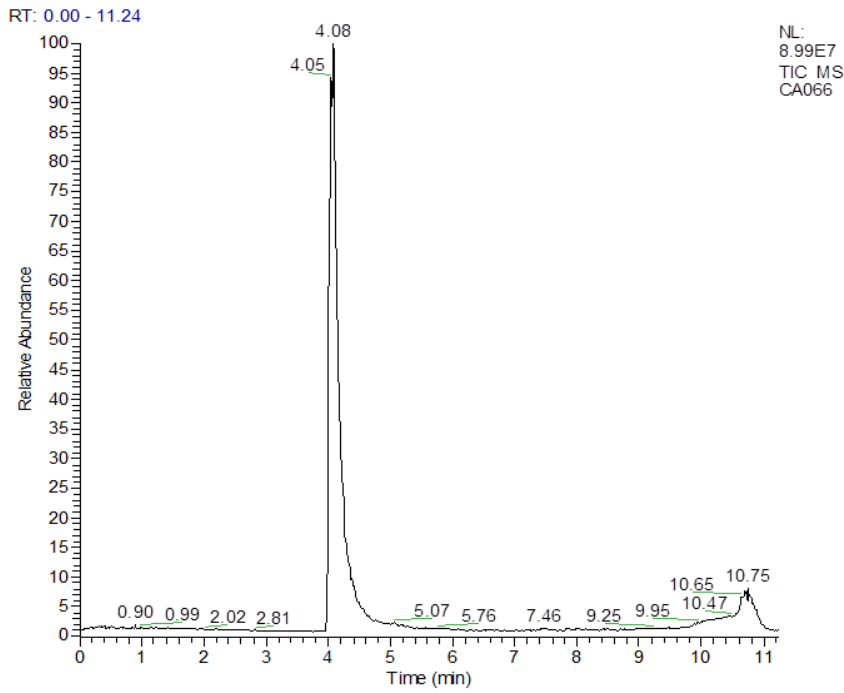

CA066 #243-270 RT: 3.90-4.30 AV: 28 NL: 1.93E7  
T: FTMS + p ESI Full ms [100.00-2000.00]

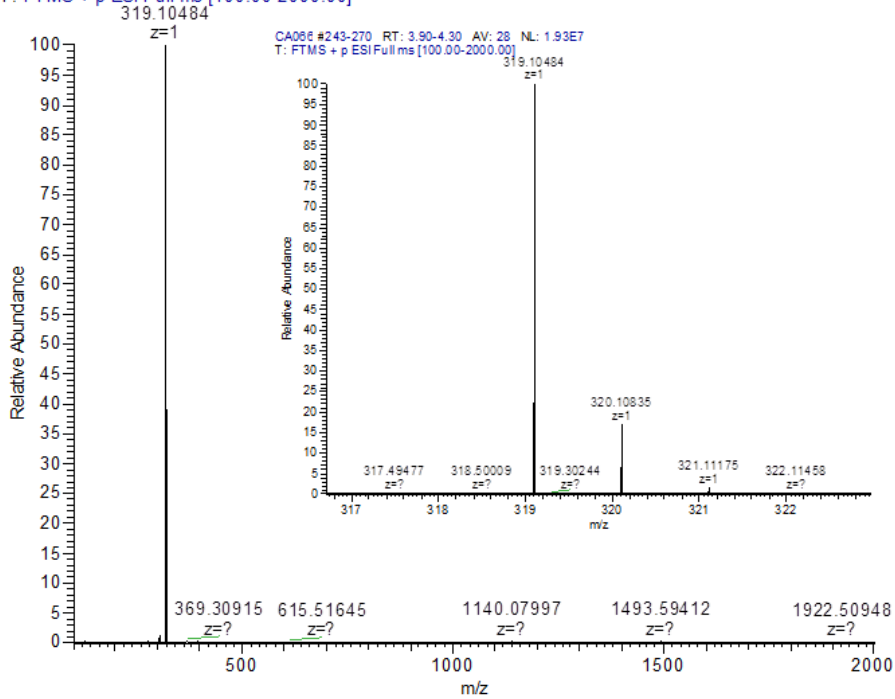

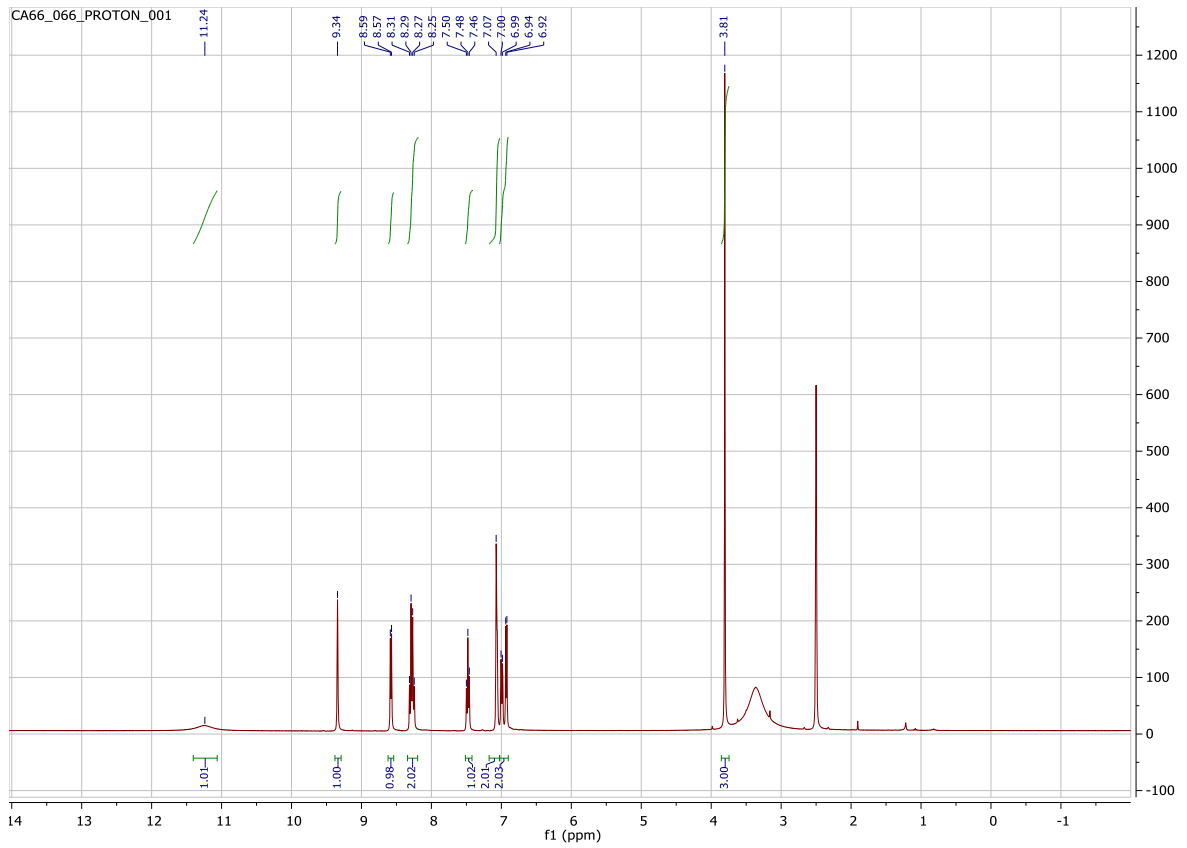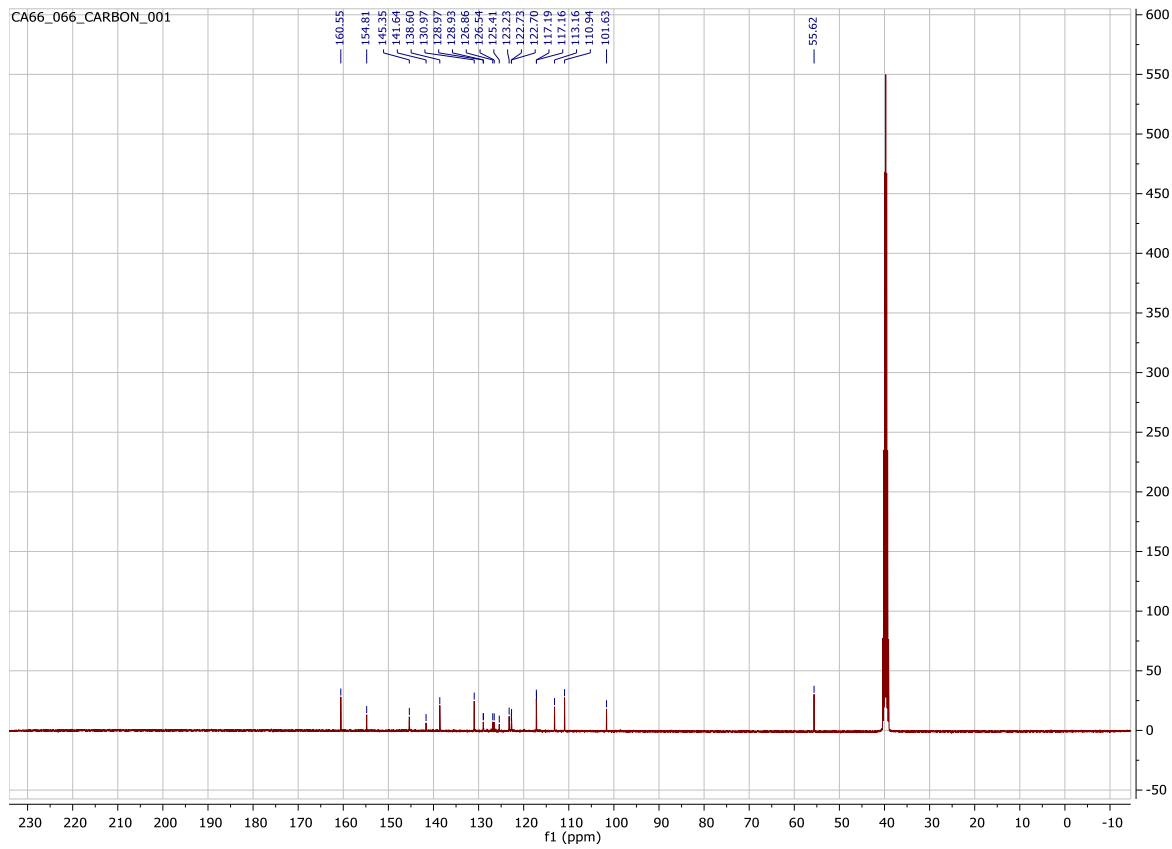

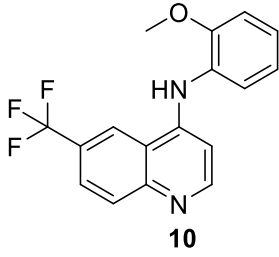

N-(2-Methoxyphenyl)-6-(trifluoromethyl)quinolin-4-amine (**10**)

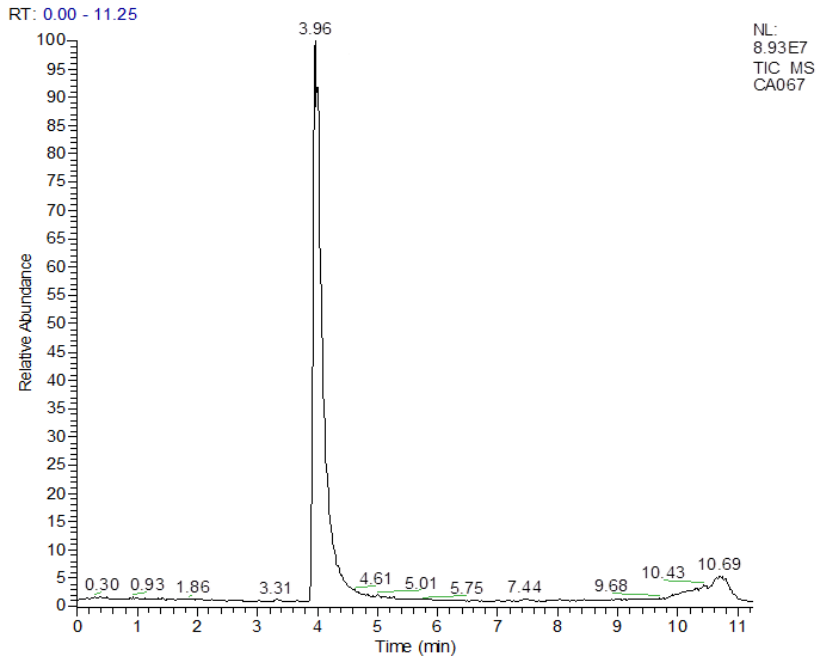

CA067 #237-271 RT: 3.80-4.32 AV: 35 NL: 1.57E7  
T: FTMS + p ESI Full ms [100.00-2000.00]

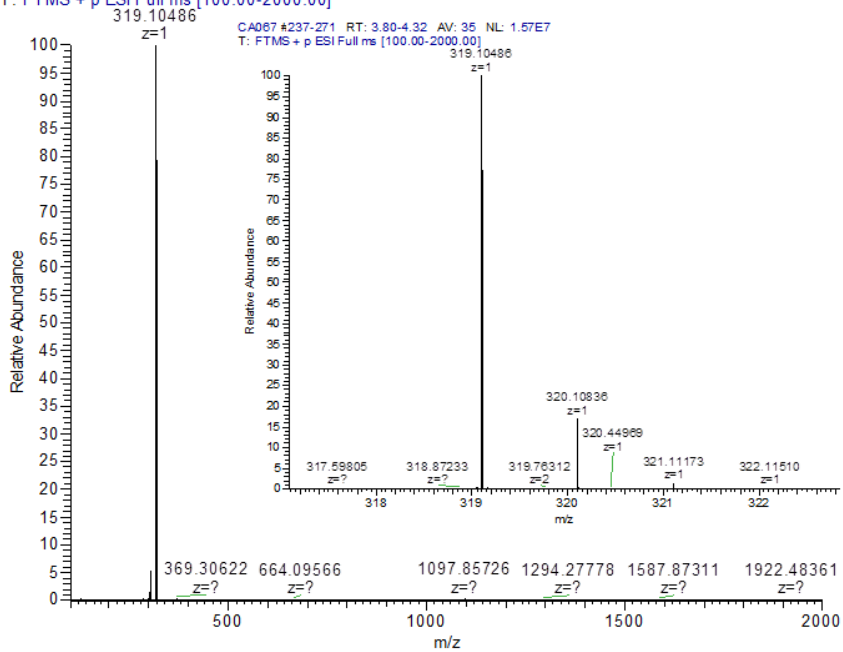

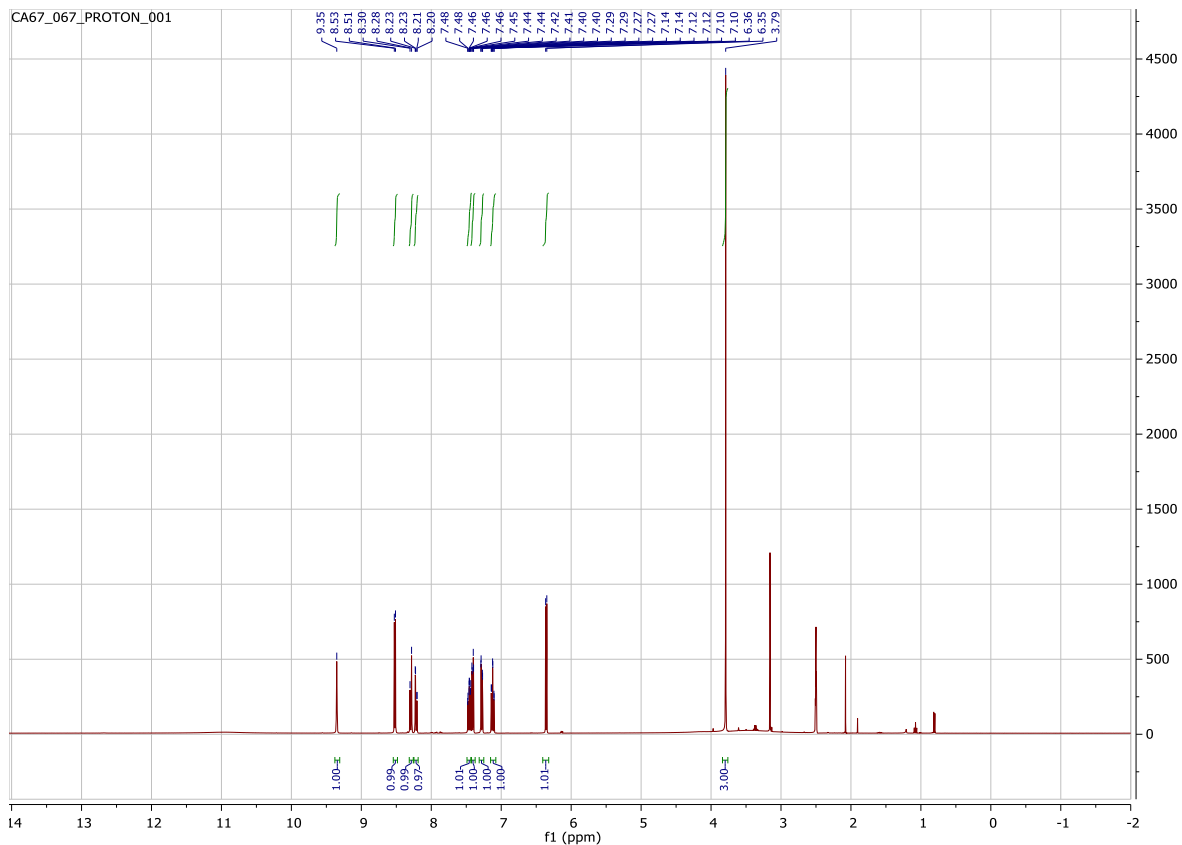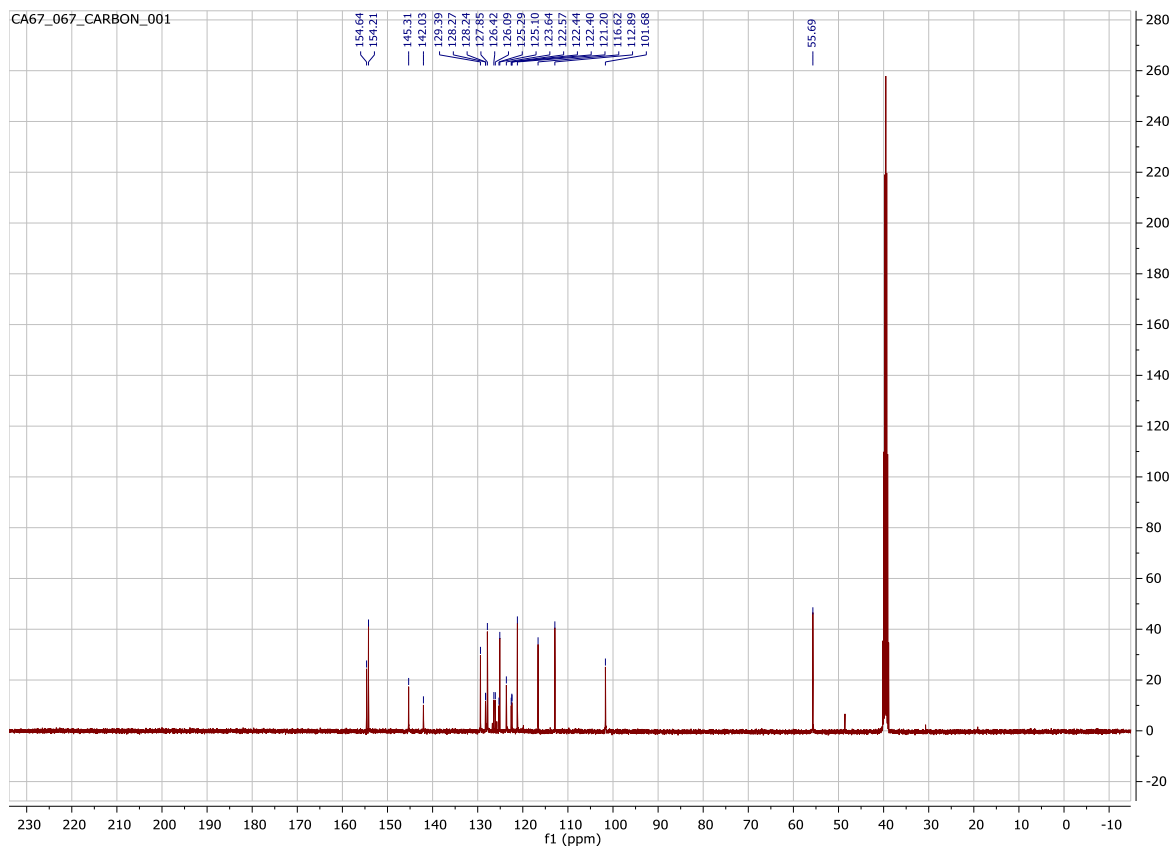

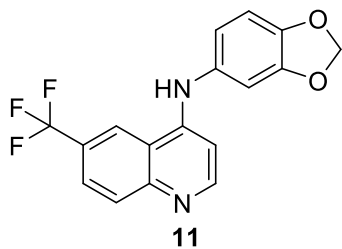

**N-(Benzo[d][1,3]dioxol-5-yl)-6-(trifluoromethyl)quinolin-4-amine (11)**

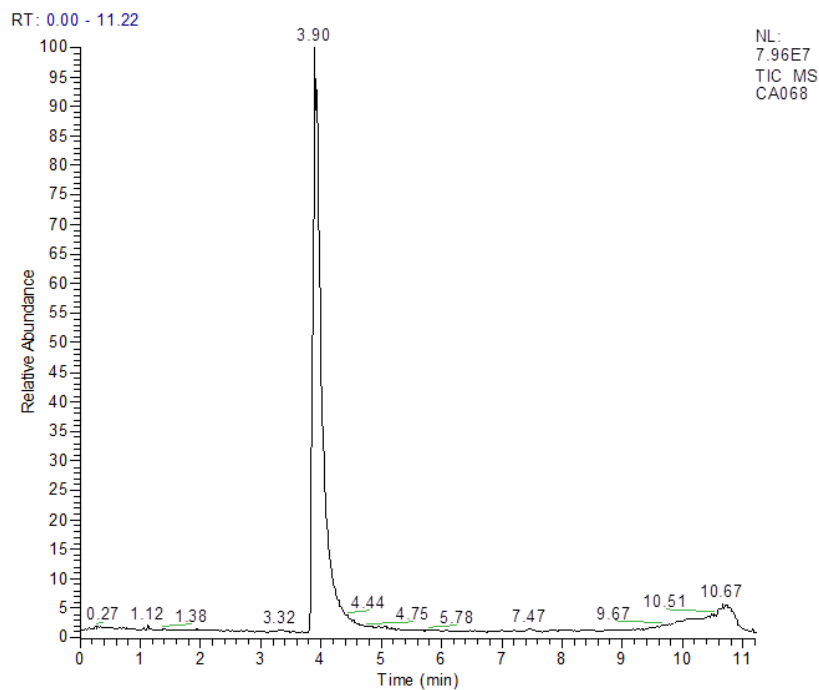

CA068 #233-258 RT: 3.74-4.12 AV: 26 NL: 1.83E7  
T: FTMS + p ESI Full ms [100.00-2000.00]

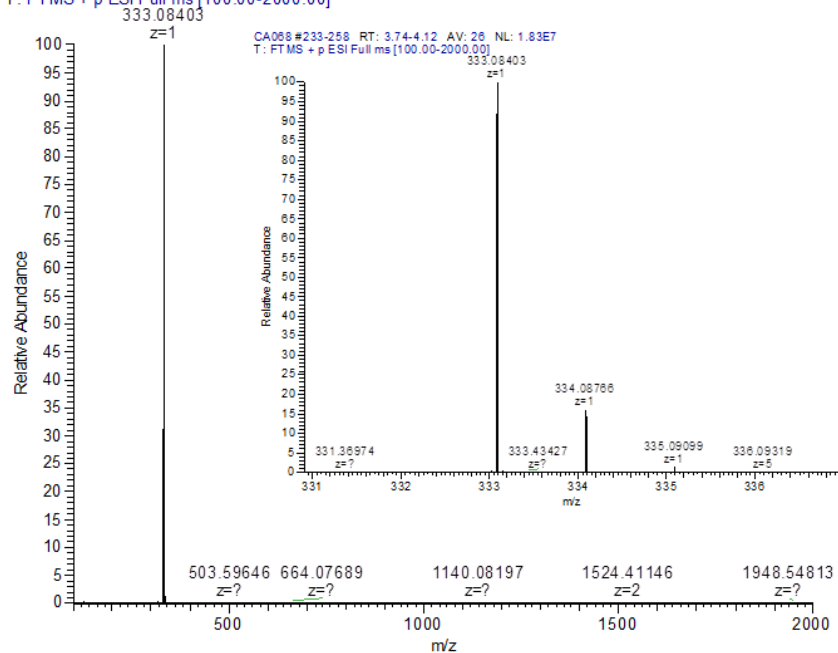

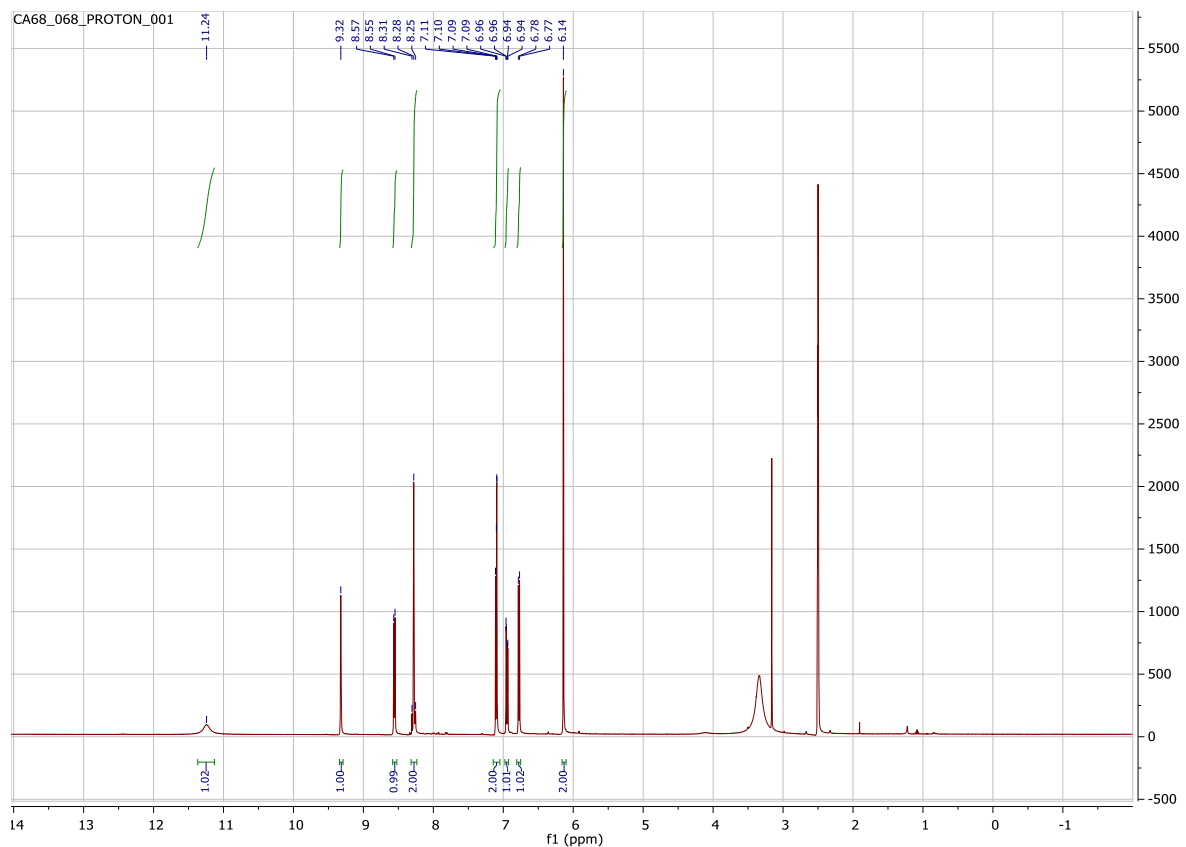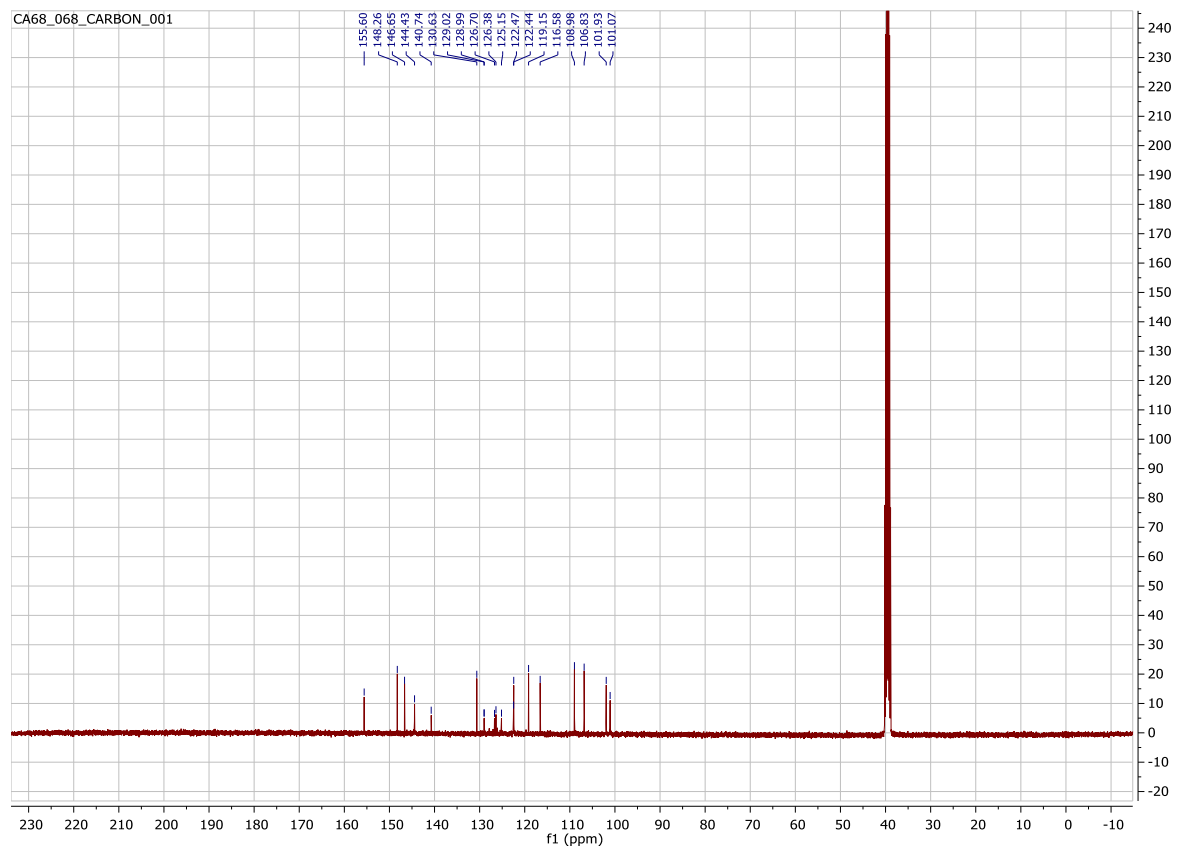



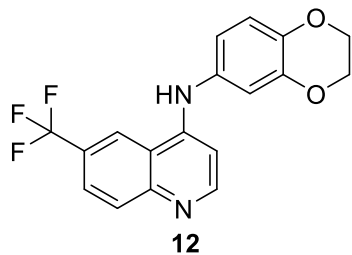

*N*-(2,3-Dihydrobenzo[*b*][1,4]dioxin-6-yl)-6-(trifluoromethyl)quinolin-4-amine (**12**)

RT: 0.00 - 11.23

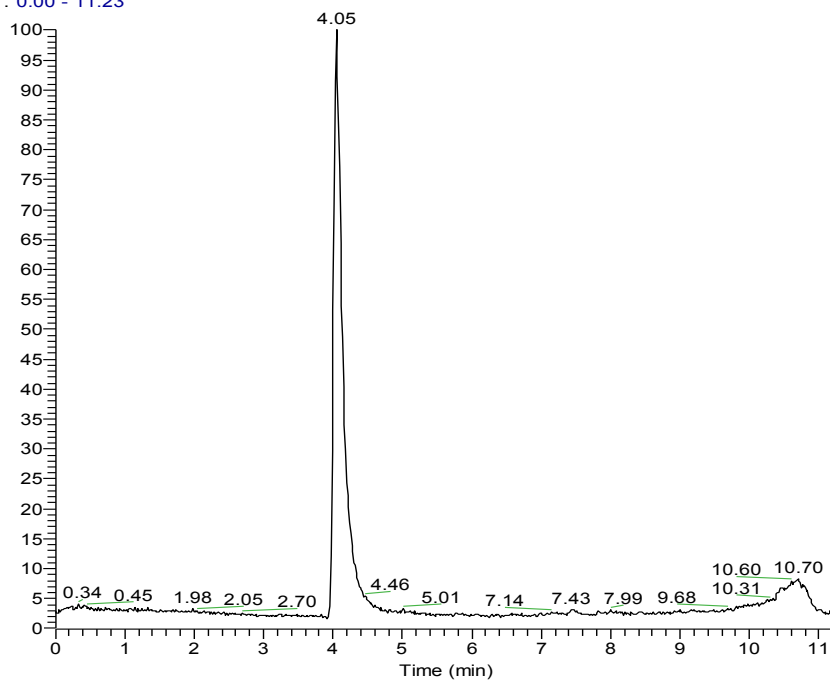

NL:  
4.67E7  
TIC MS  
CA069

CA069 #251-271 RT: 3.94-4.24 AV: 21 NL: 1.26E7  
T: FTMS + p ESI Full ms [100.00-2000.00]

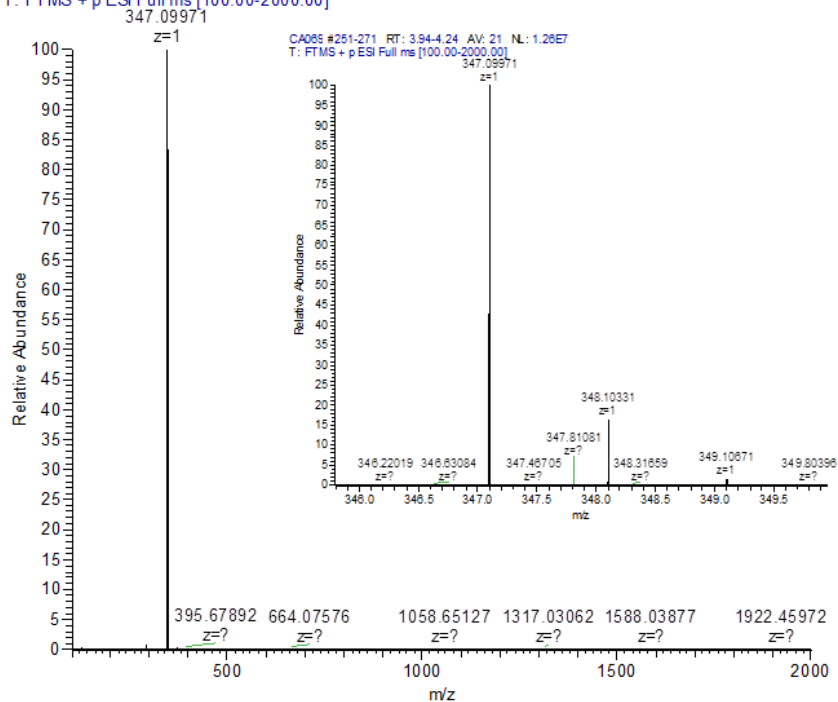

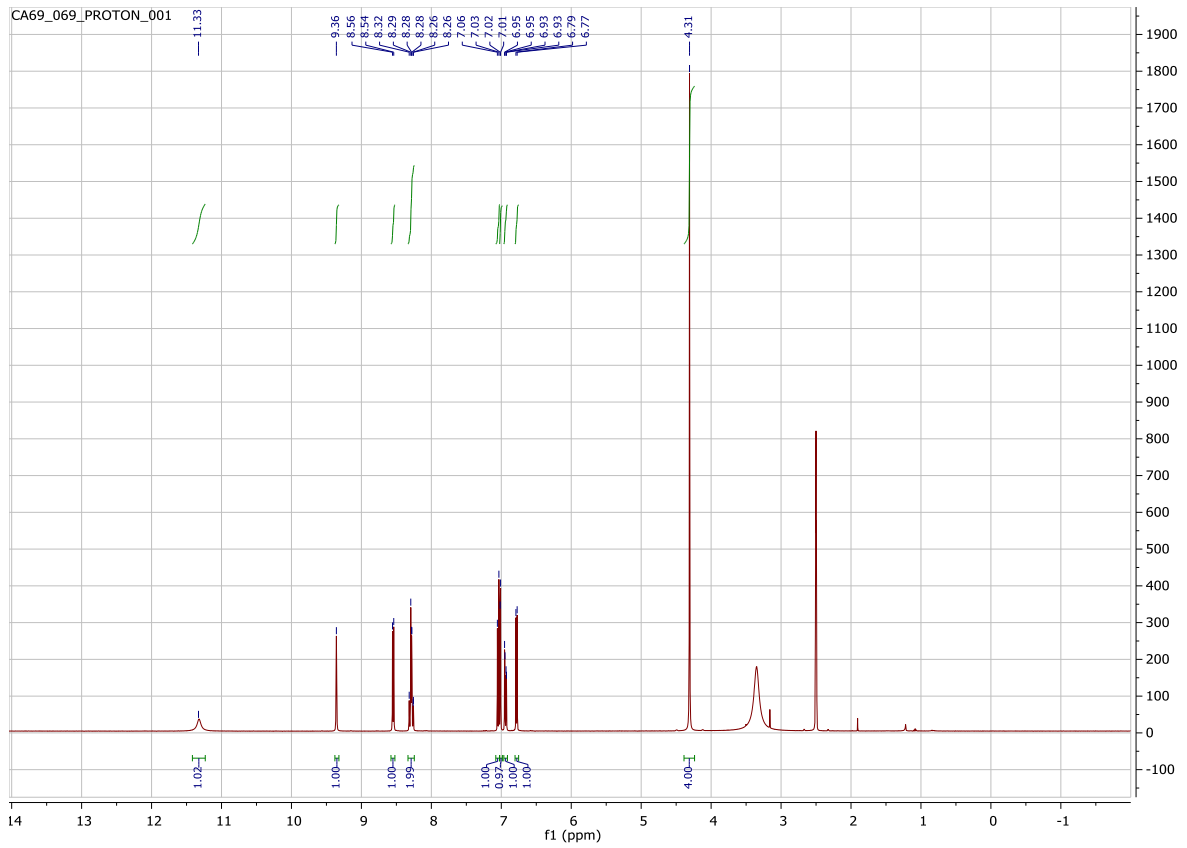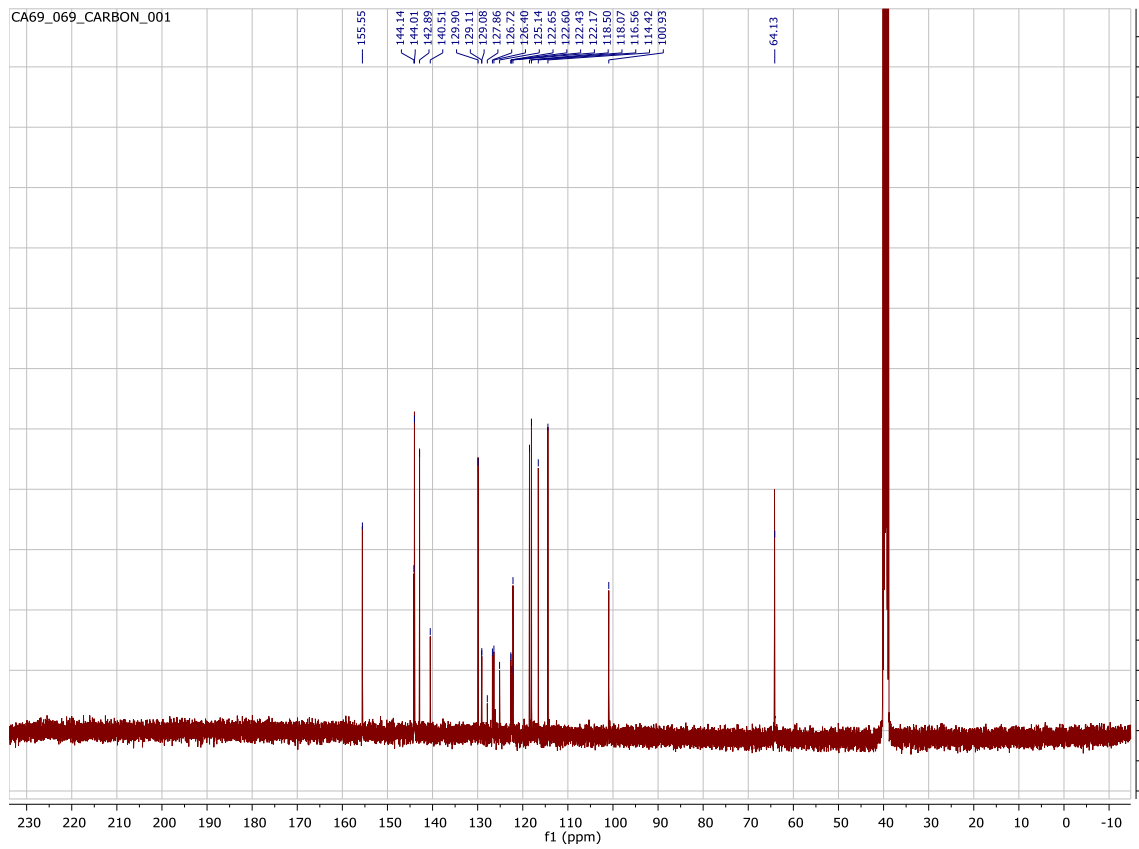

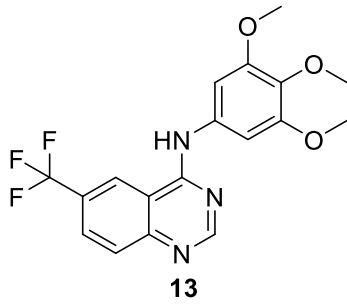

6-(Trifluoromethyl)-*N*-(3,4,5-trimethoxyphenyl)quinazolin-4-amine (**13**)

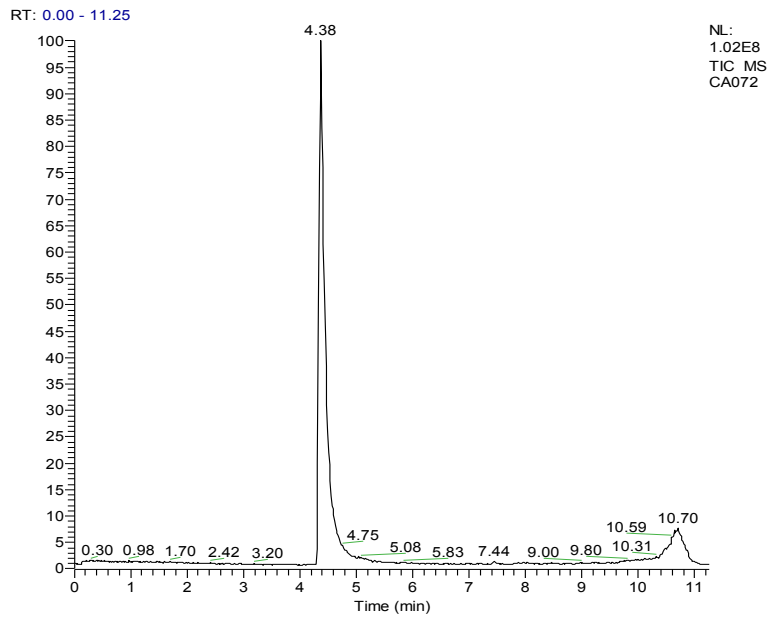

CA072 #263-289 RT: 4.19-4.59 AV: 27 NL: 1.88E7  
T: FTMS + p ESI Full ms [100.00-2000.00]

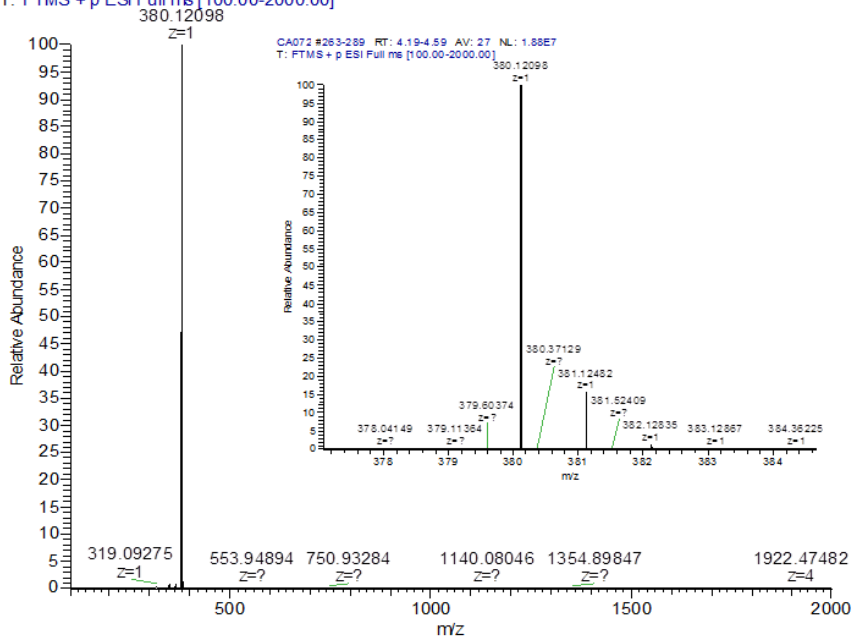

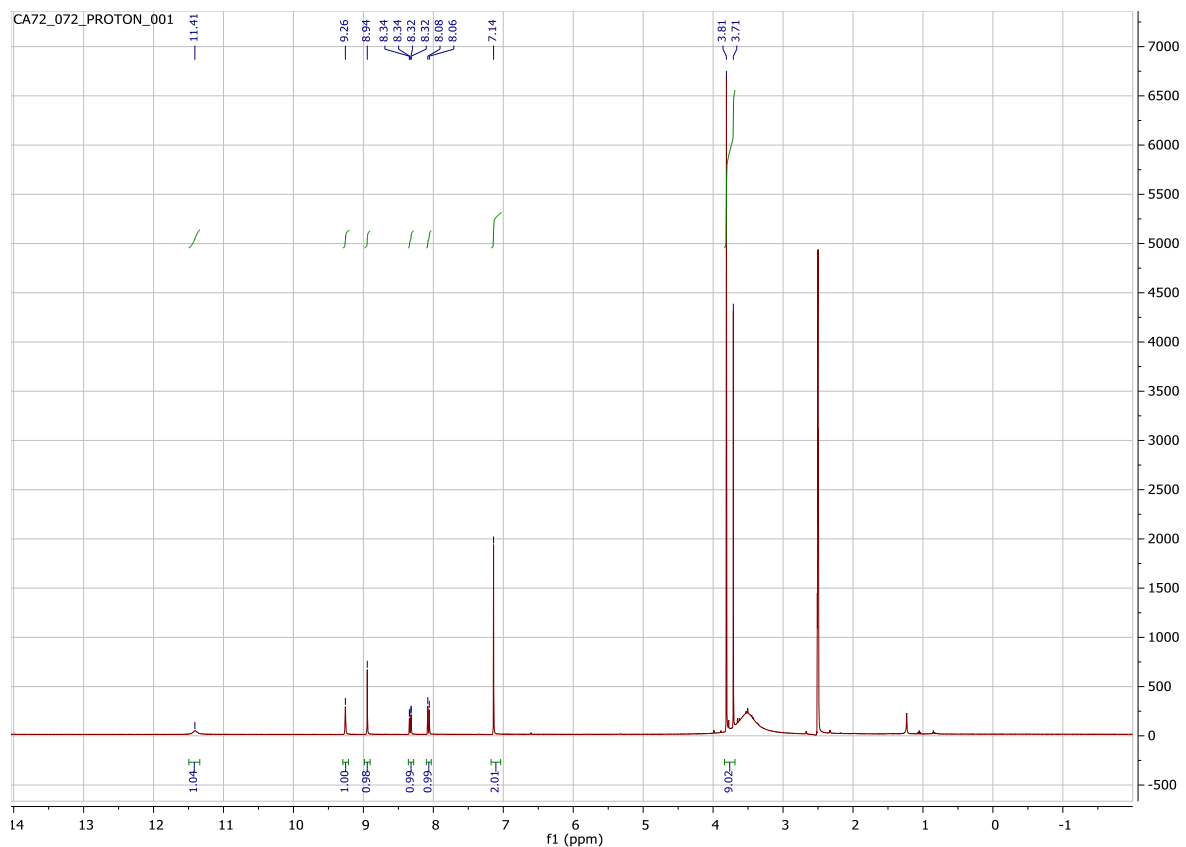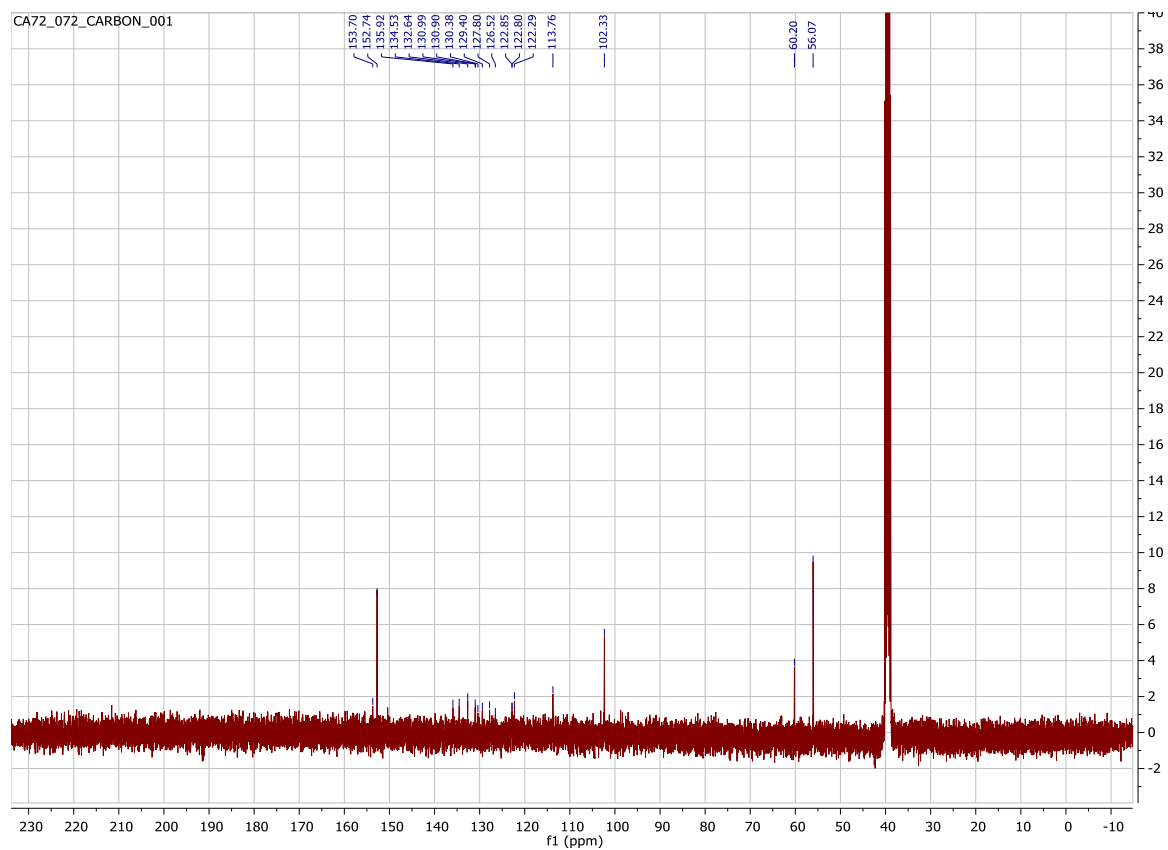

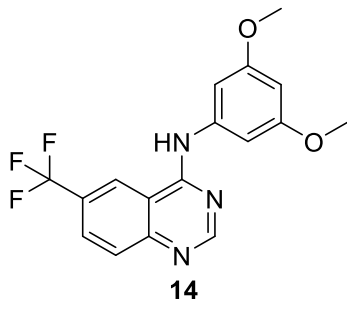

N-(3,5-Dimethoxyphenyl)-6-(trifluoromethyl)quinazolin-4-amine (**14**)

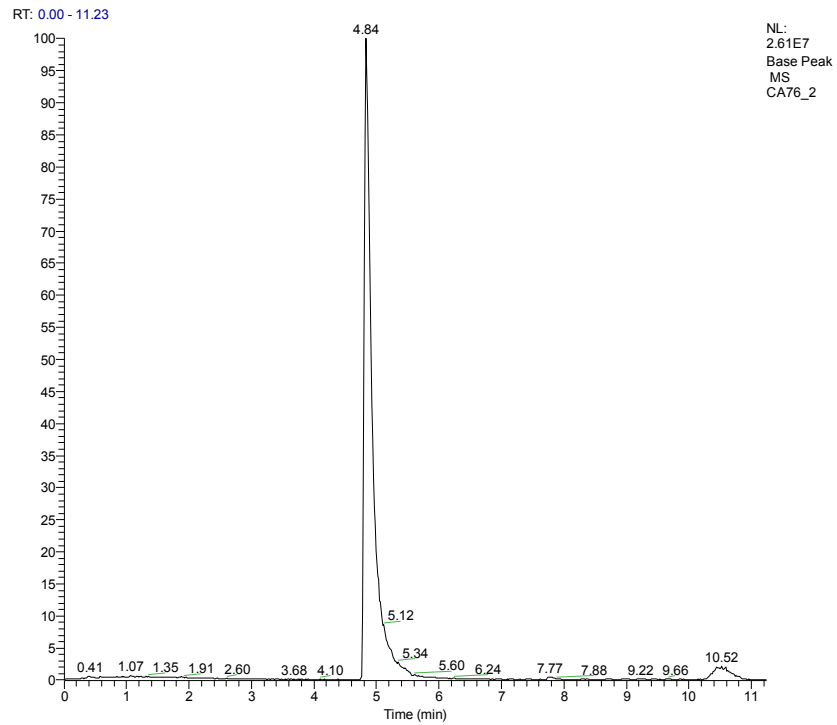

082216\_AG\_CA76\_CA\_Timwilson #1-100 RT: 0.00-1.47 AV: 100 NL: 3.81E6  
T: FTMS + p ESI Full ms [150.00-2000.00]

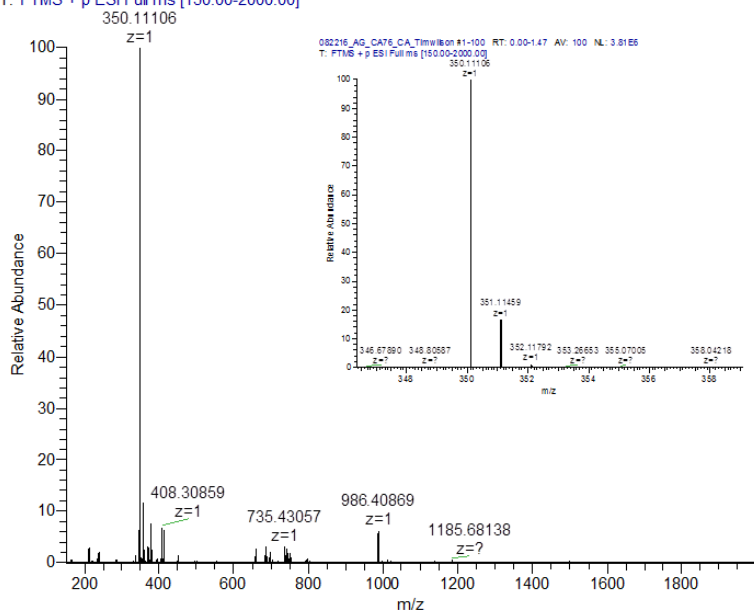

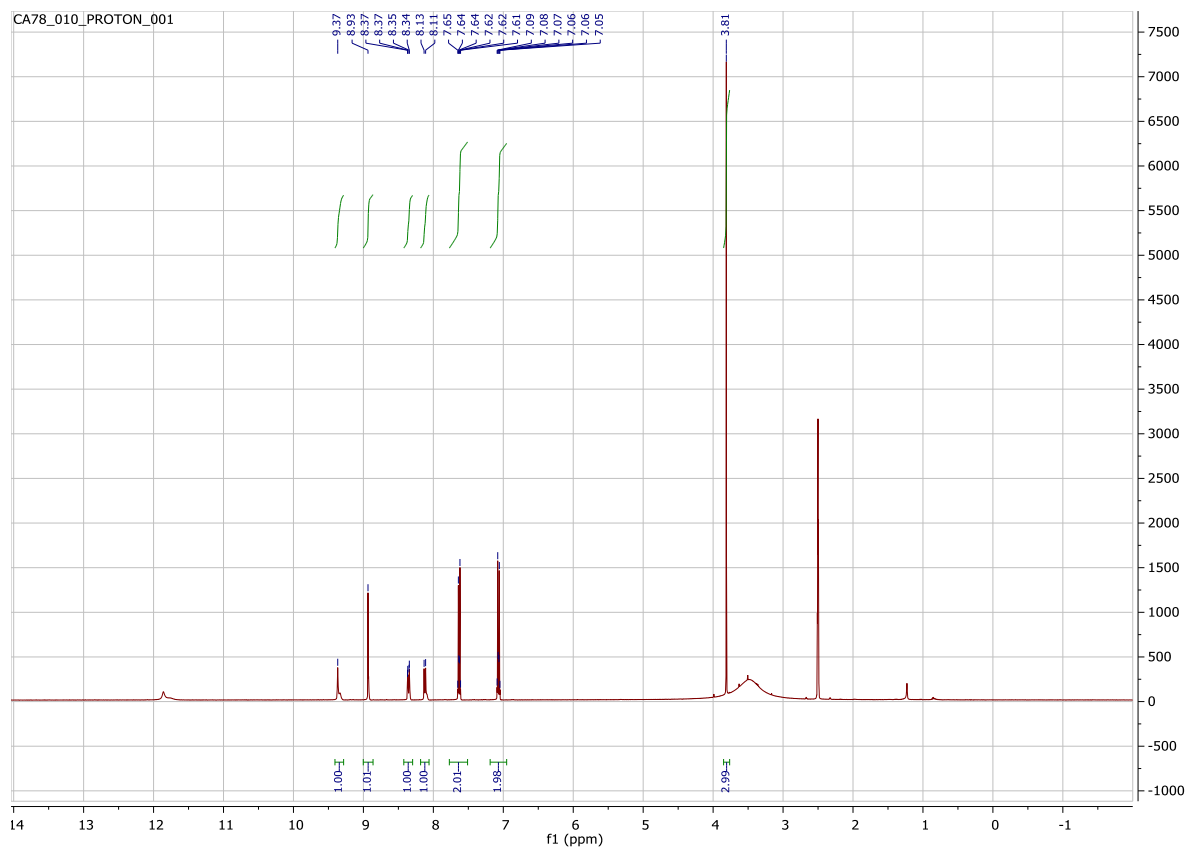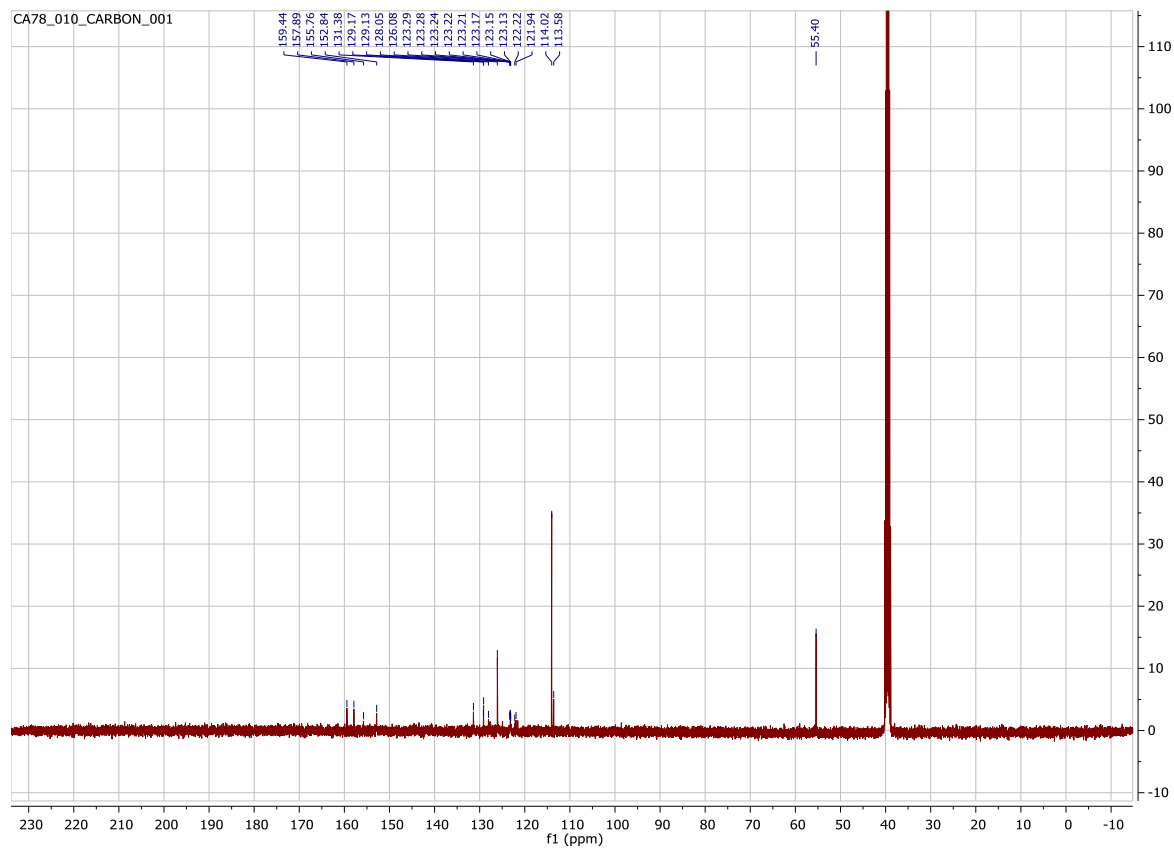

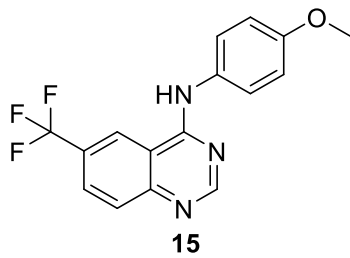

*N*-(4-Methoxyphenyl)-6-(trifluoromethyl)quinazolin-4-amine (**15**)

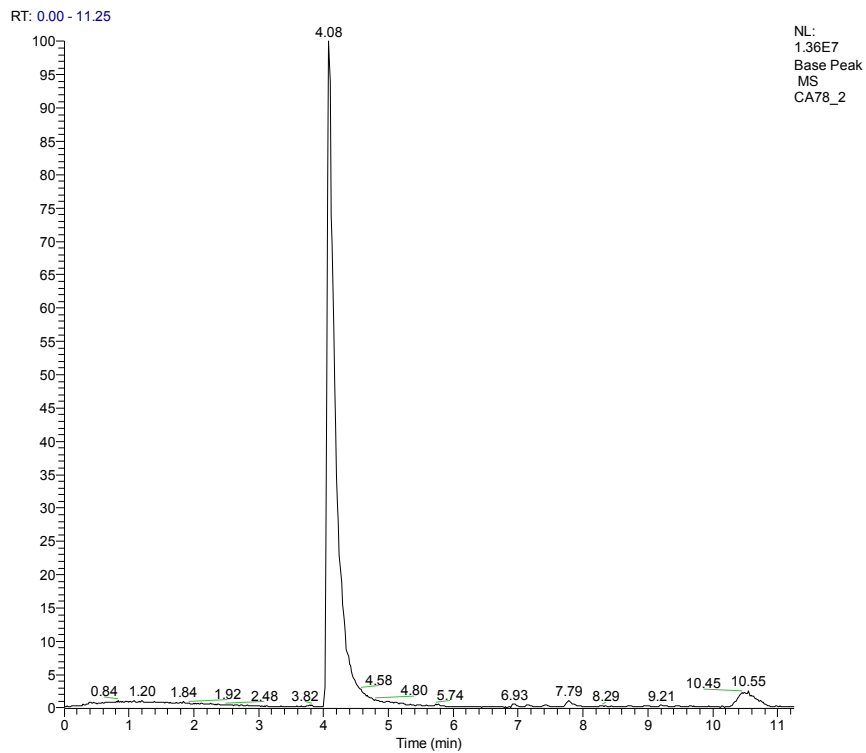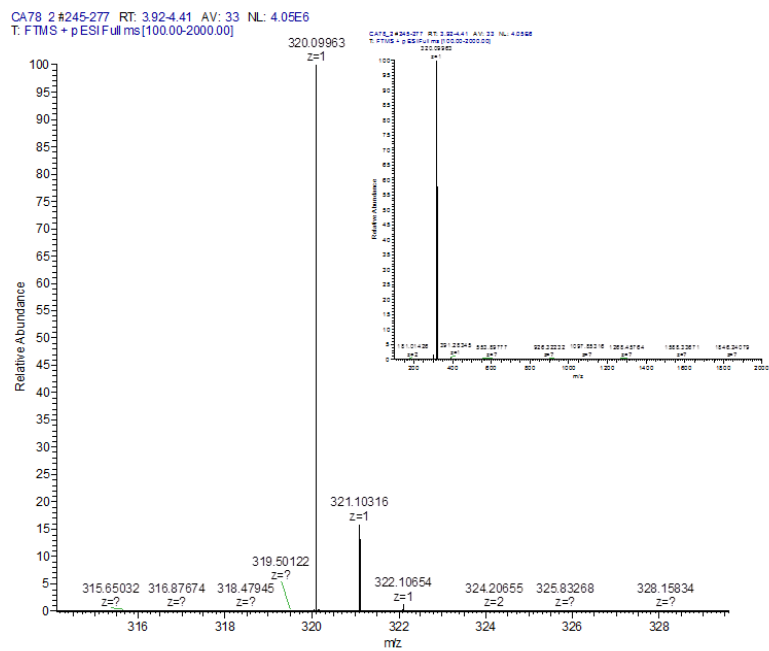

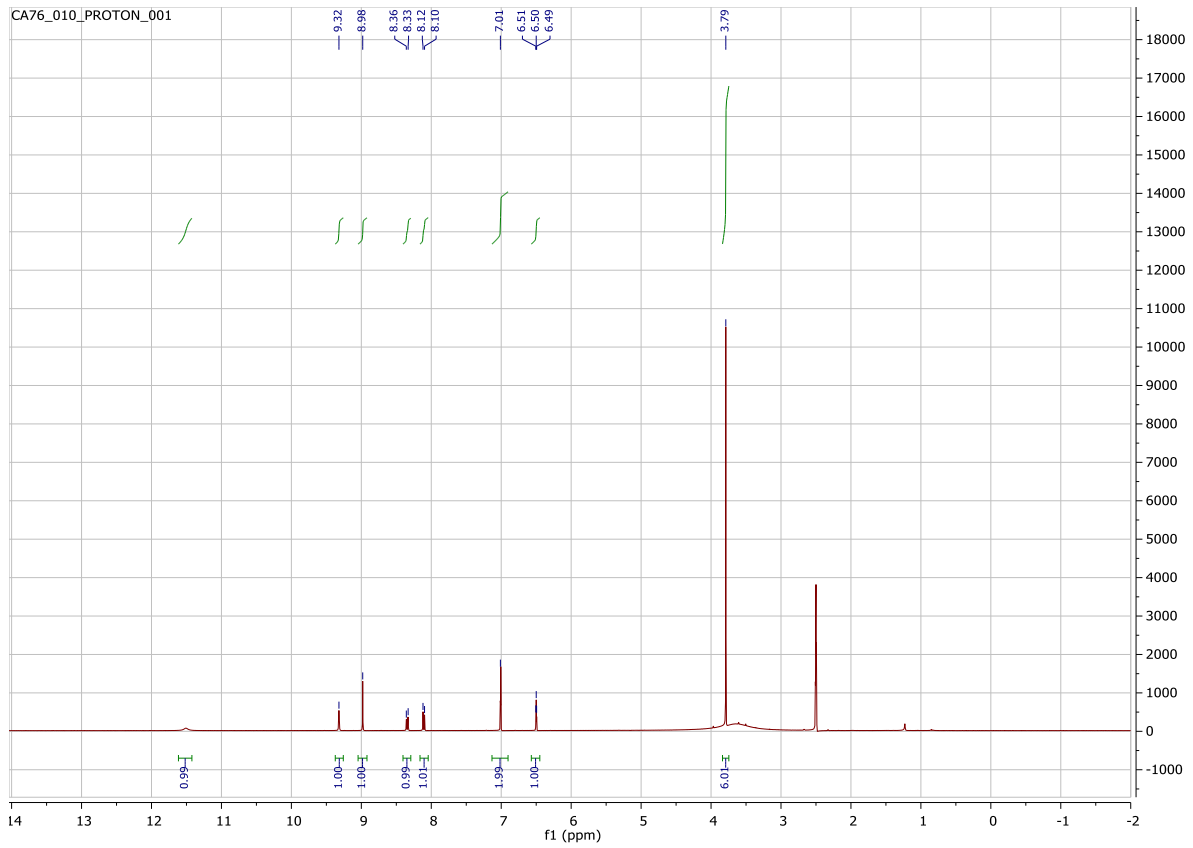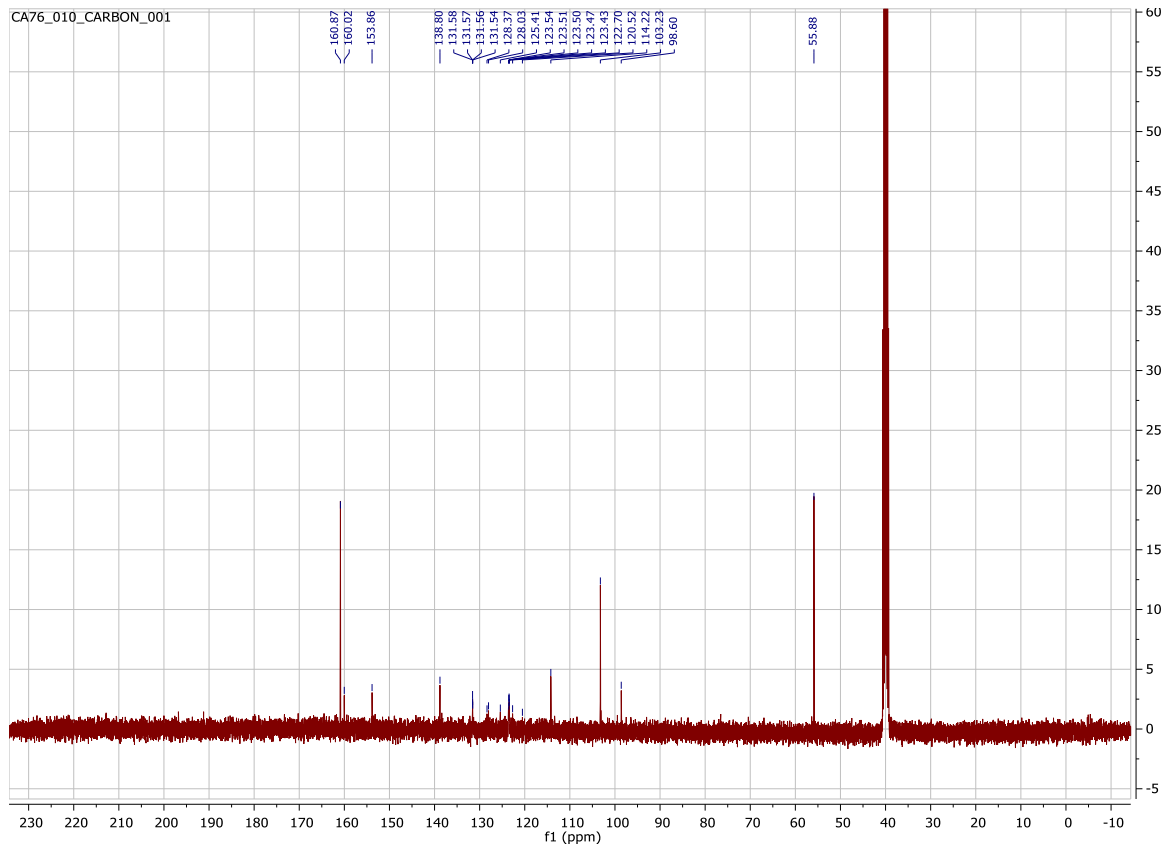



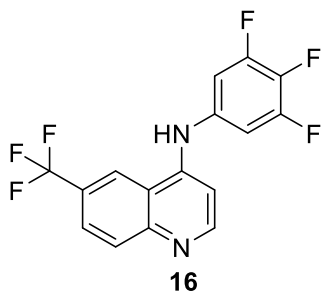

6-(Trifluoromethyl)-*N*-(3,4,5-trifluorophenyl)quinolin-4-amine (**16**)

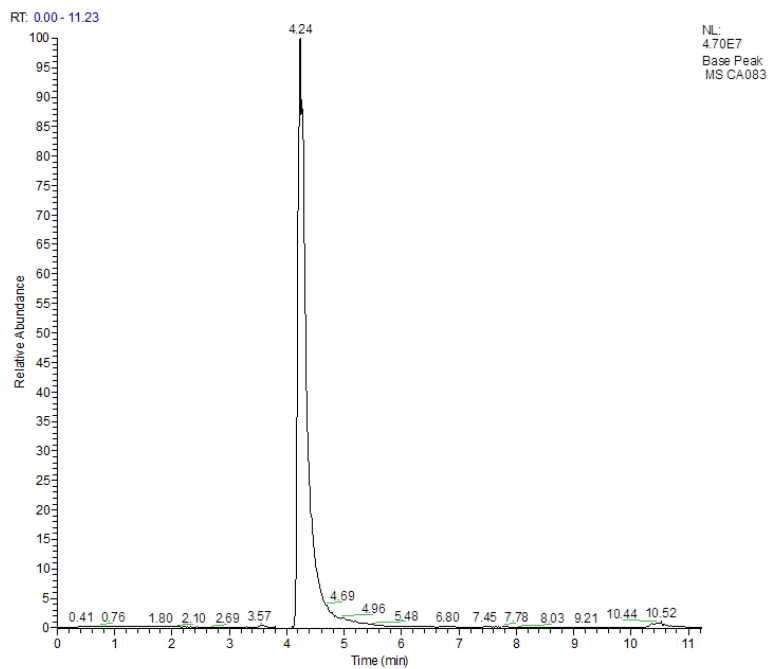

CA08: #253-292 RT: 4.05-4.65 AV: 40 NL: 1.33E7  
T: FTMS → p ESI Full ms [100.00-2000.00]

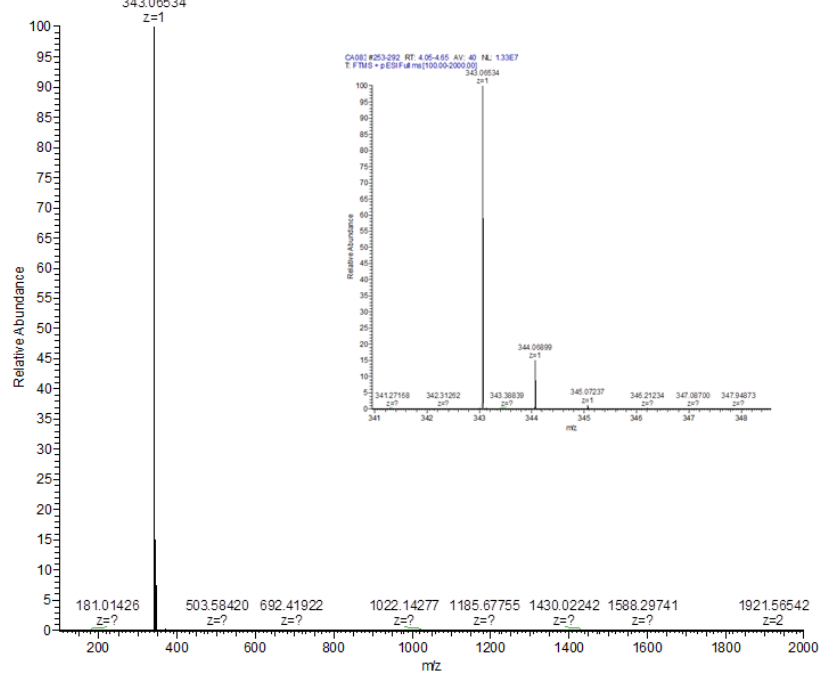

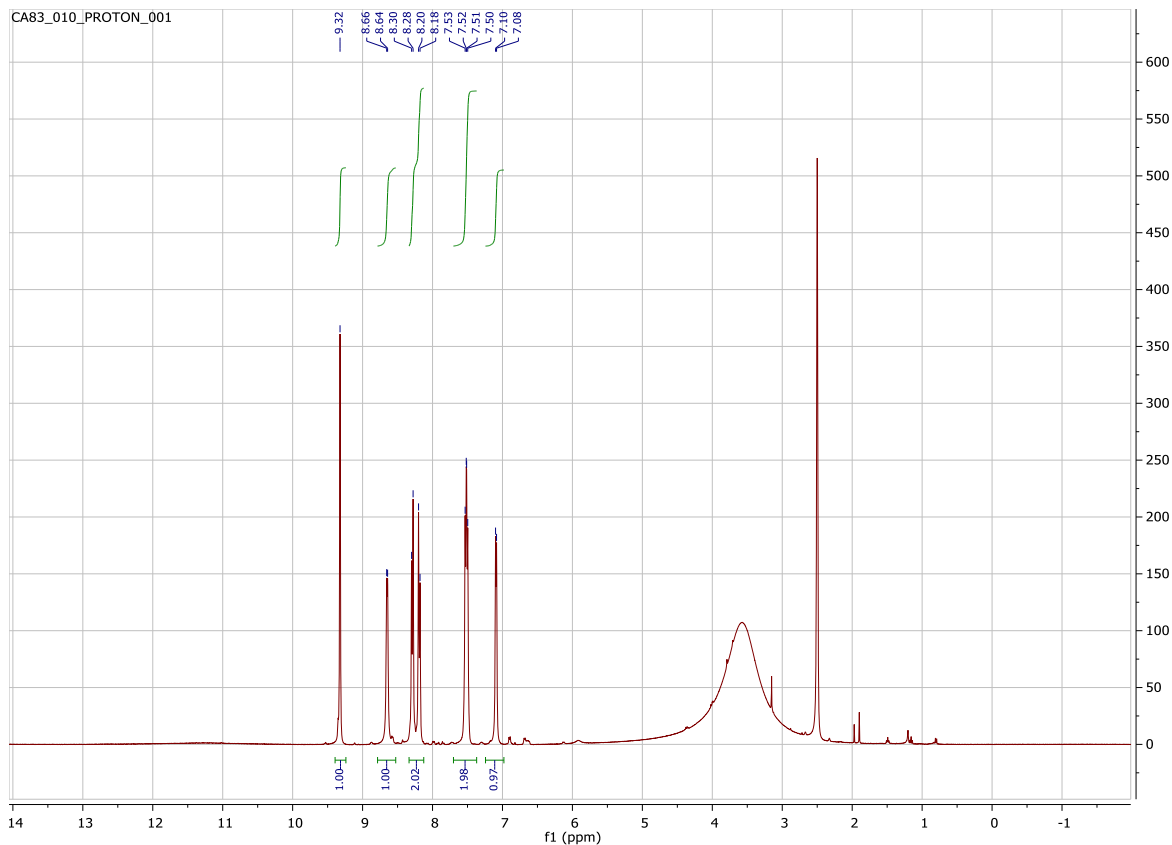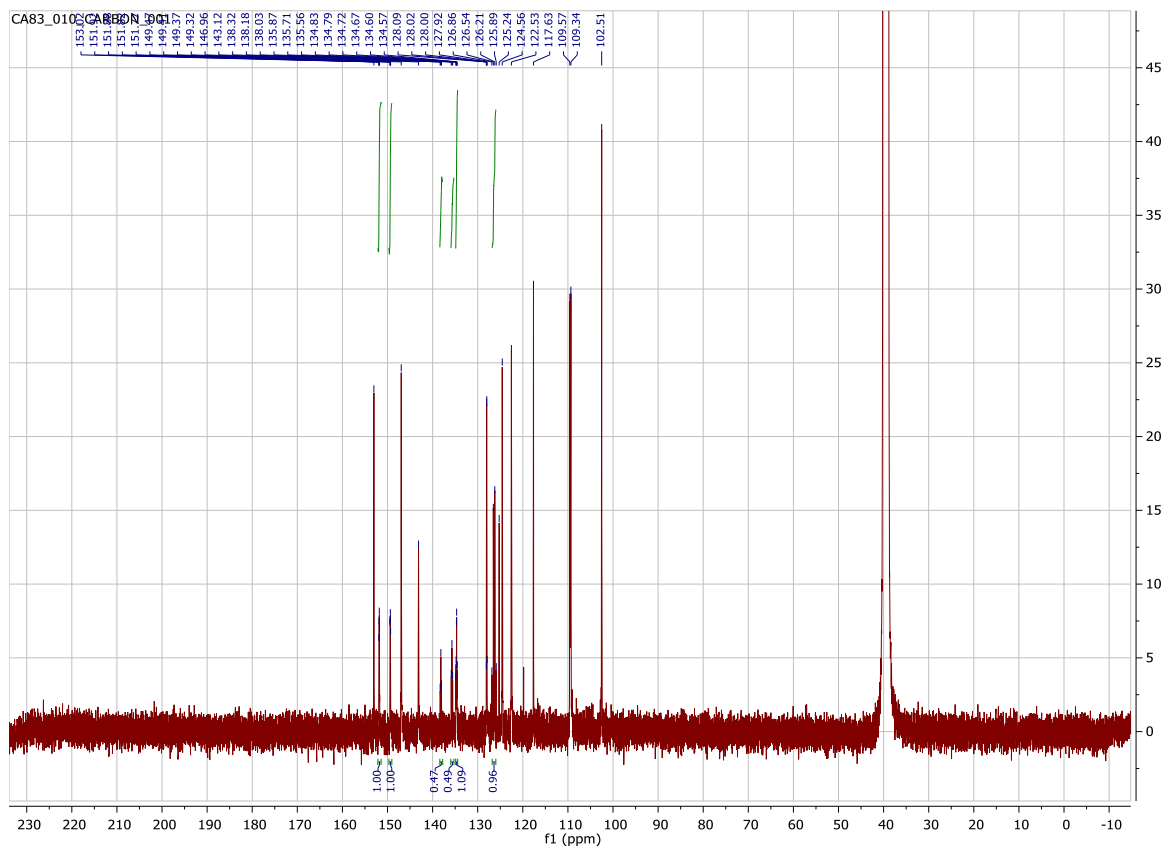

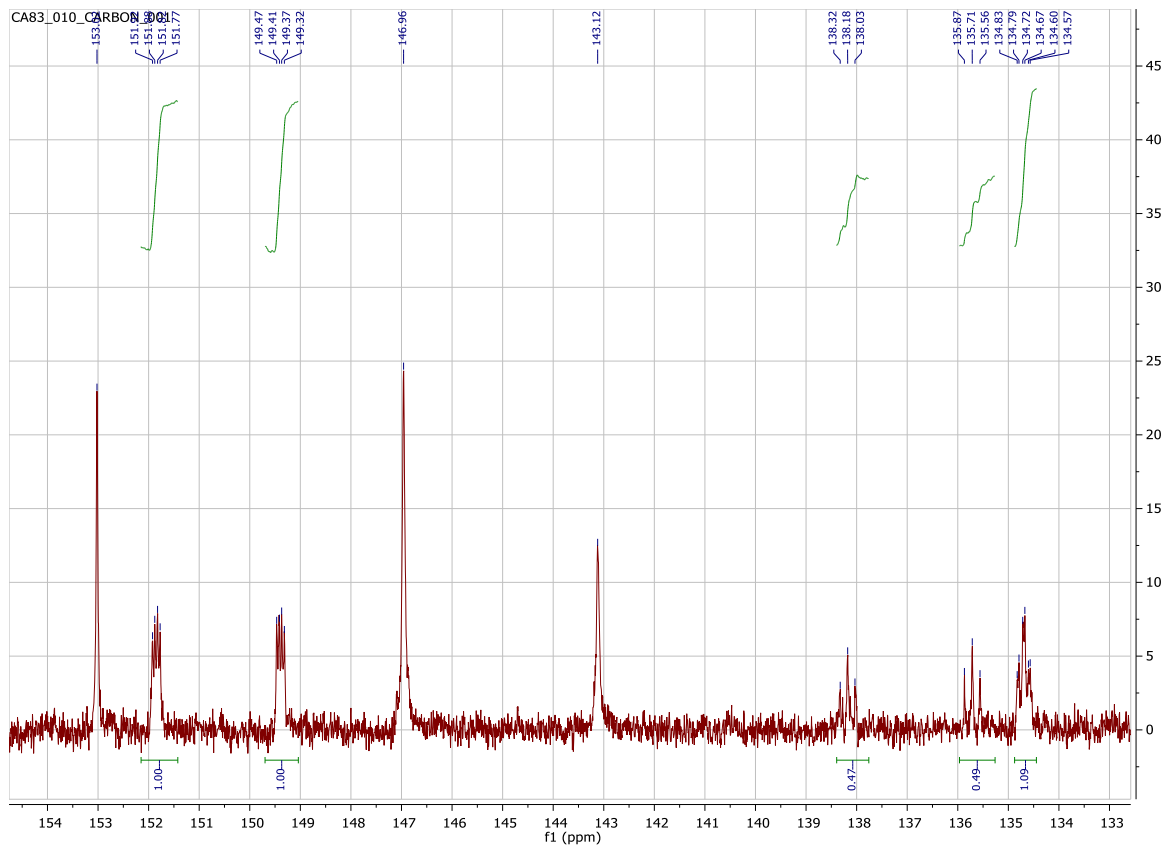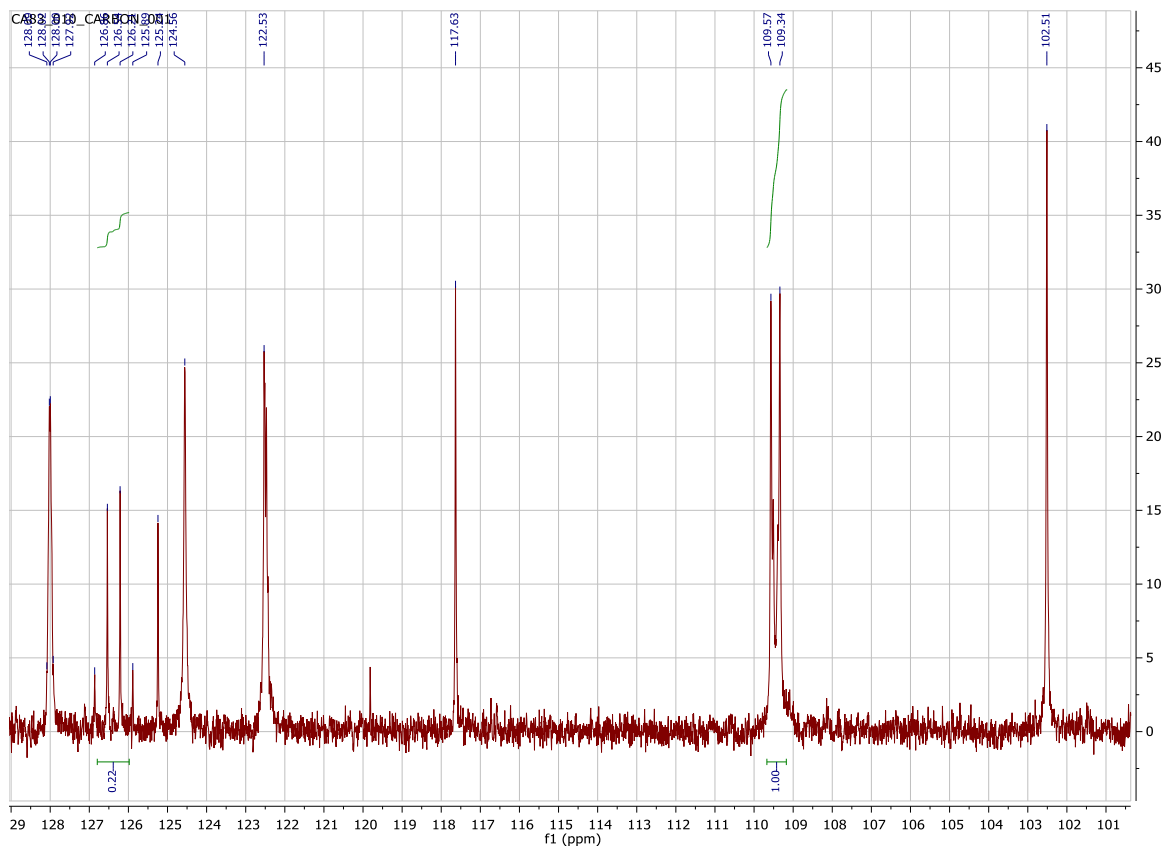

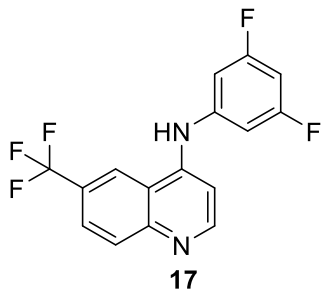

N-(3,5-Difluorophenyl)-6-(trifluoromethyl)quinolin-4-amine (**17**)

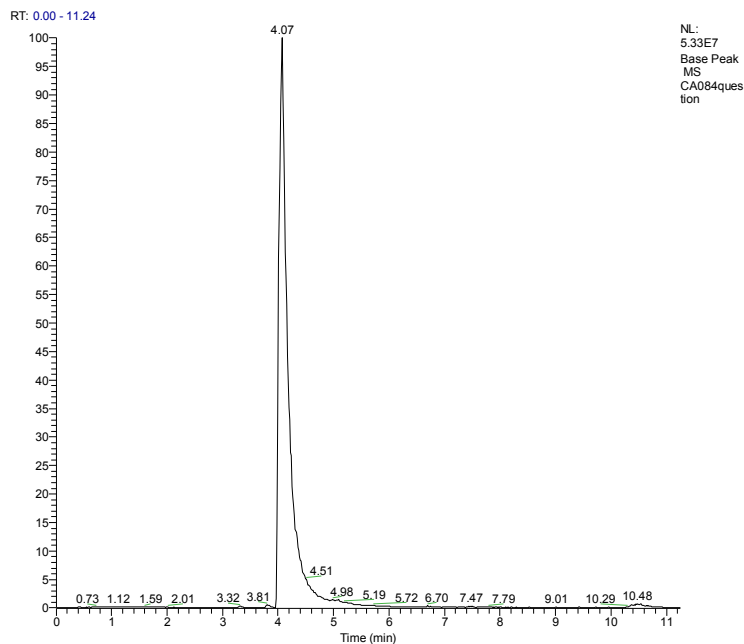

CA084question #237-279 RT: 3.81-4.45 AV: 43 NL: 1.52E7  
T: FTMS + p ESI Full ms [100.00-2000.00]

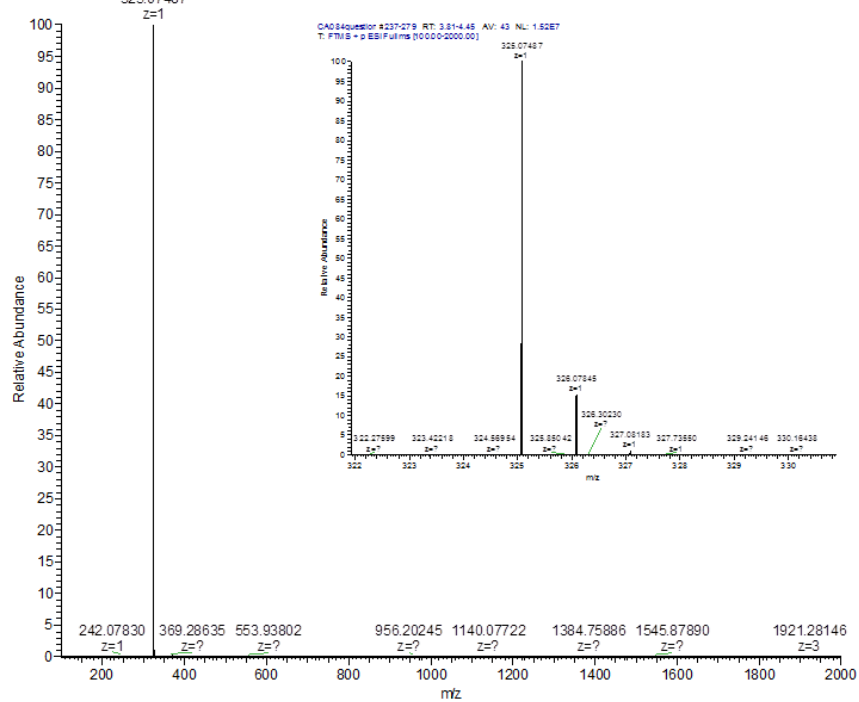

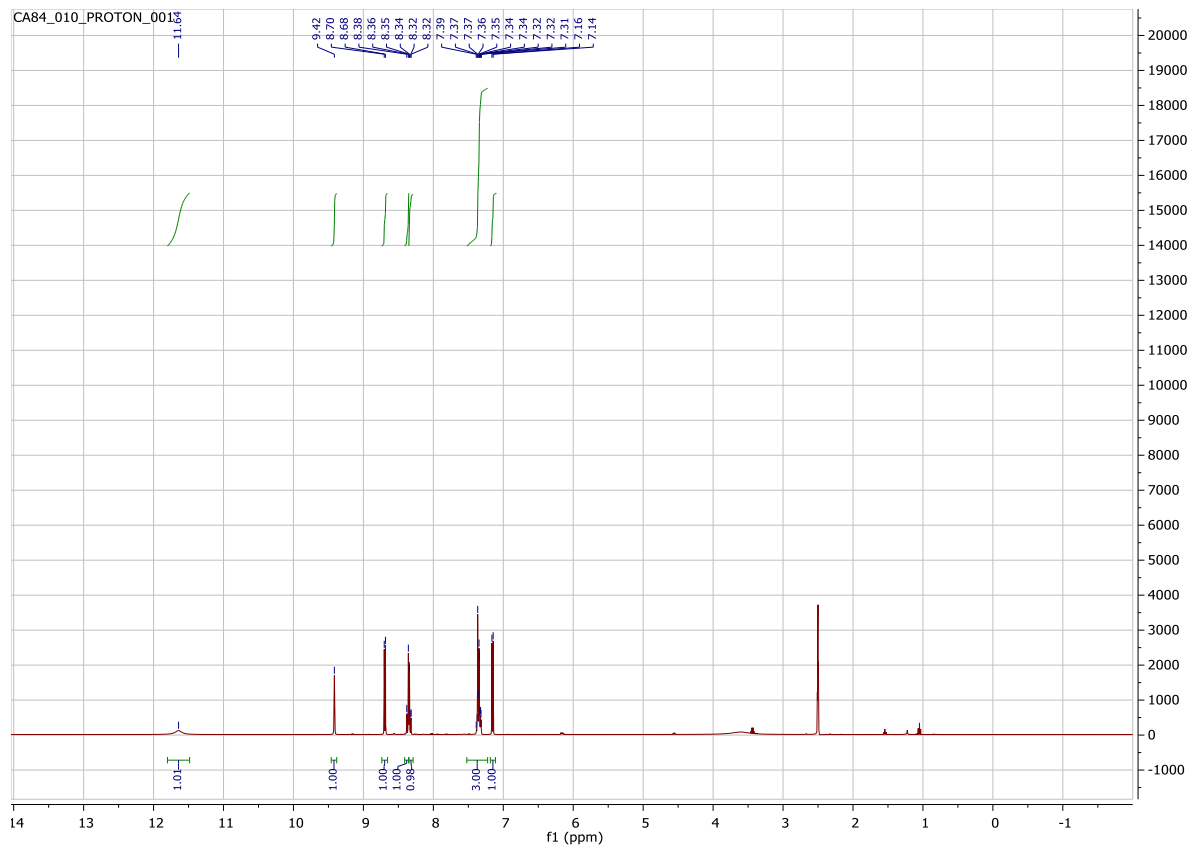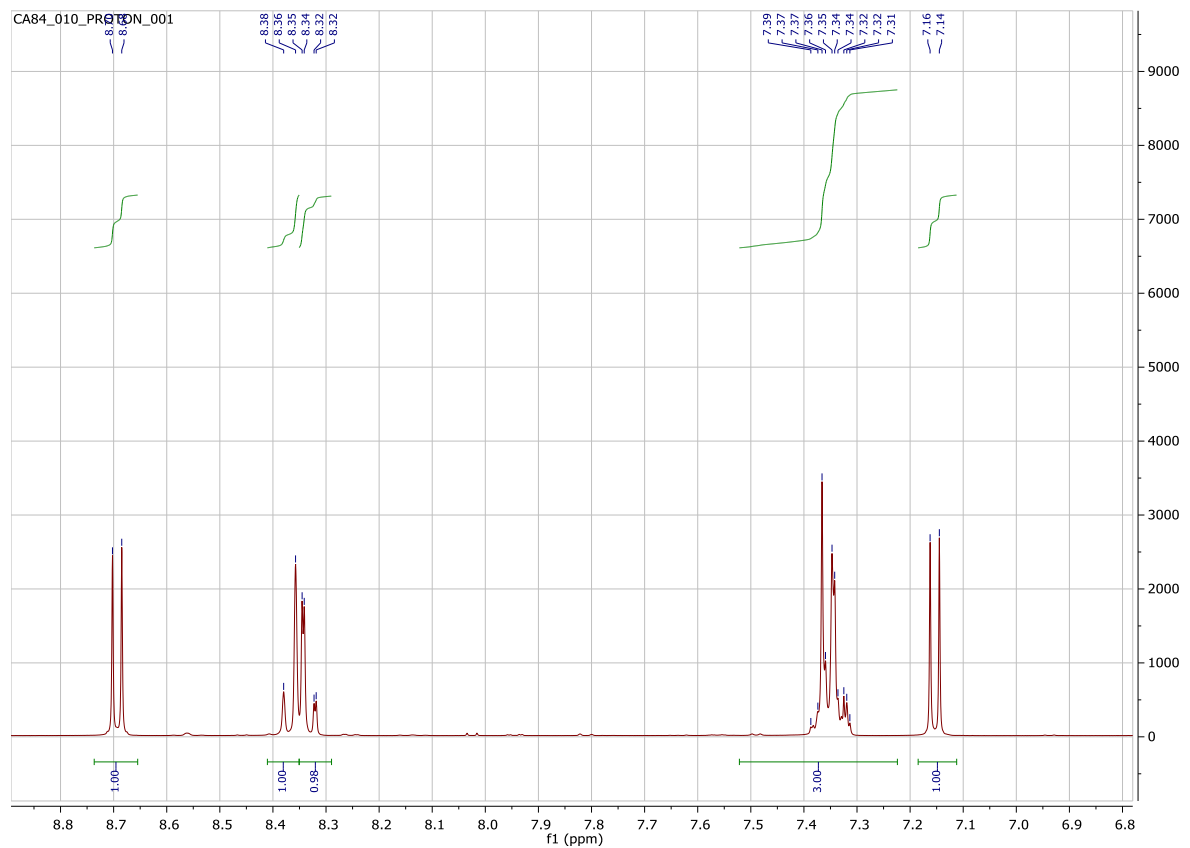

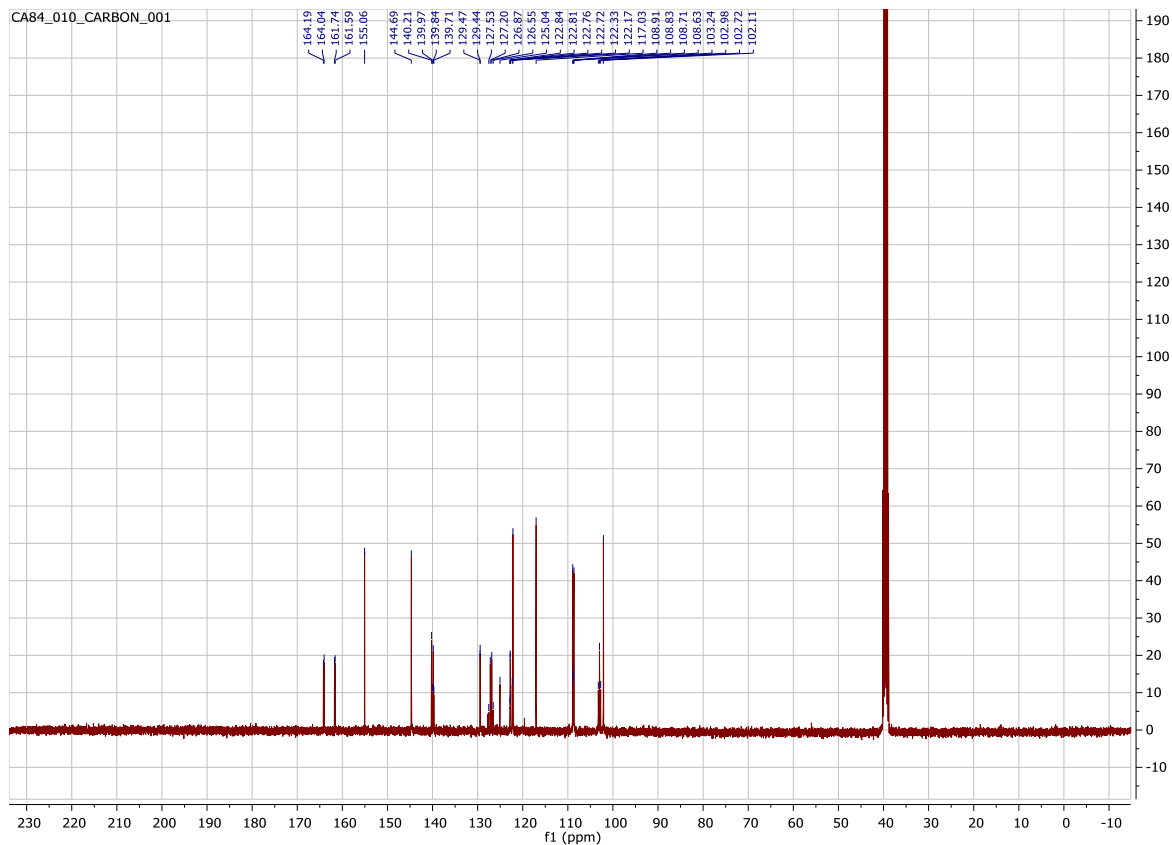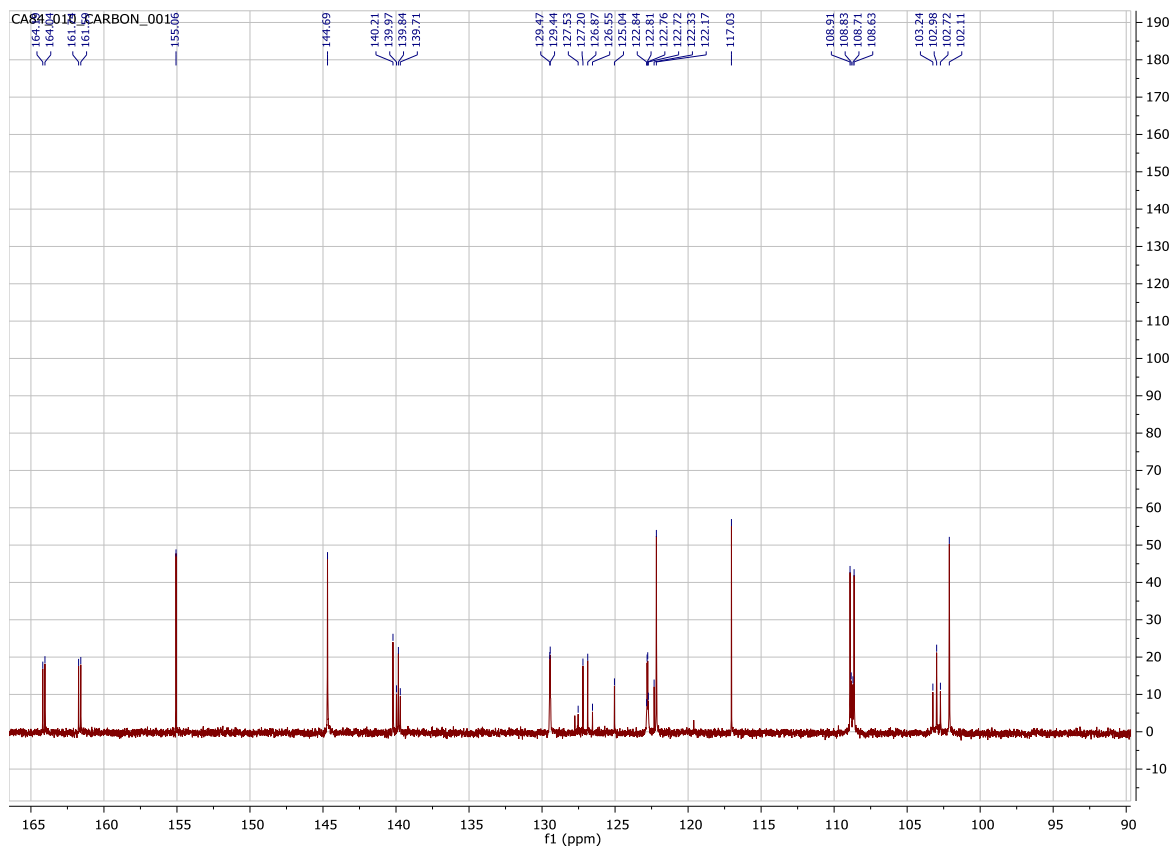

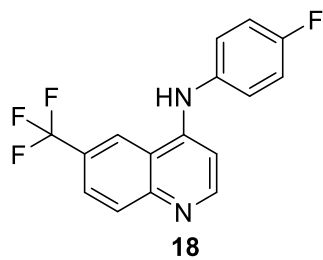

N-(4-Fluorophenyl)-6-(trifluoromethyl)quinolin-4-amine (**18**)

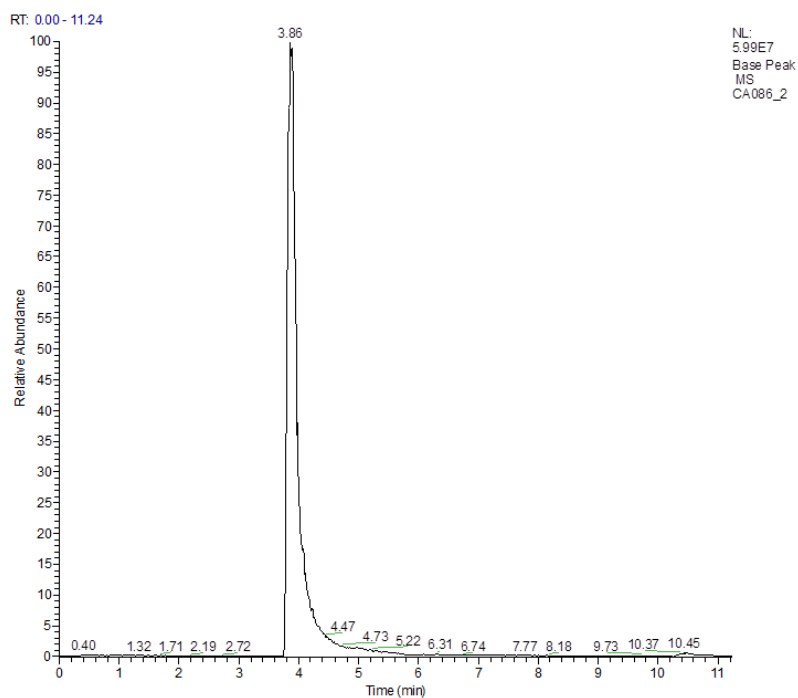

CA086\_2 #227-256 RT: 3.66-4.10 AV: 30 NL: 2.24E7  
T: FTMS + pESI Full ms [100.00-2000.00]

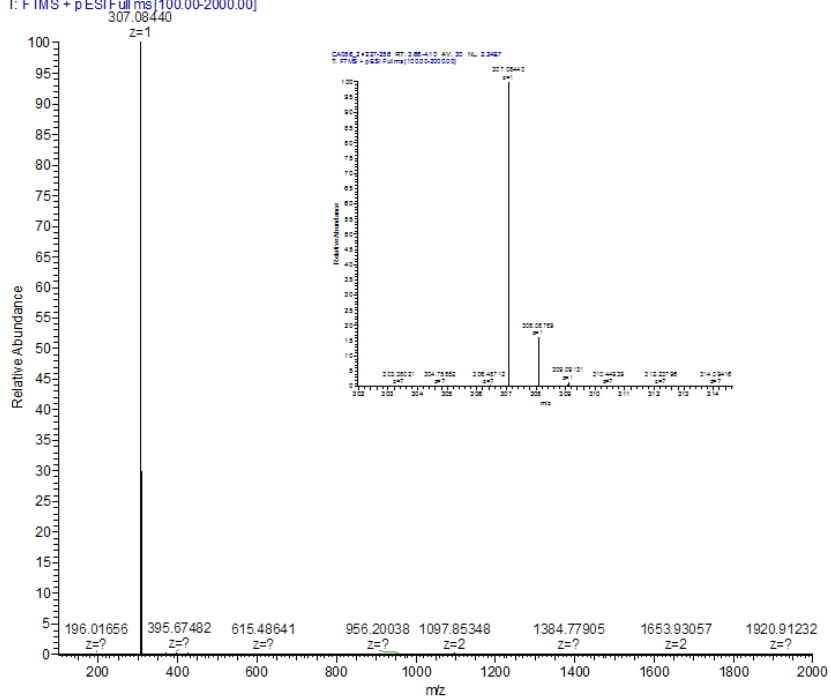

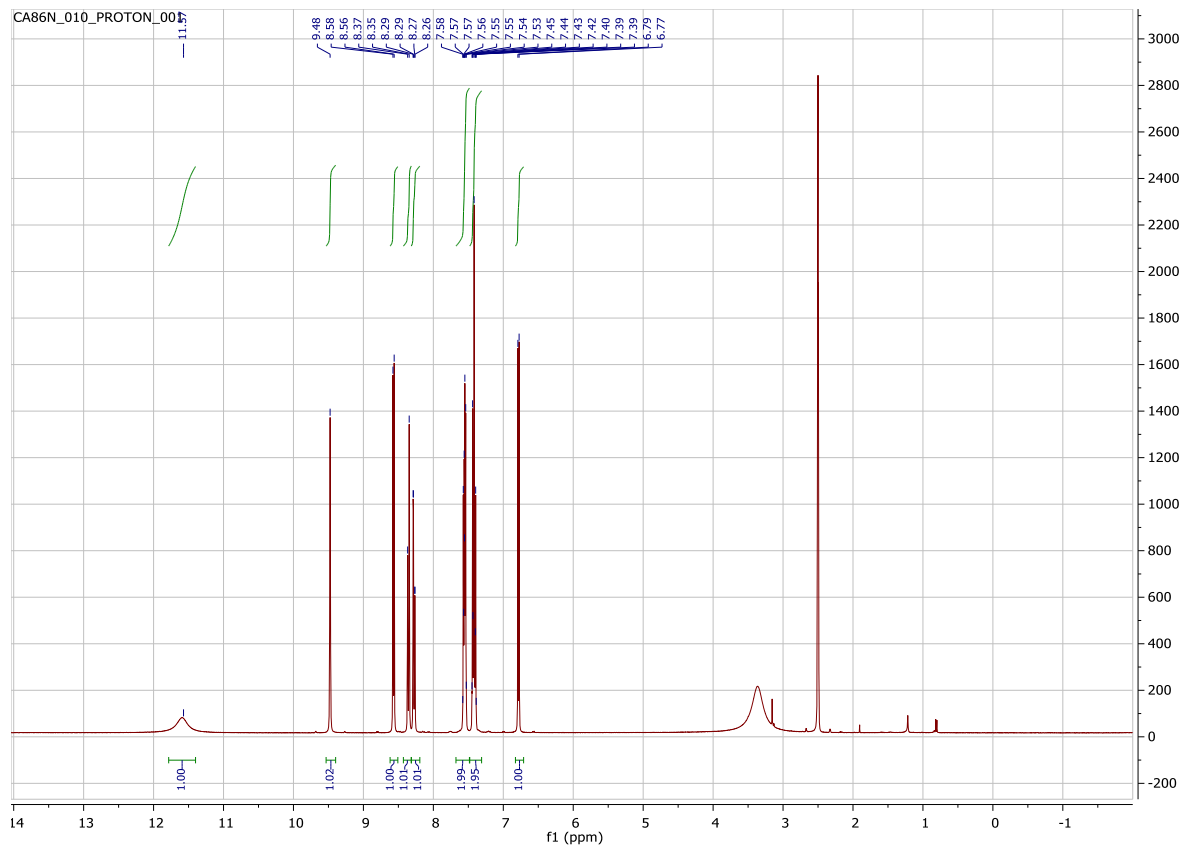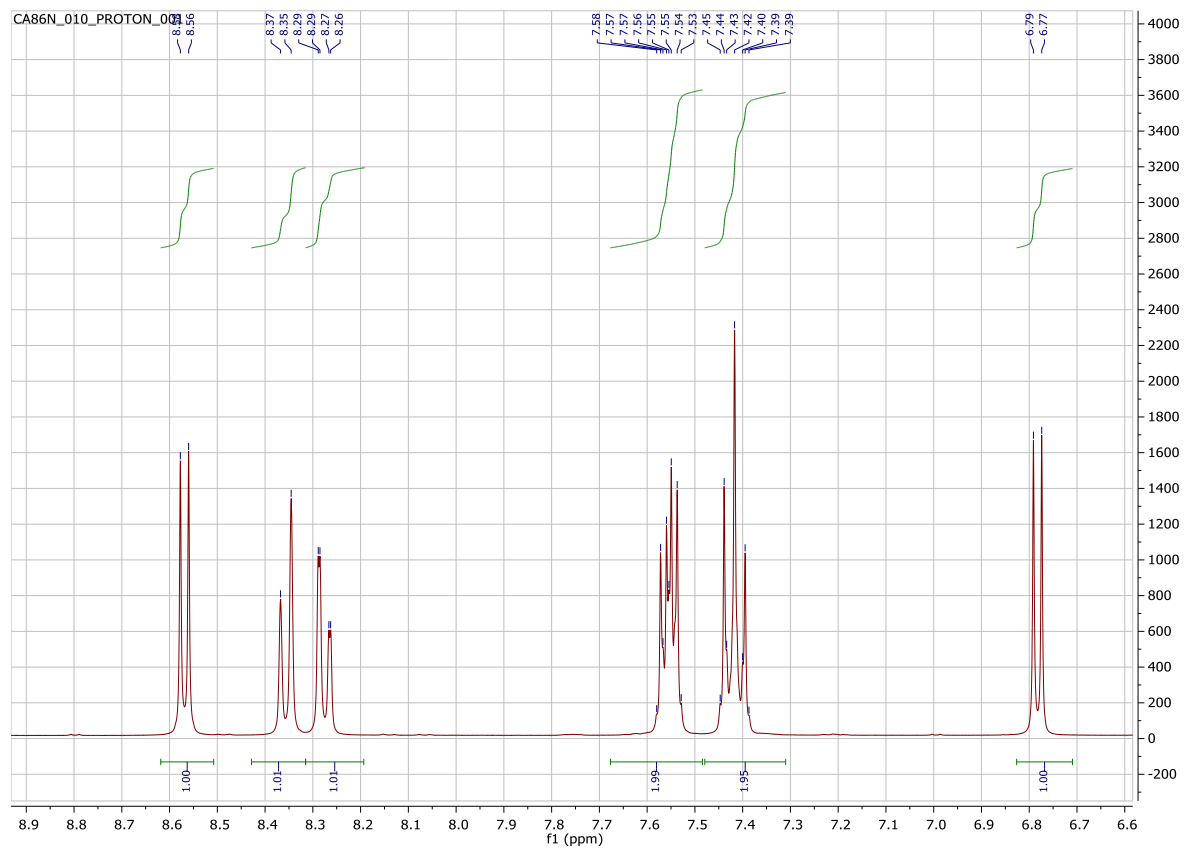



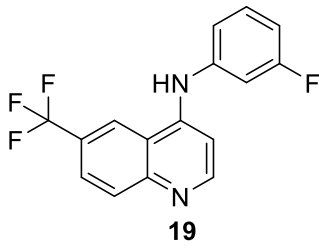

**N-(3-Fluorophenyl)-6-(trifluoromethyl)quinolin-4-amine (19)**

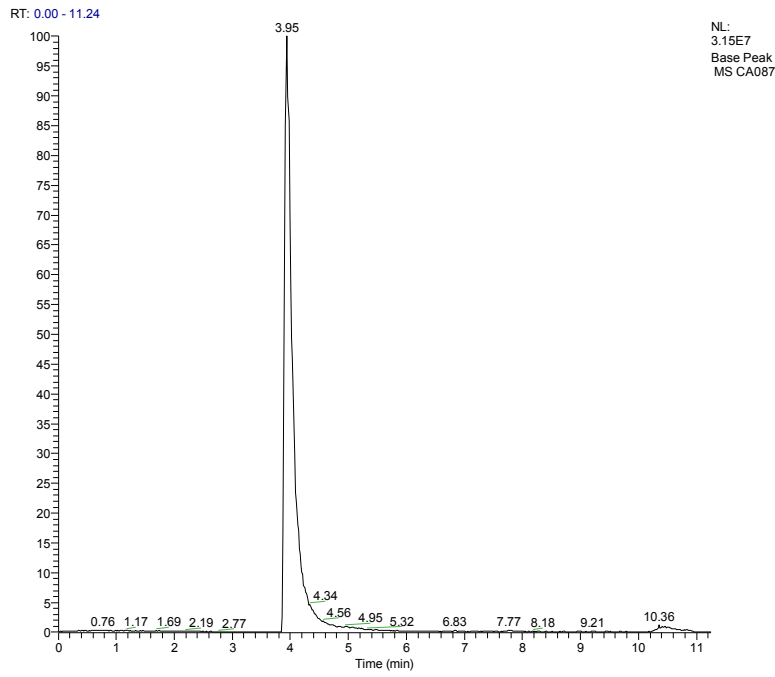

CA087 #233-266 RT: 3.76-4.26 AV: 34 NL: 9.52E6  
T: FTMS + p ESI Full ms [100.00-2000.00]

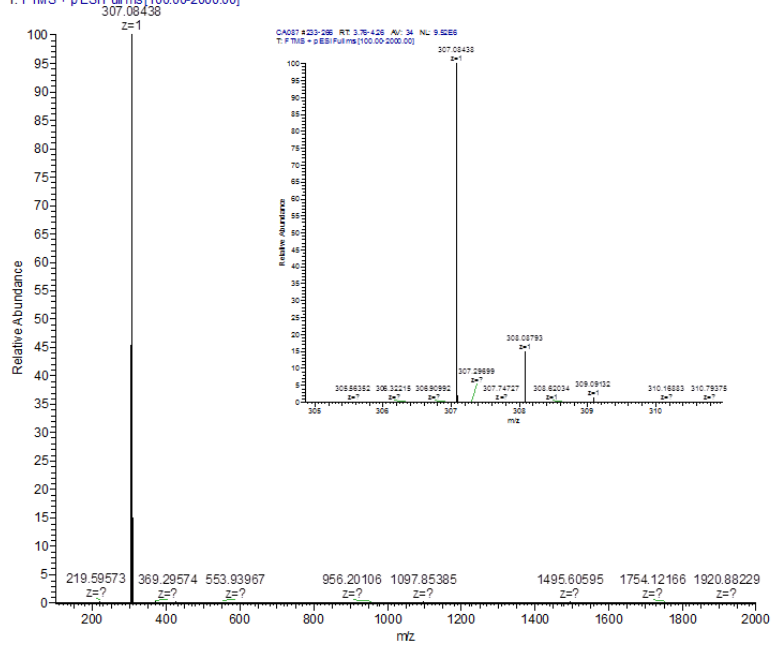

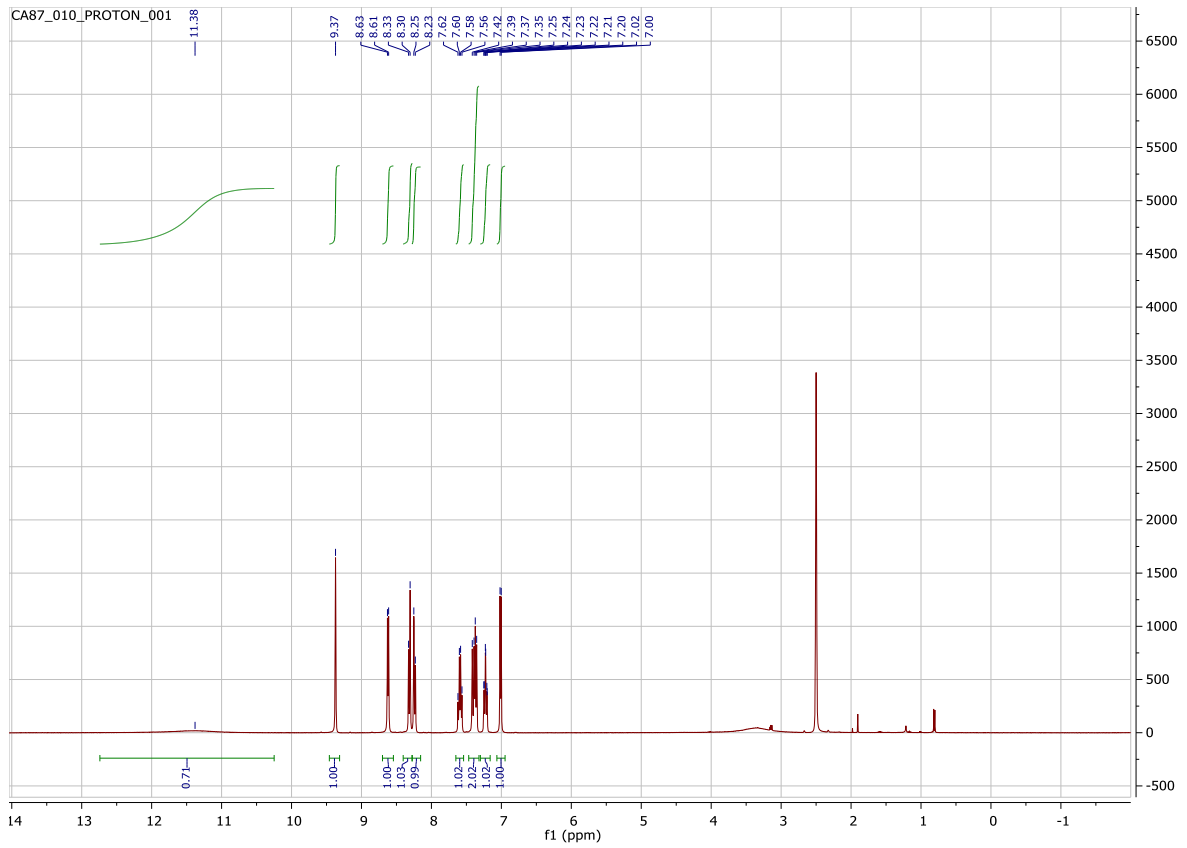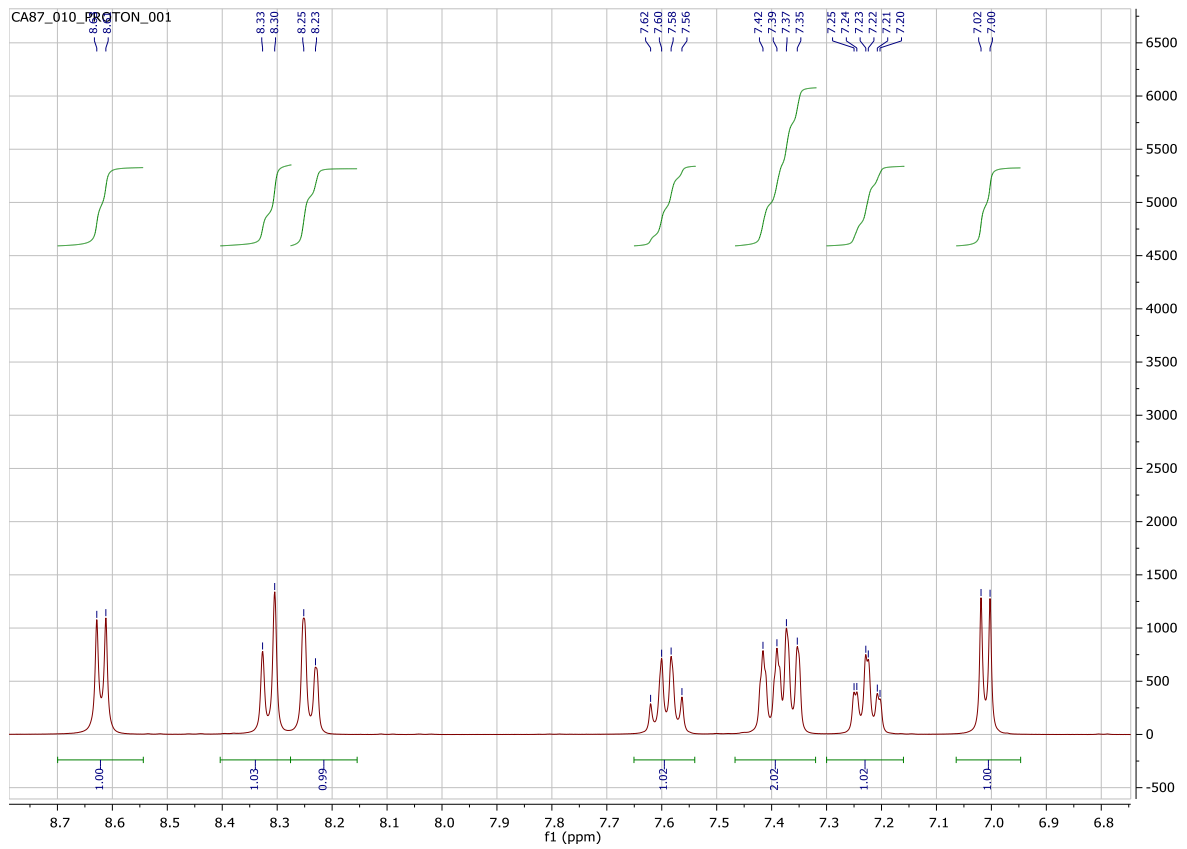

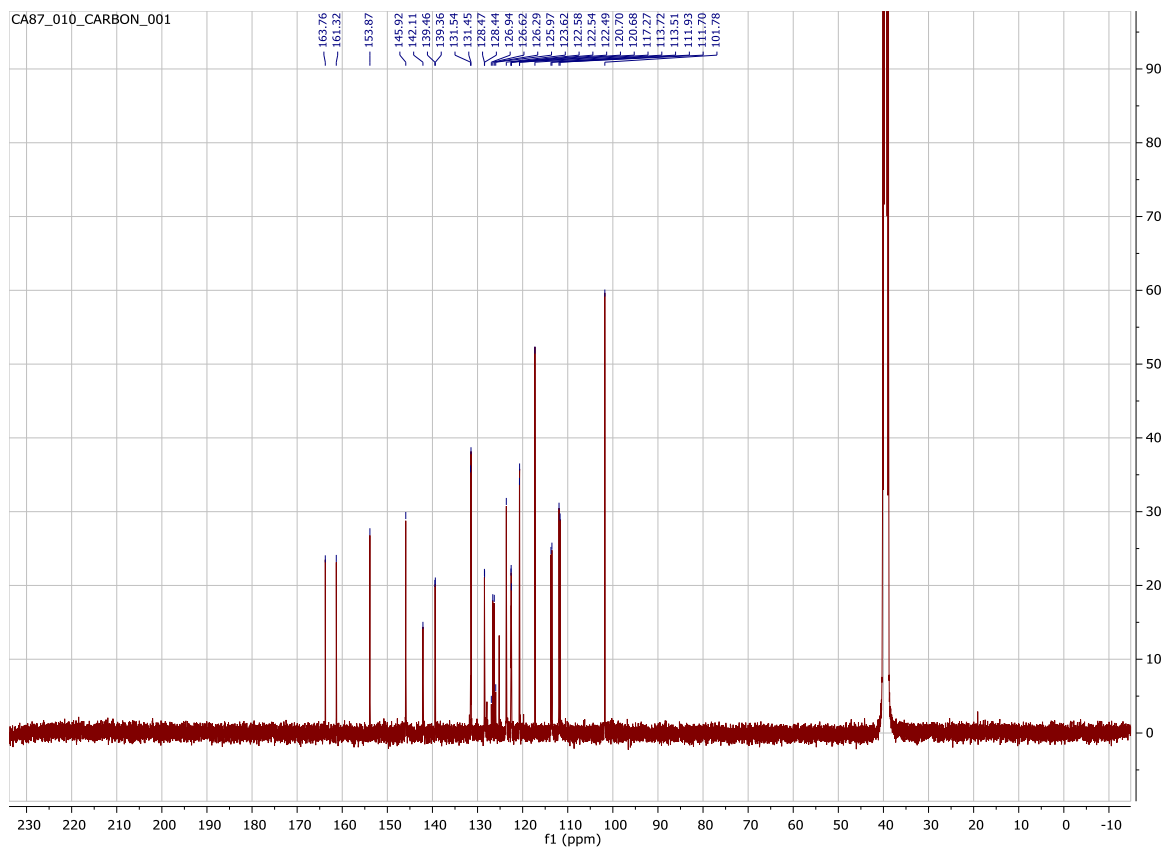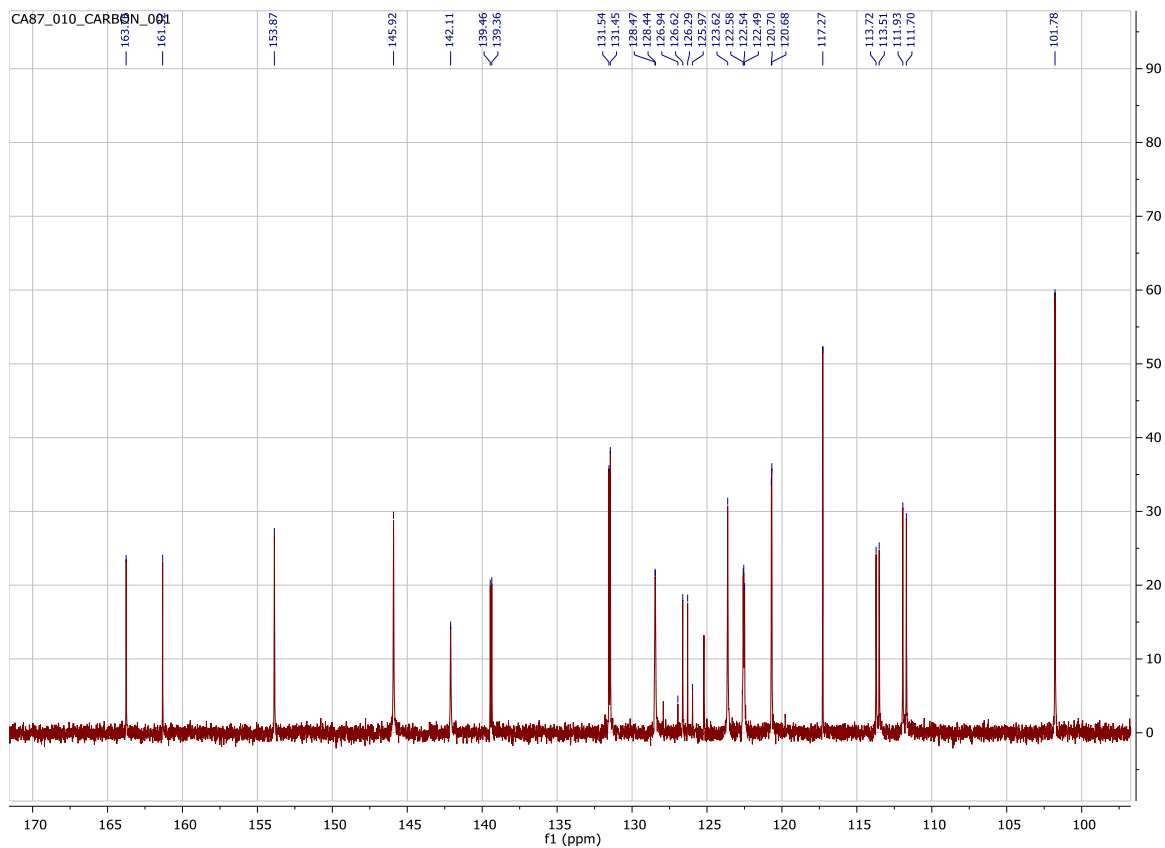

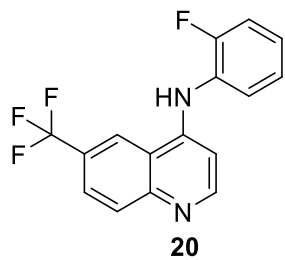

*N*-(2-Fluorophenyl)-6-(trifluoromethyl)quinolin-4-amine (**20**)

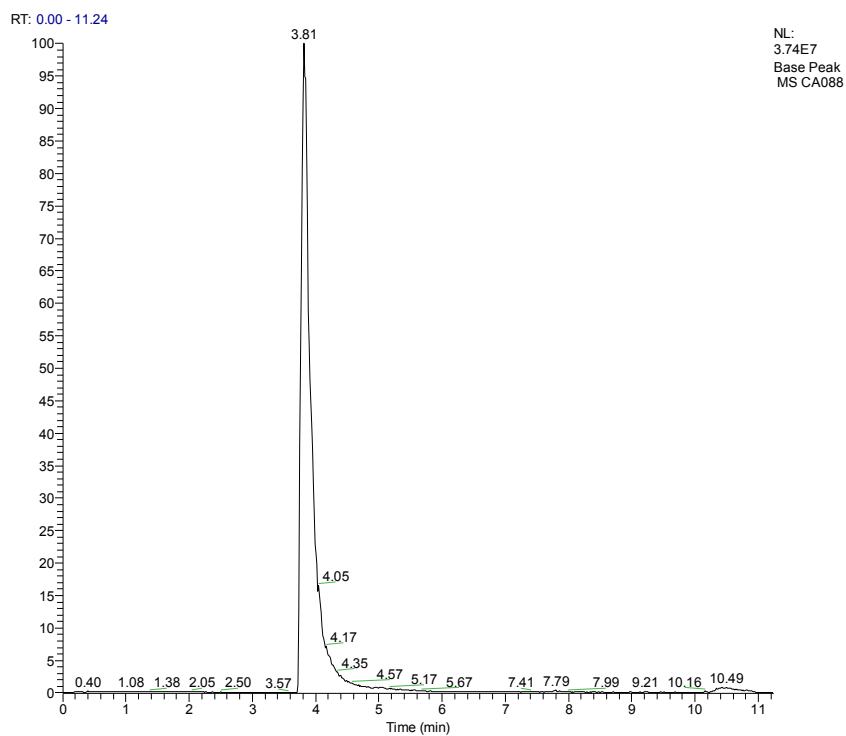

CA088 #225-264 RT: 3.62-4.22 AV: 40 NL: 1.11E7  
T: FTMS + p ESI Full MS [100.00-2000.00]  
307.08436

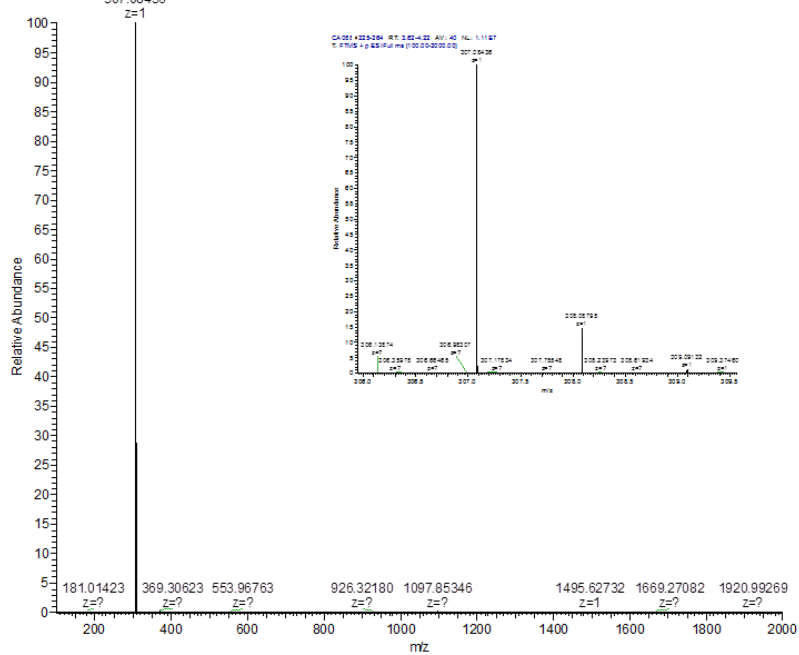

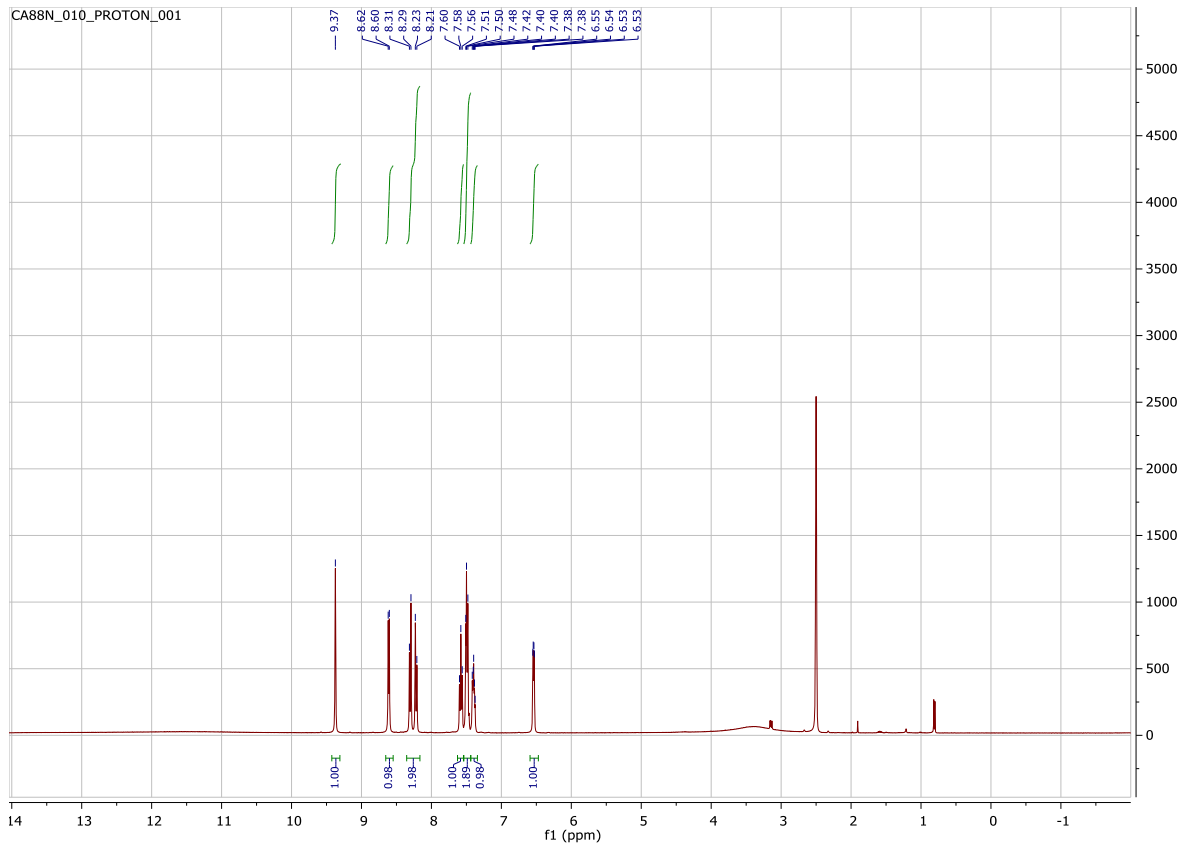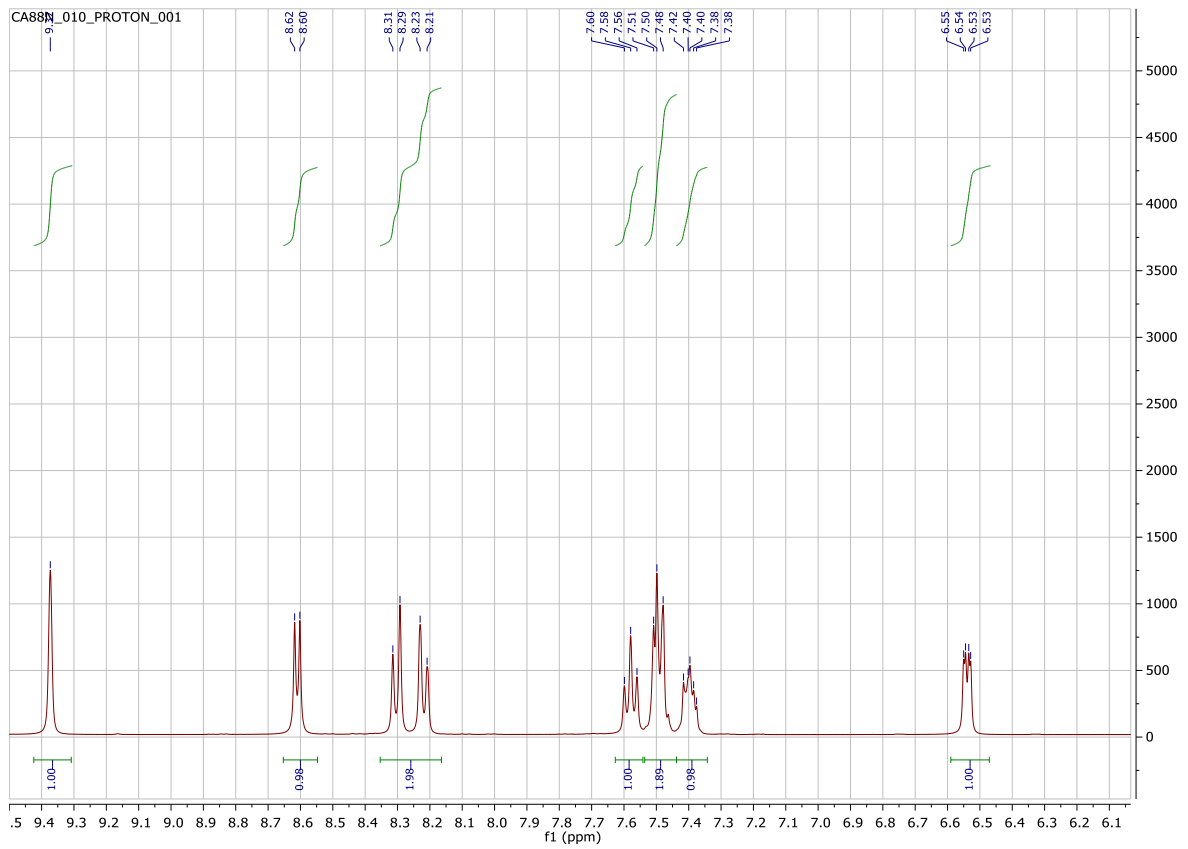

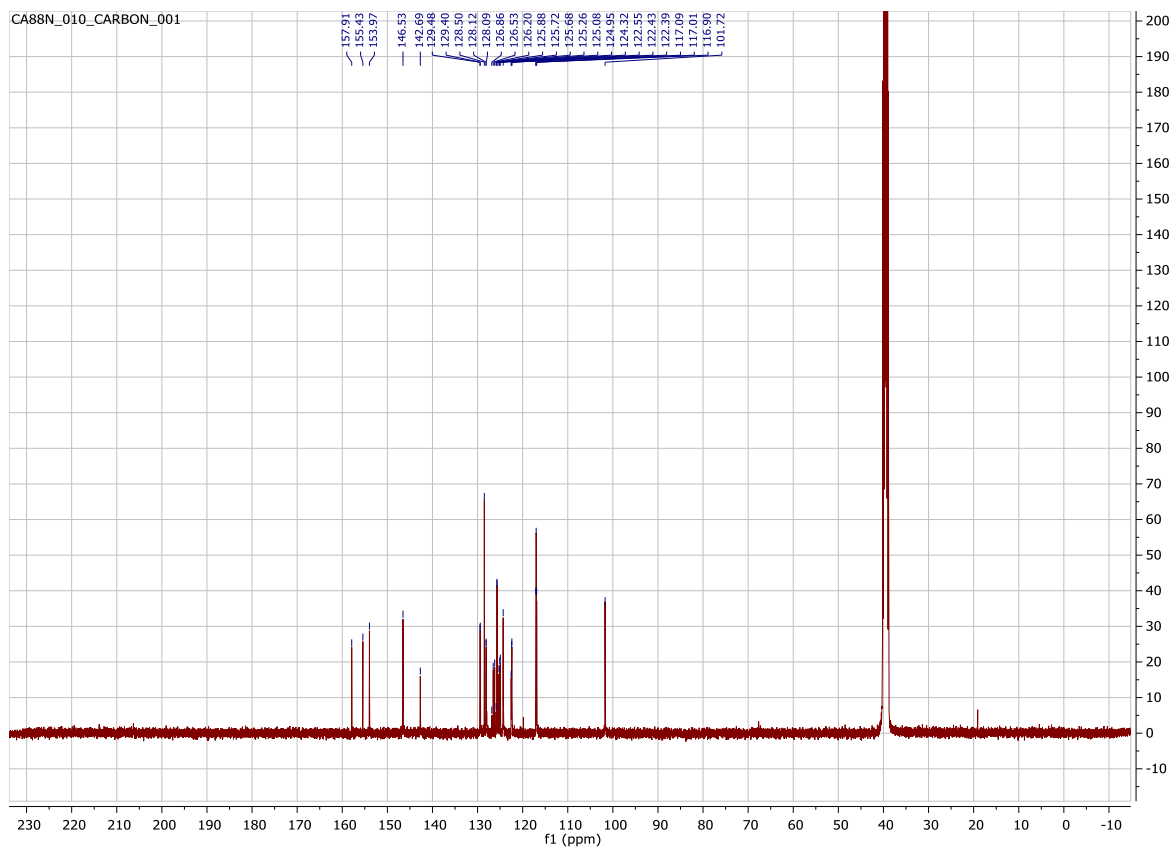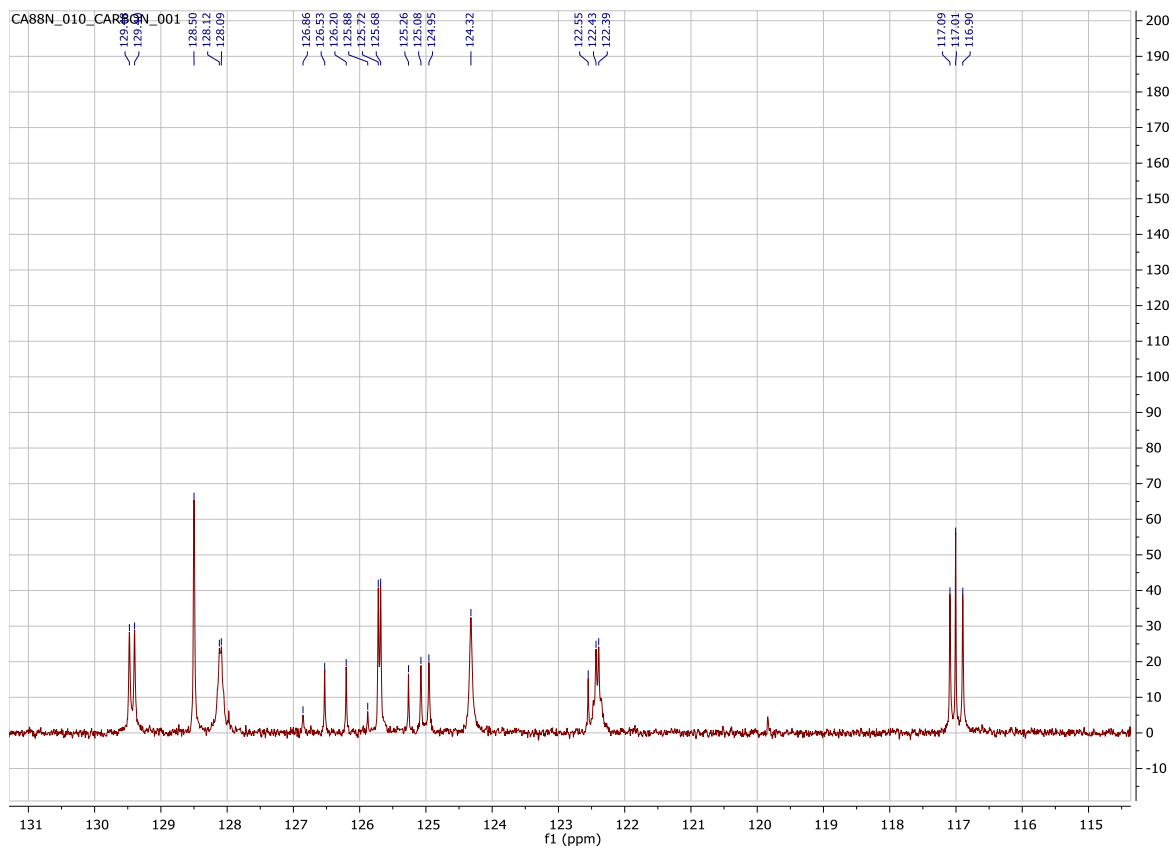

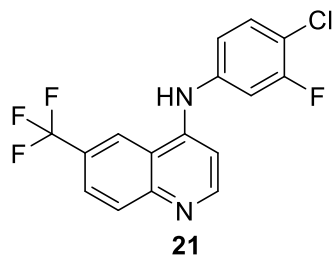

*N*-(4-Chloro-3-fluorophenyl)-6-(trifluoromethyl)quinolin-4-amine (**21**)

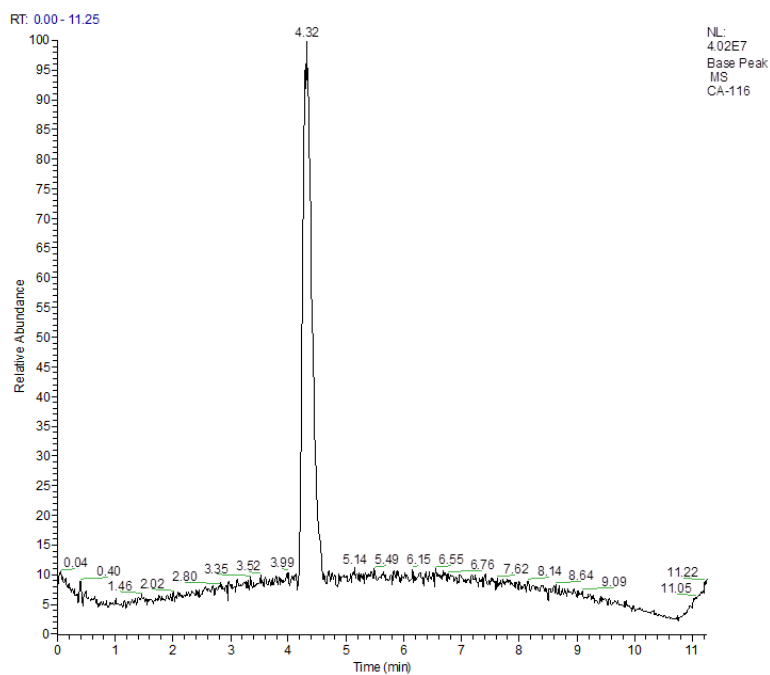

CA-116 #277-311 RT: 4.13-4.63 AV: 35 NL: 1.59E7  
T: FTMS + p ESI Full ms [100.00-2000.00]

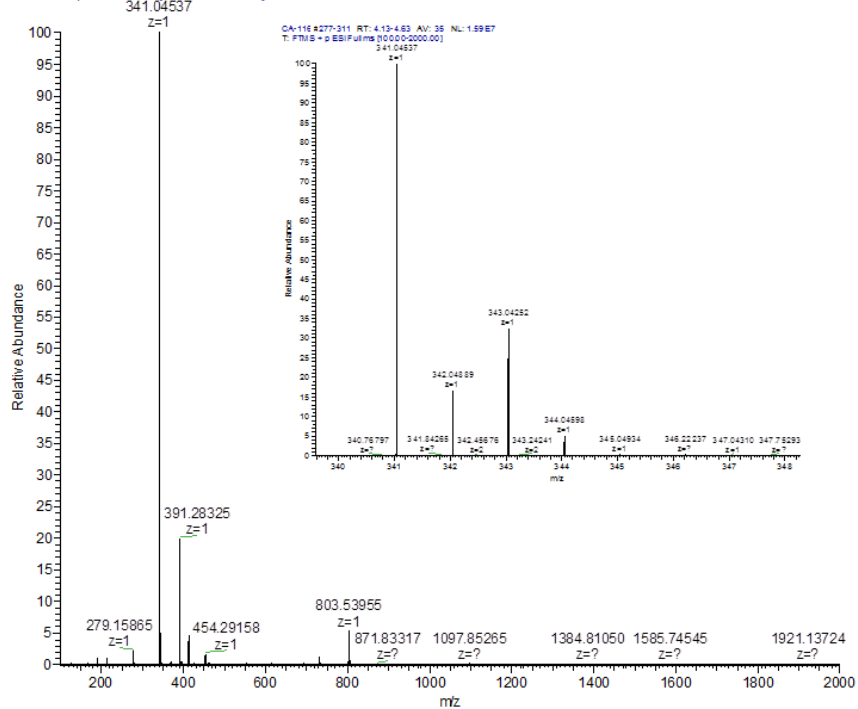

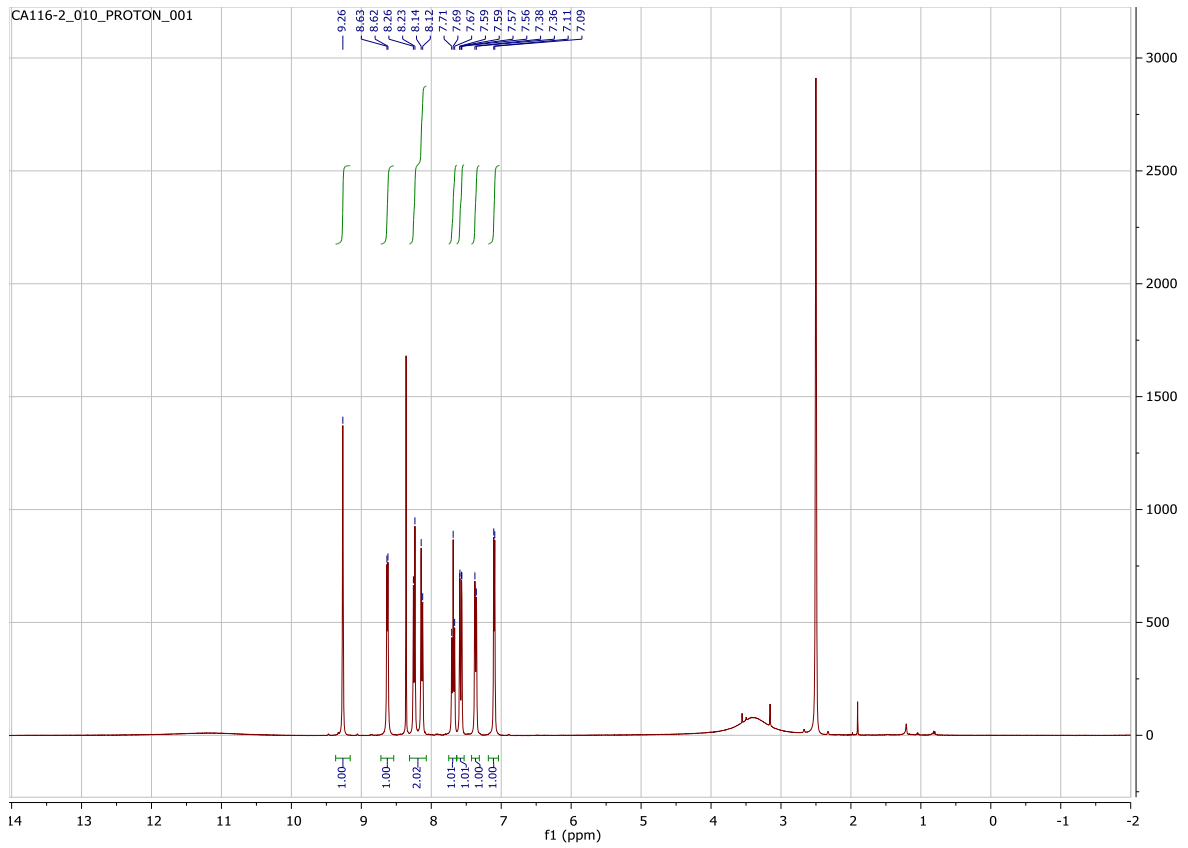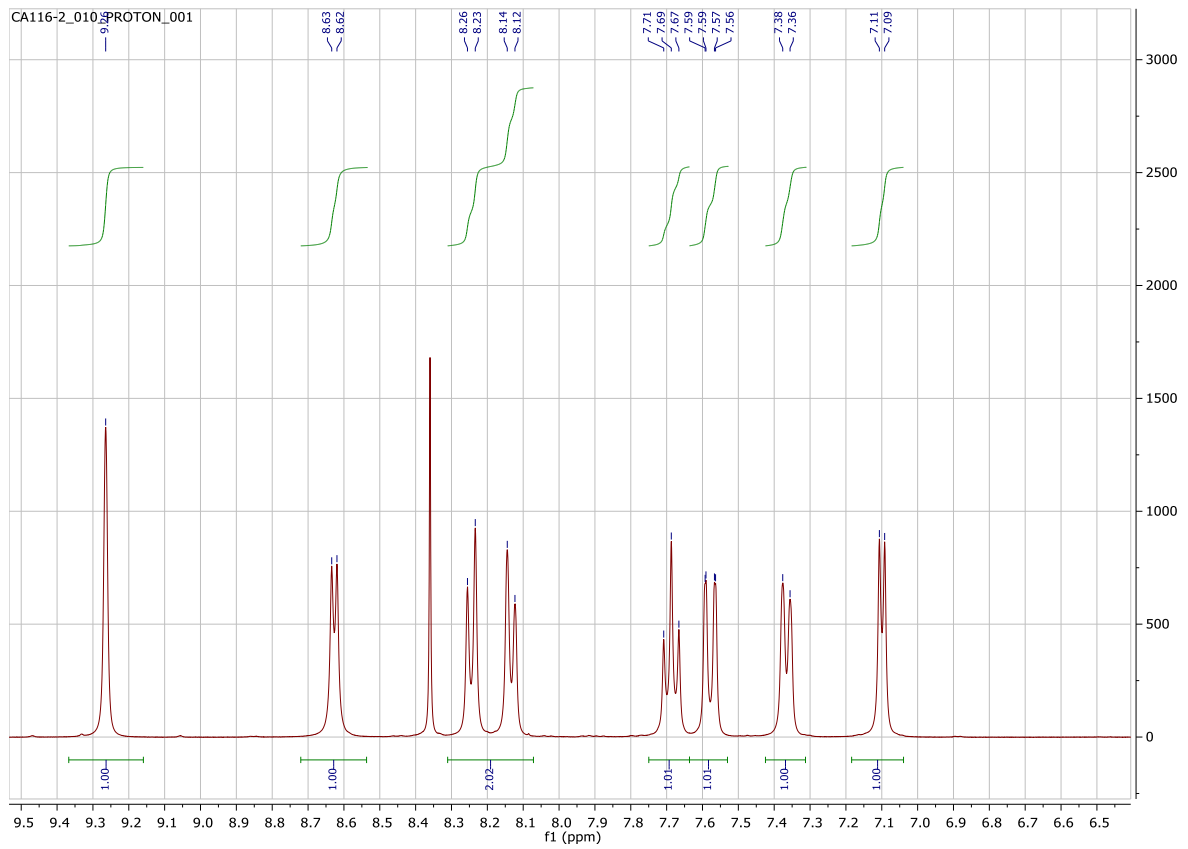



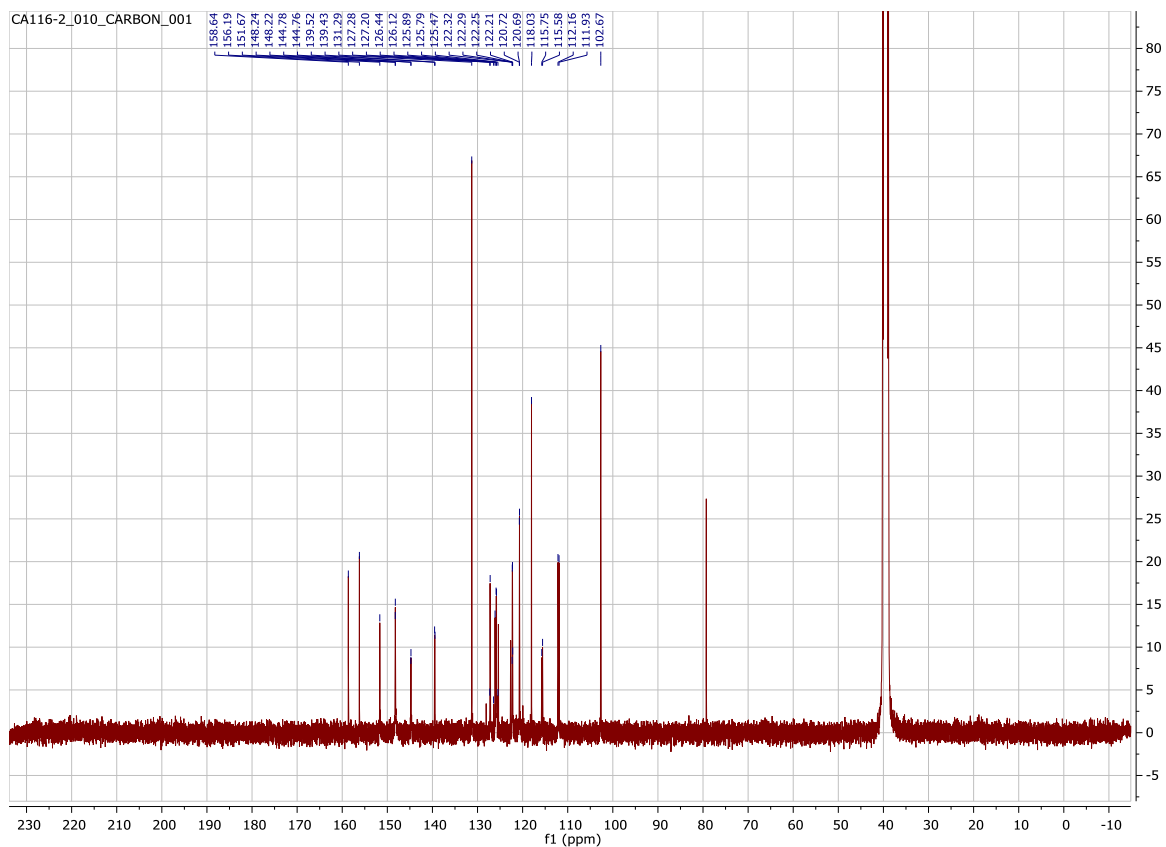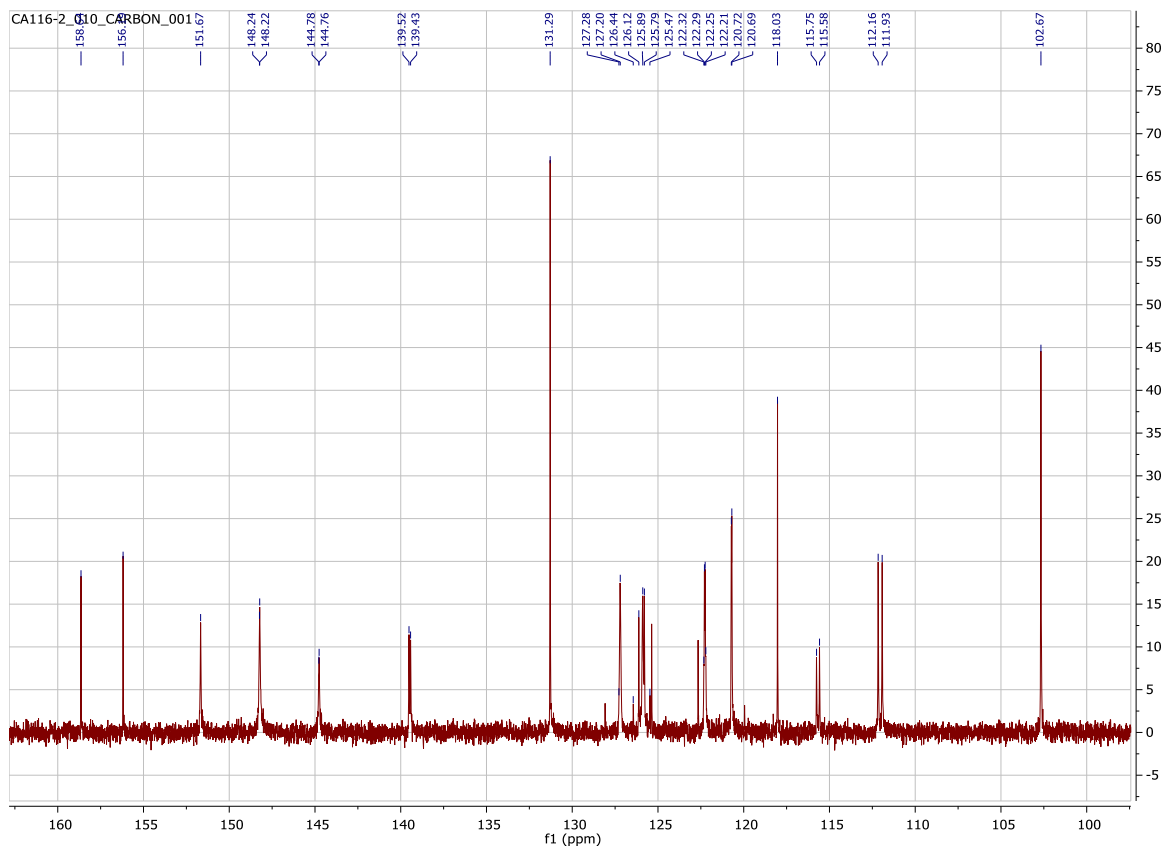

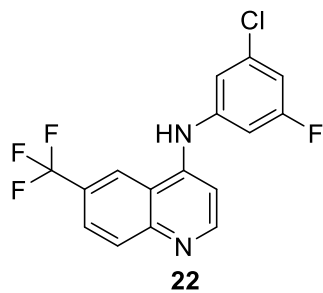

N-(3-Chloro-5-fluorophenyl)-6-(trifluoromethyl)quinolin-4-amine (**22**)

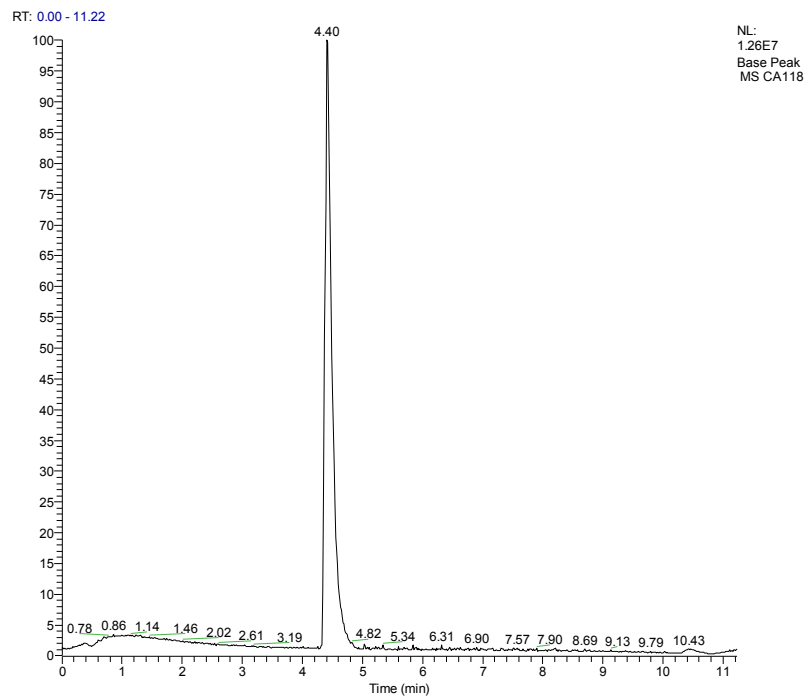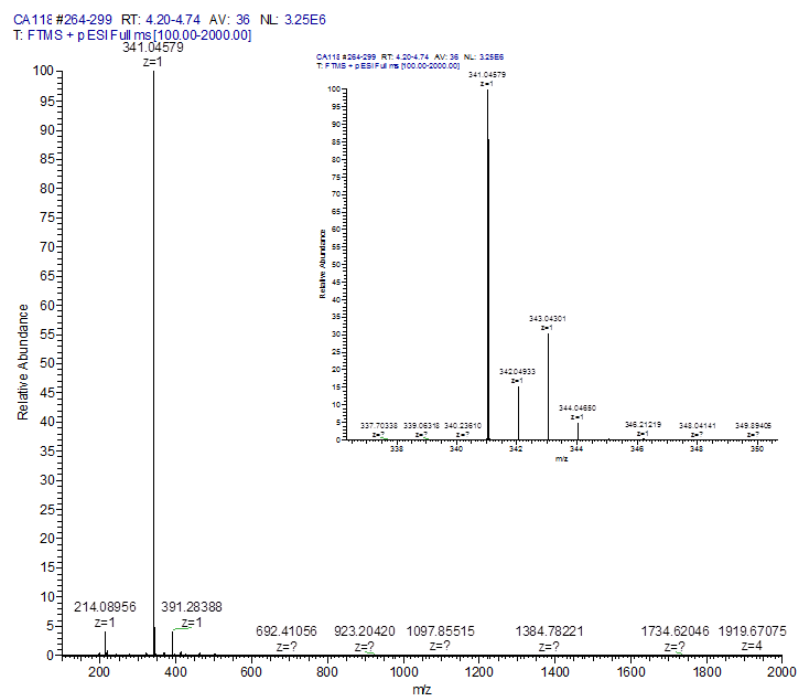

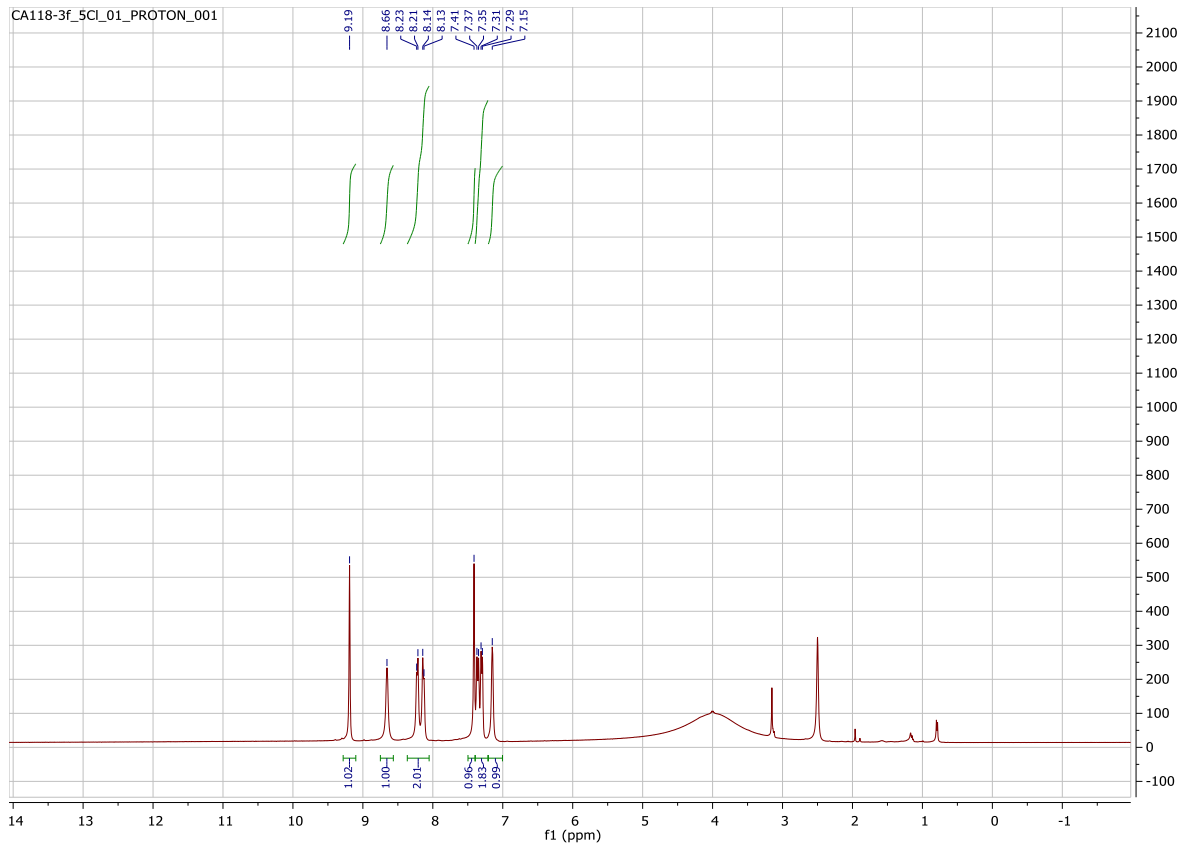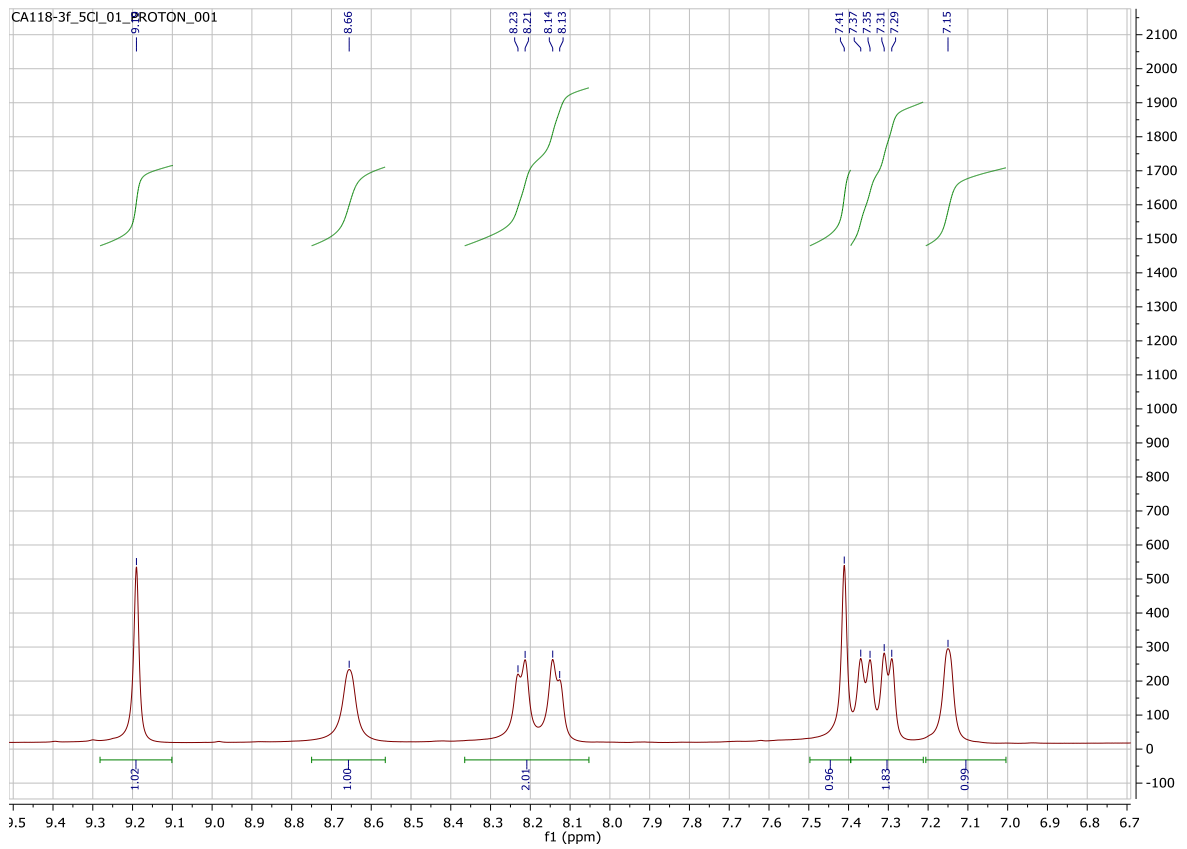

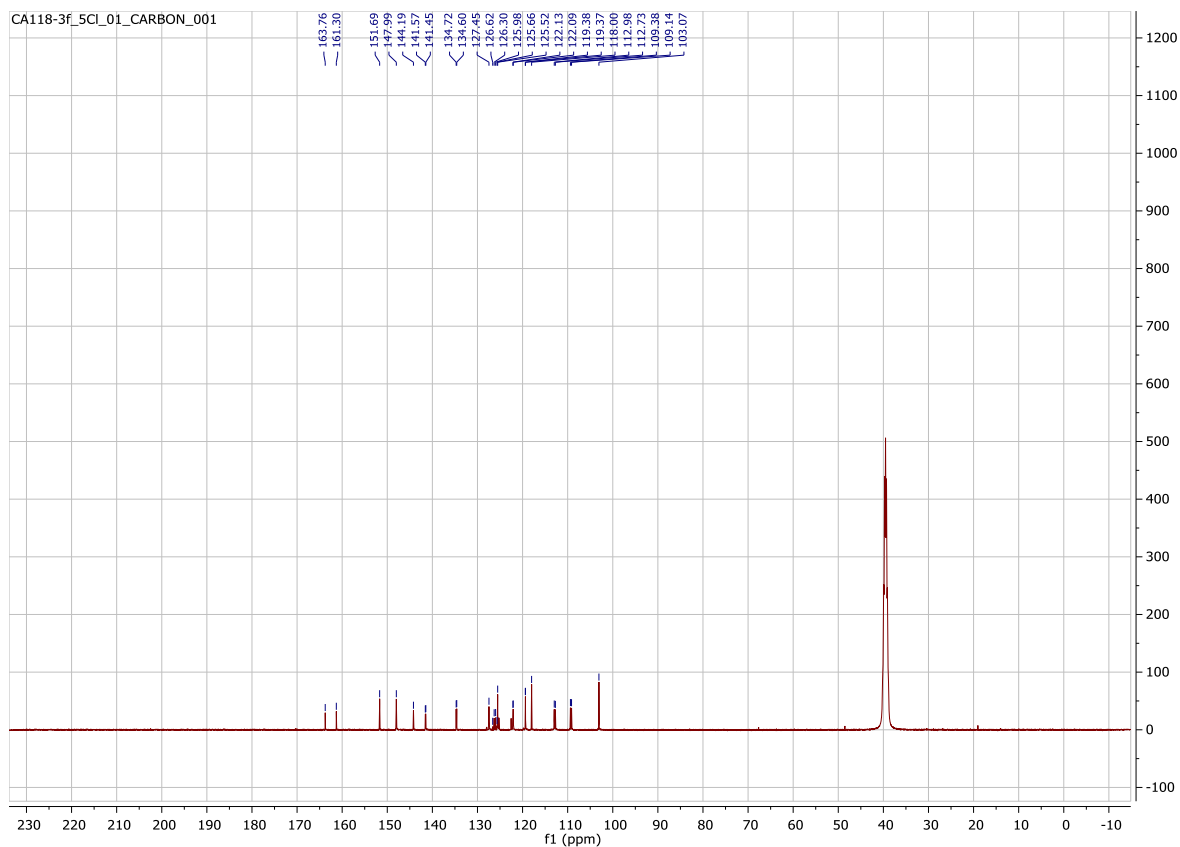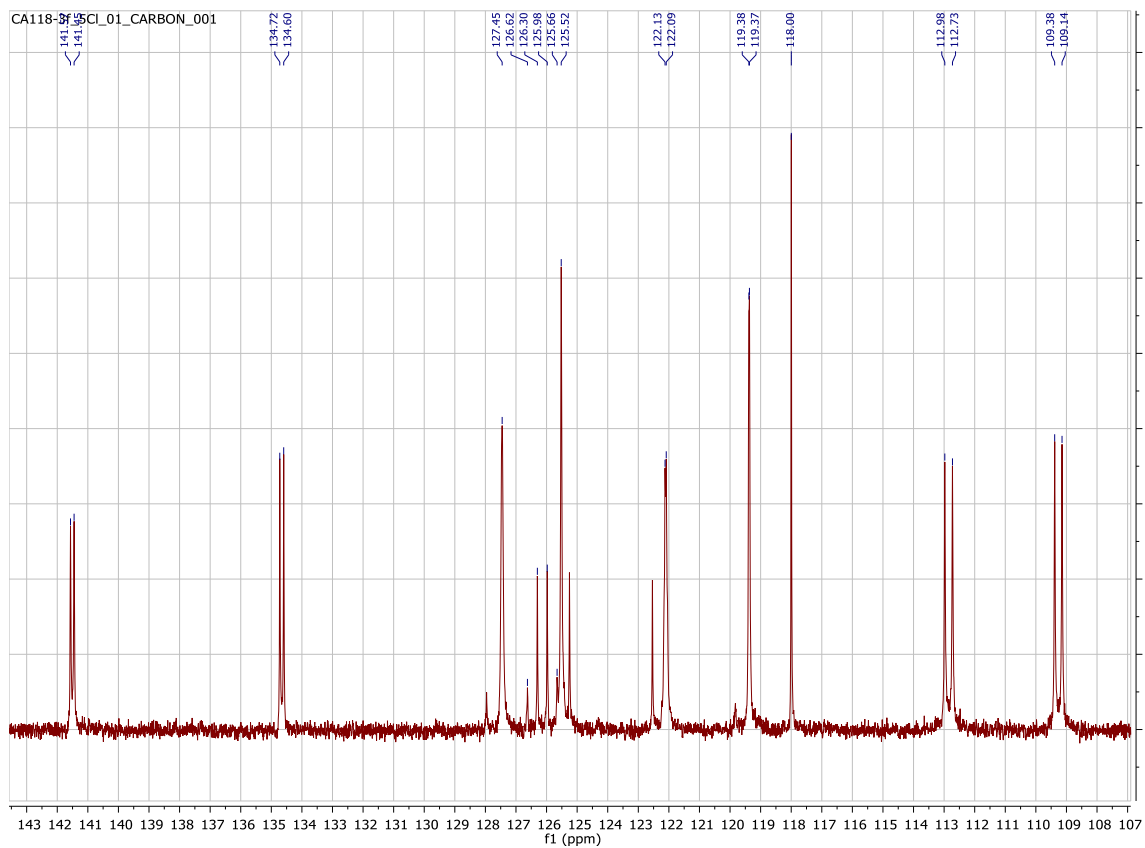

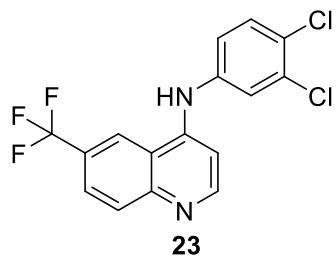

**N-(3,4-Dichlorophenyl)-6-(trifluoromethyl)quinolin-4-amine (23)**

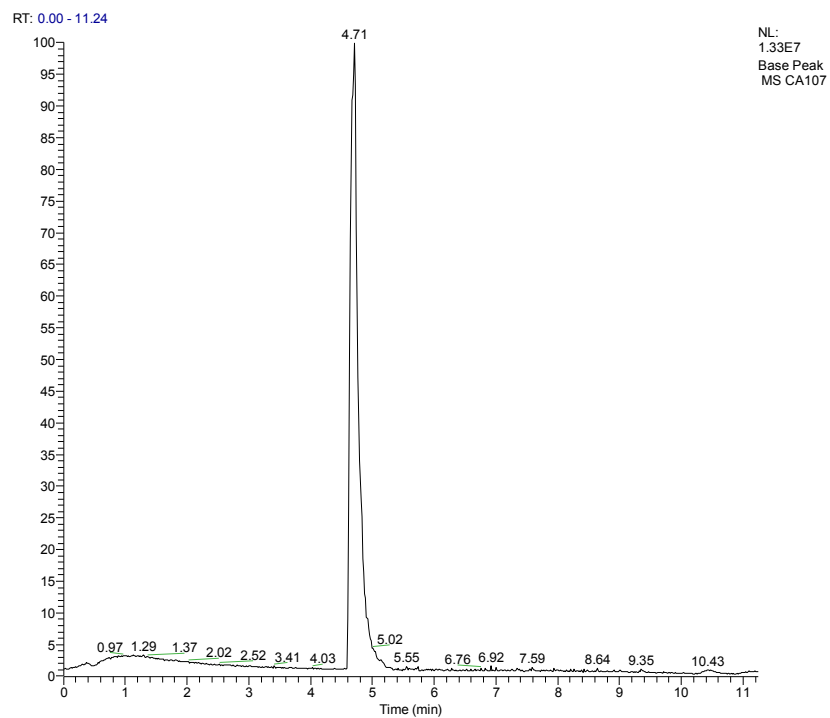

CA107 #281-317 RT: 4.49-5.05 AV: 37 NL: 3.74E6  
T: FTMS + p ESI Full ms [100.00-2000.00]

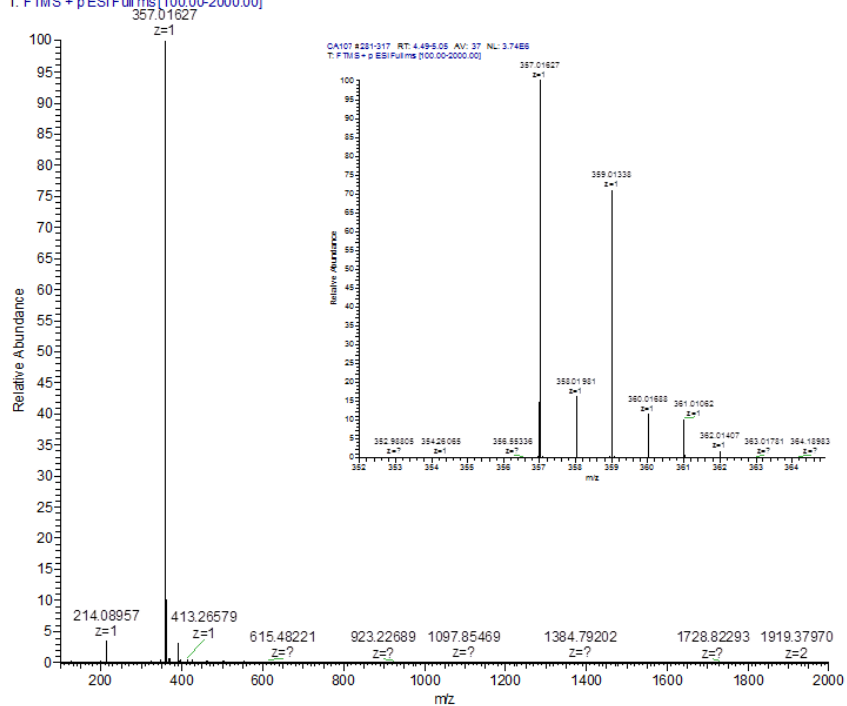

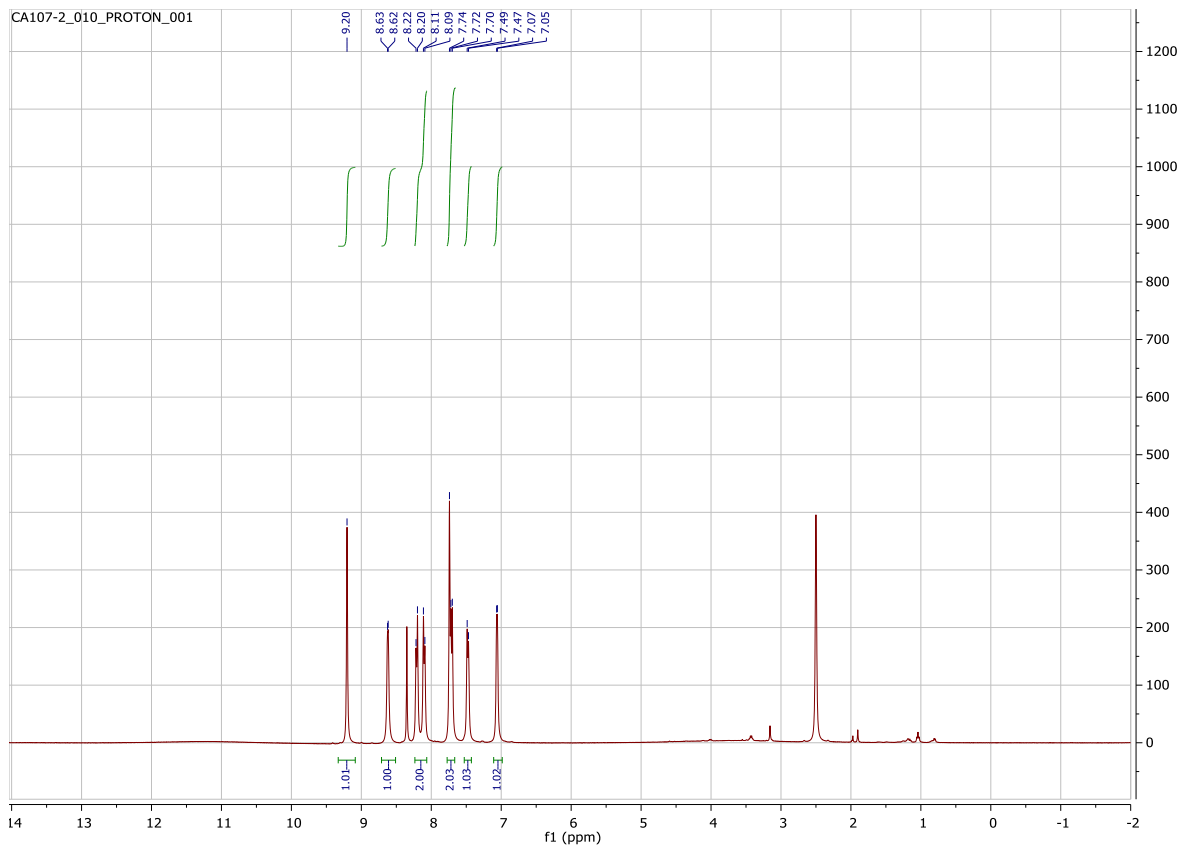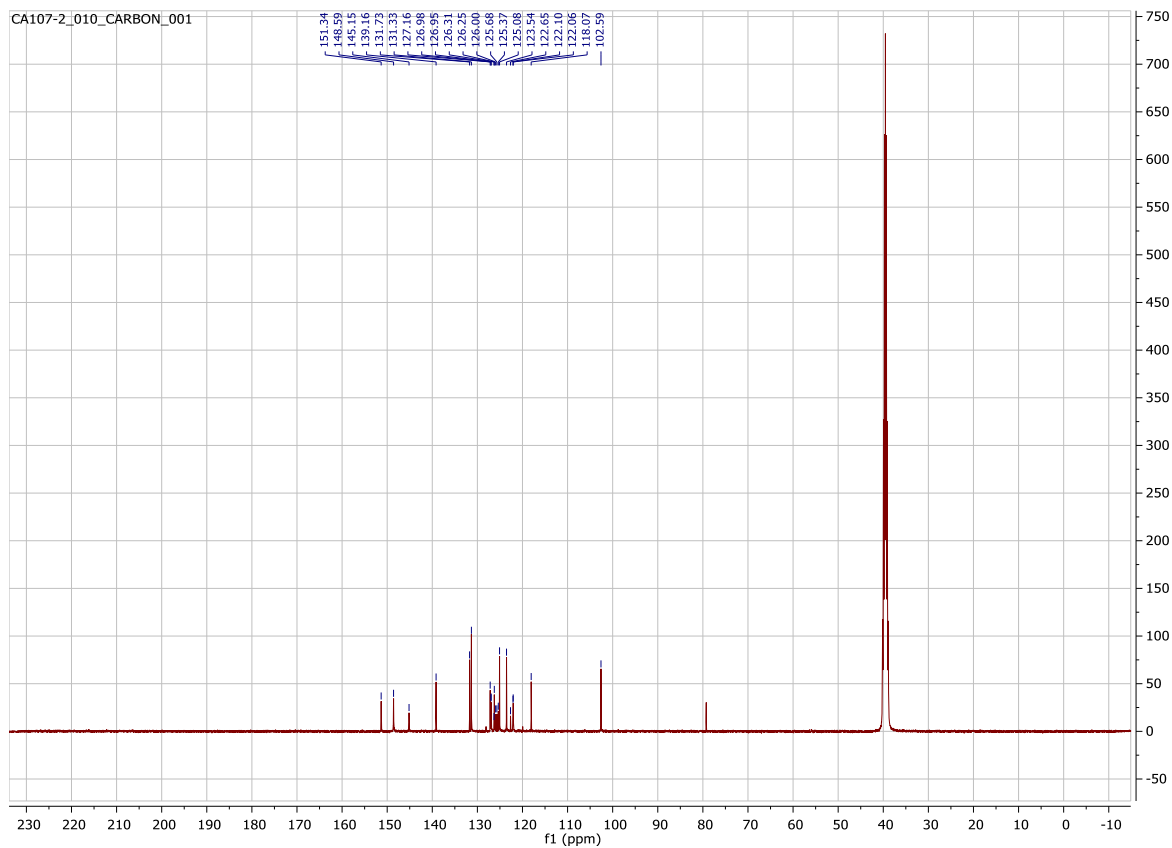

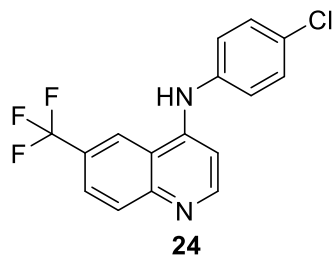

*N*-(4-Chlorophenyl)-6-(trifluoromethyl)quinolin-4-amine (**24**)

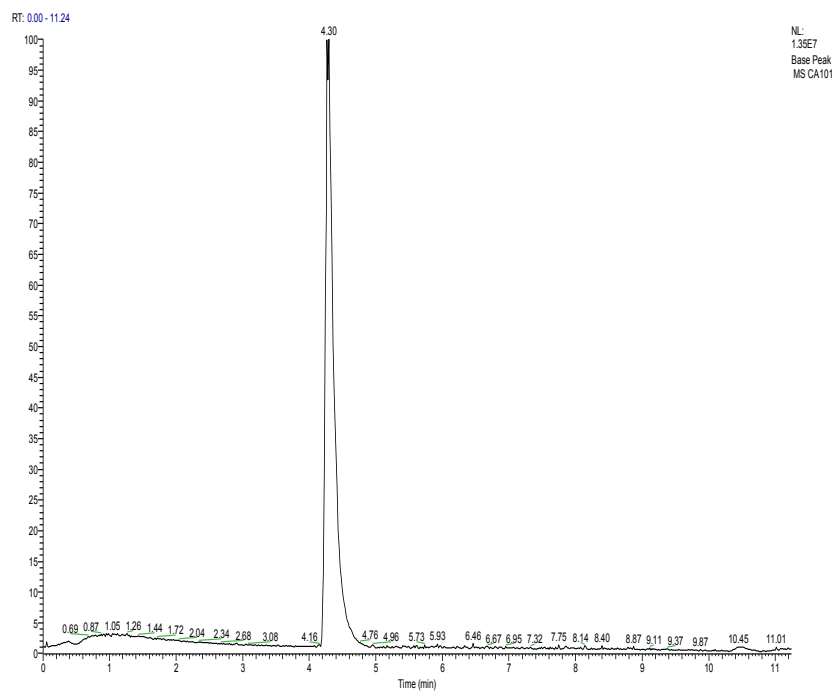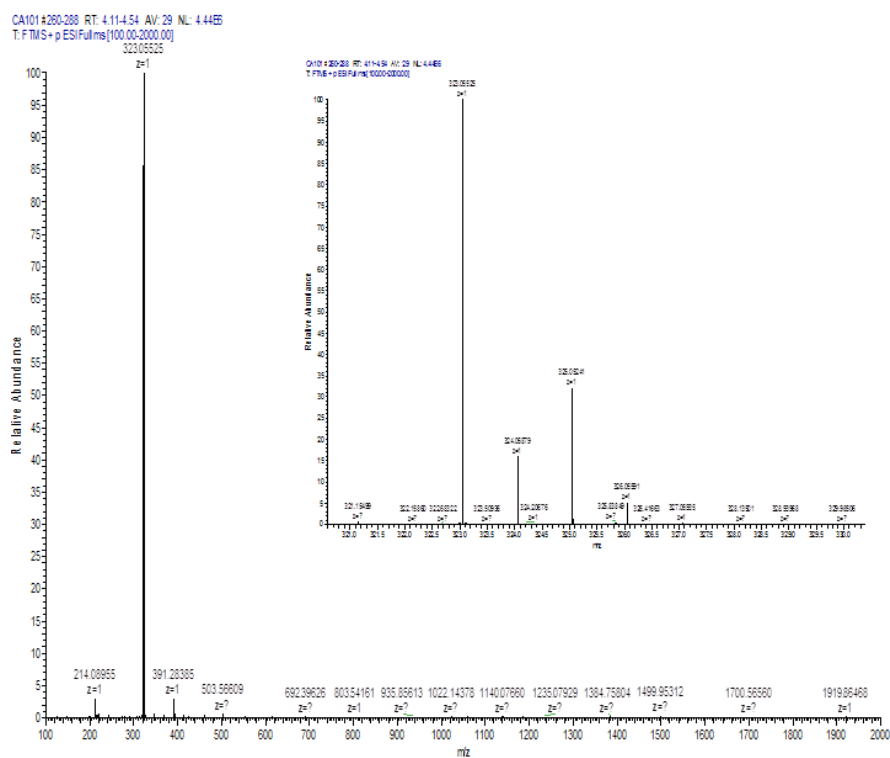

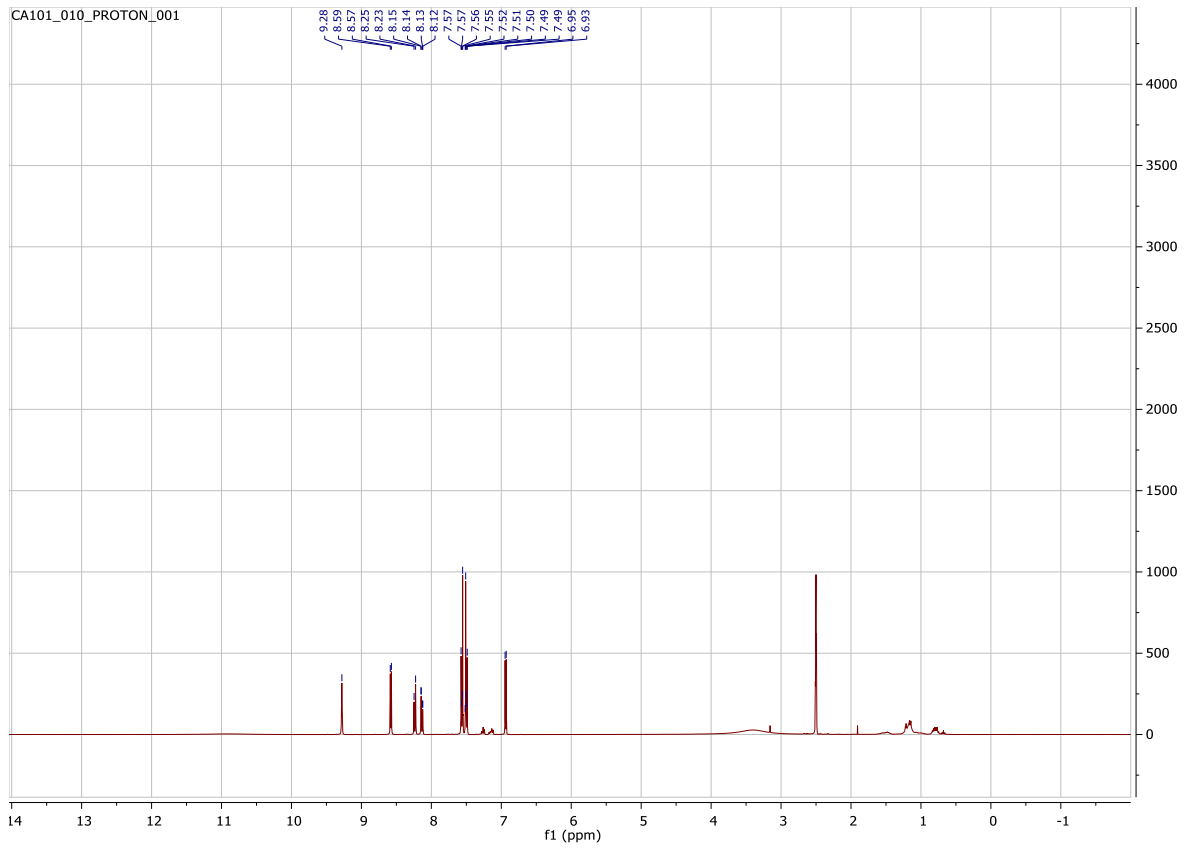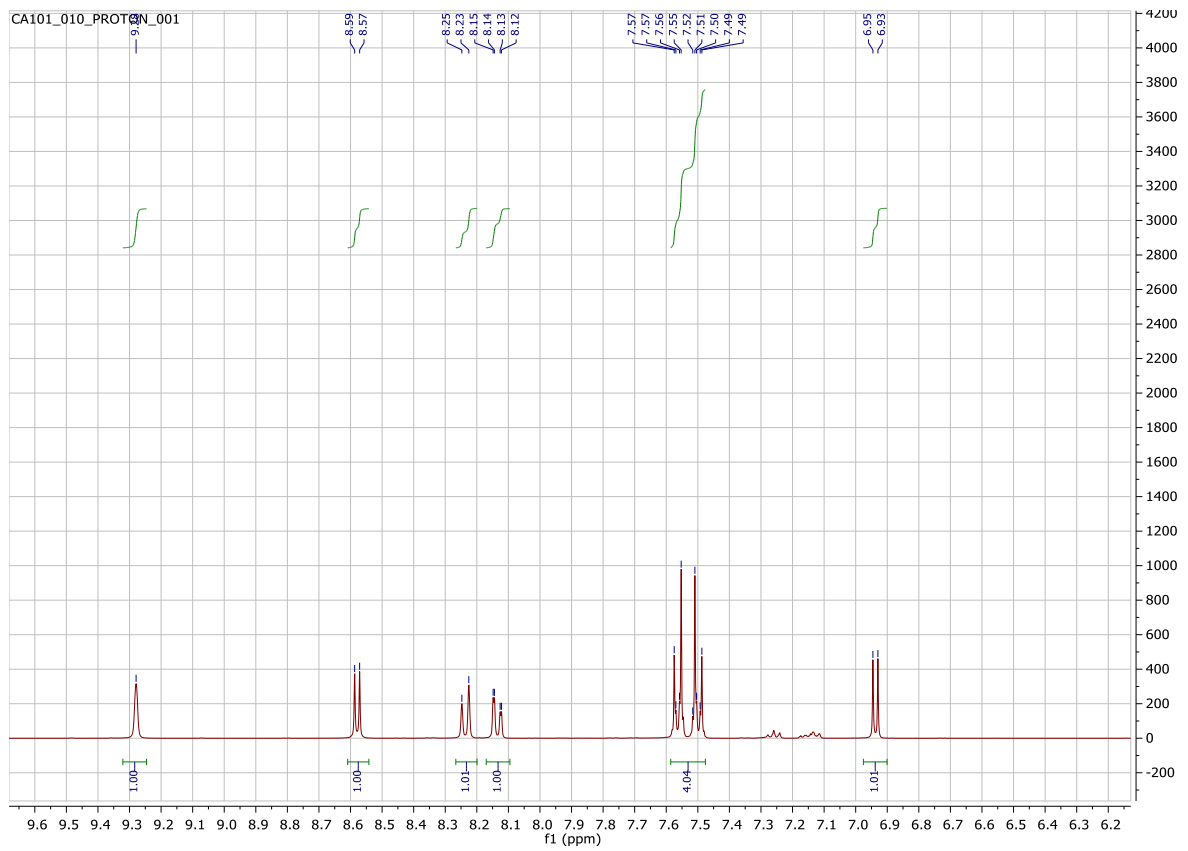



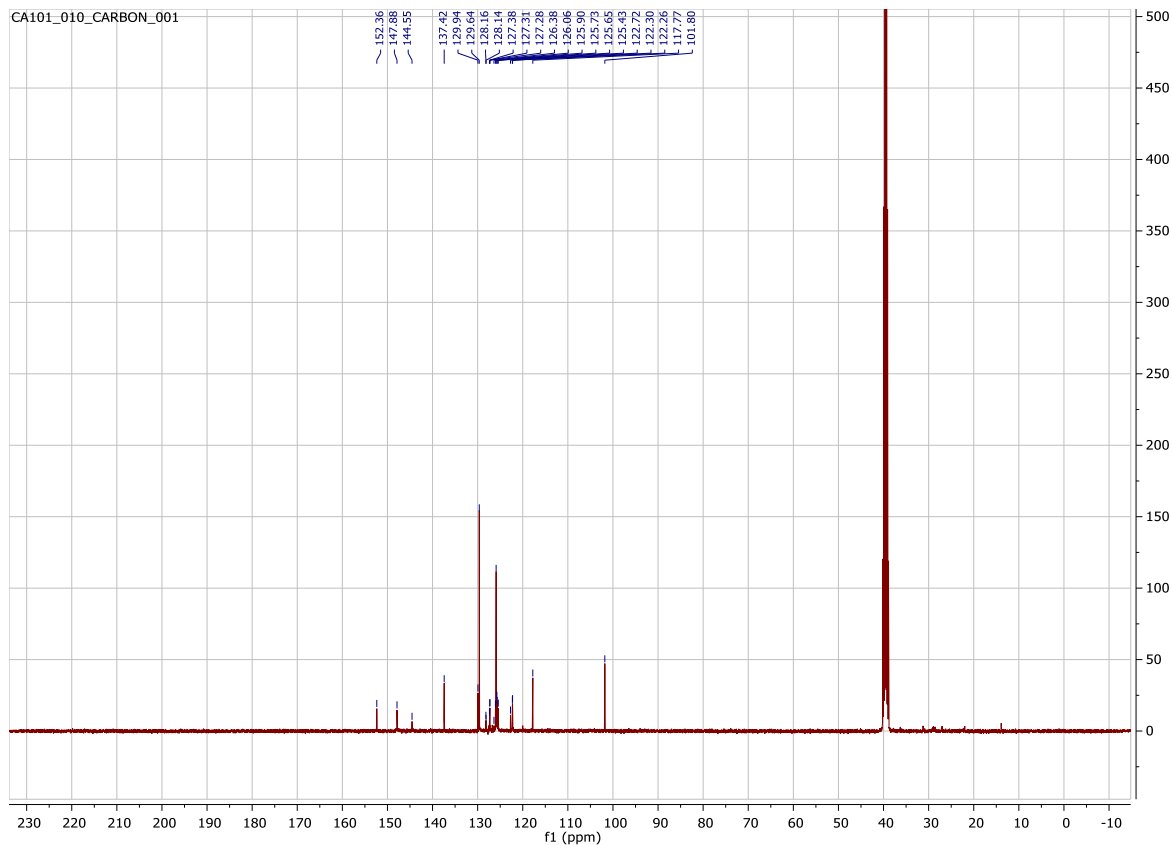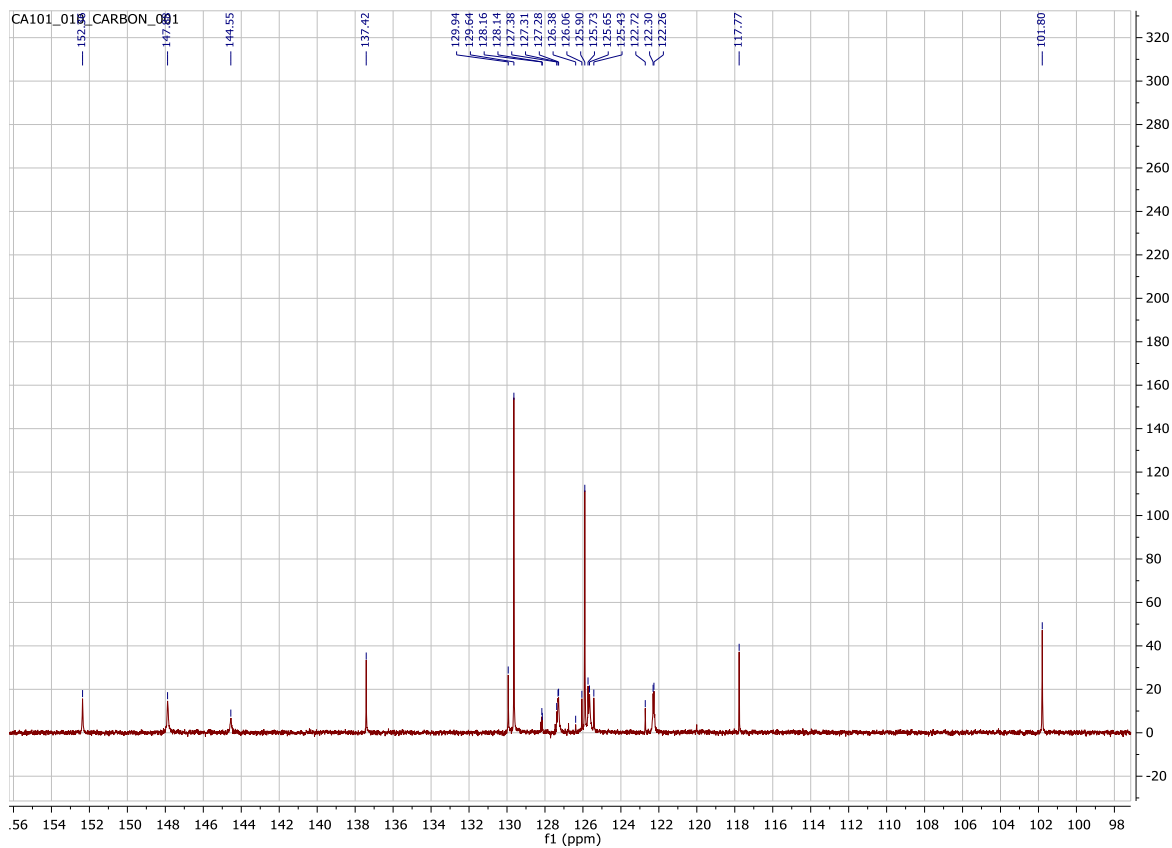

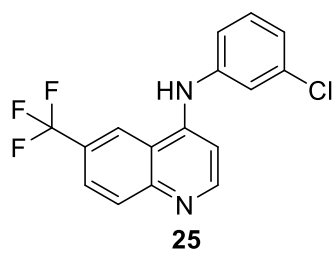

*N*-(3-Chlorophenyl)-6-(trifluoromethyl)quinolin-4-amine (**25**)

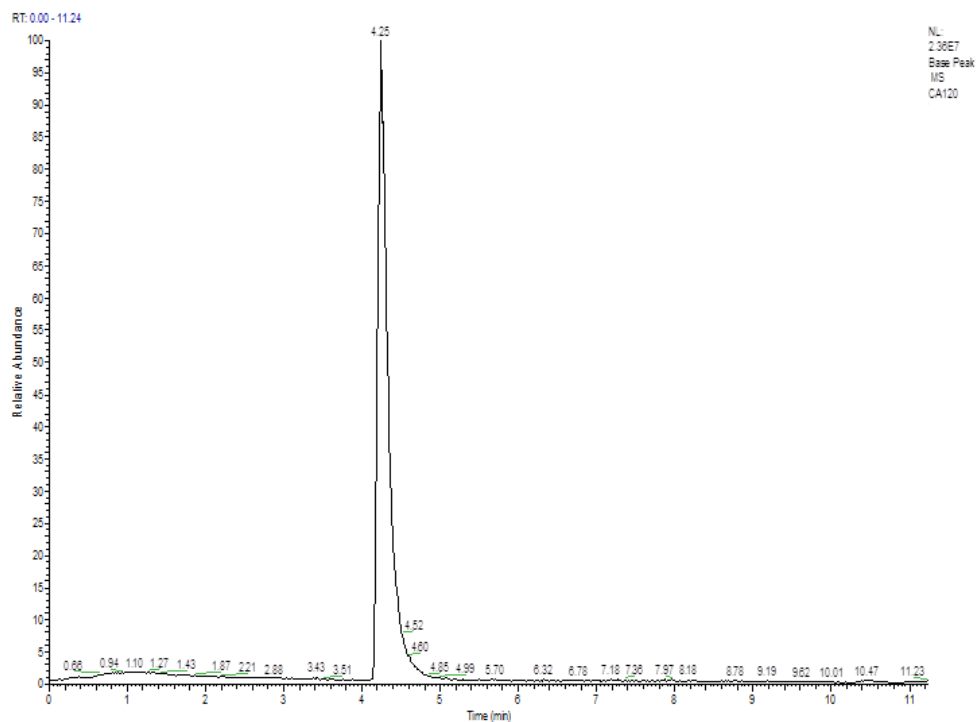

CA120#257-280 RT: 4.08-4.58 AV: 34 NL: 7.24E8  
T: F TMS+ p ESI/Fulms [100.00-2000.00]

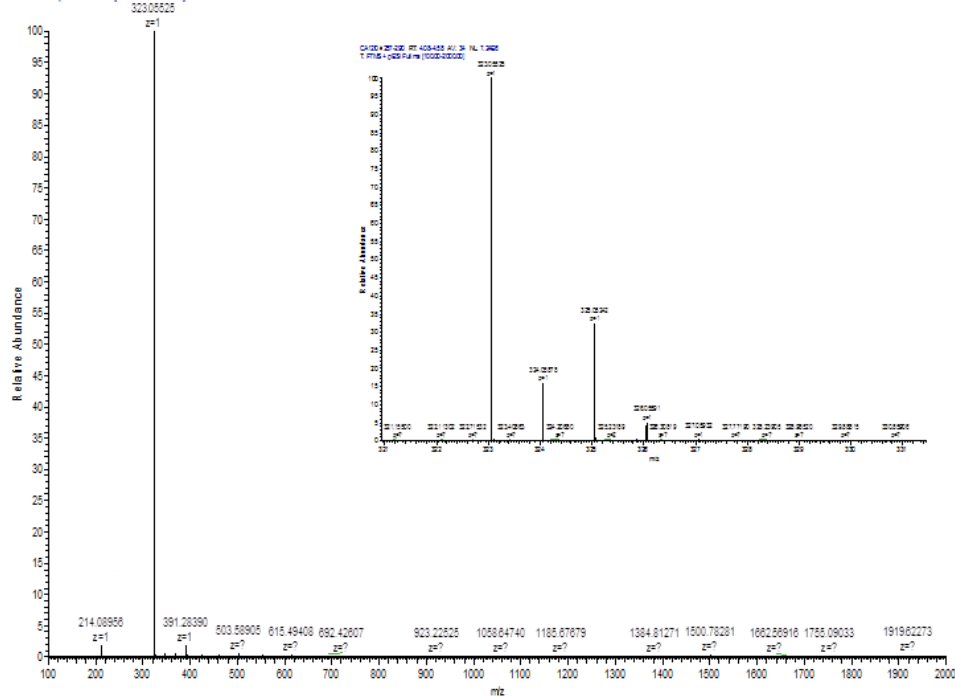

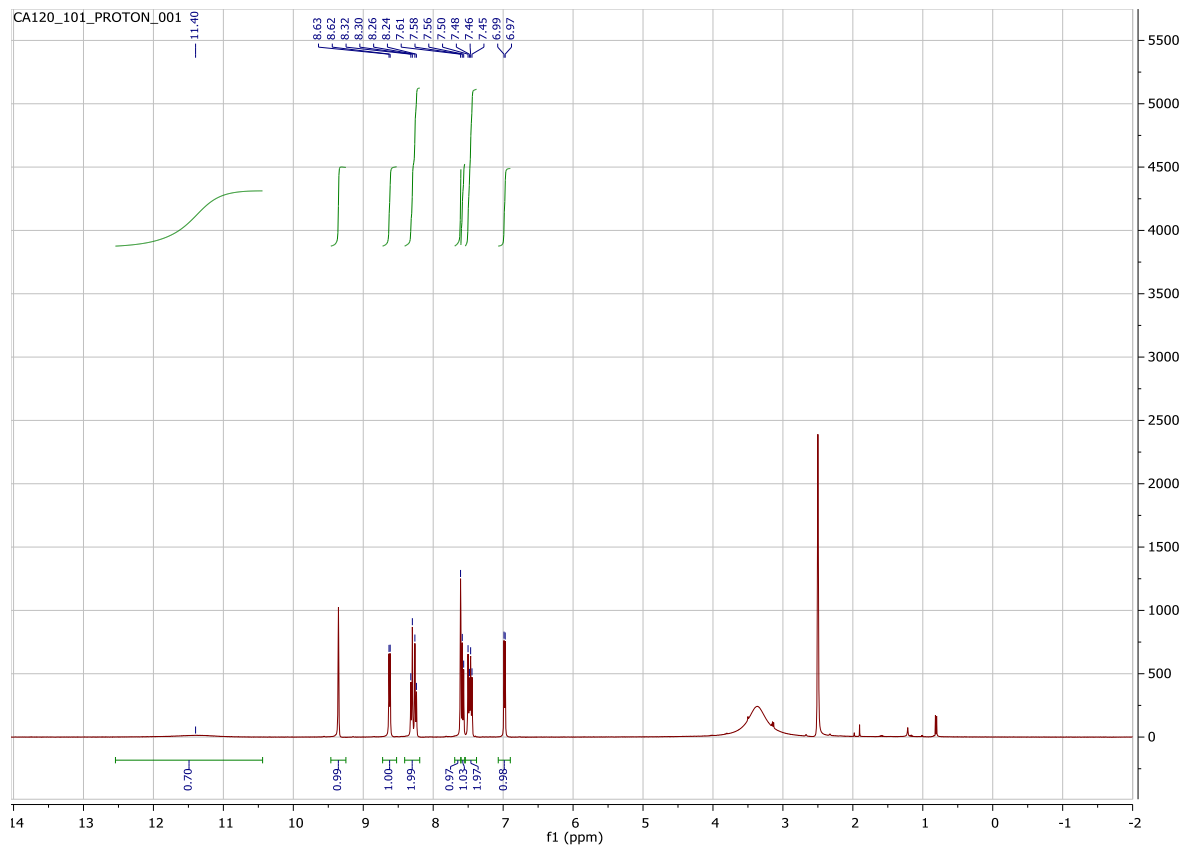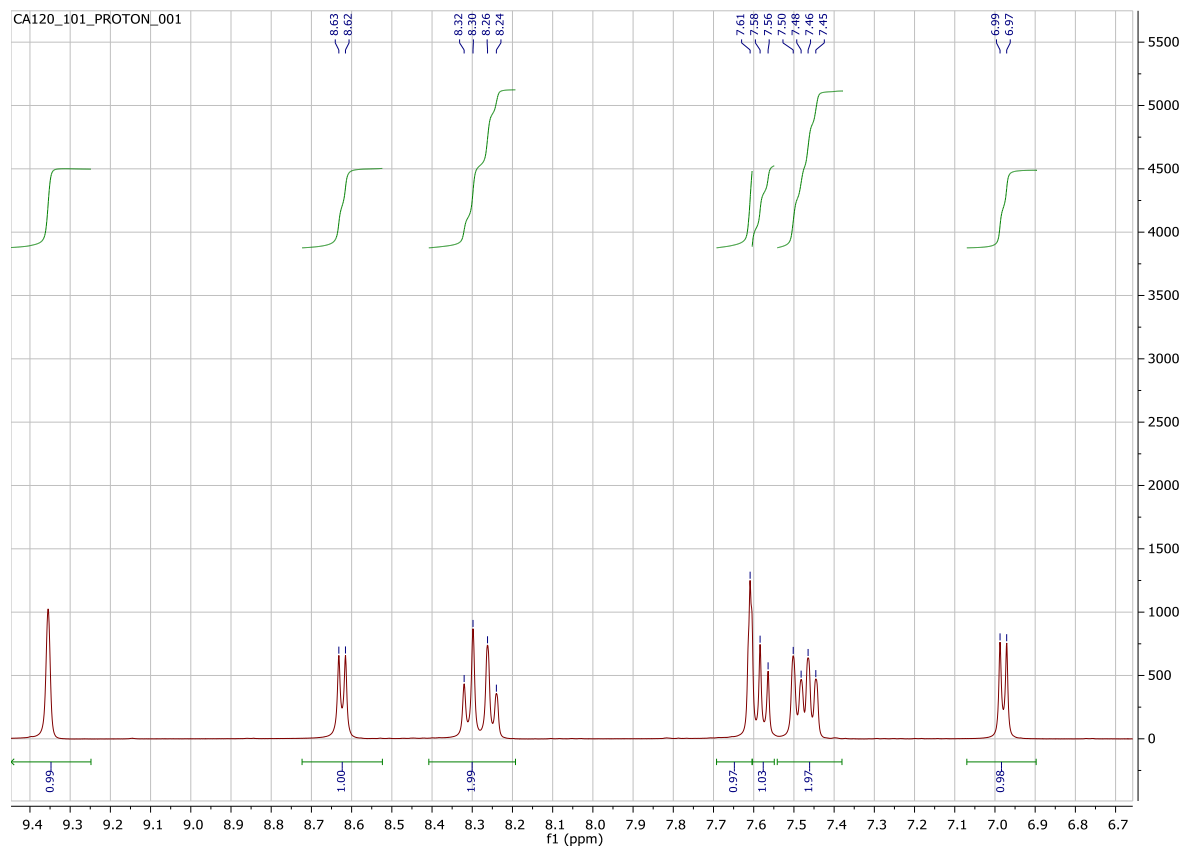

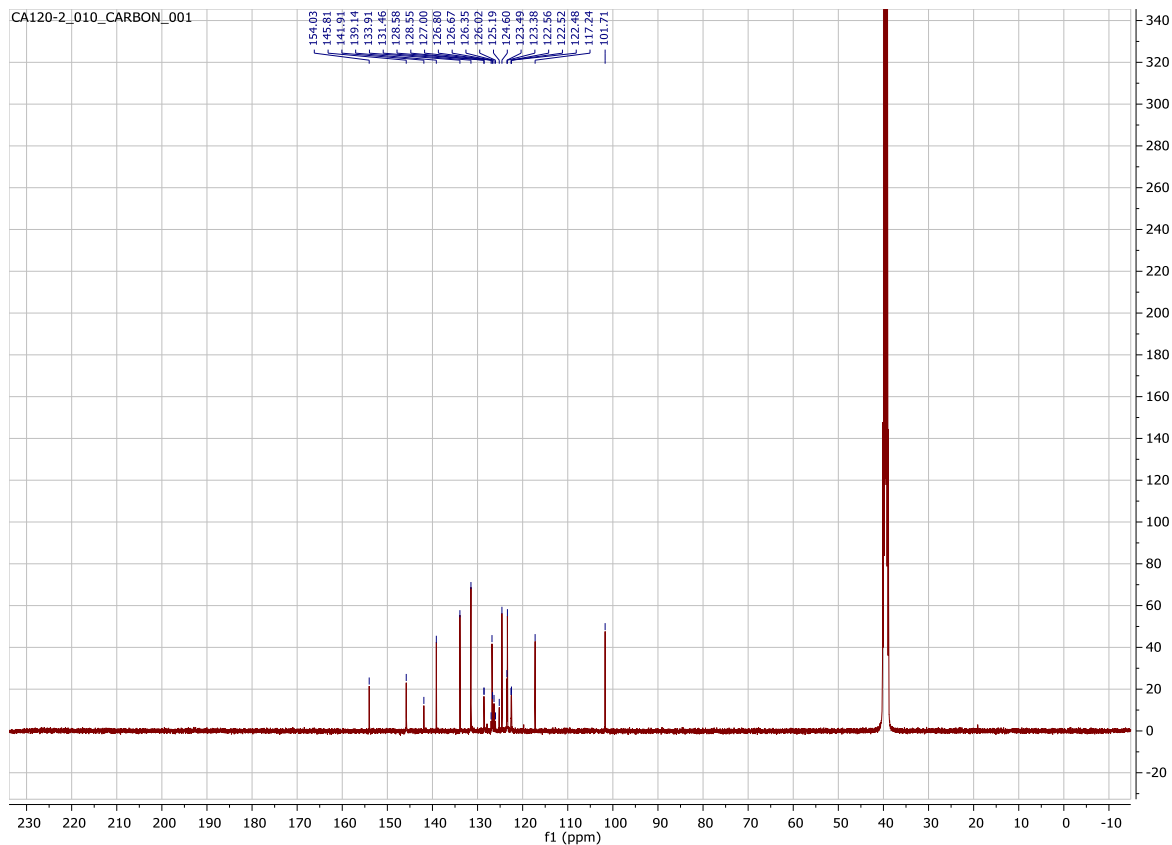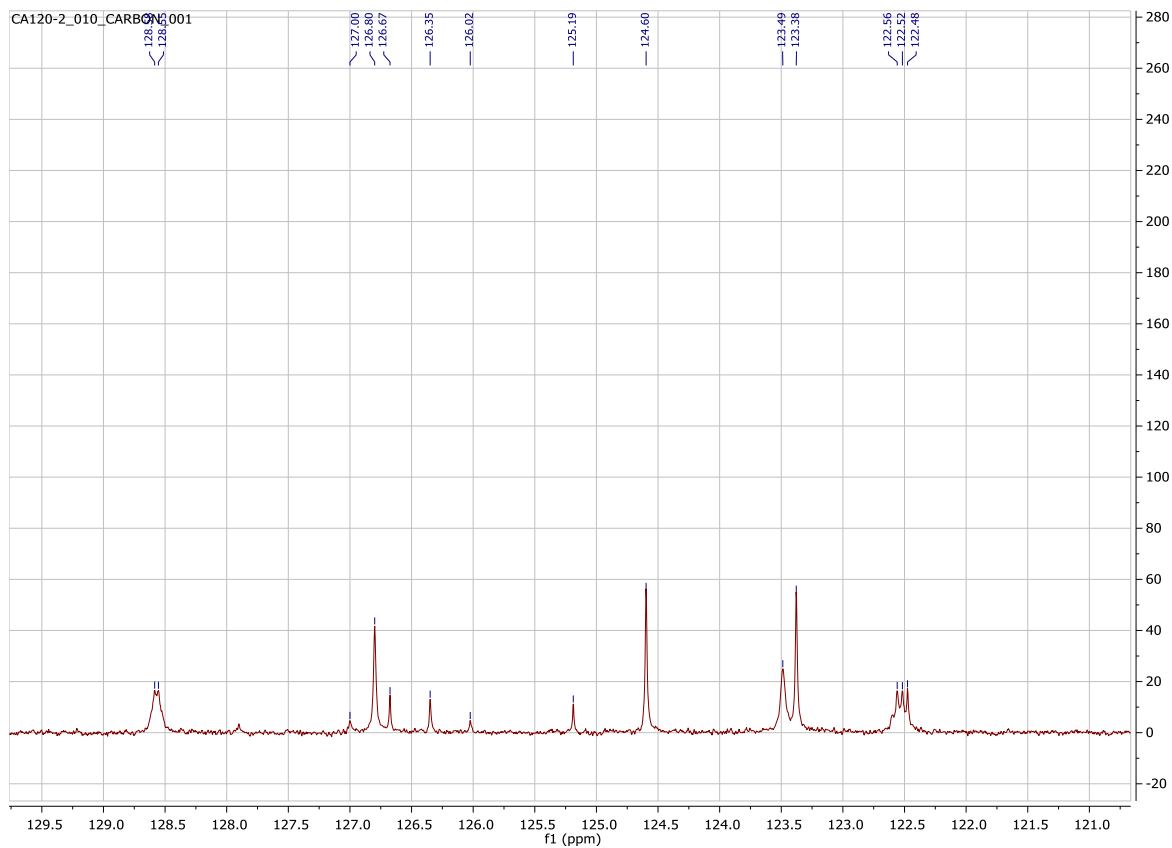

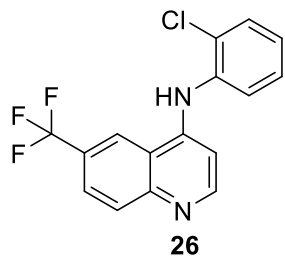

*N*-(2-Chlorophenyl)-6-(trifluoromethyl)quinolin-4-amine (**26**)

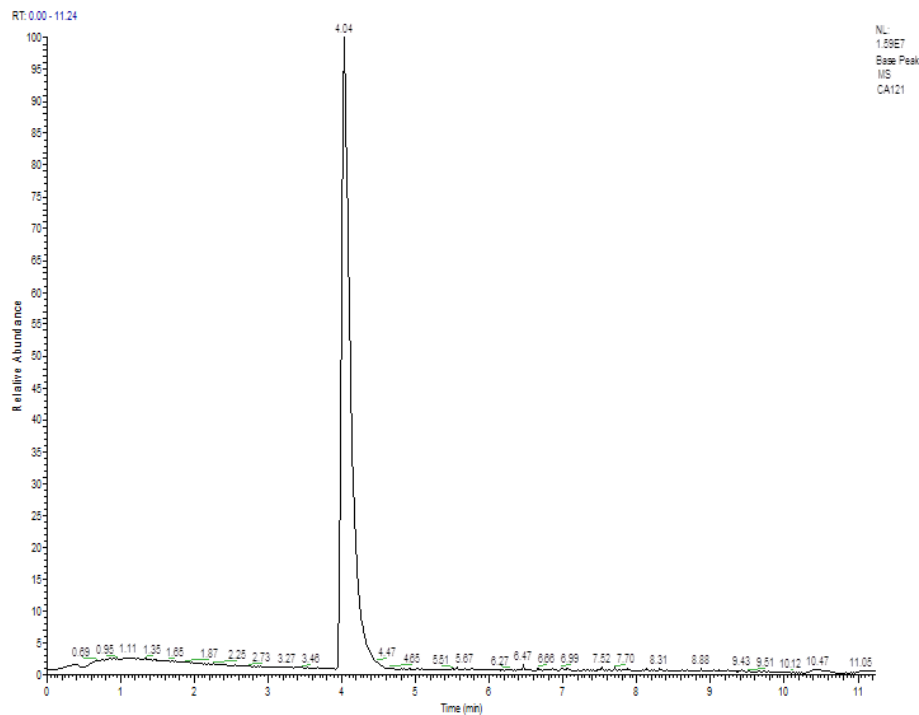

CA1214248-274 RT: 3.90433 AV: 29 NL: 5.0358  
T.FTMS+p ESIFullms [100.00-2000.00]

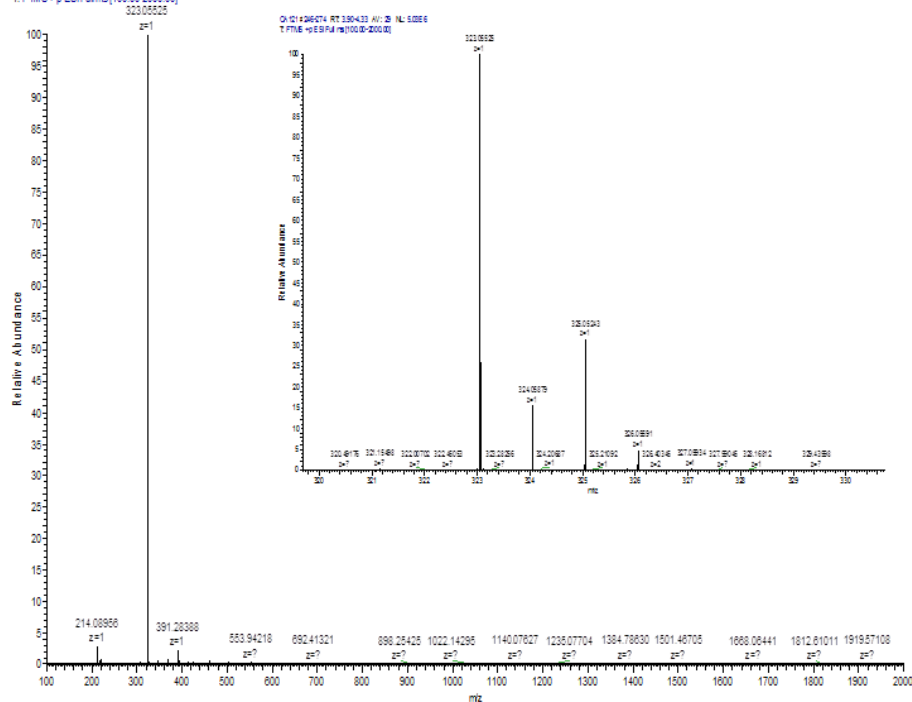

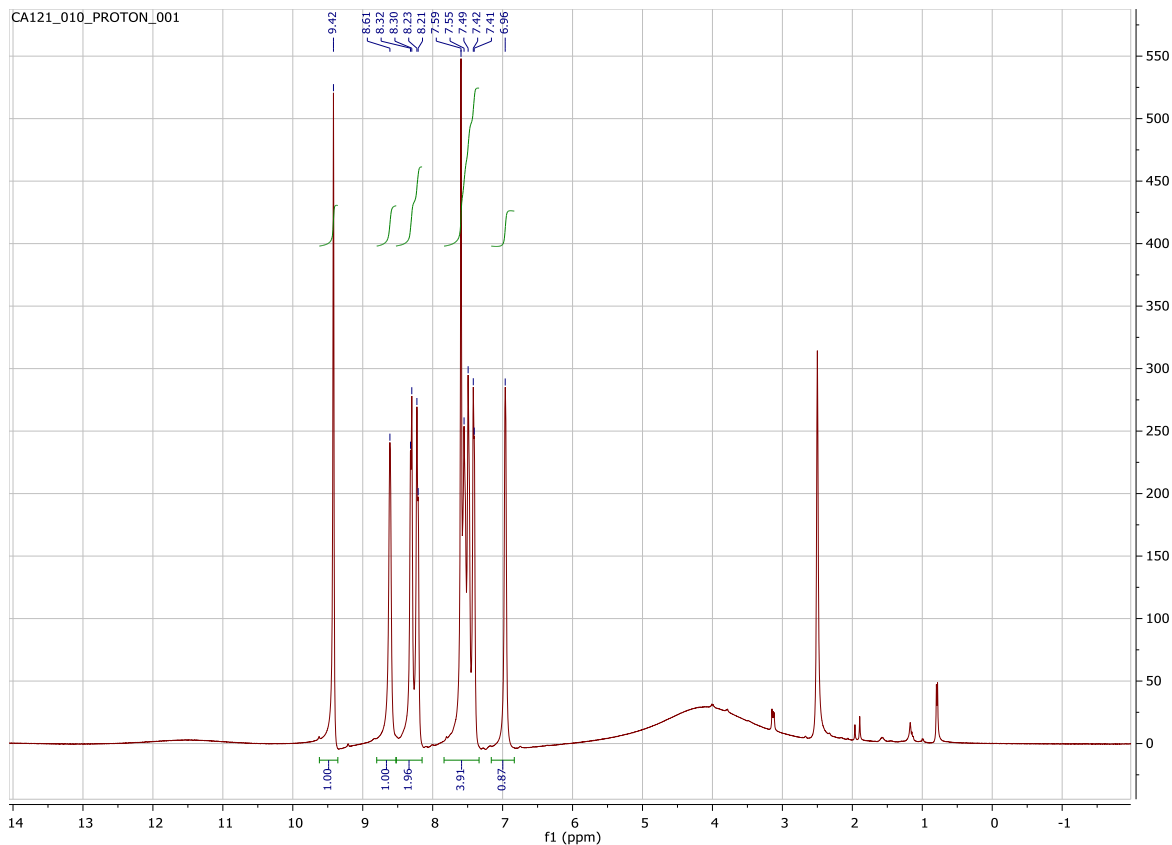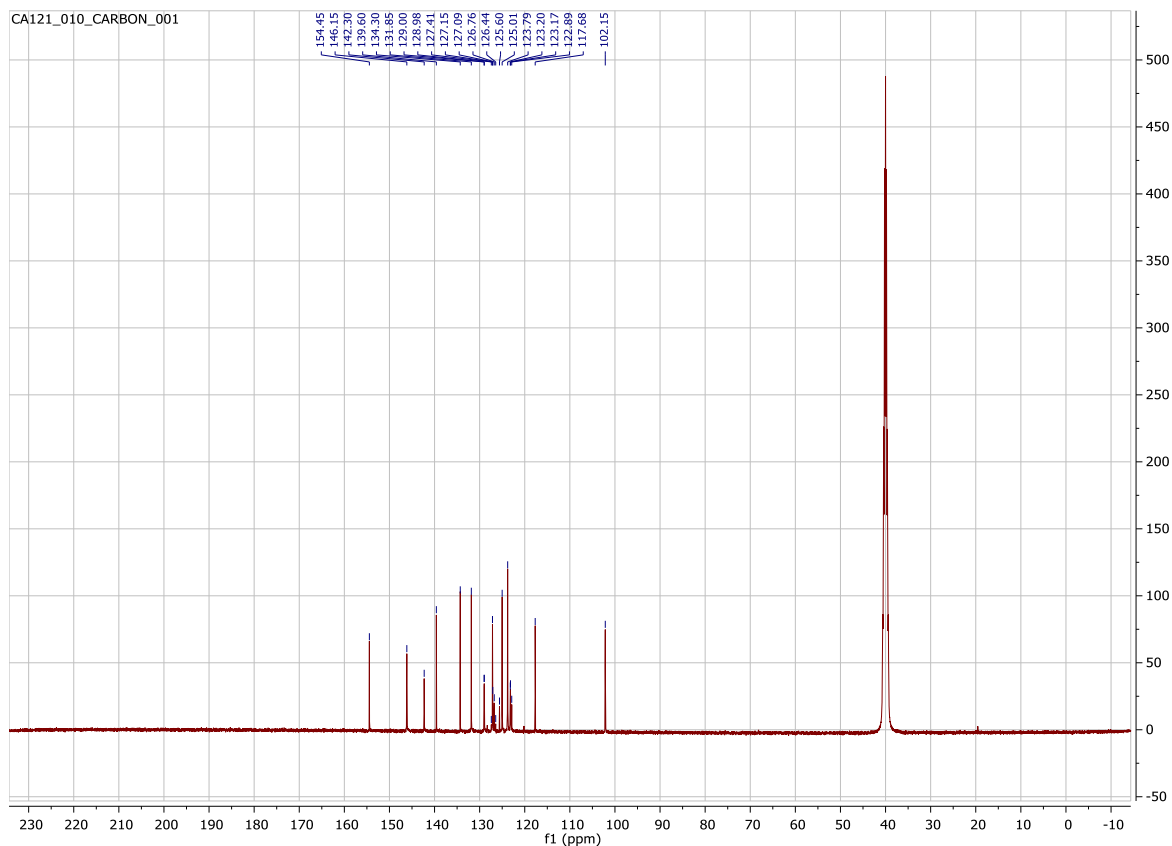

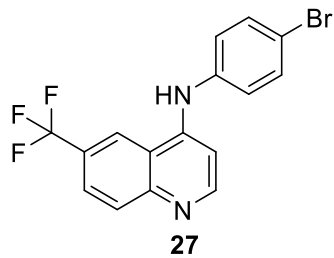

*N*-(4-Bromophenyl)-6-(trifluoromethyl)quinolin-4-amine (**27**)

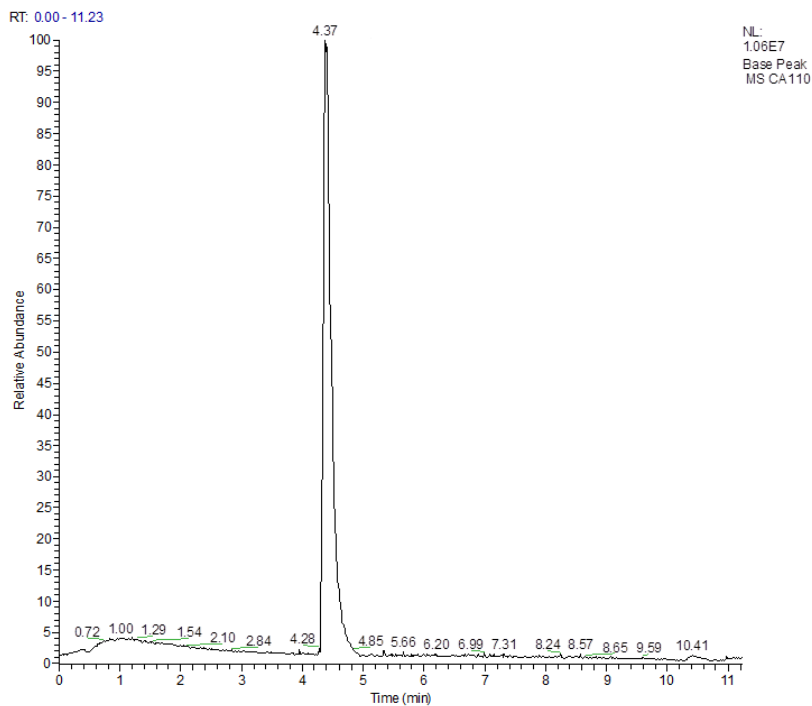

CA11C #260-301 RT: 4.14-4.79 AV: 42 NL: 278E6  
T: FTMS + pESIFull.ms[100.00-2000.00]

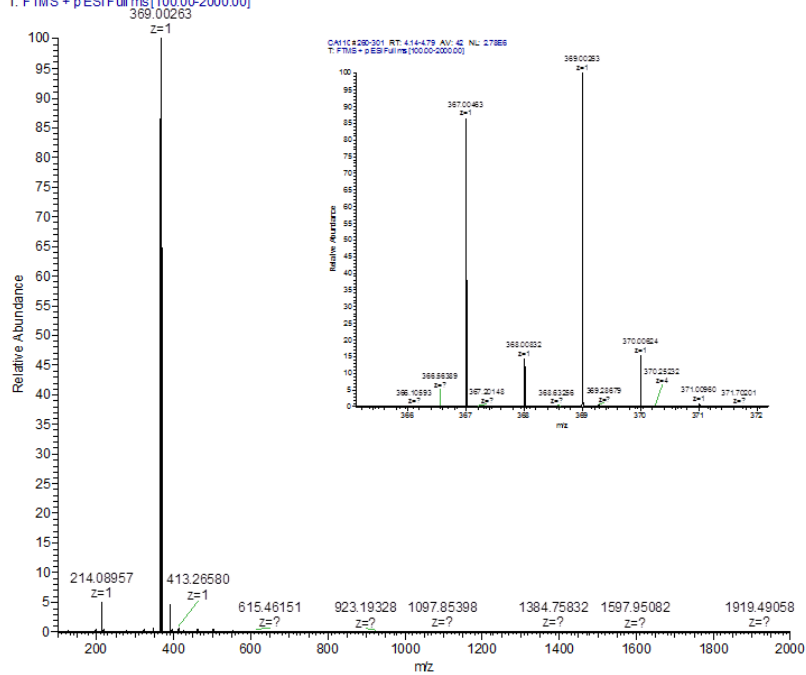

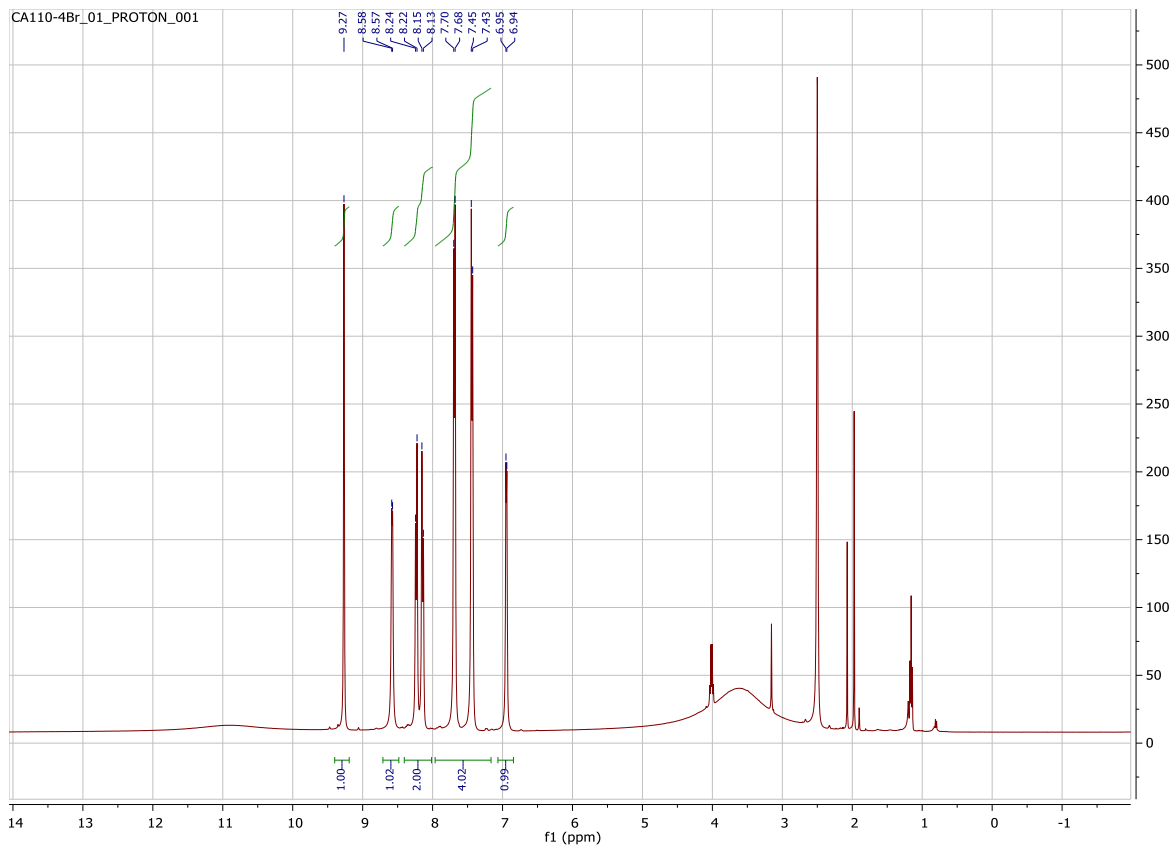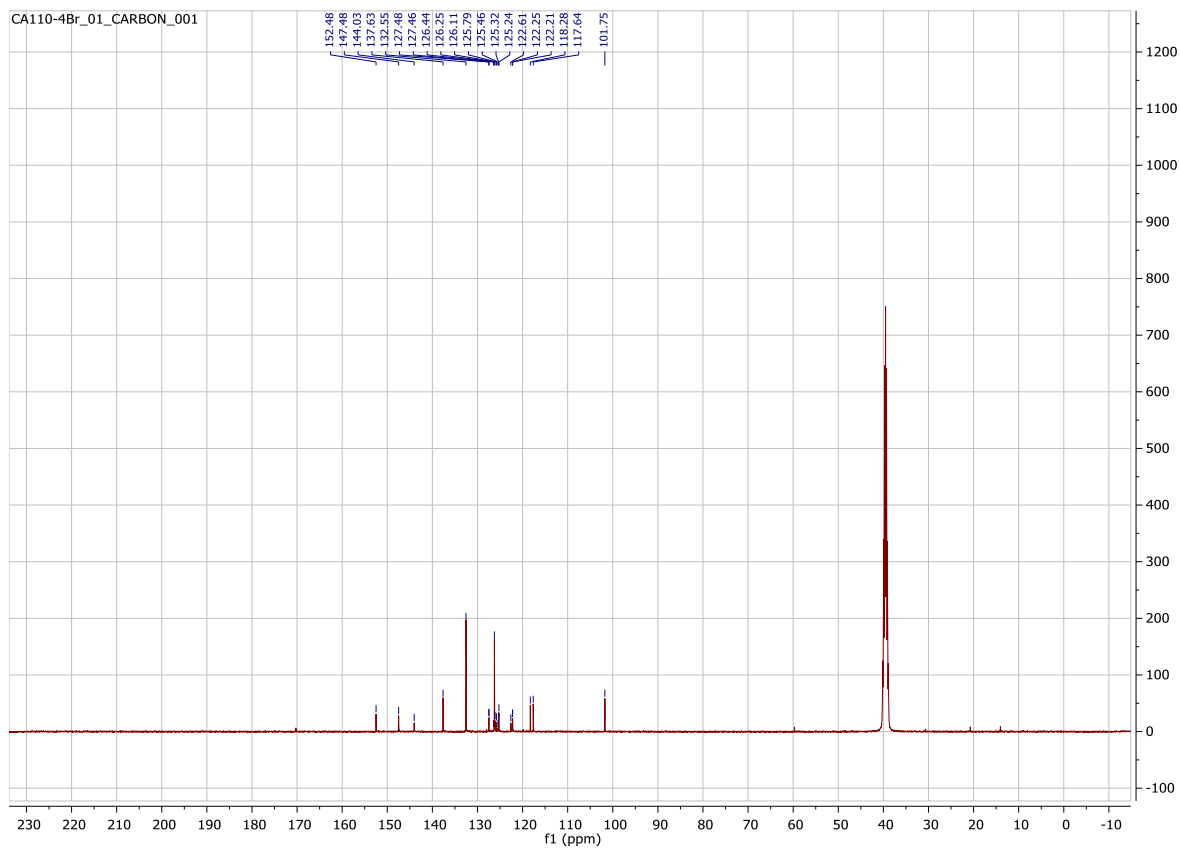



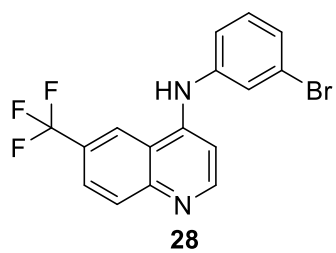

*N*-(3-Bromophenyl)-6-(trifluoromethyl)quinolin-4-amine (**28**)

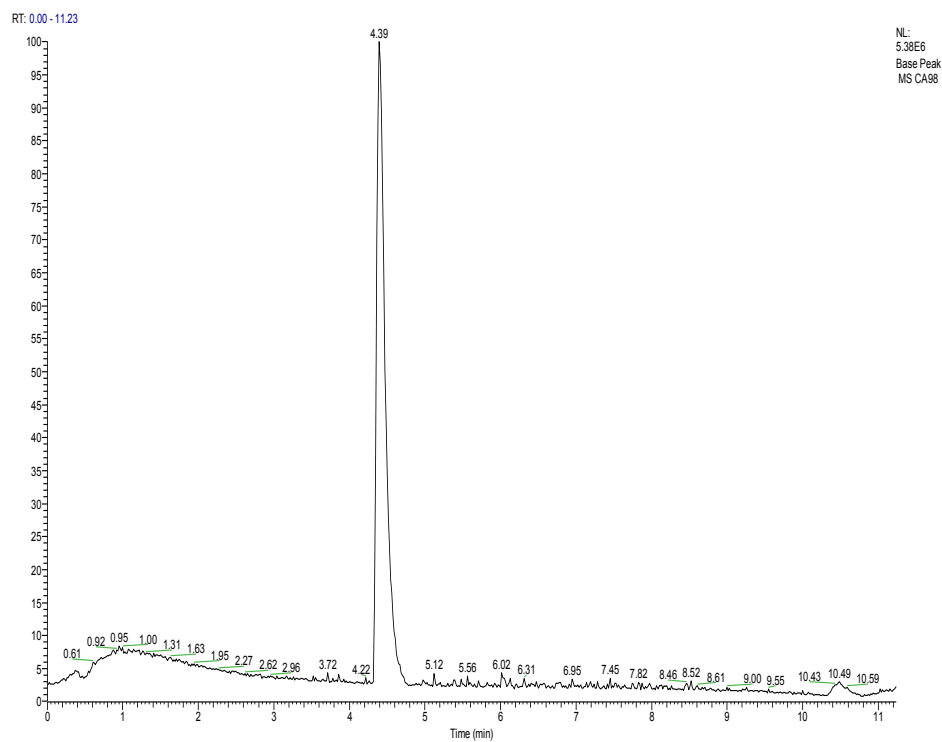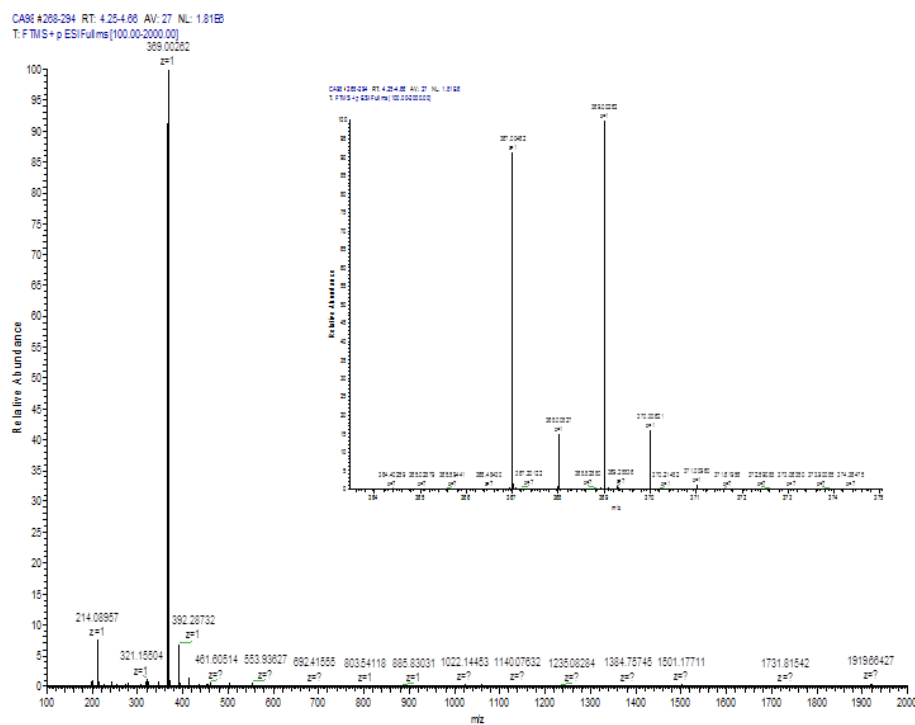

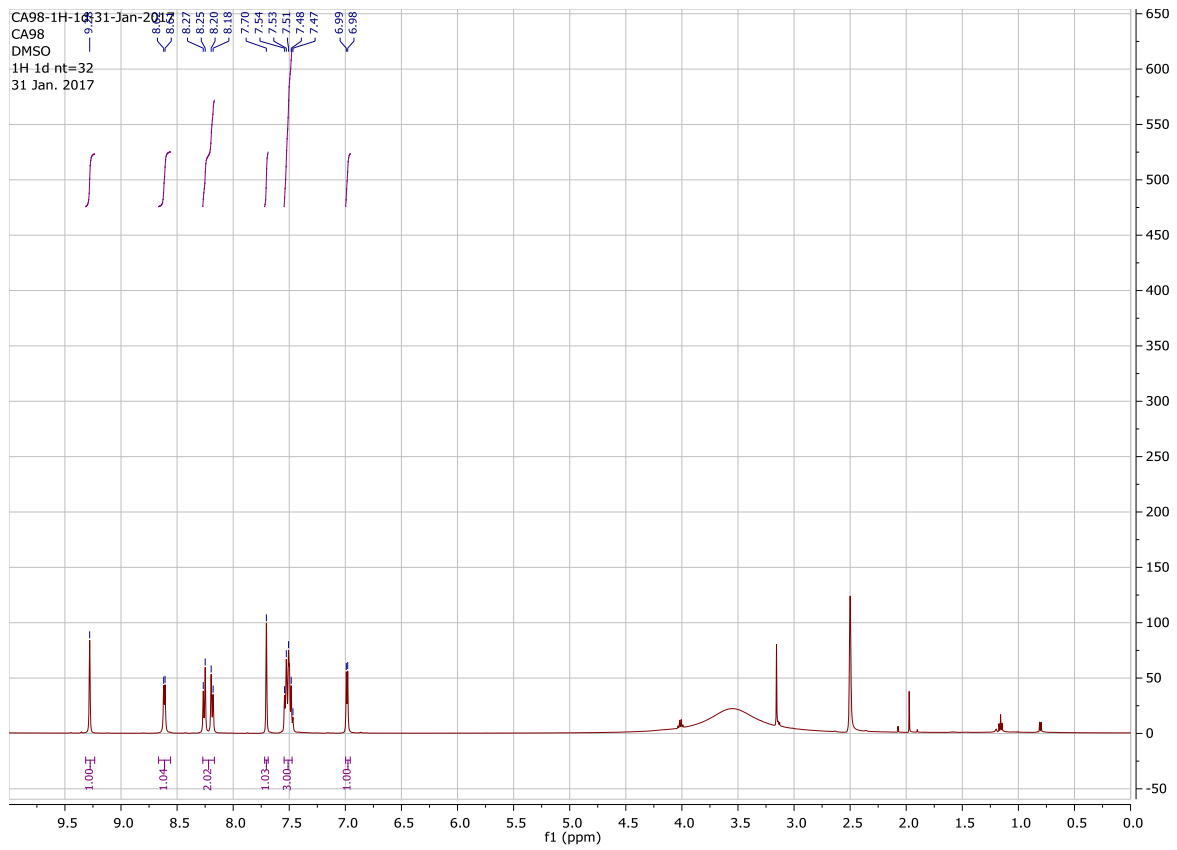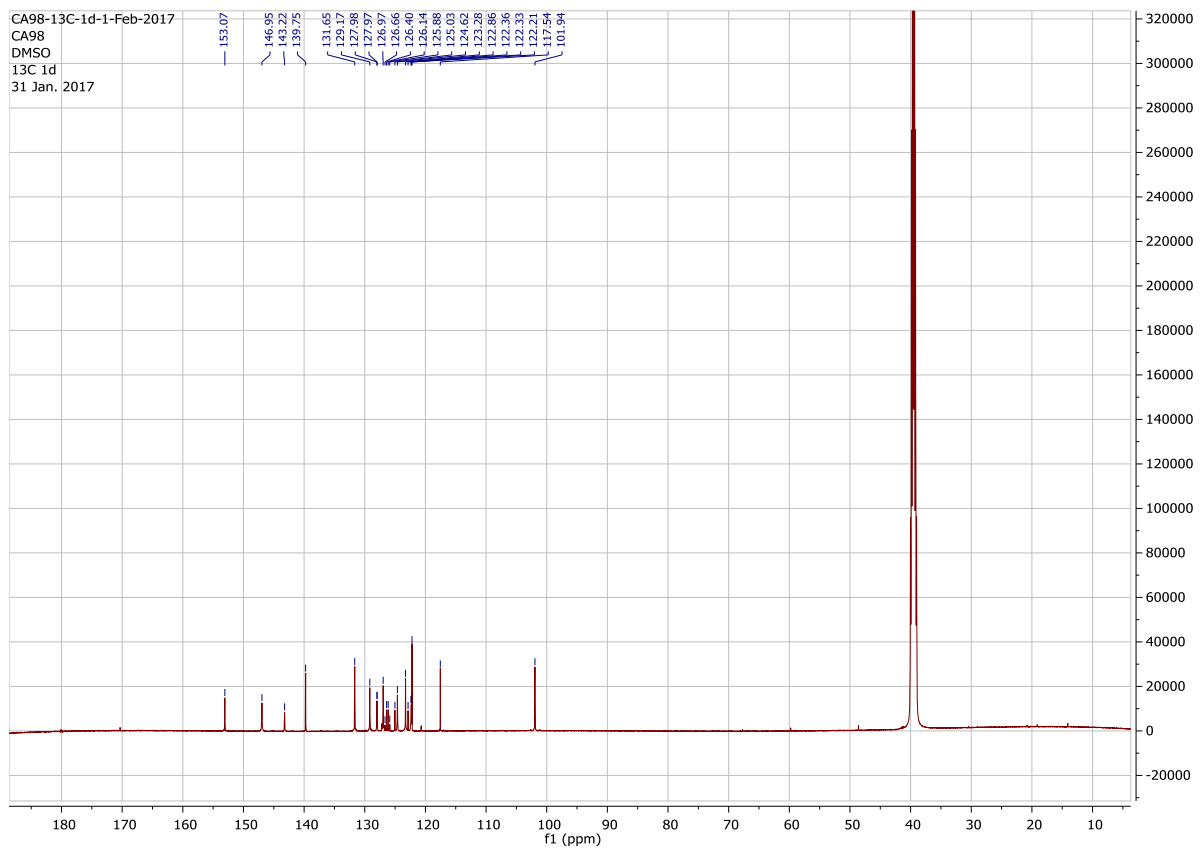

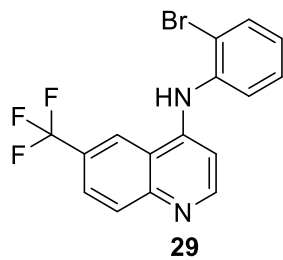

N-(2-Bromophenyl)-6-(trifluoromethyl)quinolin-4-amine (**29**)

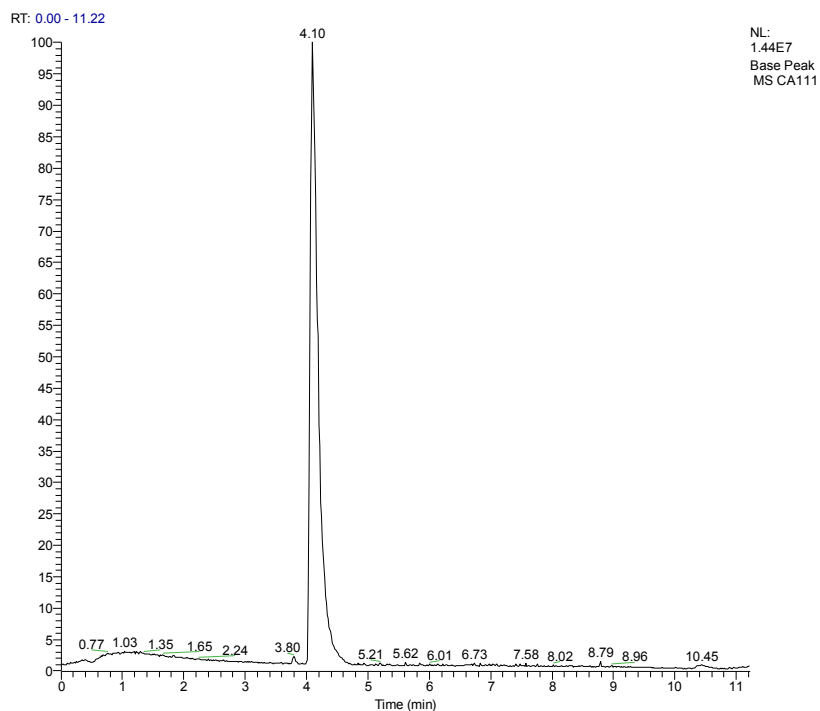

CA111#249-279 RT: 3.96-4.42 AV: 31 NL: 4.77E6  
T: FTMS + pESI Full ms [100.00-2000.00]

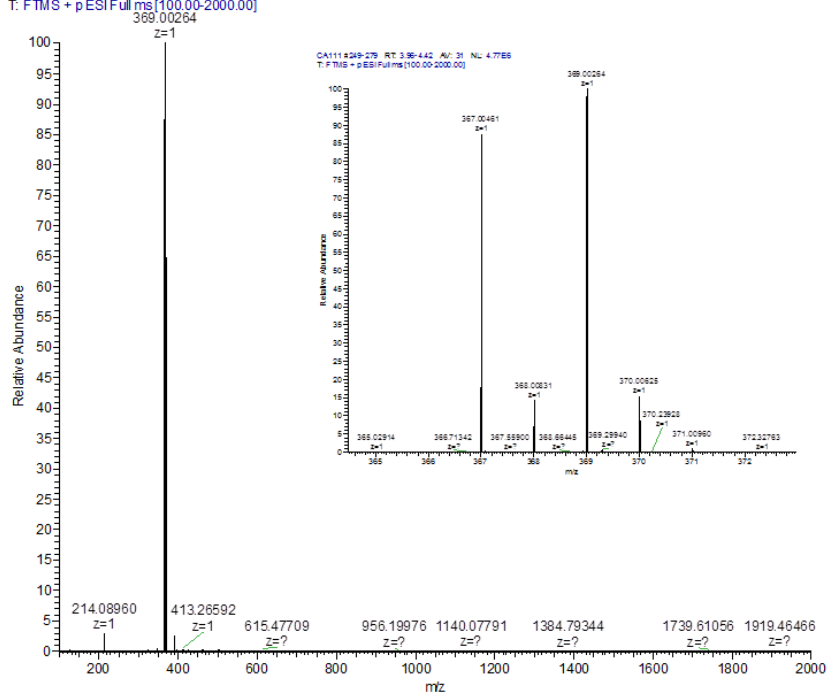

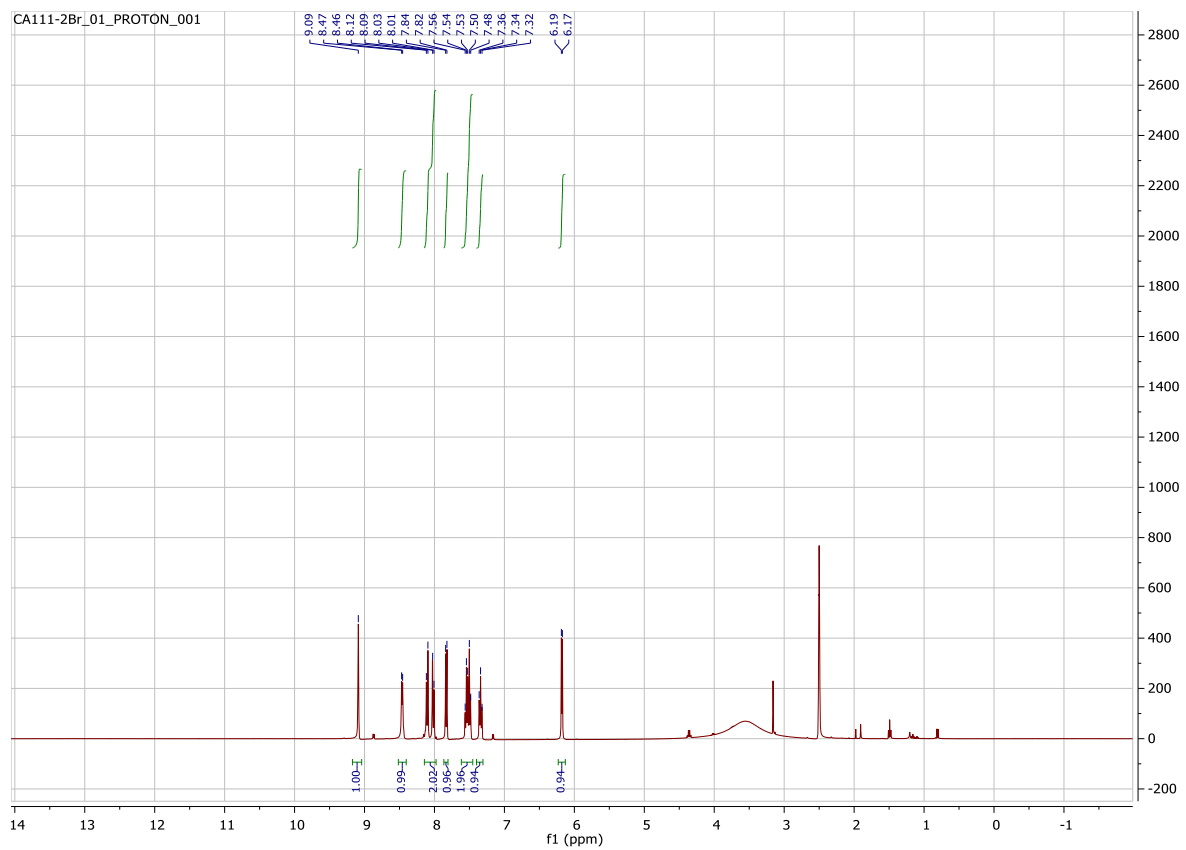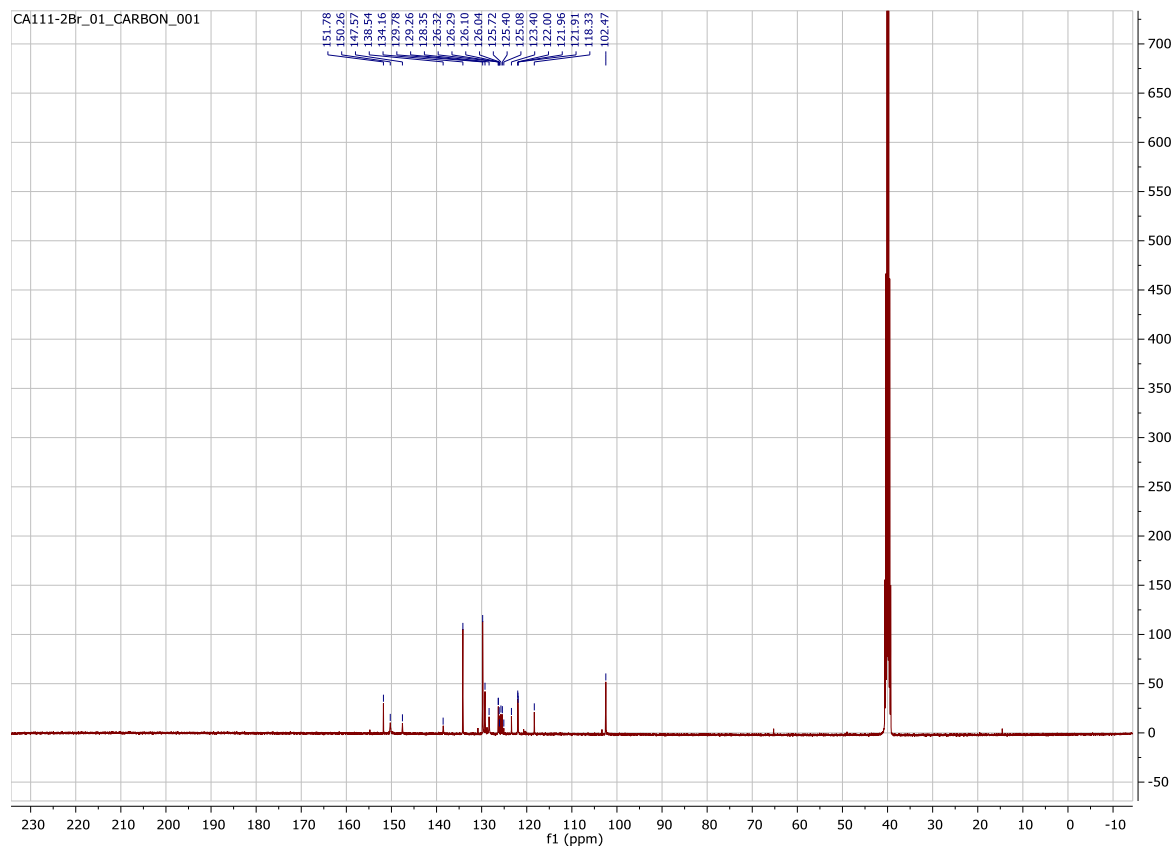



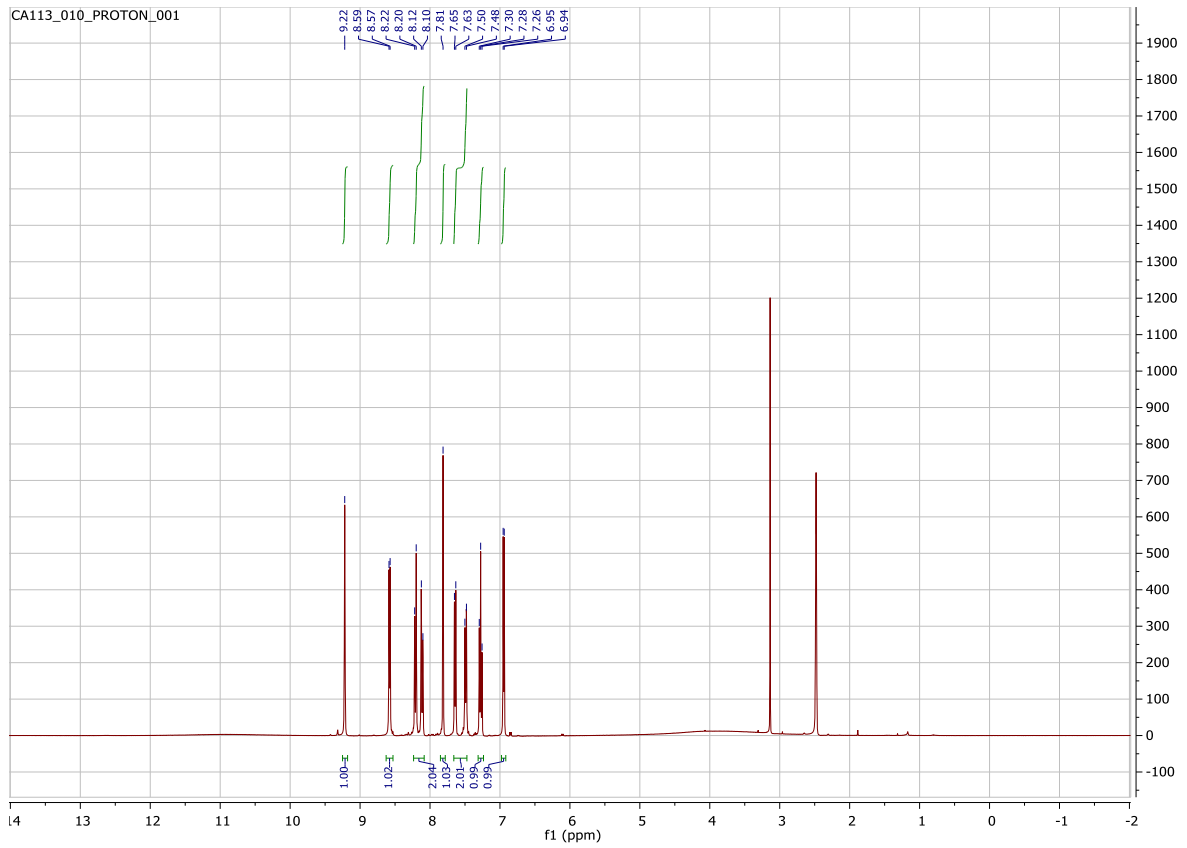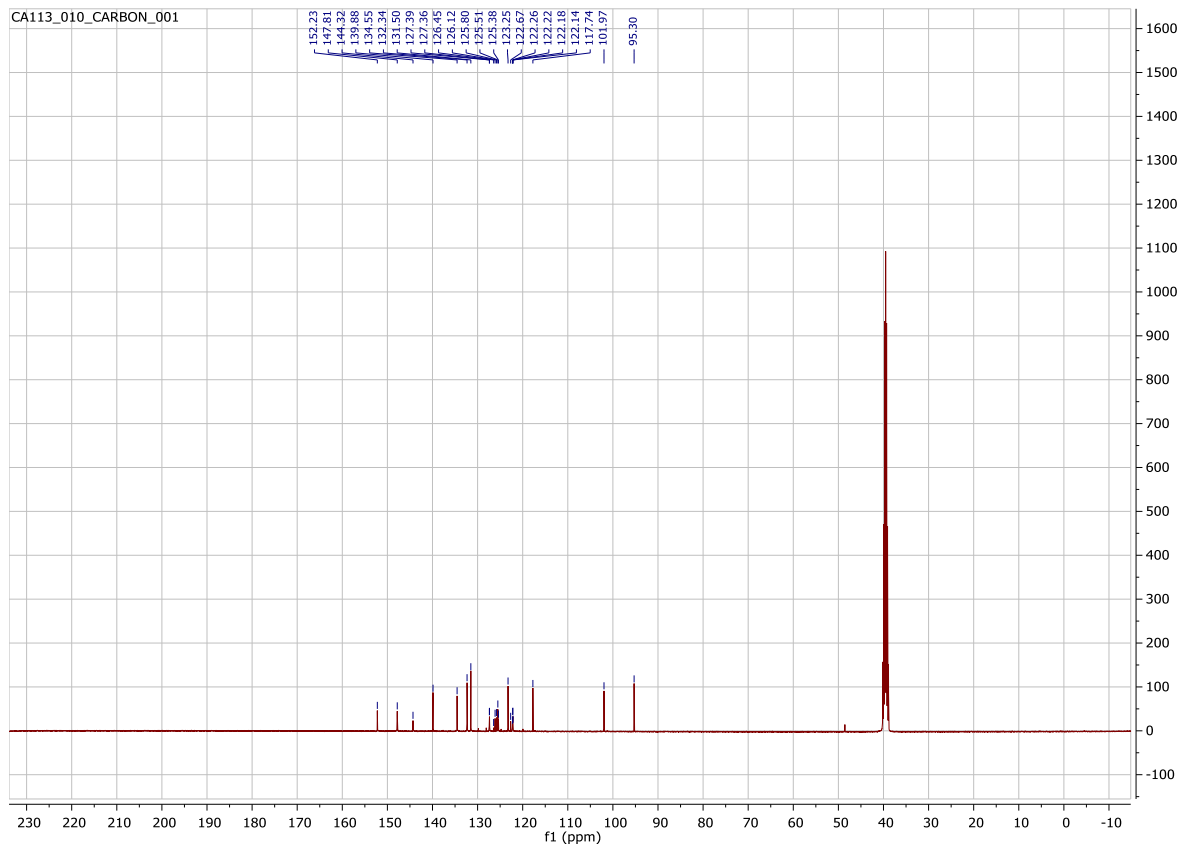

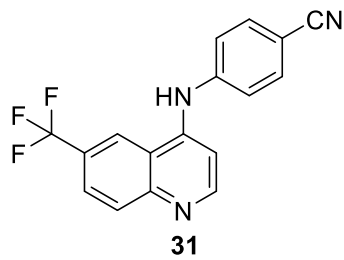

4-((6-(Trifluoromethyl)quinolin-4-yl)amino)benzonitrile (**31**)

RT: 0.00 - 11.24

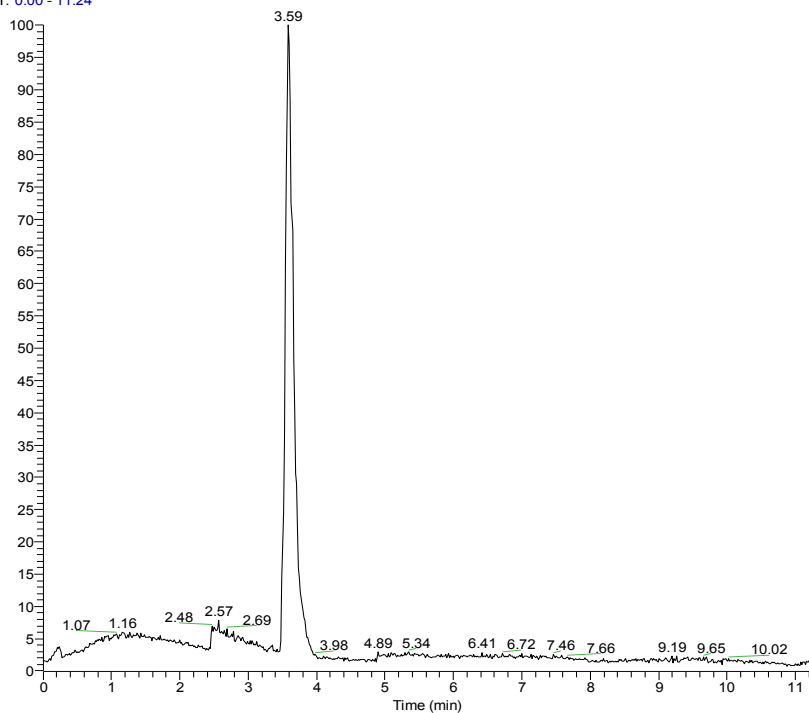

NL:  
8.32E6  
Base Peak  
MS CA89

CA89 #223-245 RT: 3.42-3.75 AV: 23 NL: 3.35E6  
T: FTMS + pESI Full ms [100.00-2000.00]

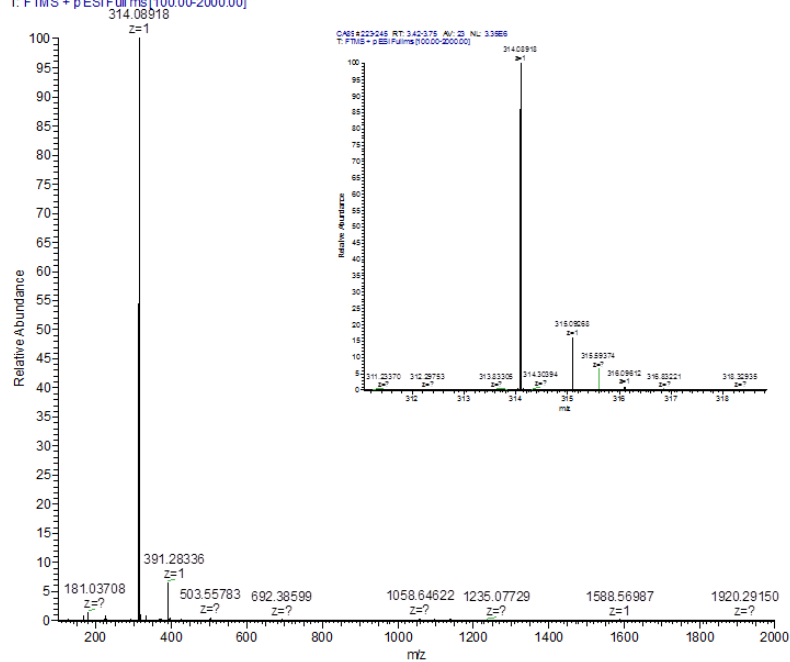

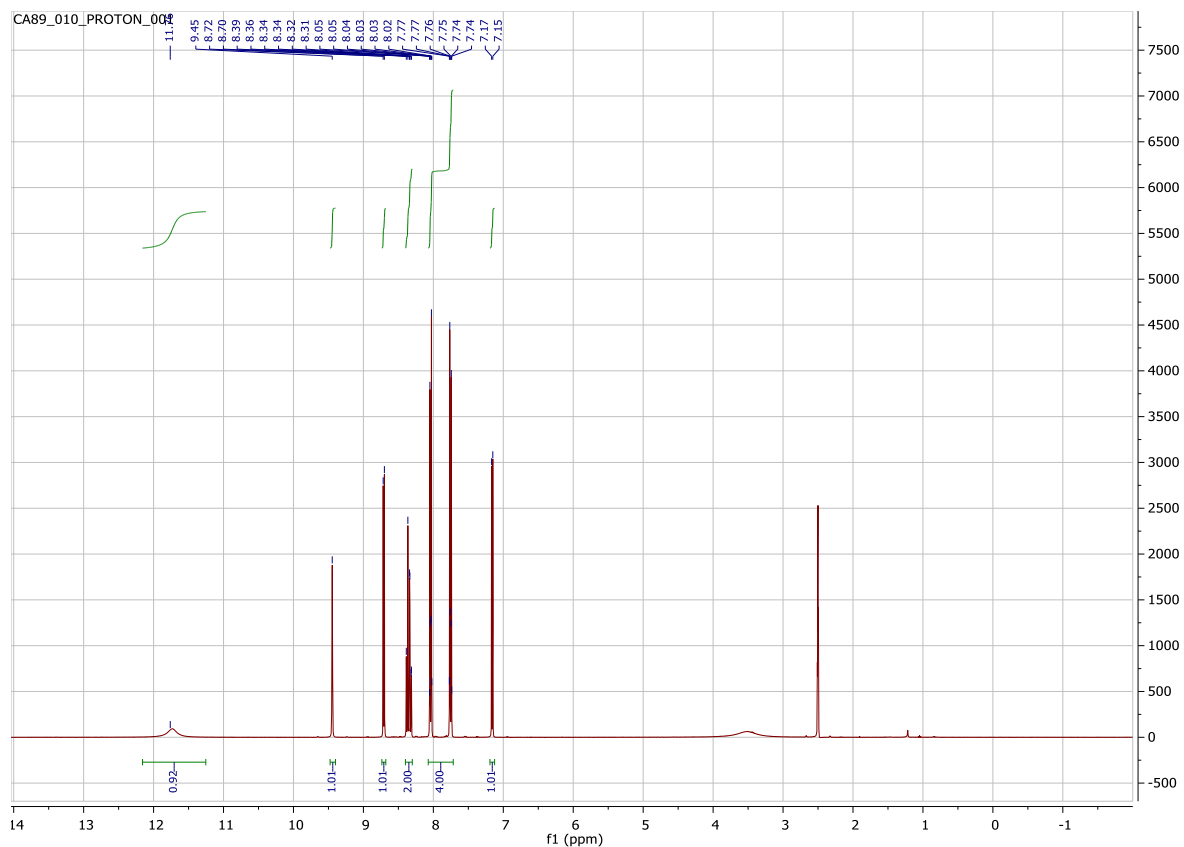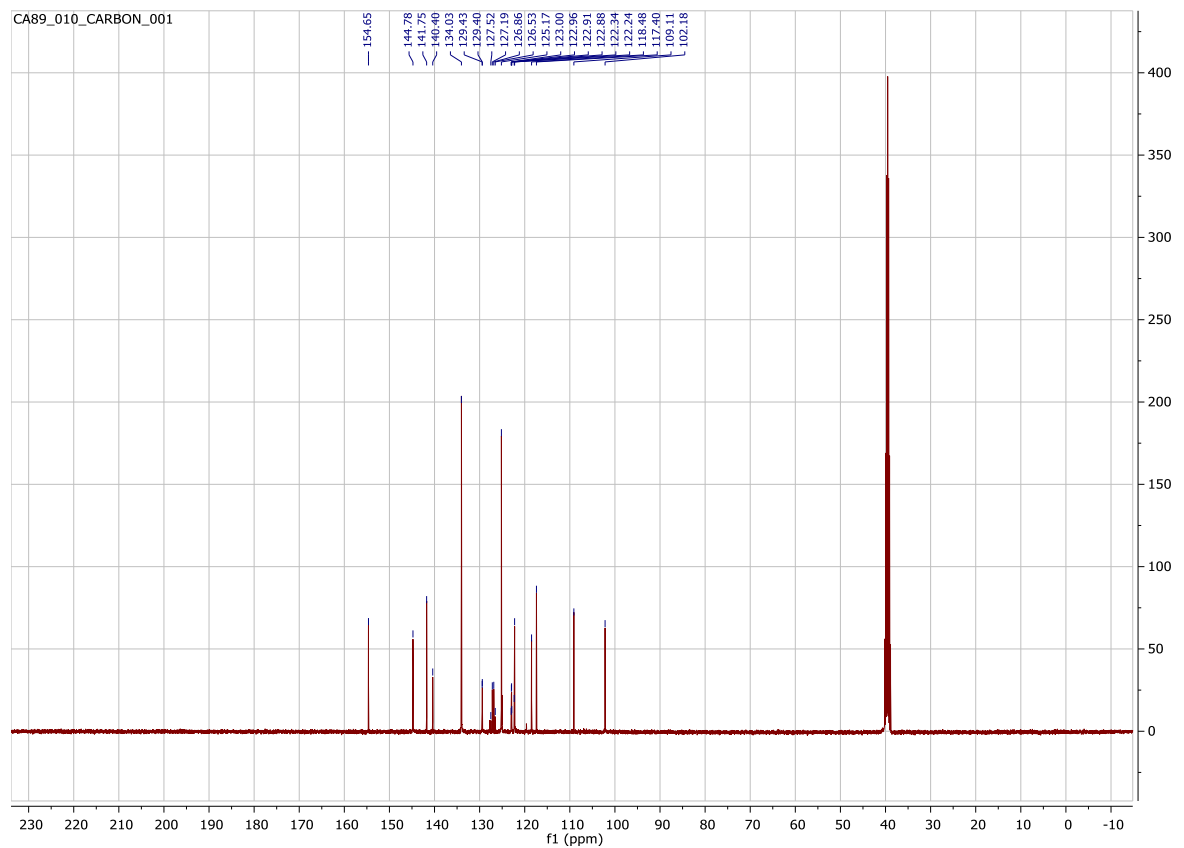



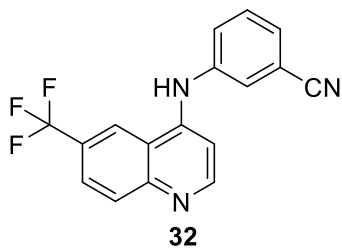

3-((6-(Trifluoromethyl)quinolin-4-yl)amino)benzonitrile (**32**)

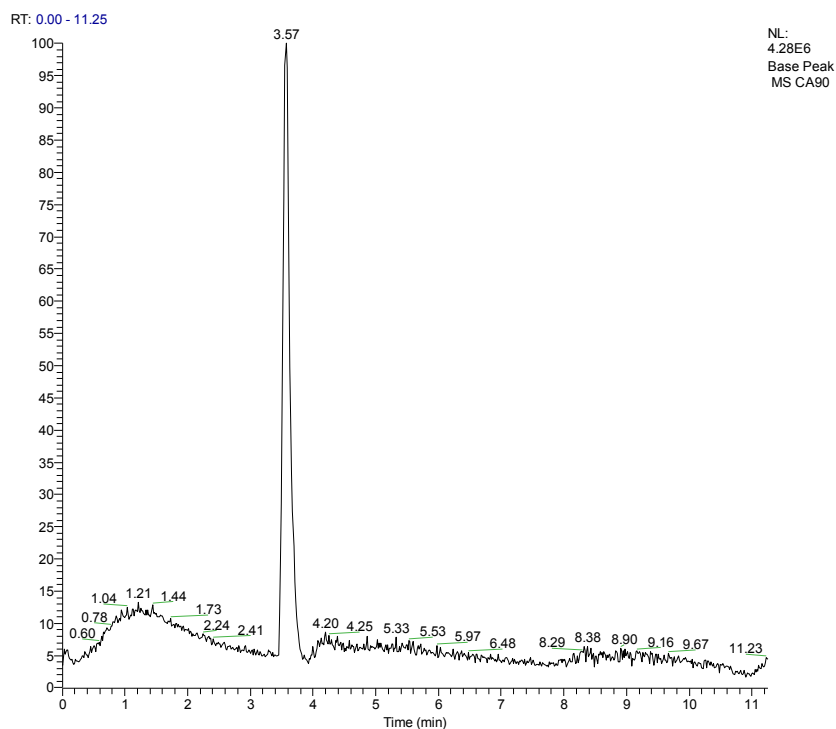

CA90 #221-246 RT: 3.39-3.77 AV: 26 NL: 1.50E6  
T: FTMS - p ESI Full.ms [100.00-2000.00]

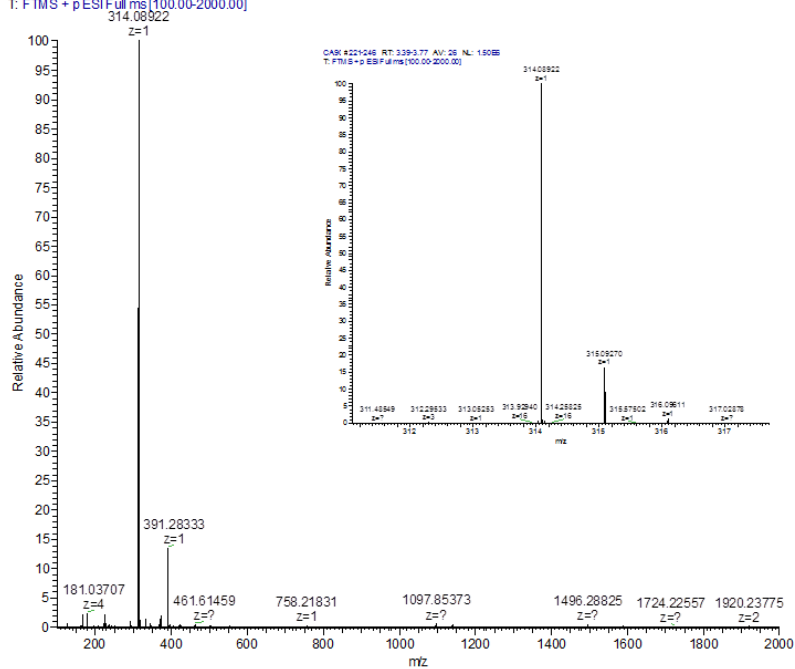

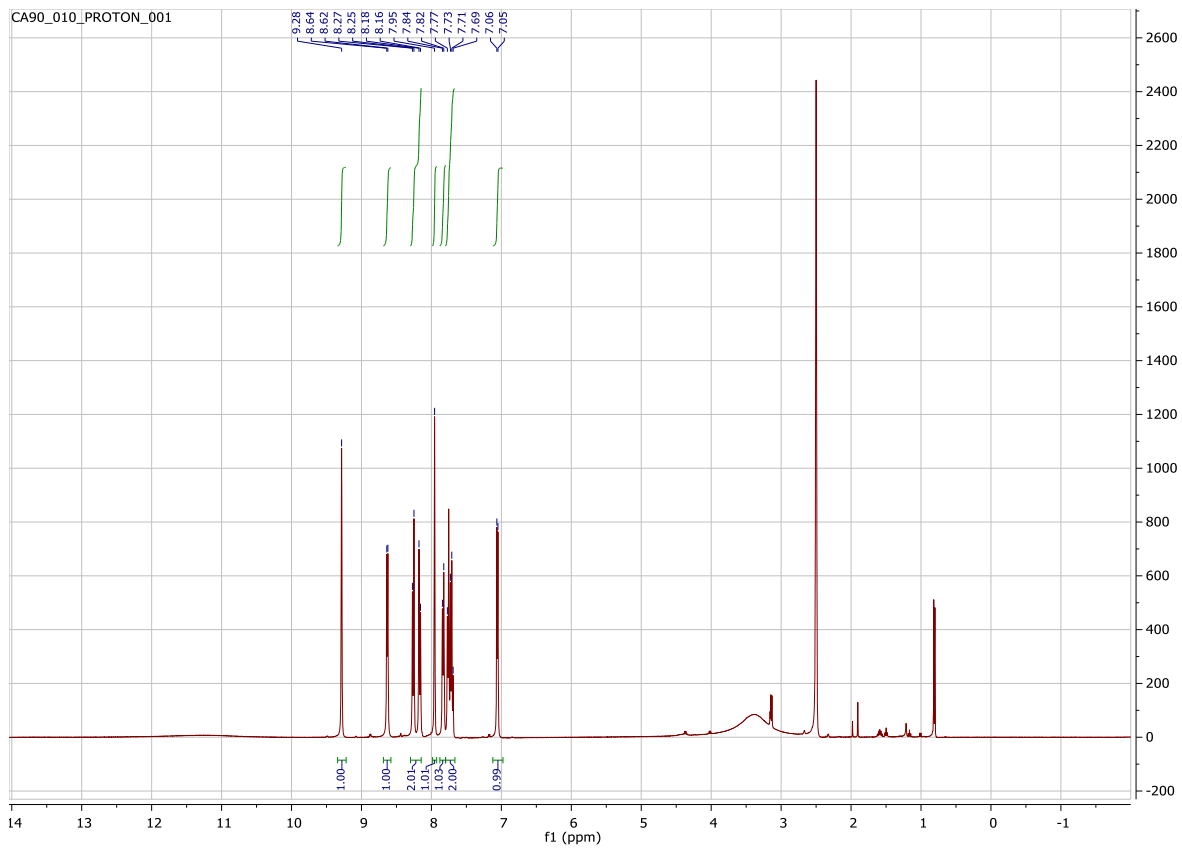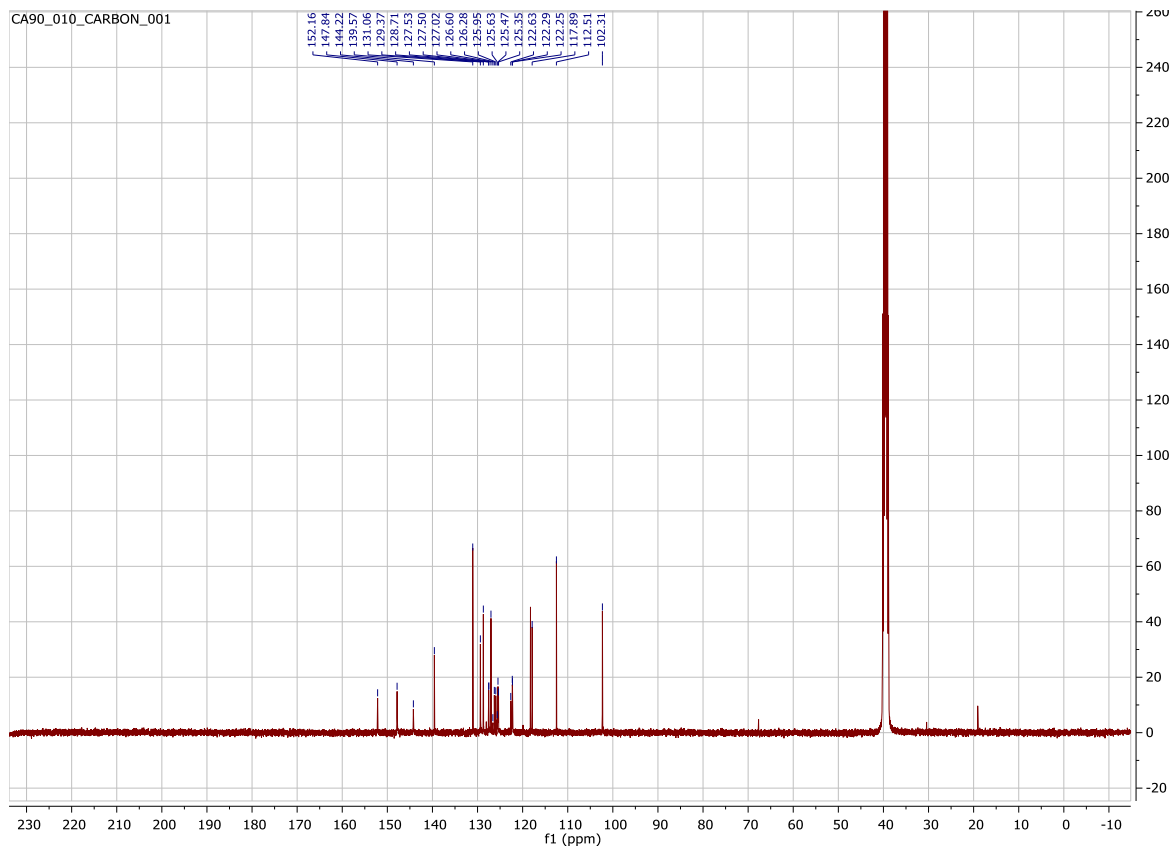

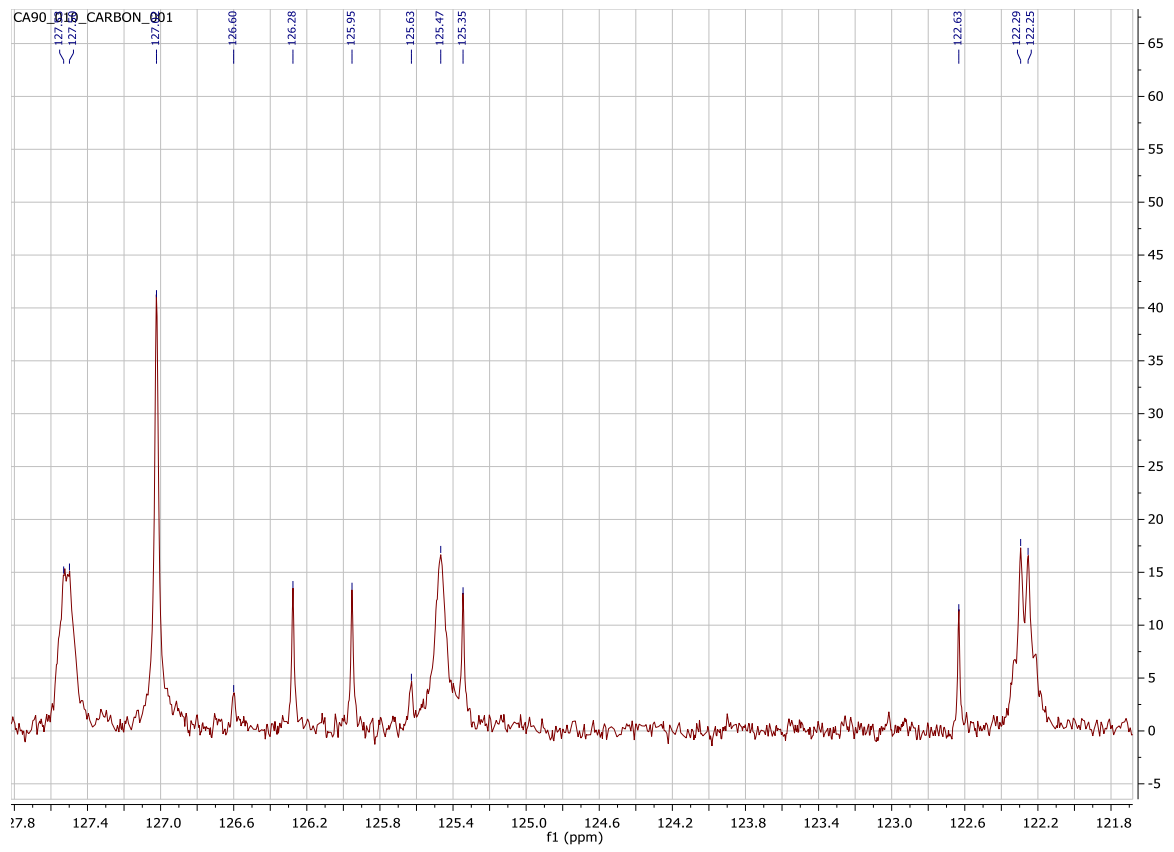

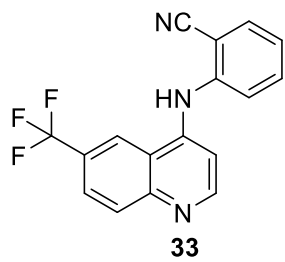

2-((6-(Trifluoromethyl)quinolin-4-yl)amino)benzonitrile (**33**)

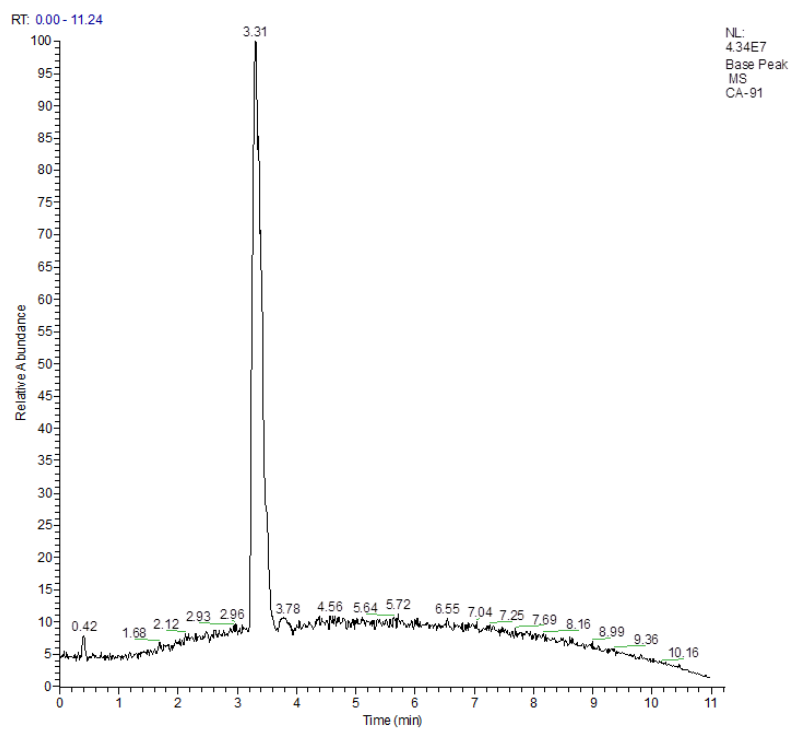

CA-91#208-240 RT: 3.11-3.59 AV: 33 NL: 1.73E7  
T: FTMS + p ESI Full ms [100.00-2000.00]

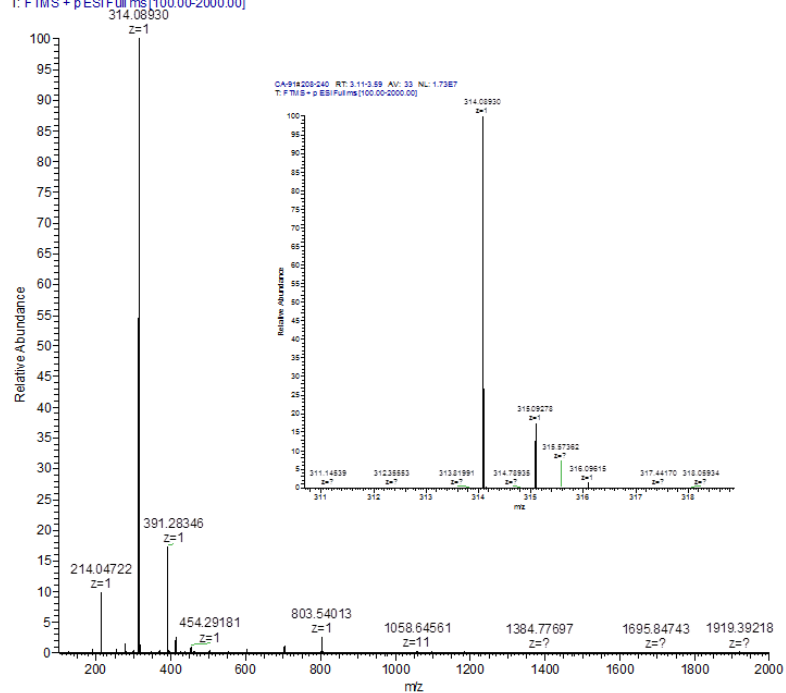

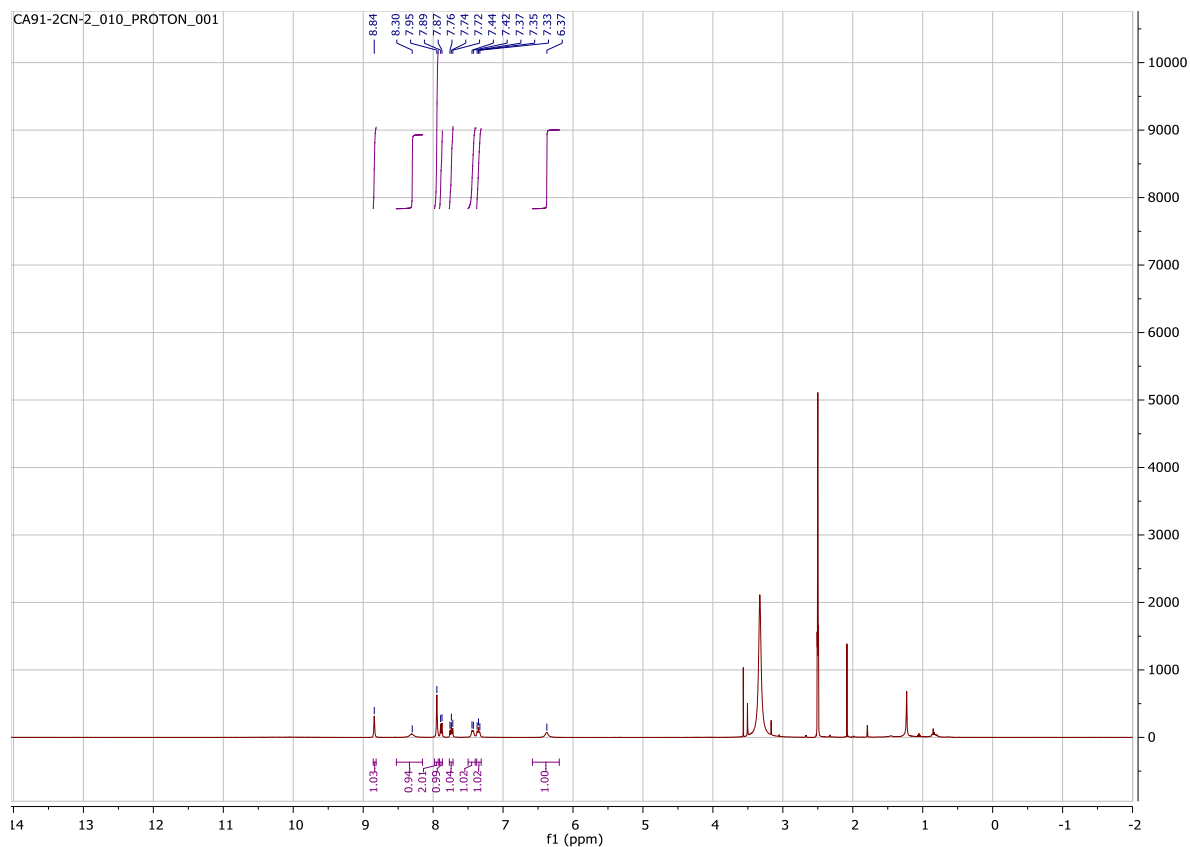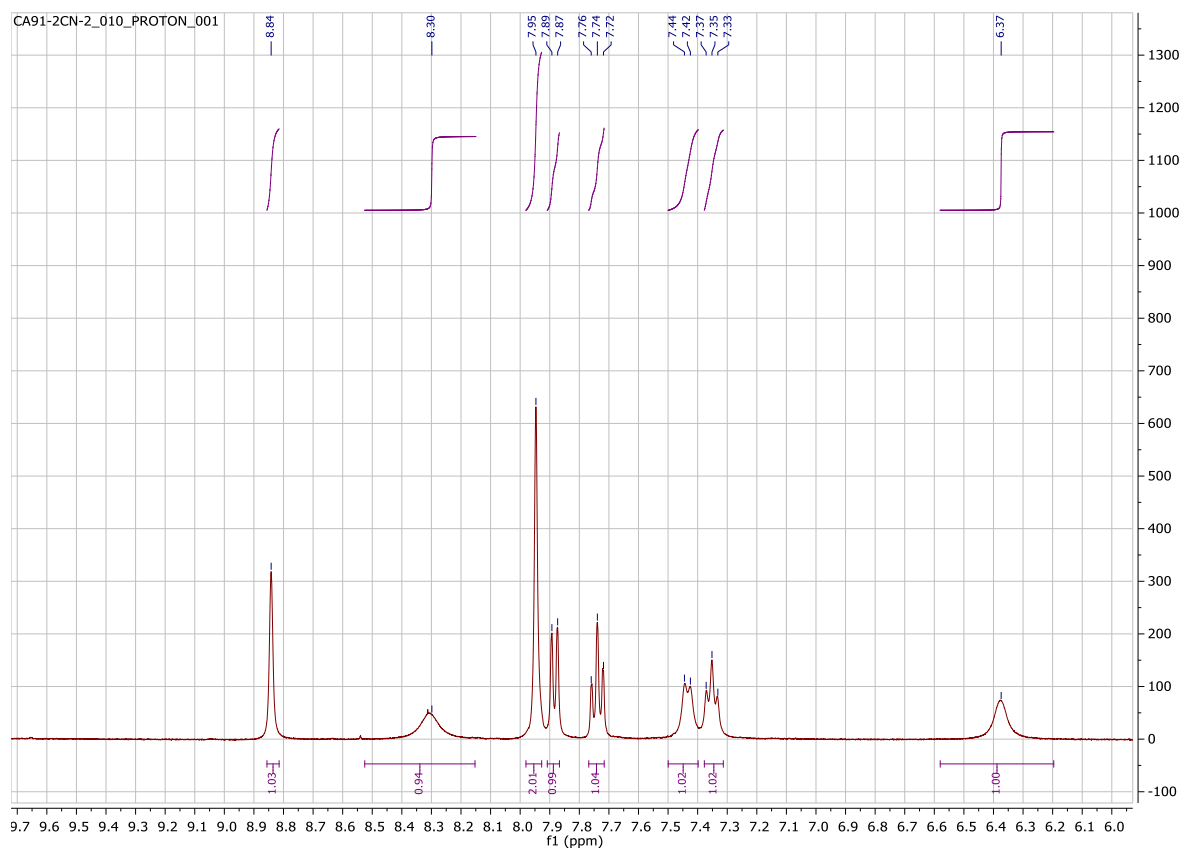

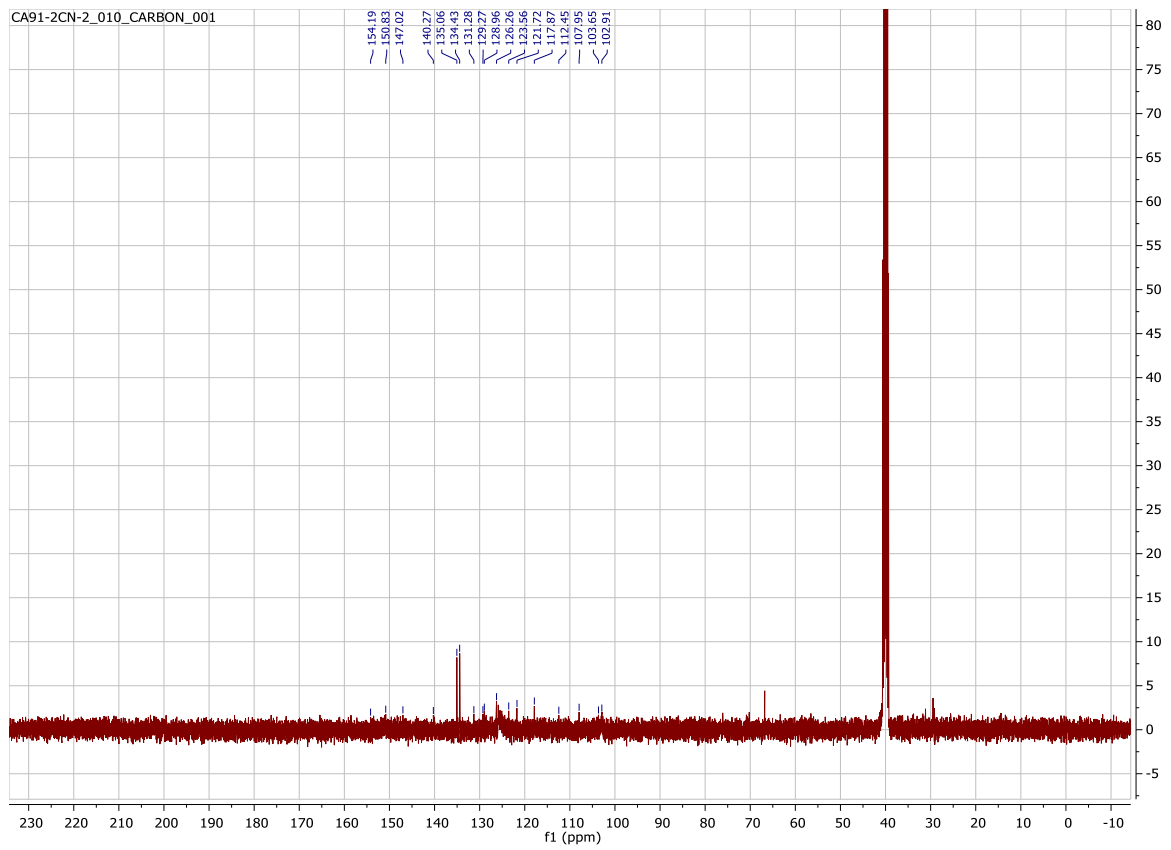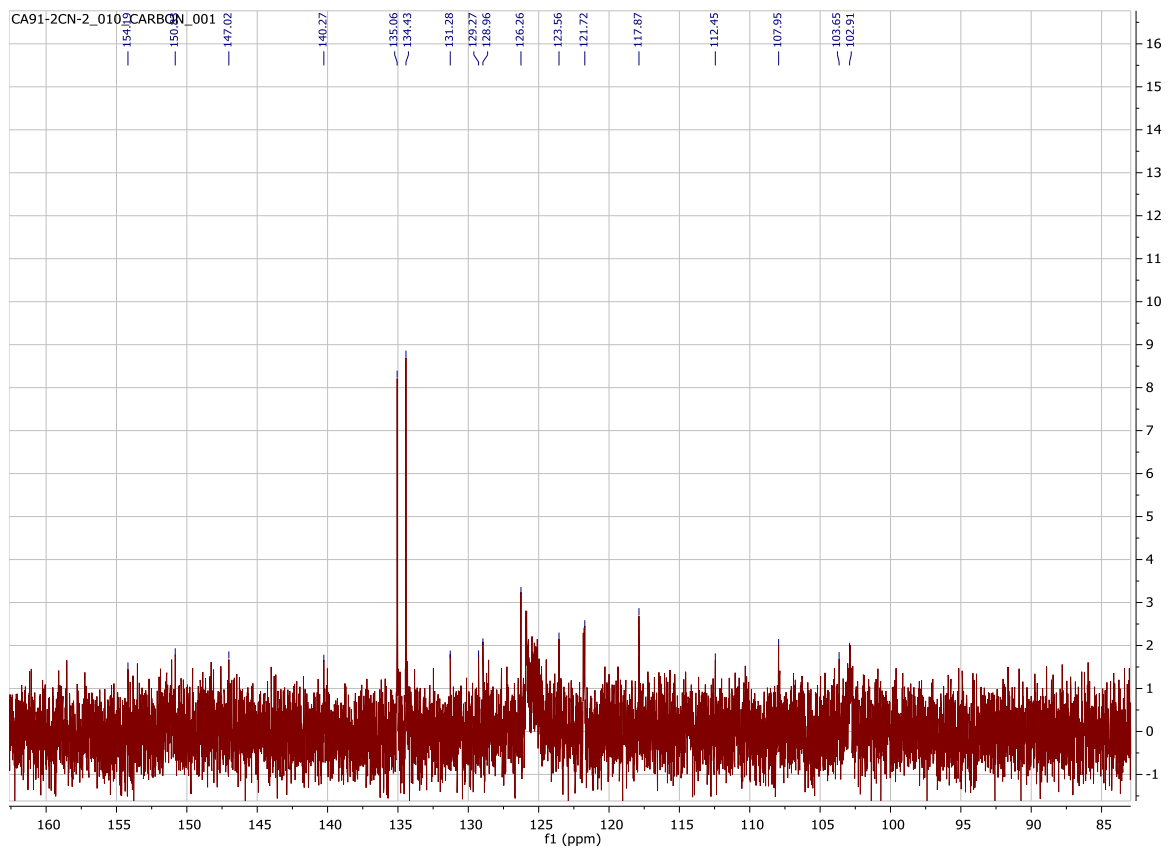

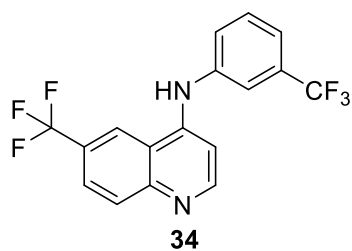

6-(Trifluoromethyl)-N-(3-(trifluoromethyl)phenyl)quinolin-4-amine (**34**)

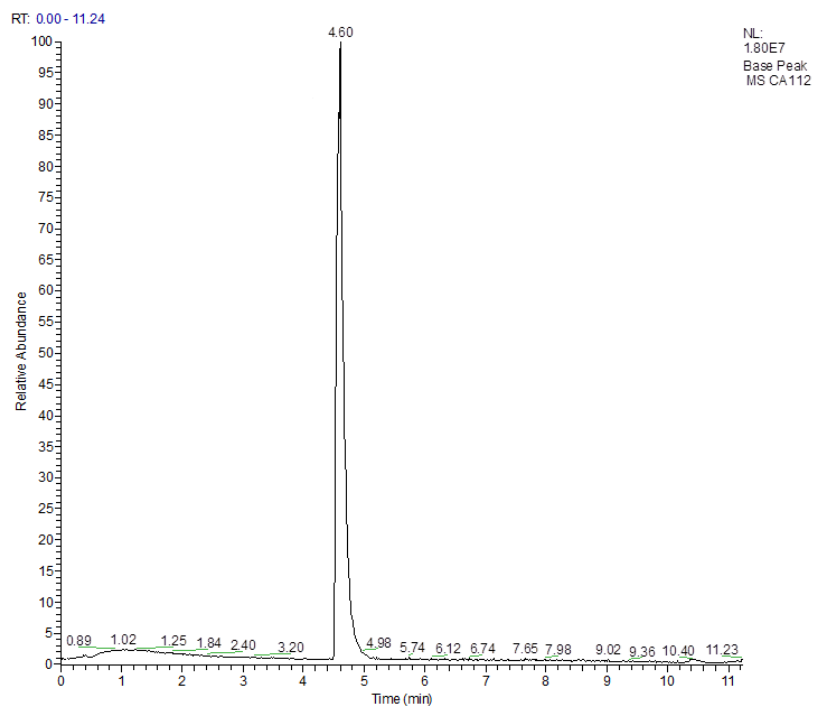

CA112 #279-305 RT: 4.45-4.85 AV: 27 NL: 5.89E6  
T: FTMS + pESI Full ms [100,00-2000,00]

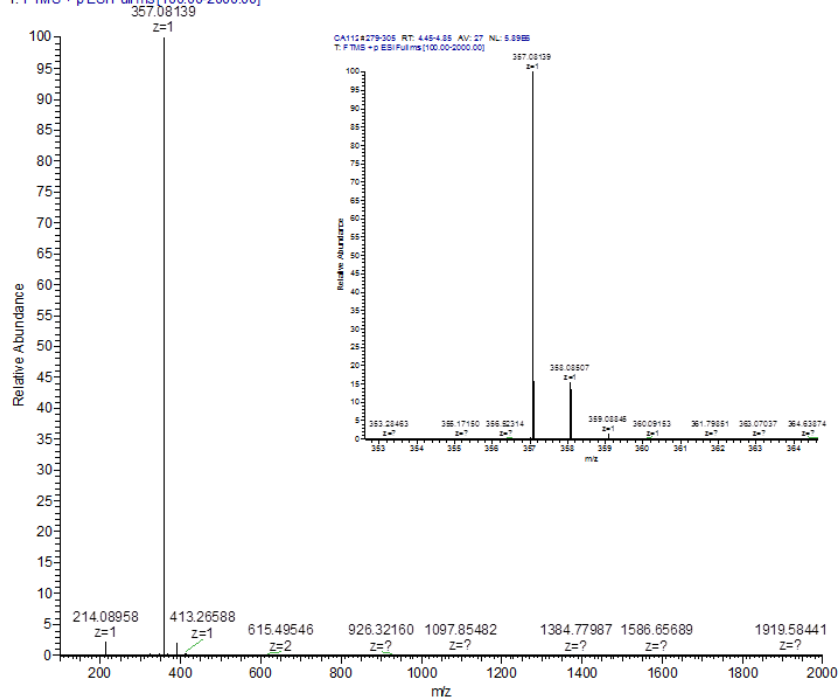

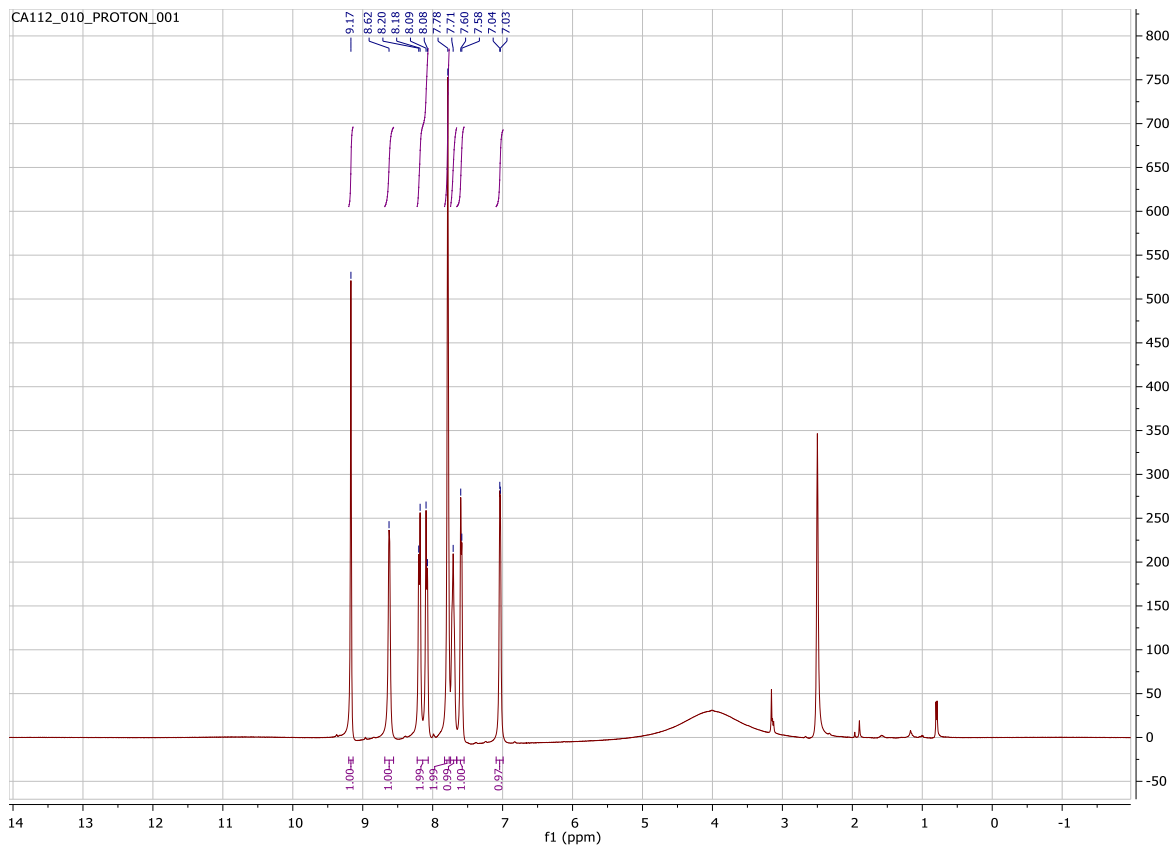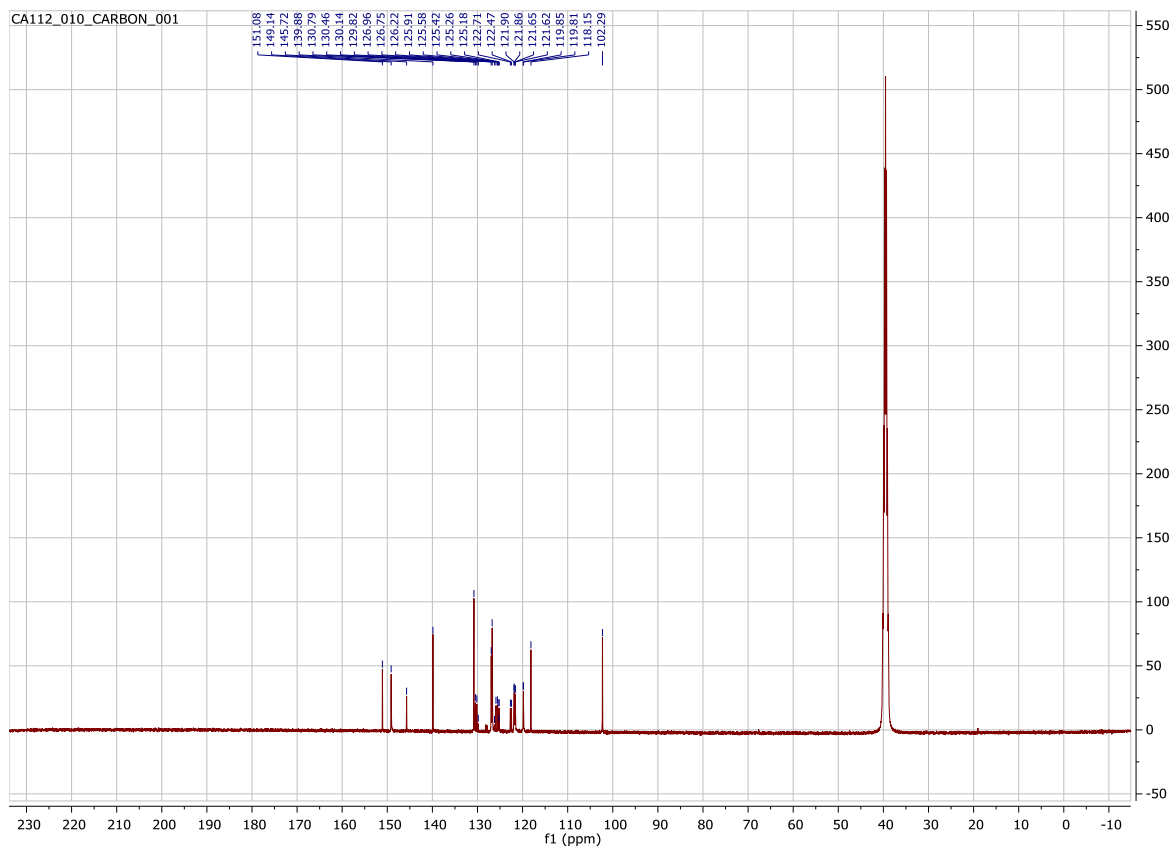



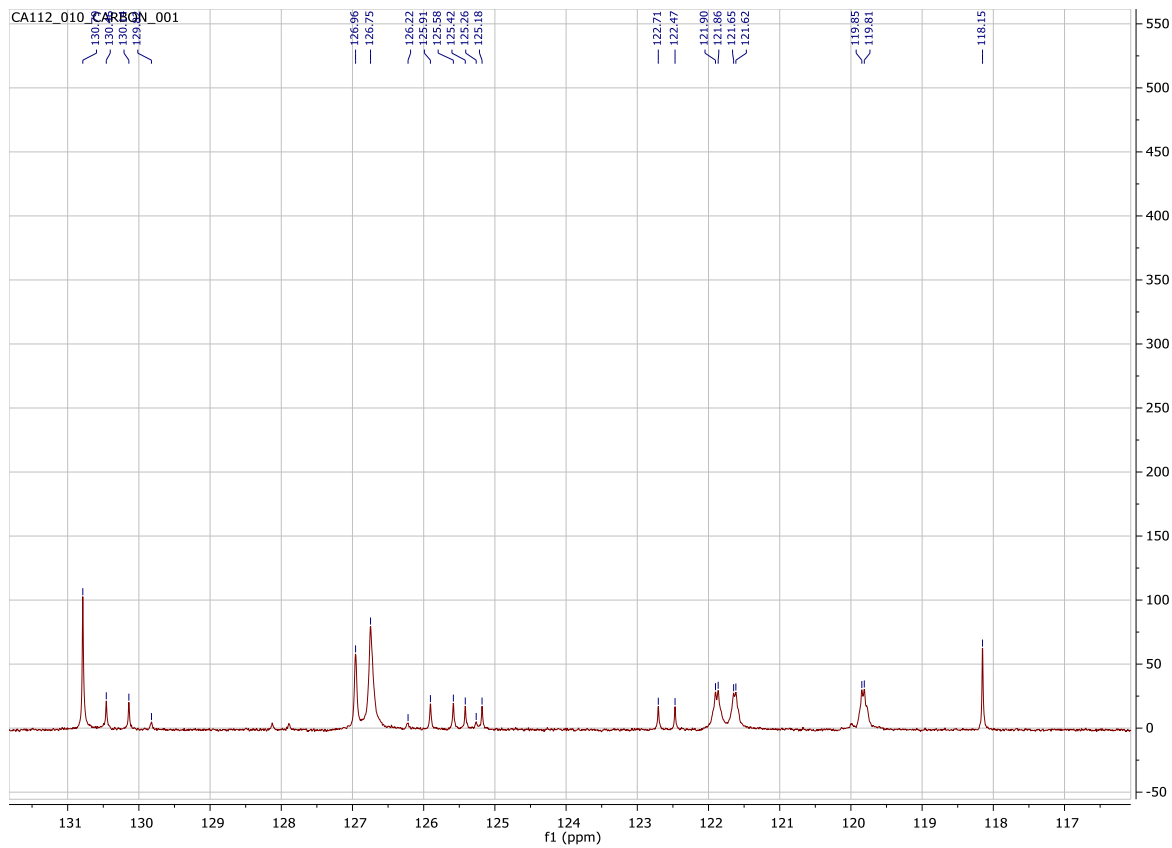

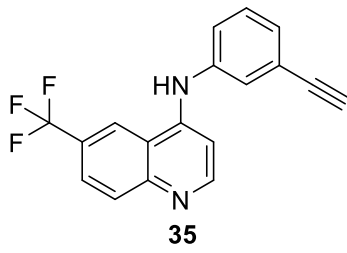

**N-(3-Ethynylphenyl)-6-(trifluoromethyl)quinolin-4-amine (35)**

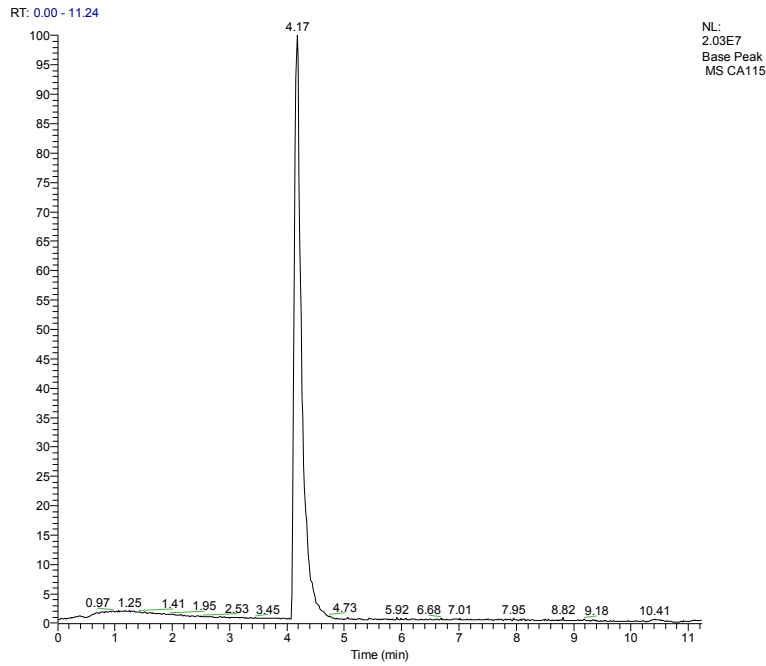

CA115 #248-285 RT: 3.94-4.51 AV: 38 NL: 5.21E6  
T: FTMS + p ESI Full ms [100.00-2000.00]

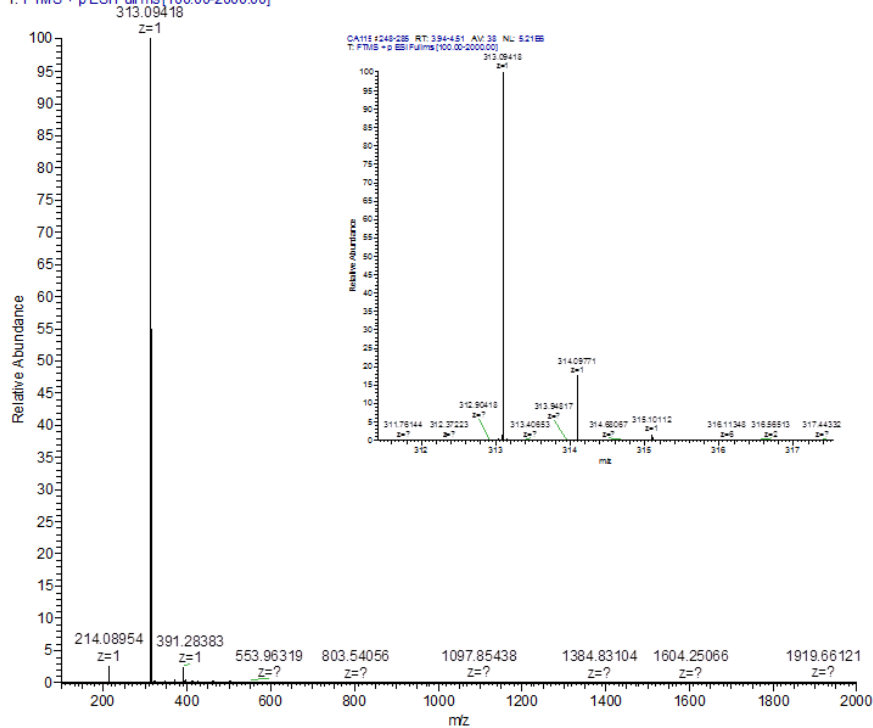

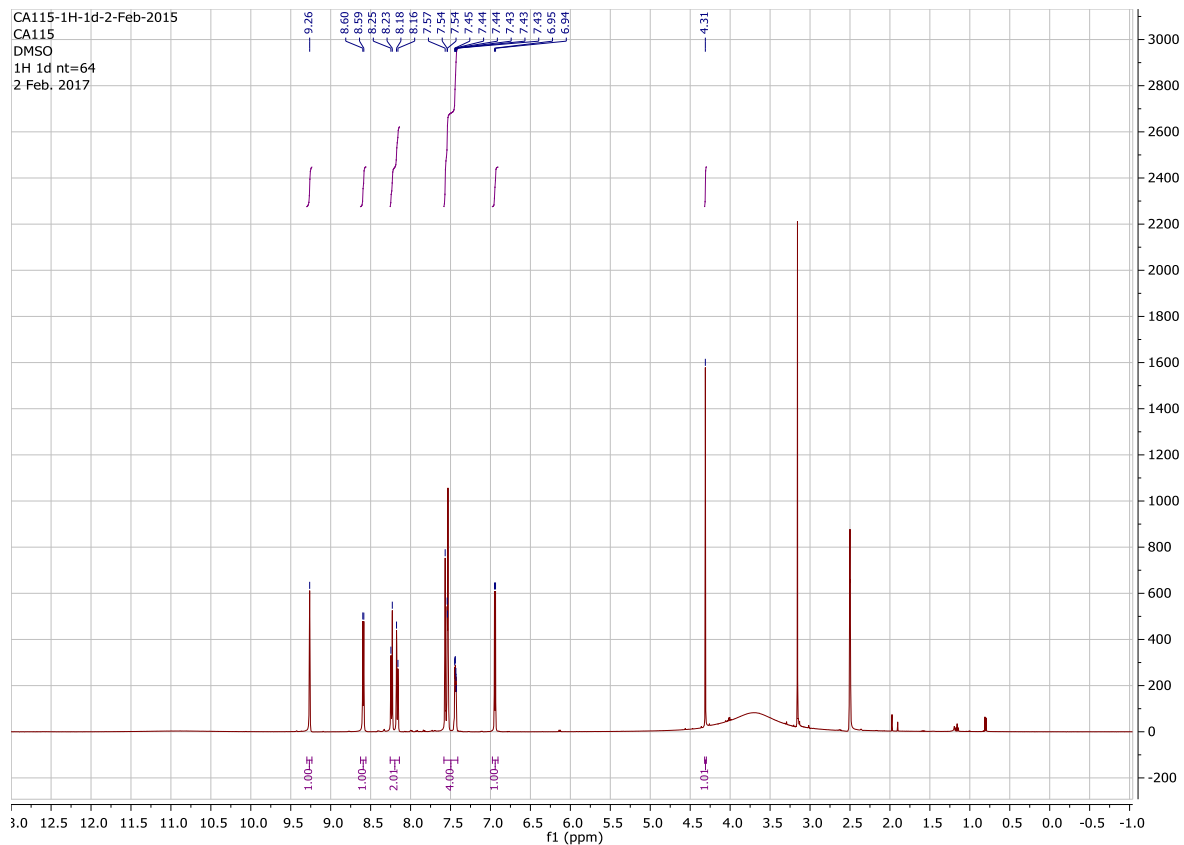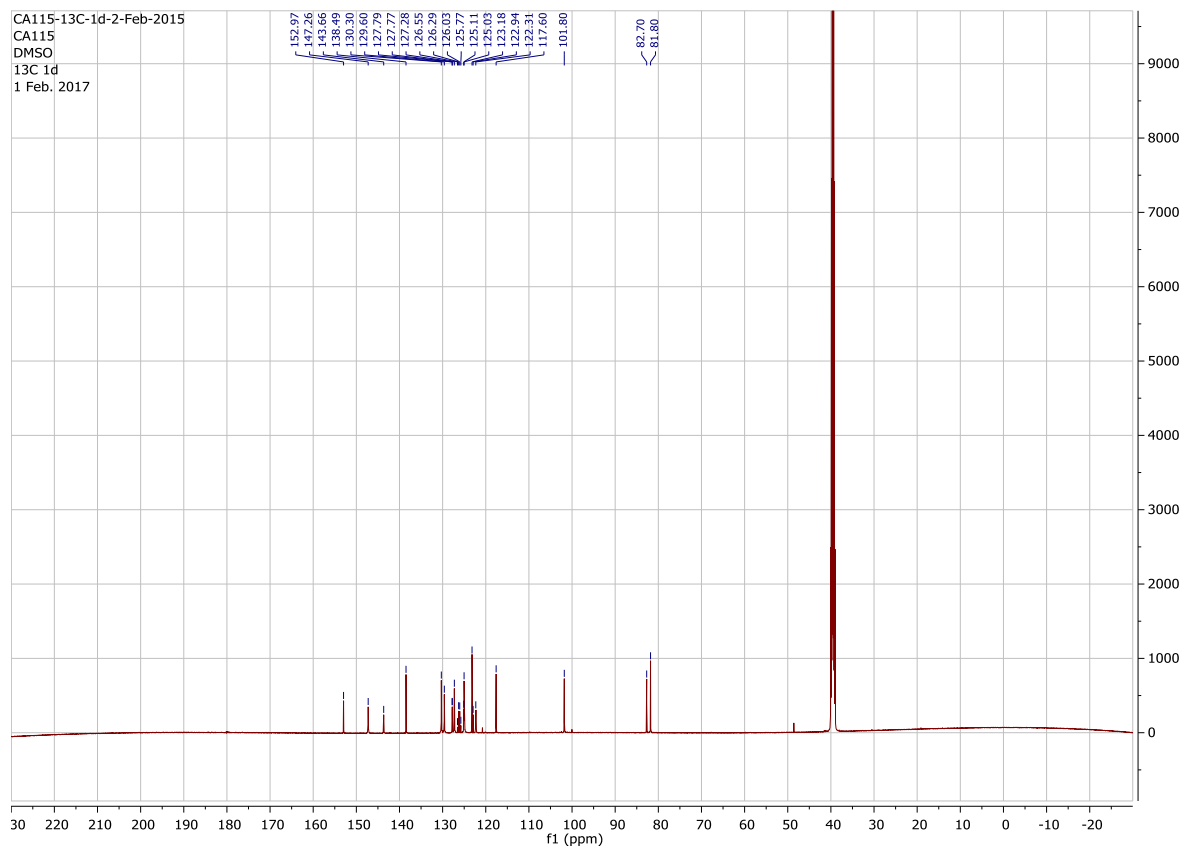

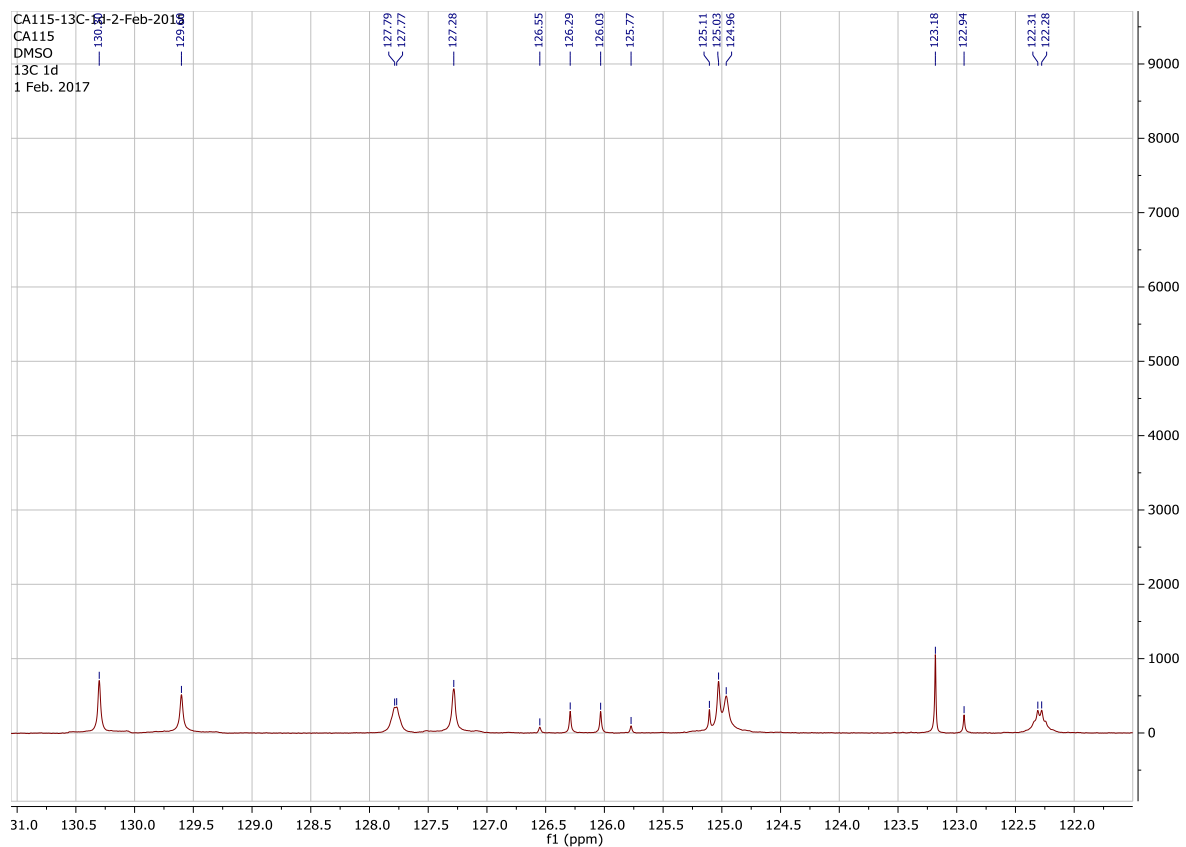

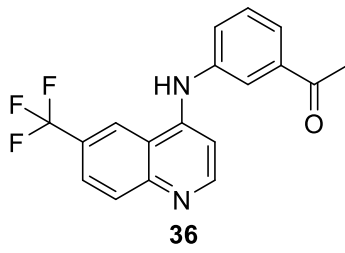

1-(3-((6-(Trifluoromethyl)quinolin-4-yl)amino)phenyl)ethan-1-one (**36**)

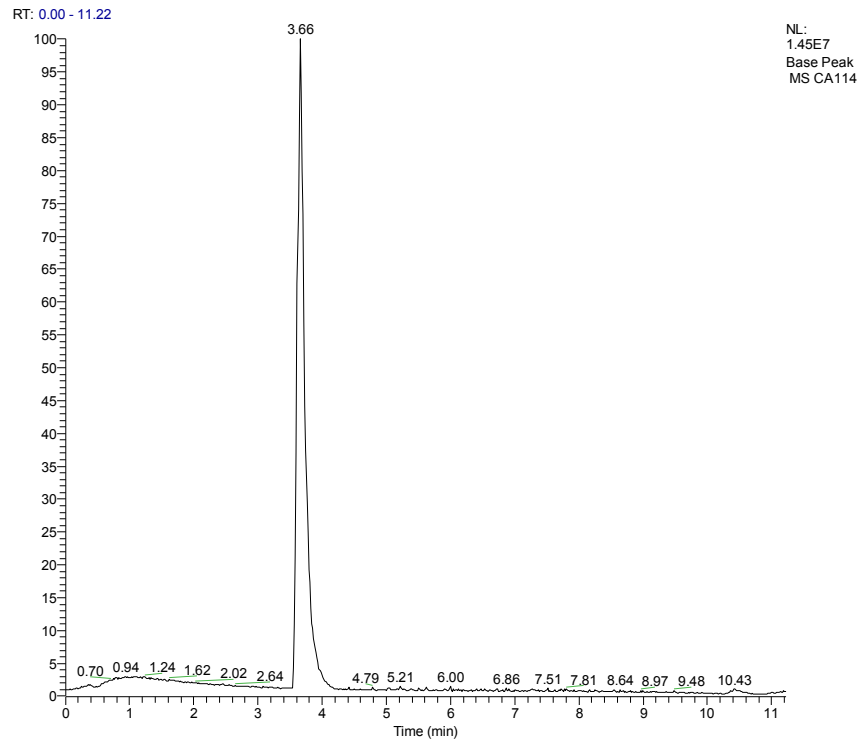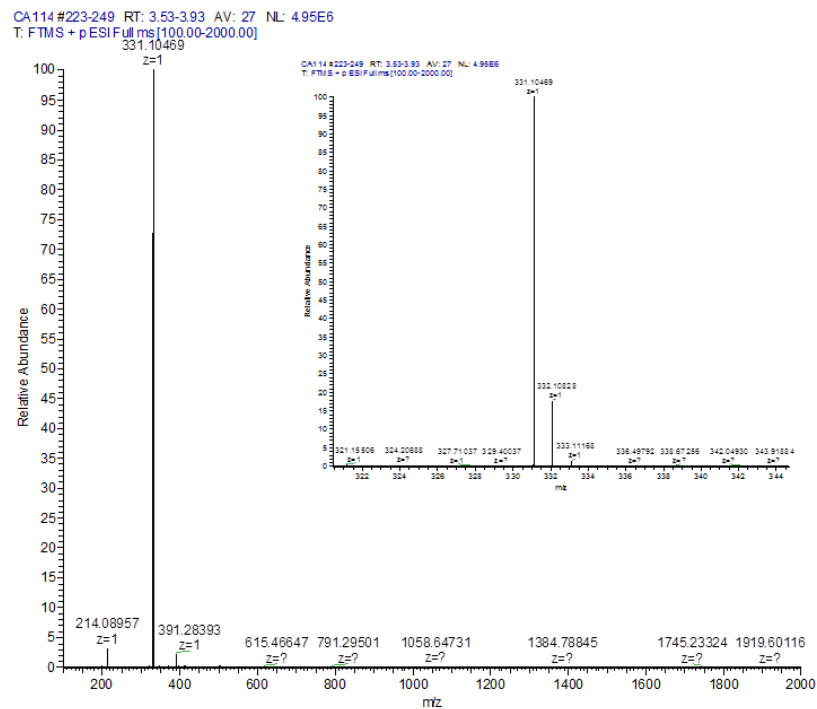

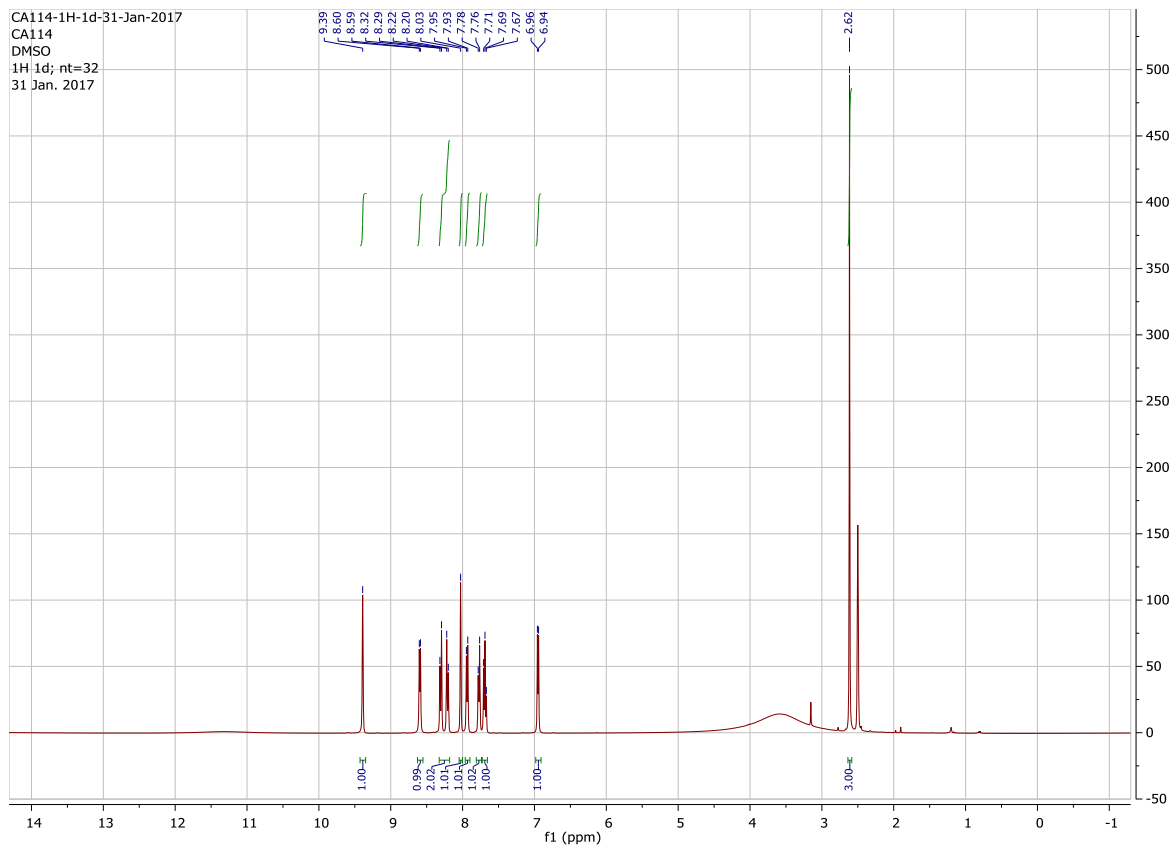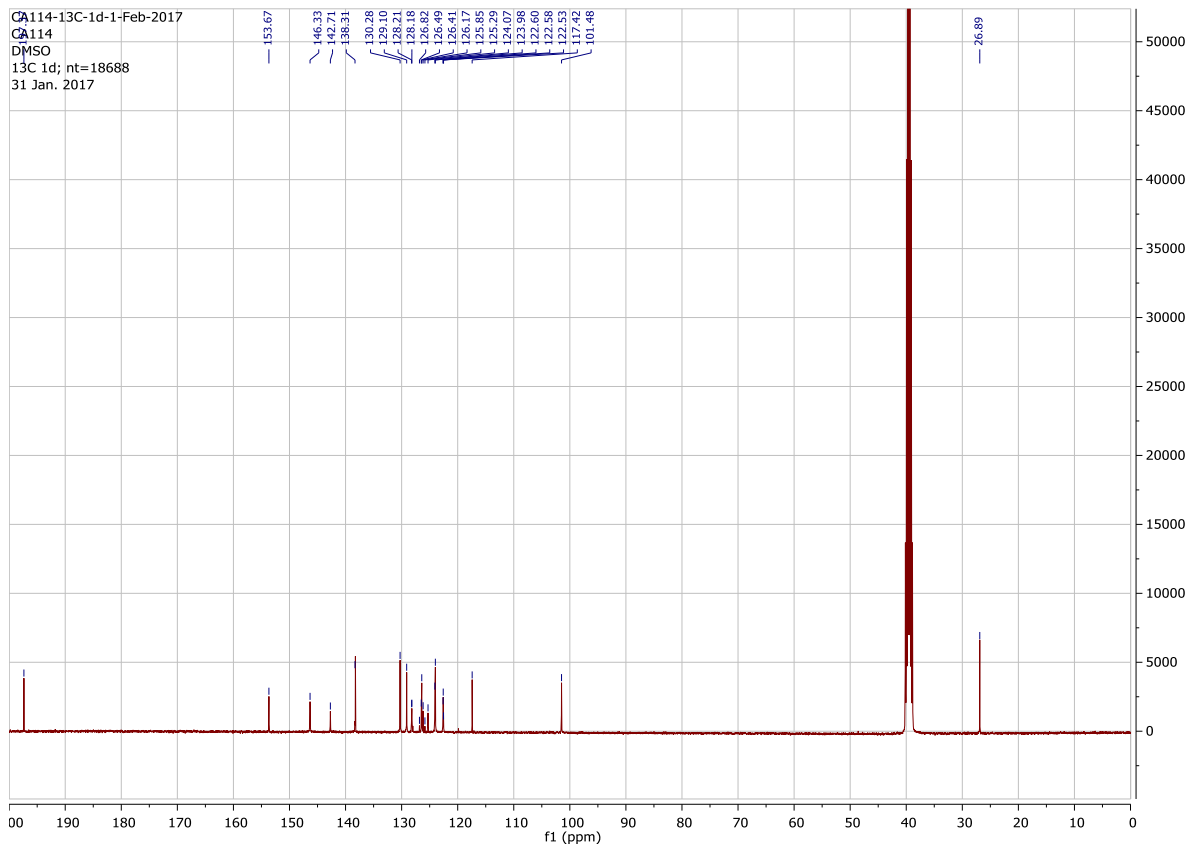

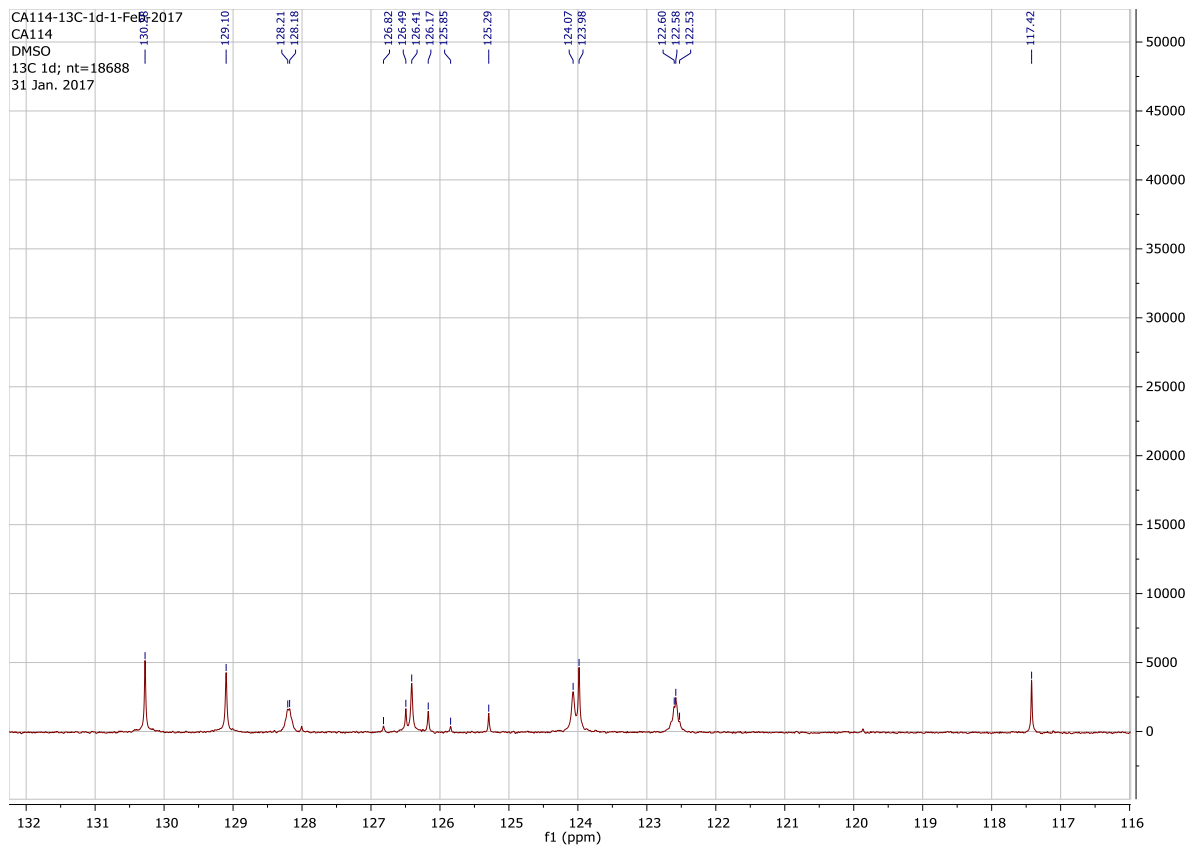

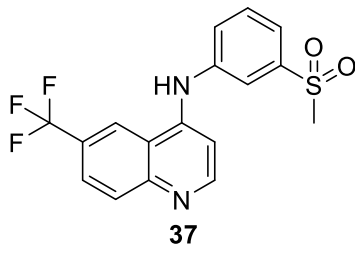

*N*-(3-(Methylsulfonyl)phenyl)-6-(trifluoromethyl)quinolin-4-amine (**37**)

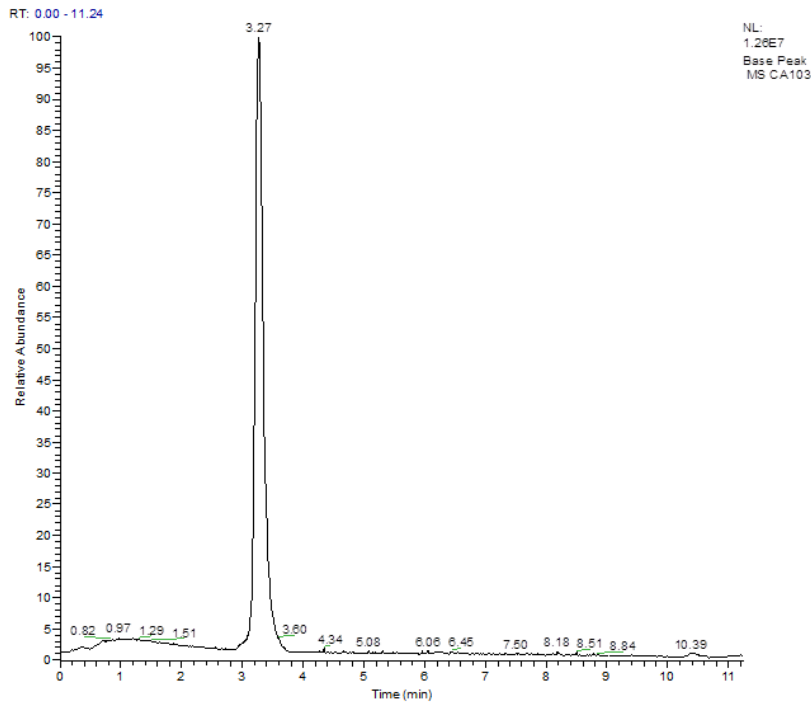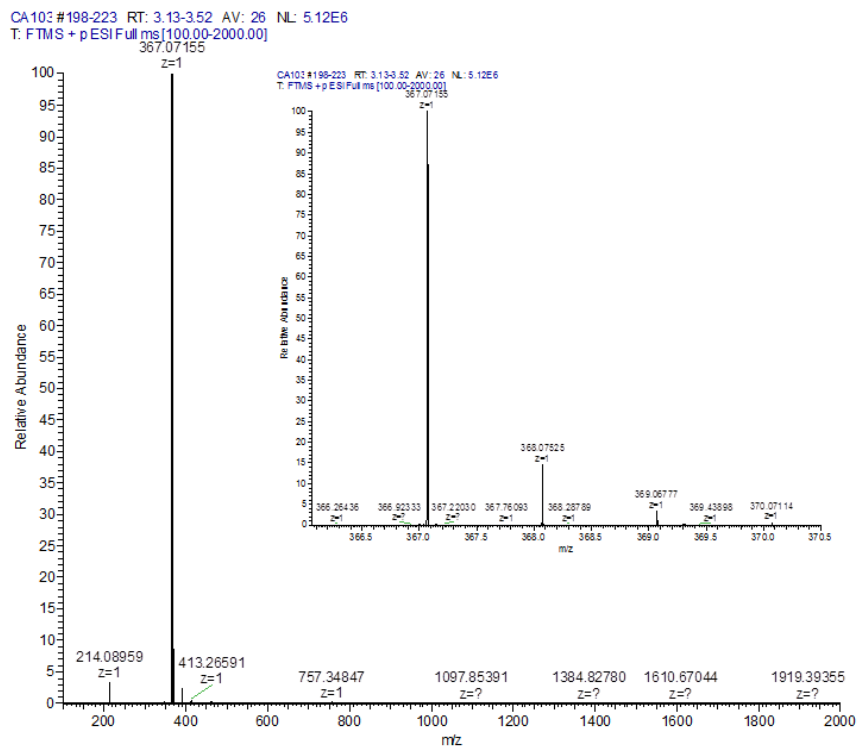



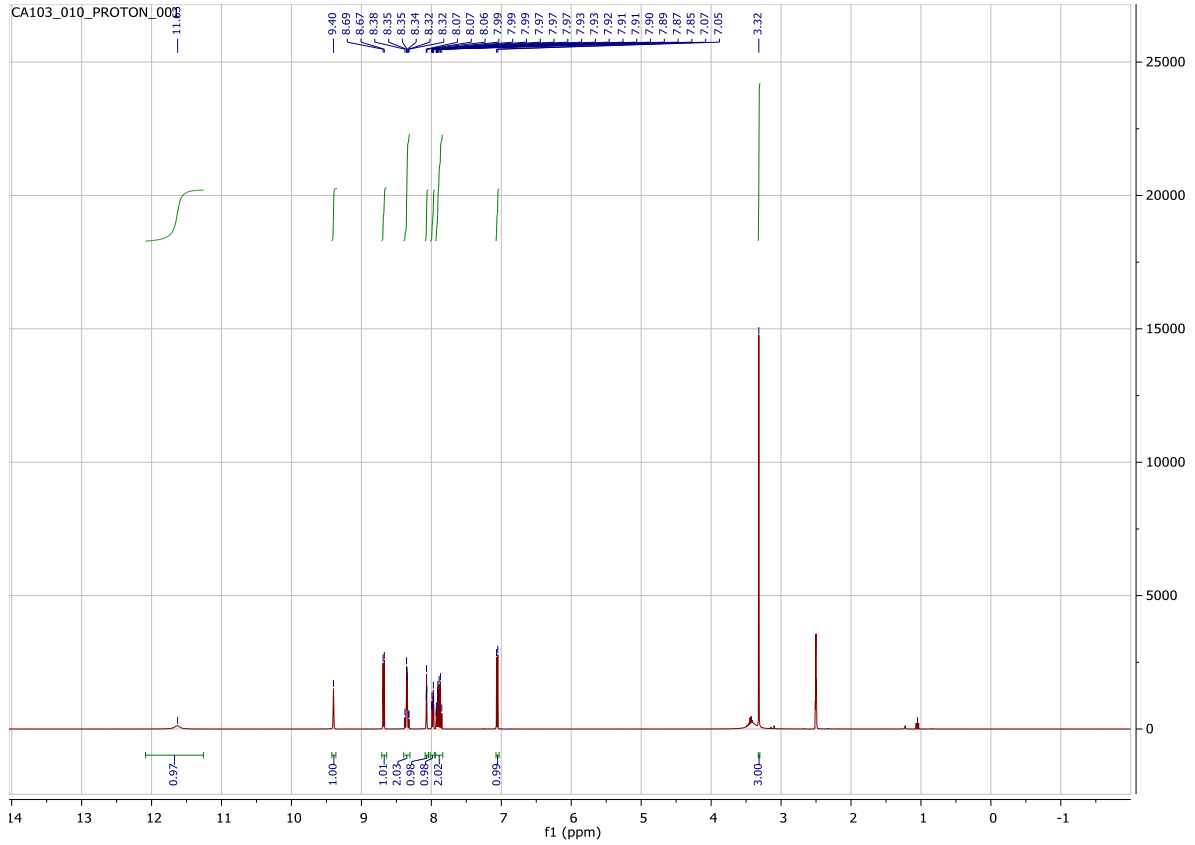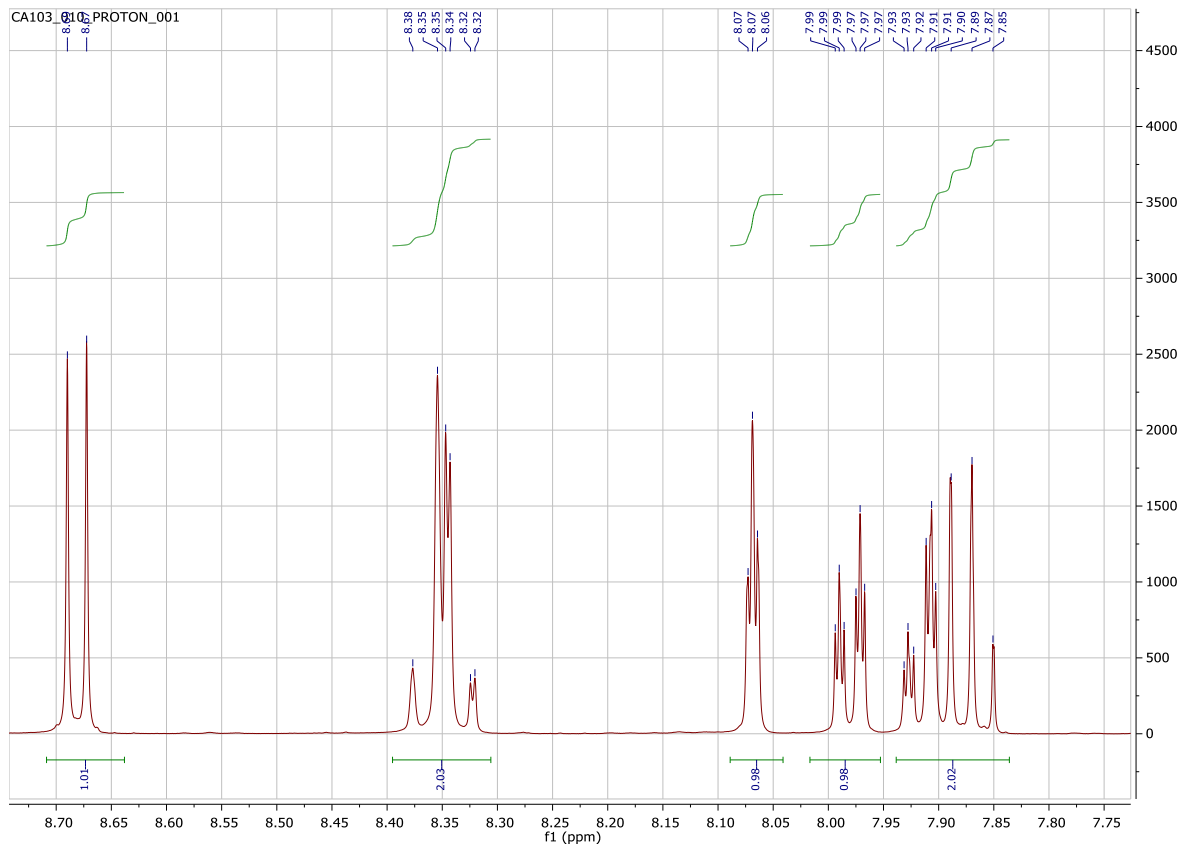

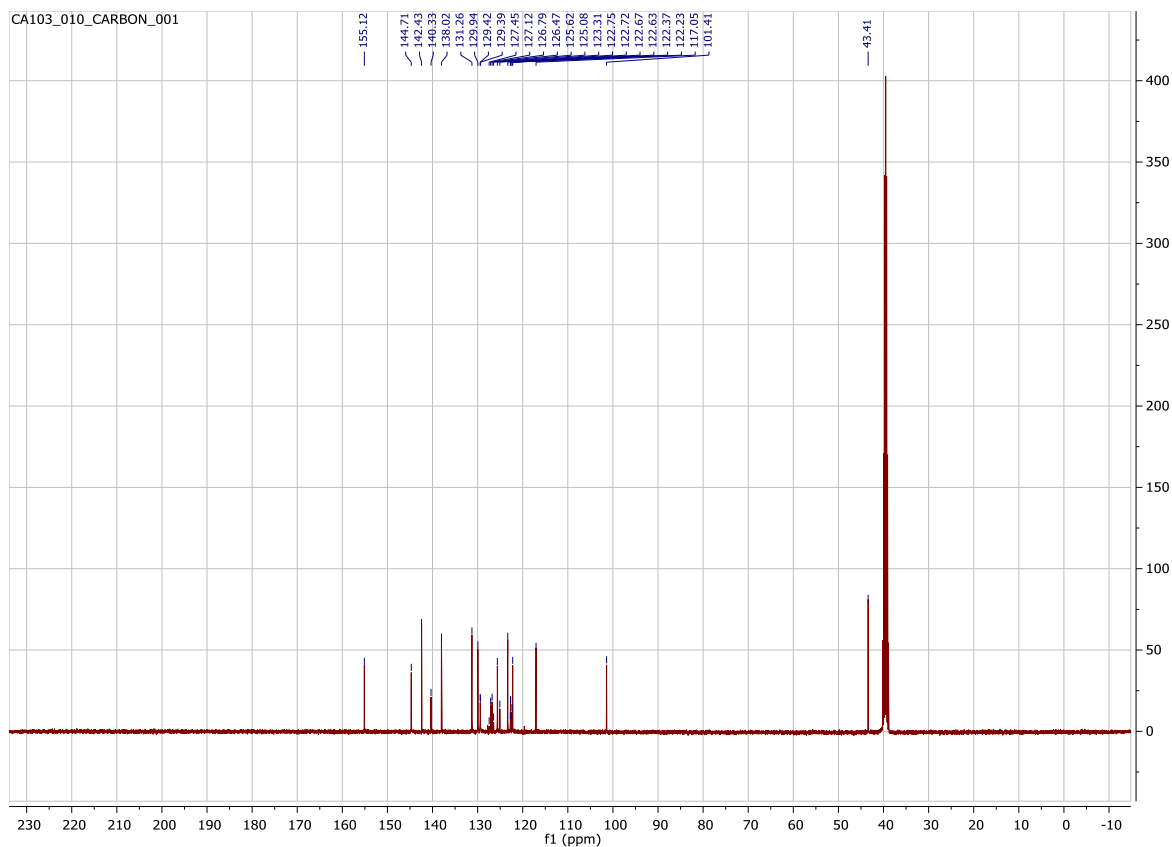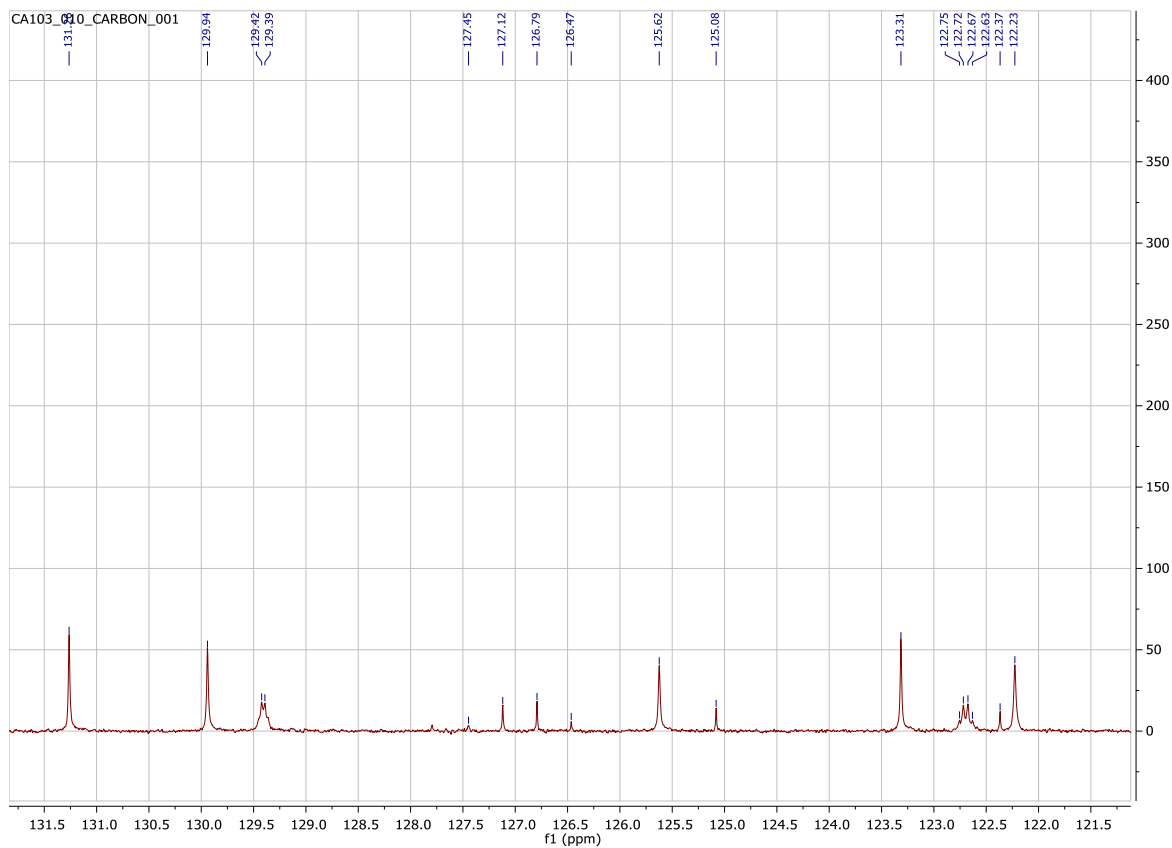

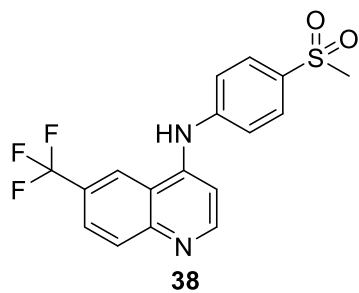

N-(4-(Methylsulfonyl)phenyl)-6-(trifluoromethyl)quinolin-4-amine (**38**)

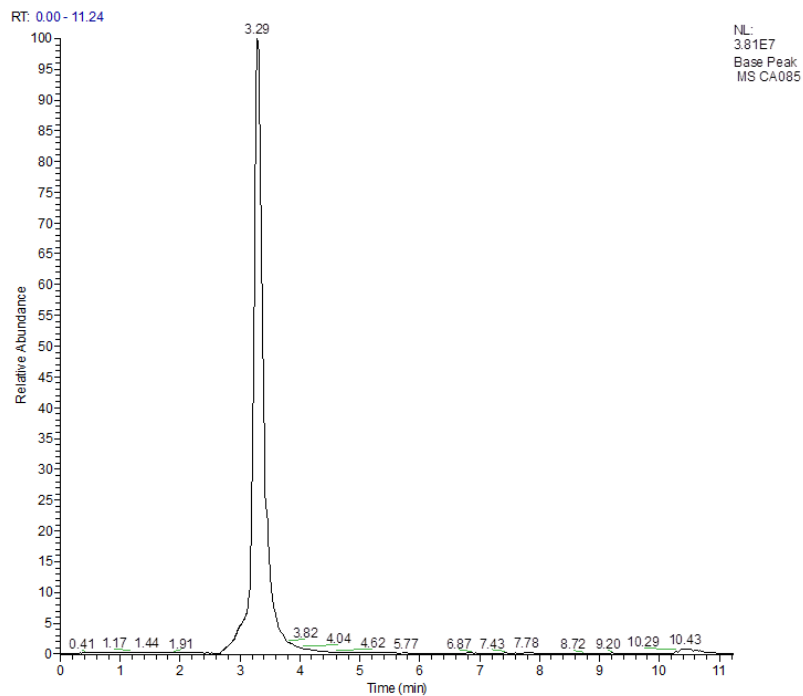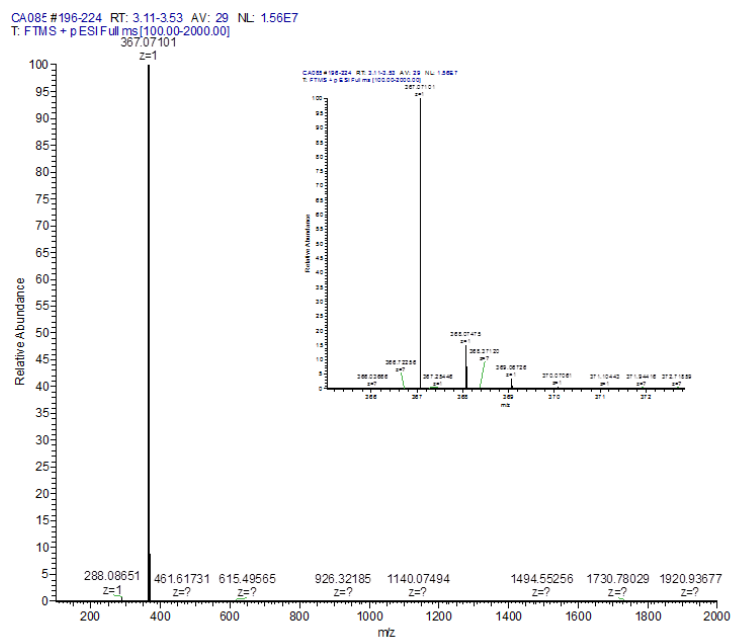

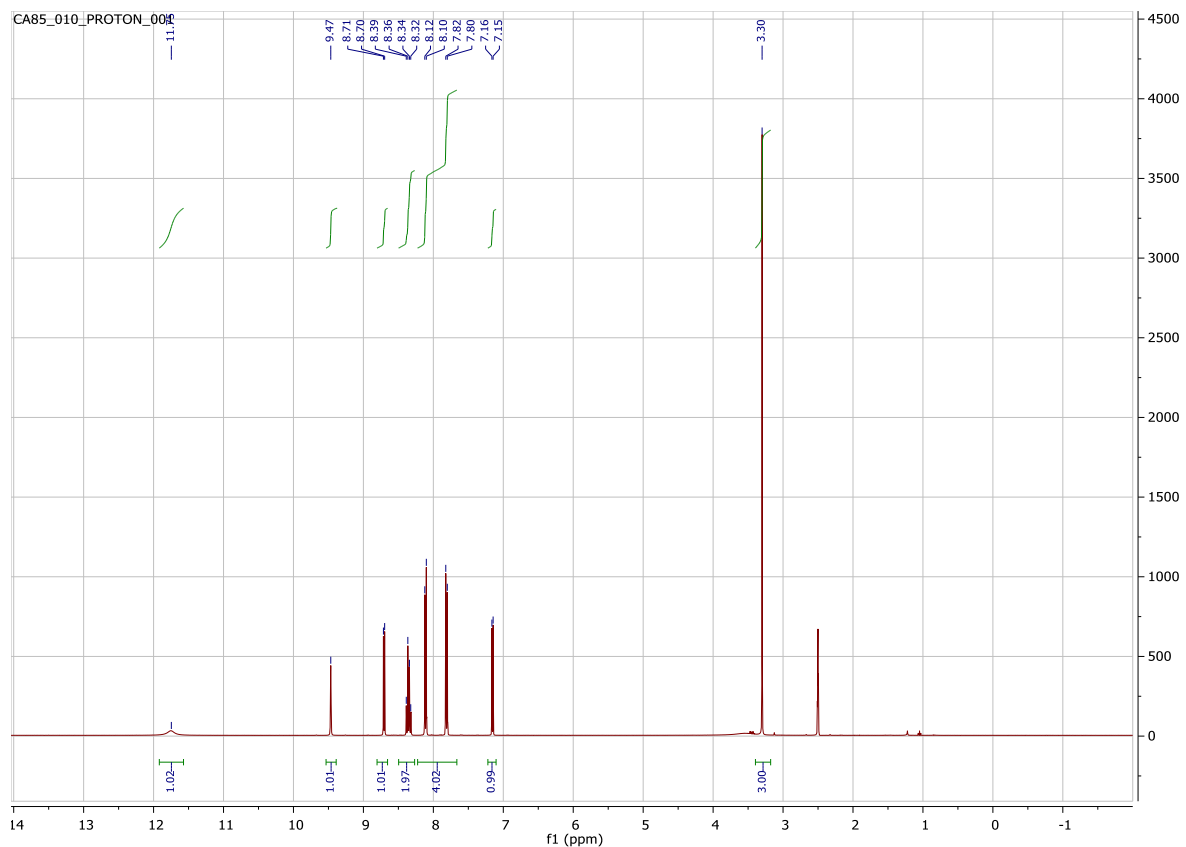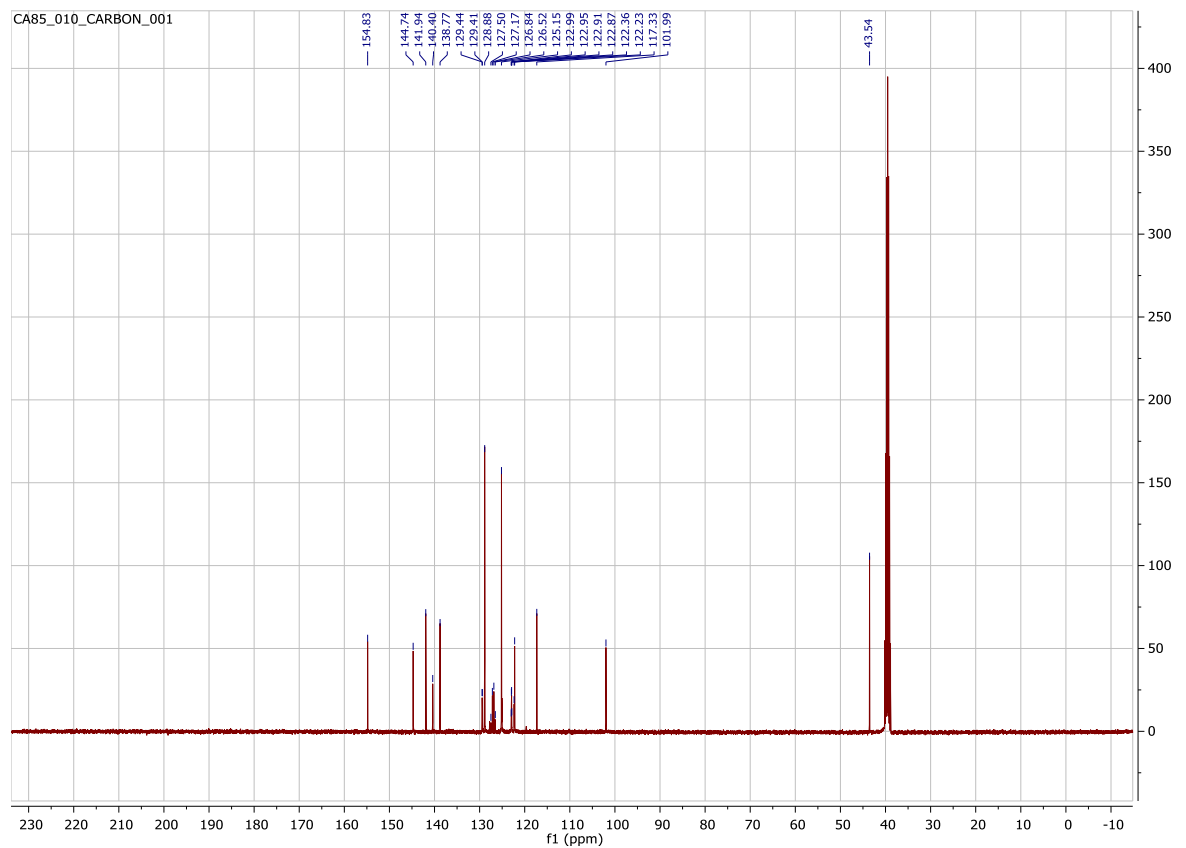

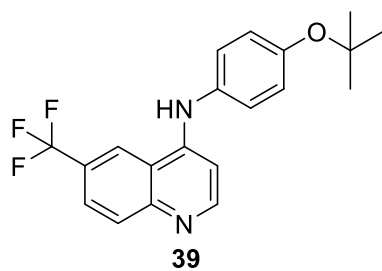

N-(4-(*tert*-Butoxy)phenyl)-6-(trifluoromethyl)quinolin-4-amine (**39**)

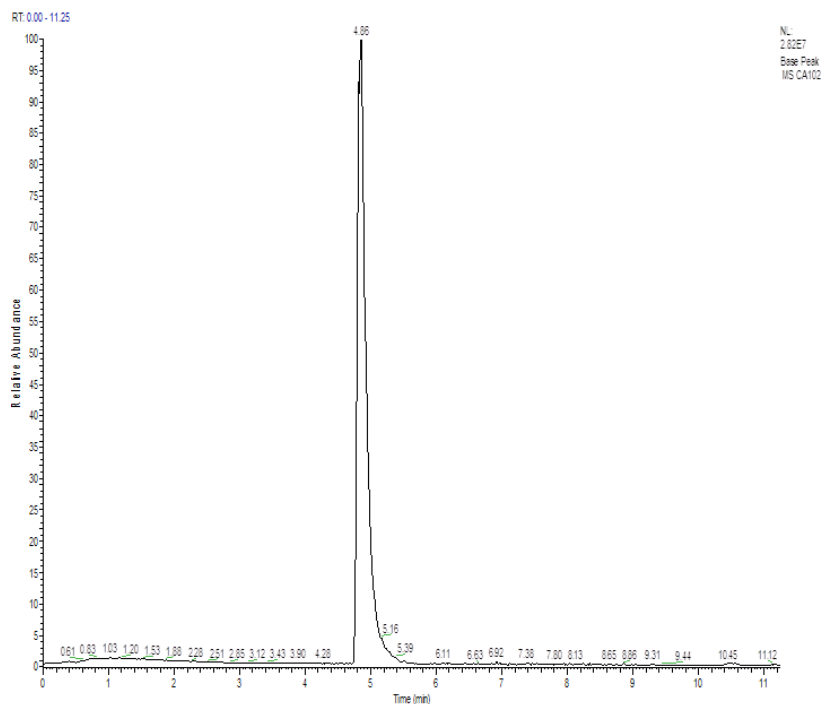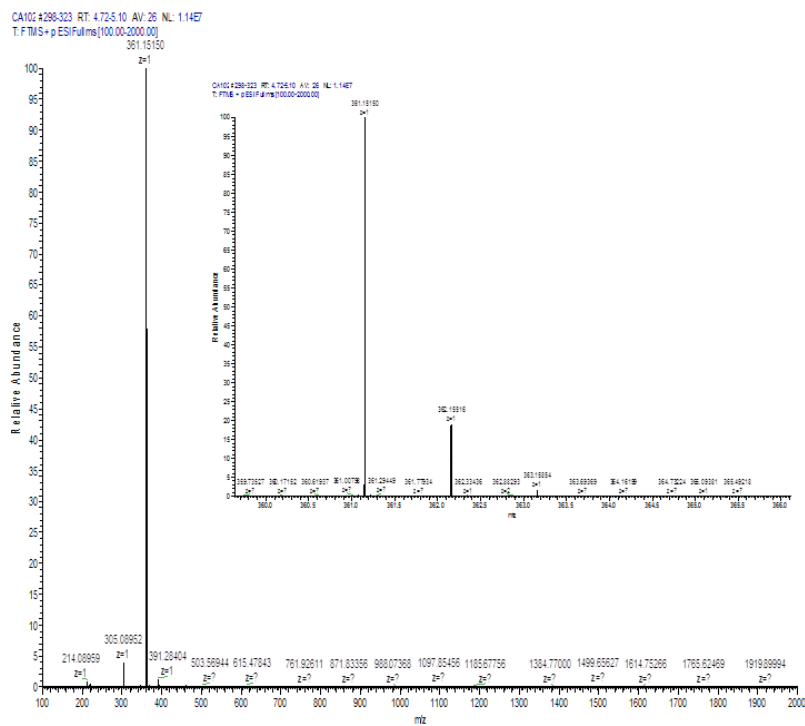

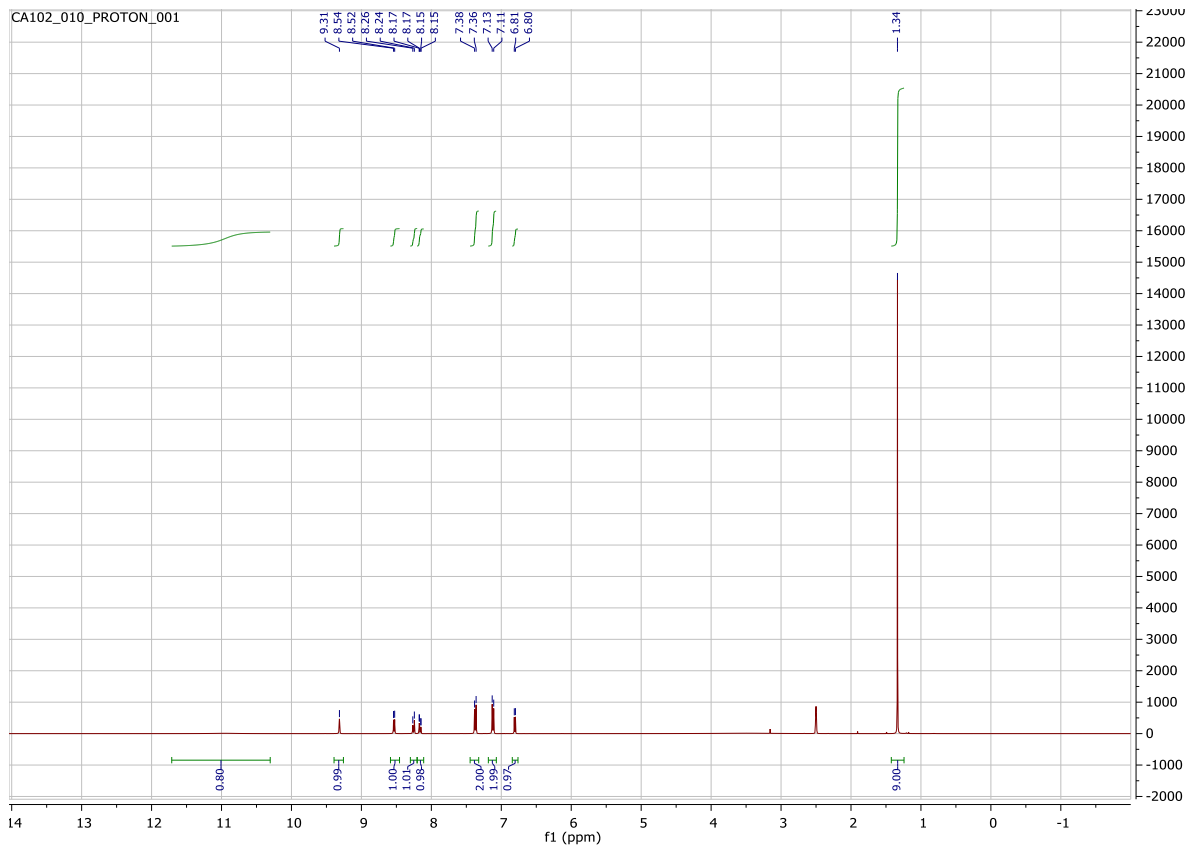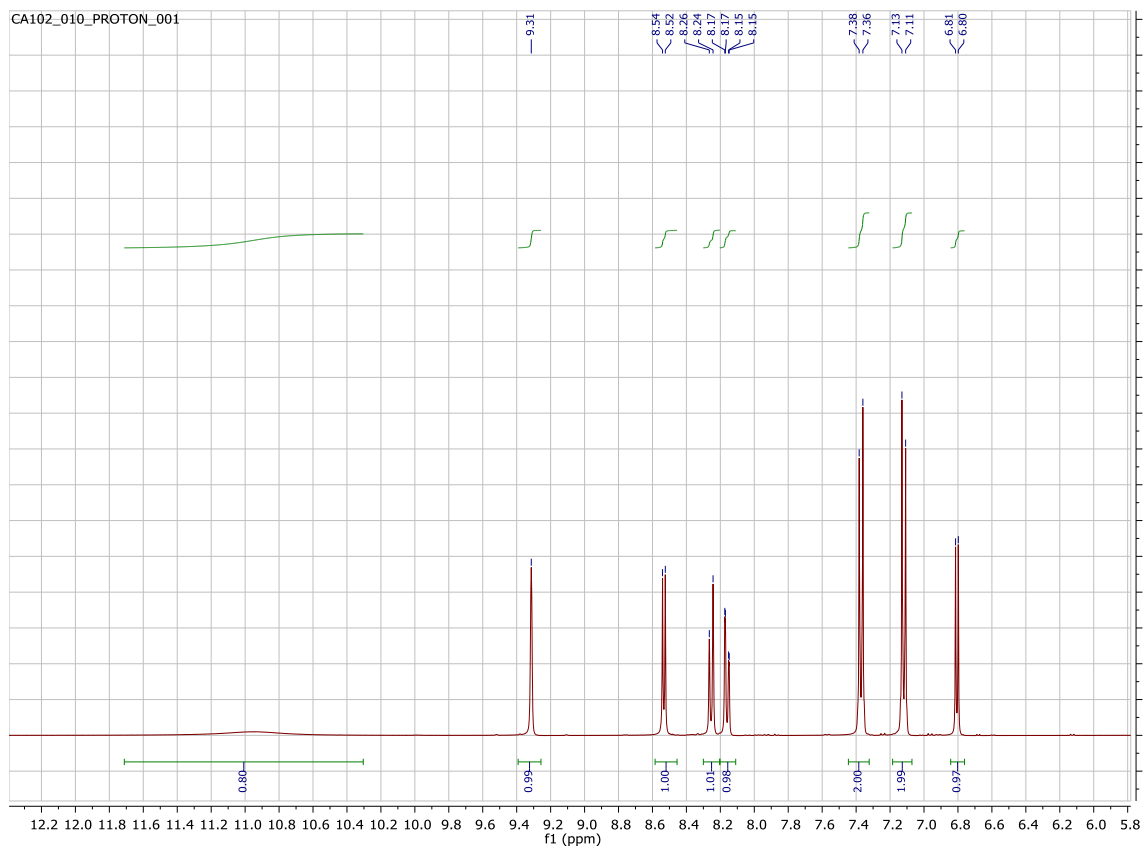

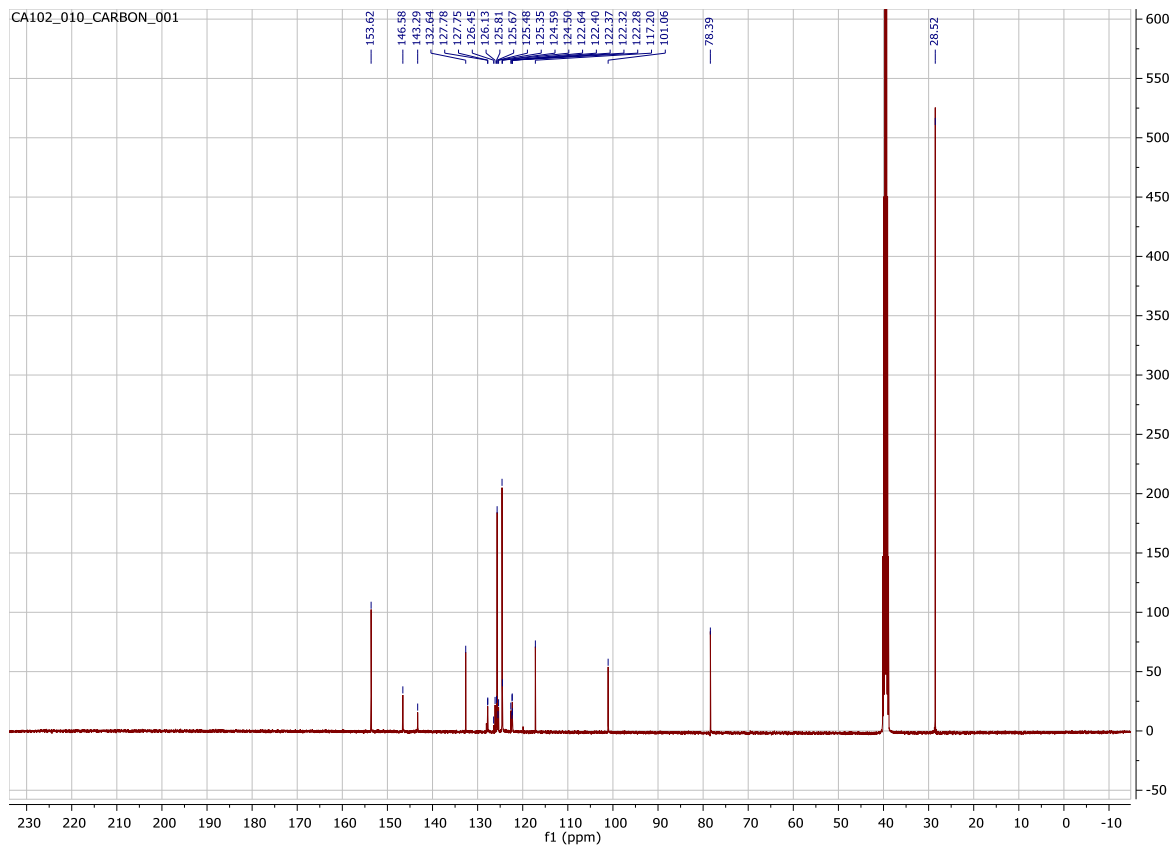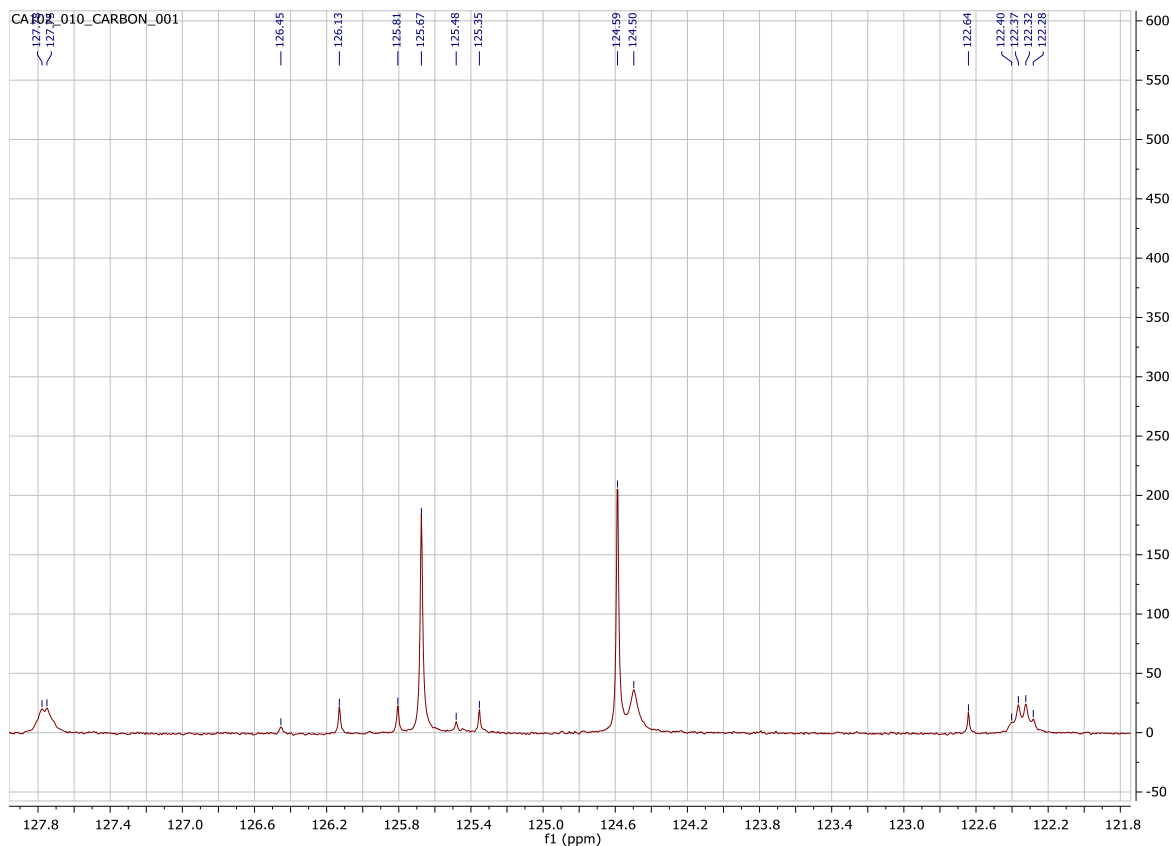

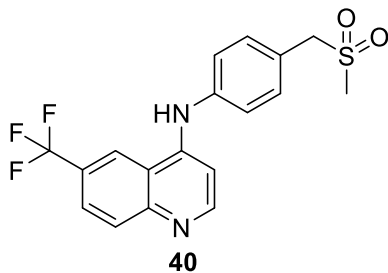

N-(4-((Methylsulfonyl)methyl)phenyl)-6-(trifluoromethyl)quinolin-4-amine (**40**)

RT: 0.00 - 11.24

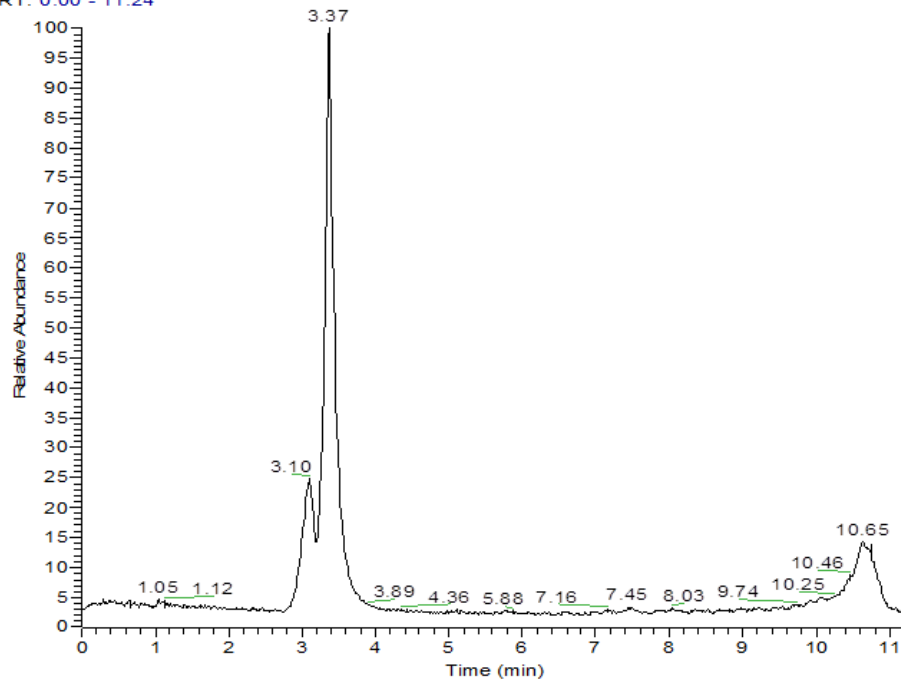

CA070 #204-226 RT: 3.19-3.52 AV: 23 NL: 9.32E6

T: FTMS + p ESI Full ms [100.00-2000.00]

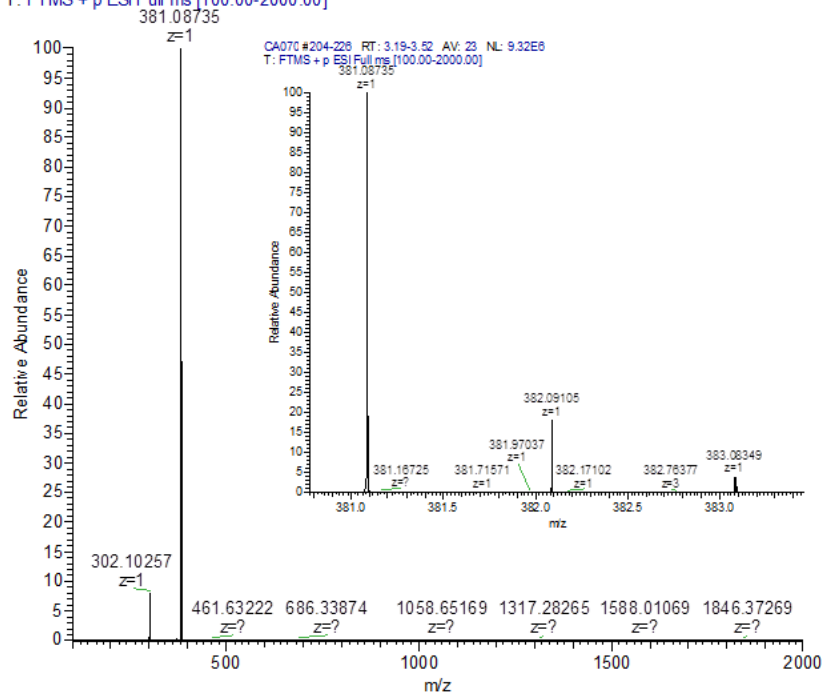



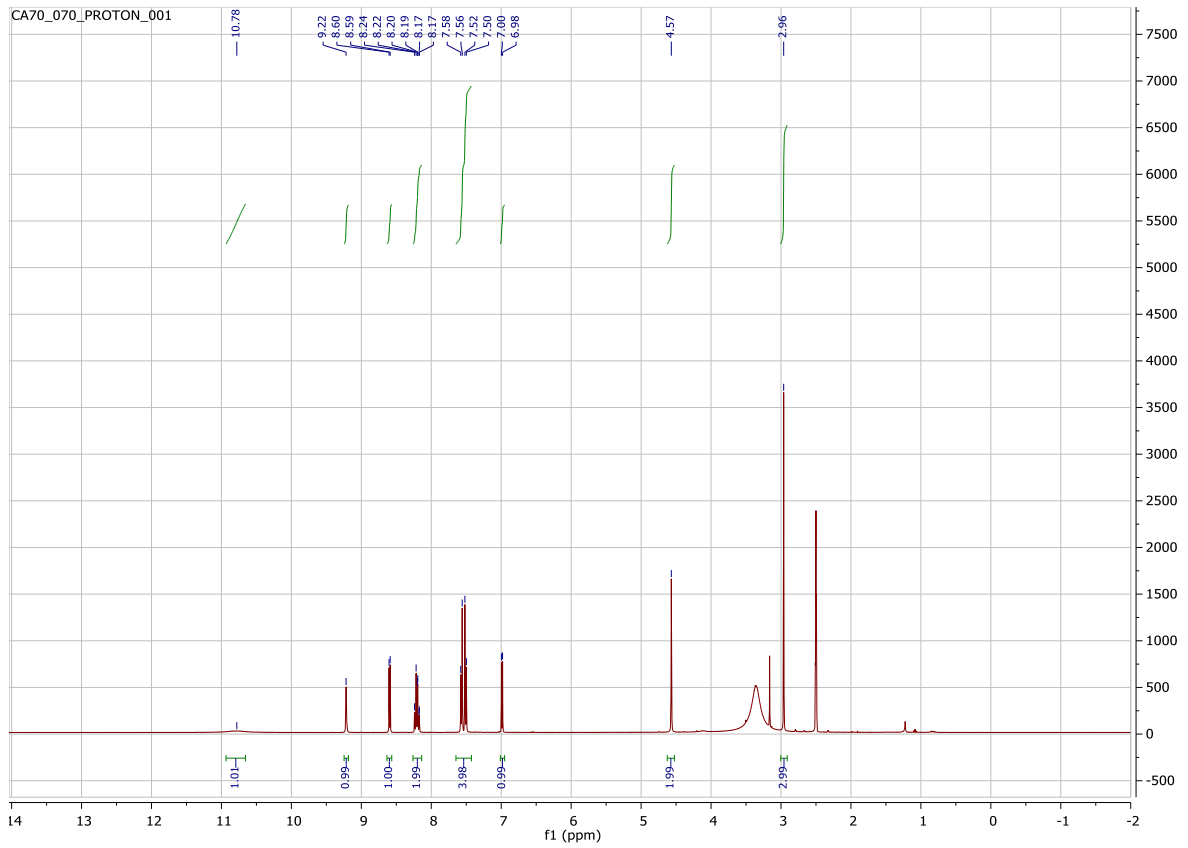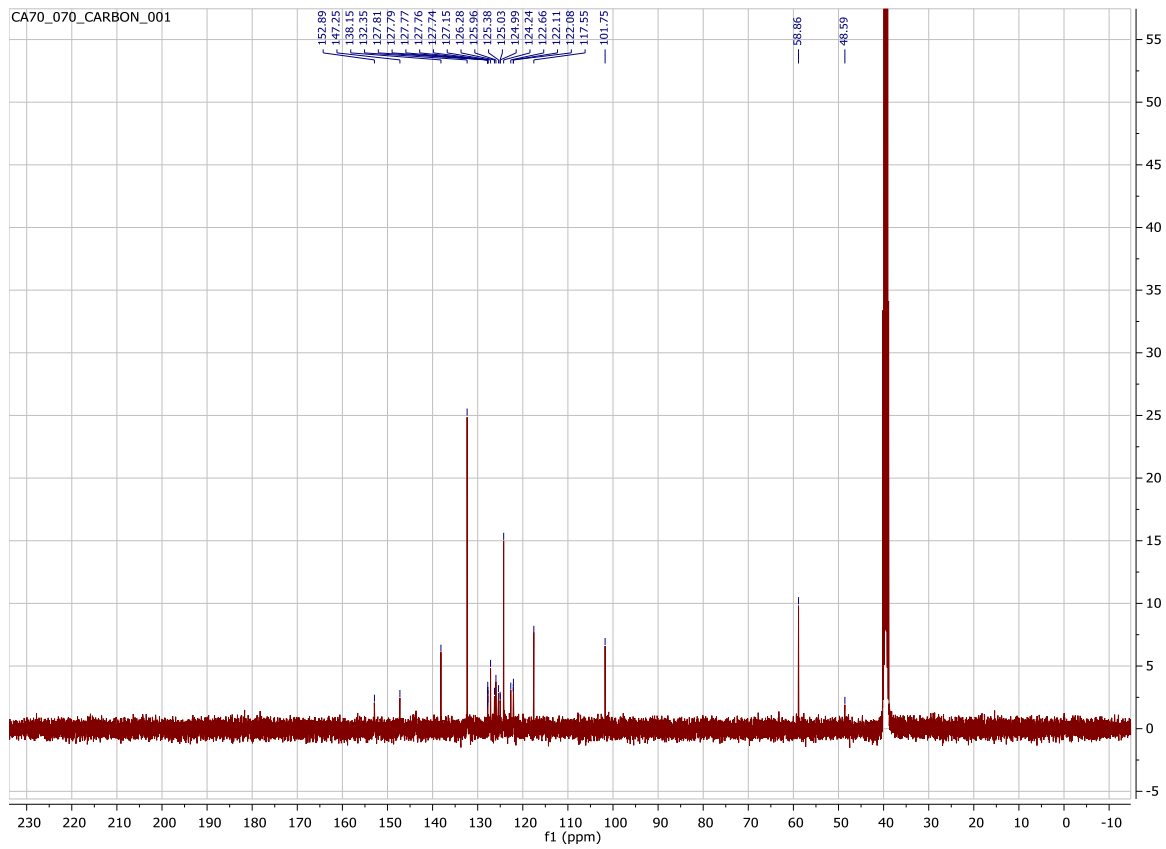

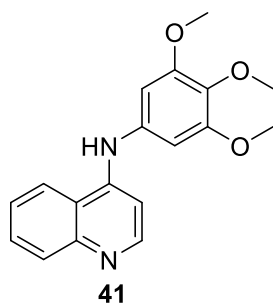

N-(3,4,5-Trimethoxyphenyl)quinolin-4-amine (**41**)

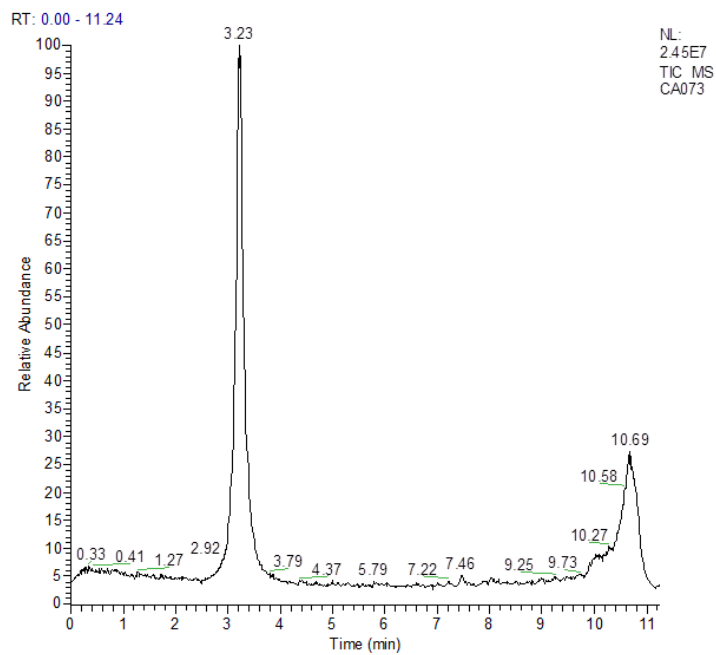

CA073 #192-217 RT: 3.02-3.40 AV: 26 NL: 6.00E6  
T: FTMS + p ESI Full ms [100.00-2000.00]

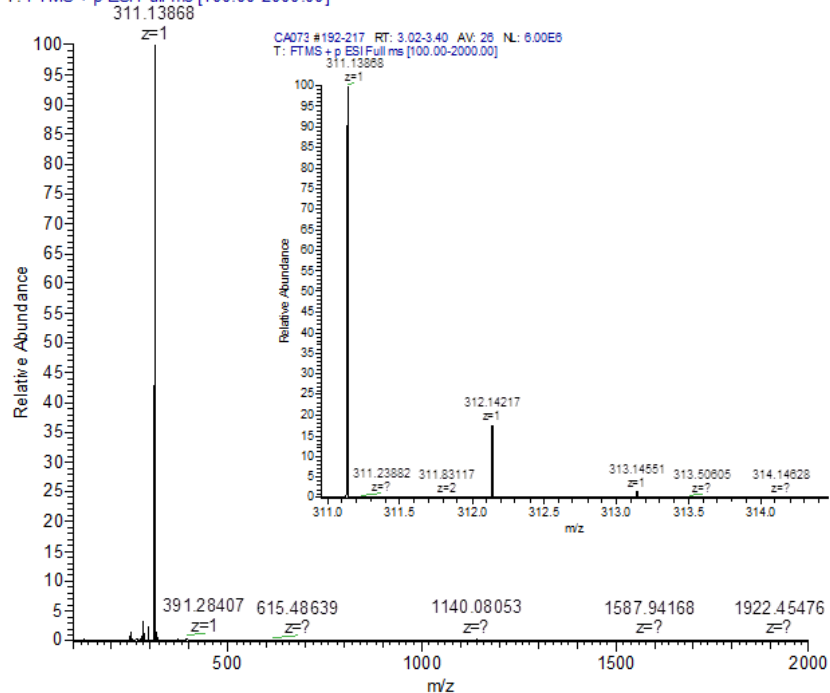

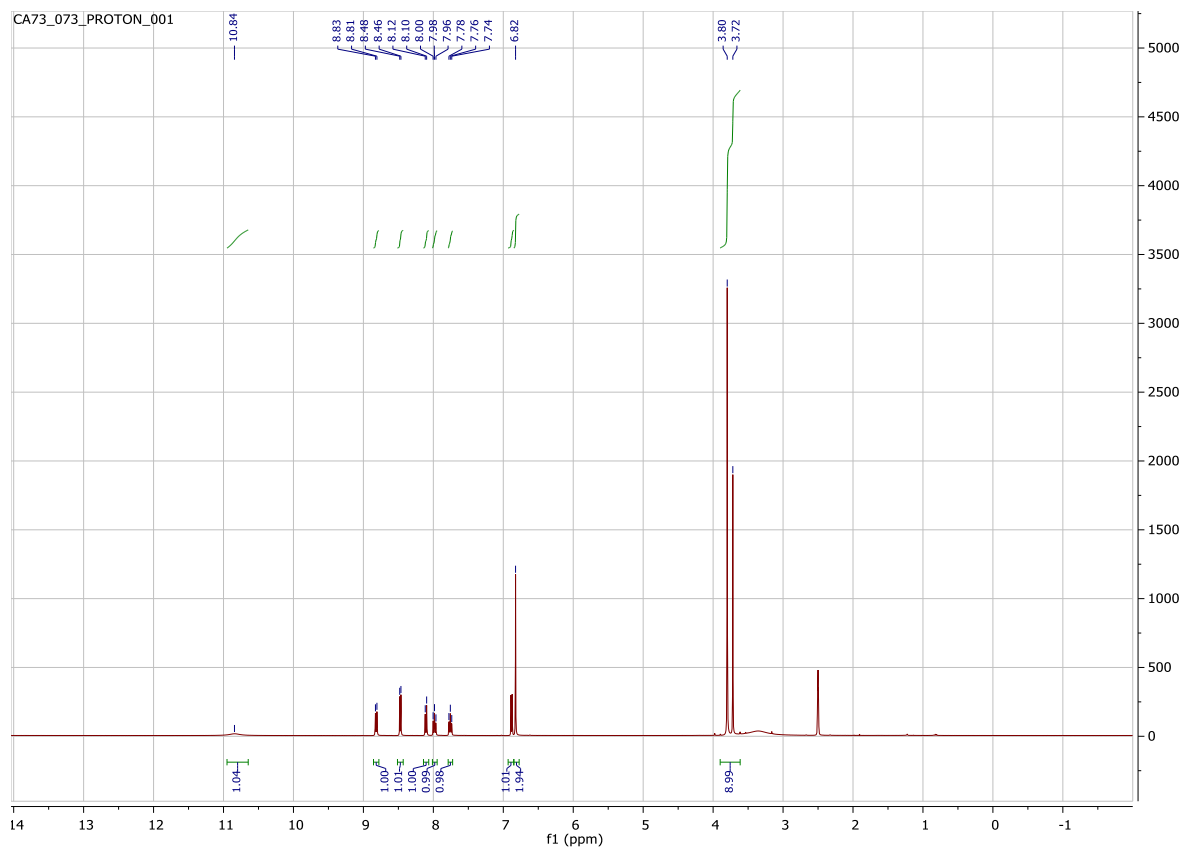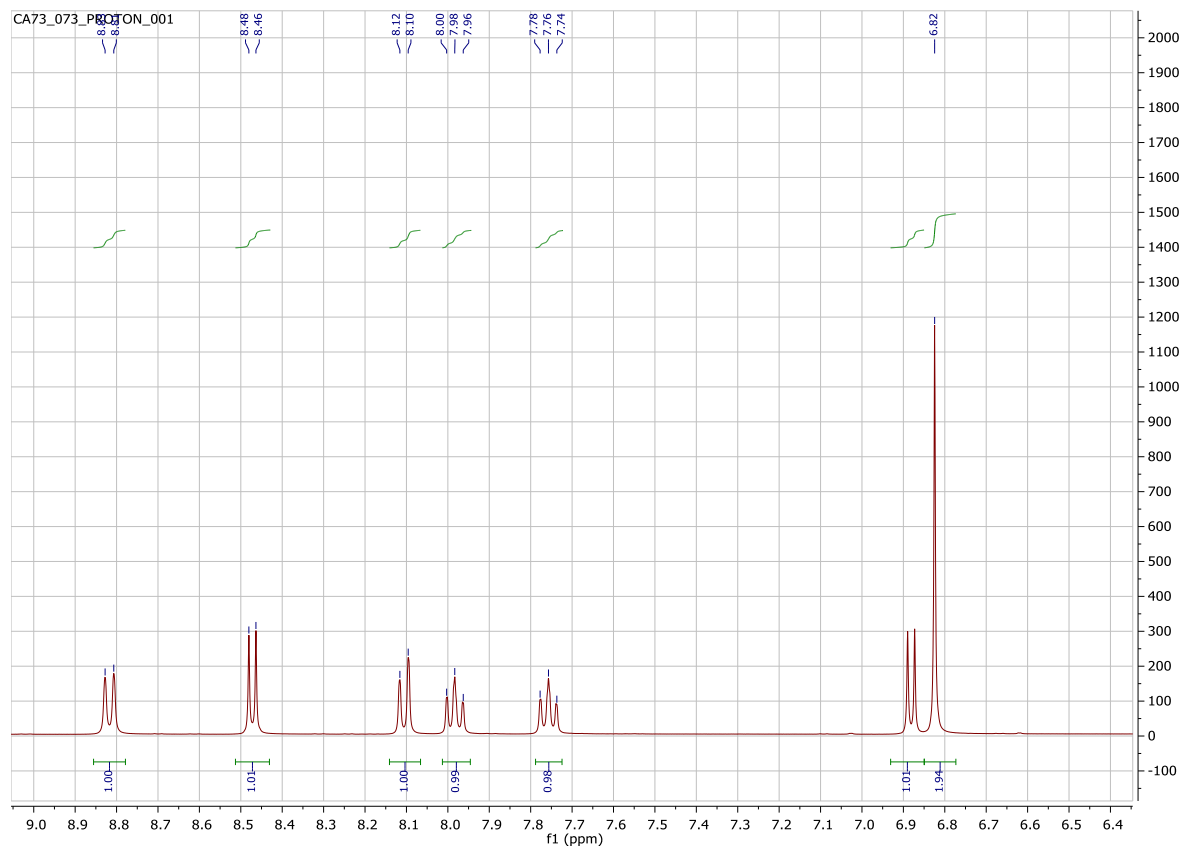

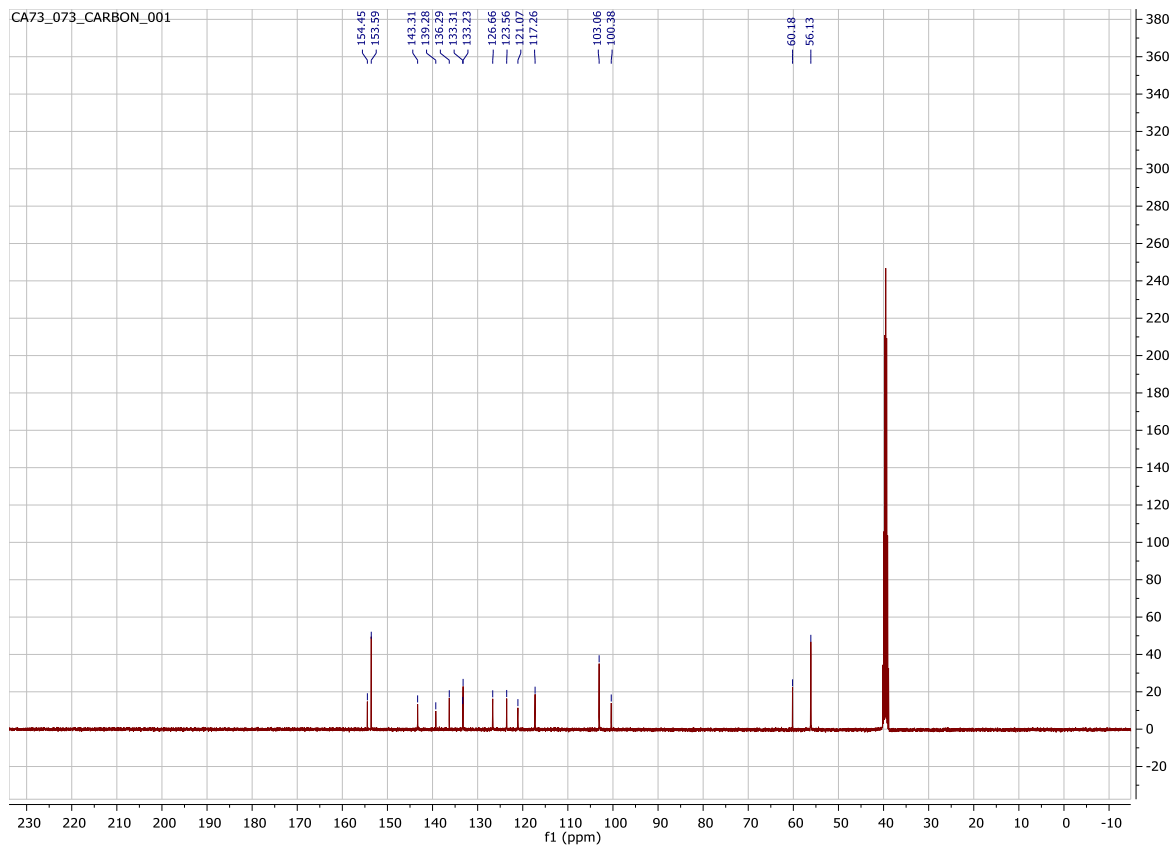

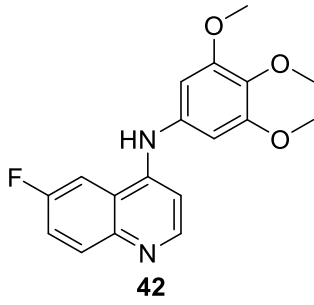

6-Fluoro-*N*-(3,4,5-trimethoxyphenyl)quinolin-4-amine (**42**)

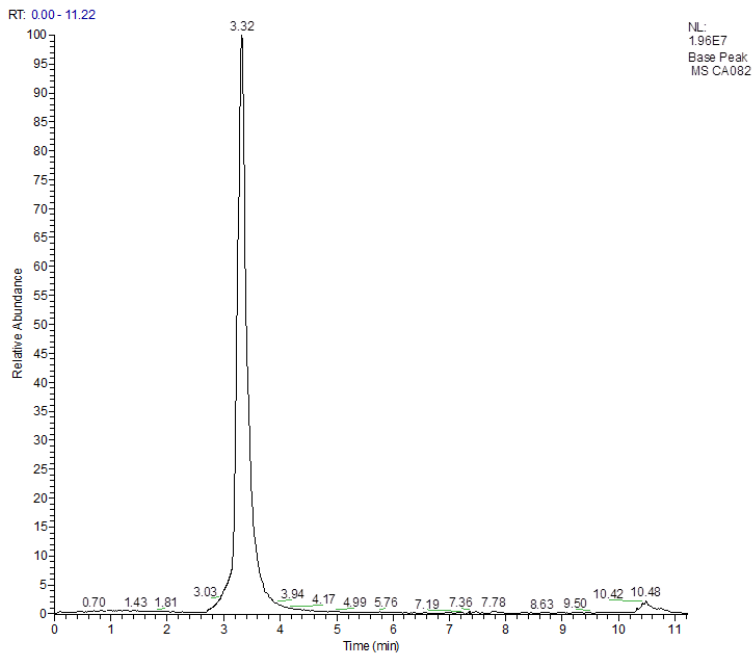

082216\_AG\_CA82\_CA\_Timwilson #1-100 RT: 0.01-1.48 AV: 100 NL: 3.17E6  
T: FTMS + p ESI Full ms [150.00-2000.00]

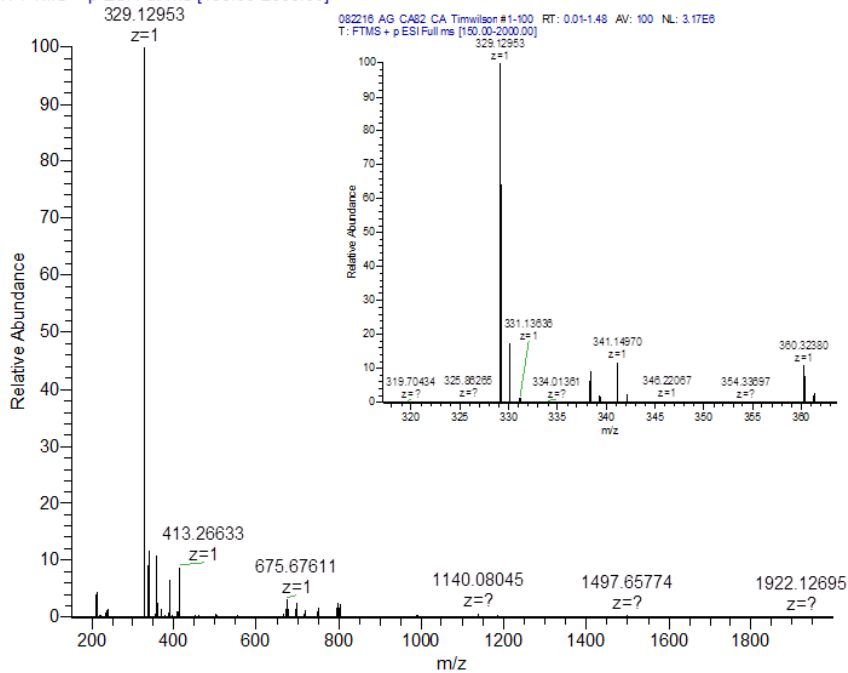

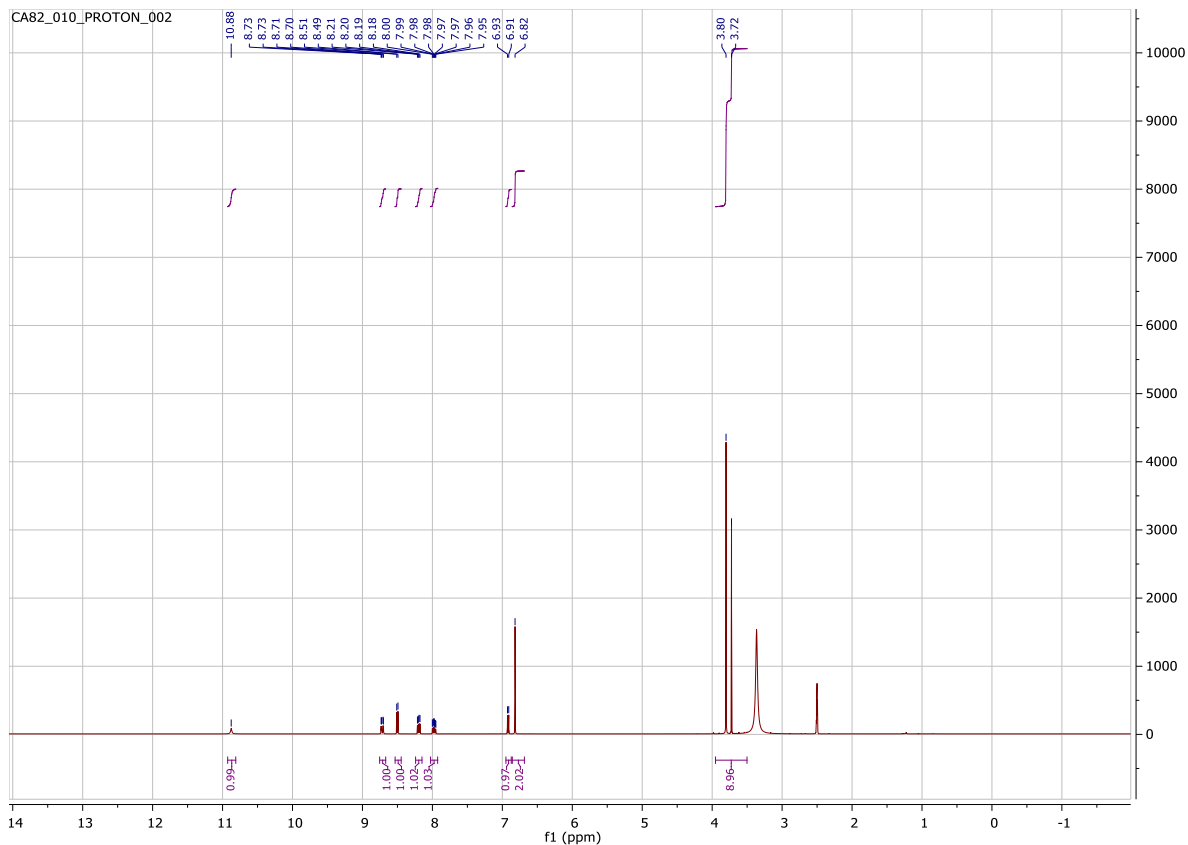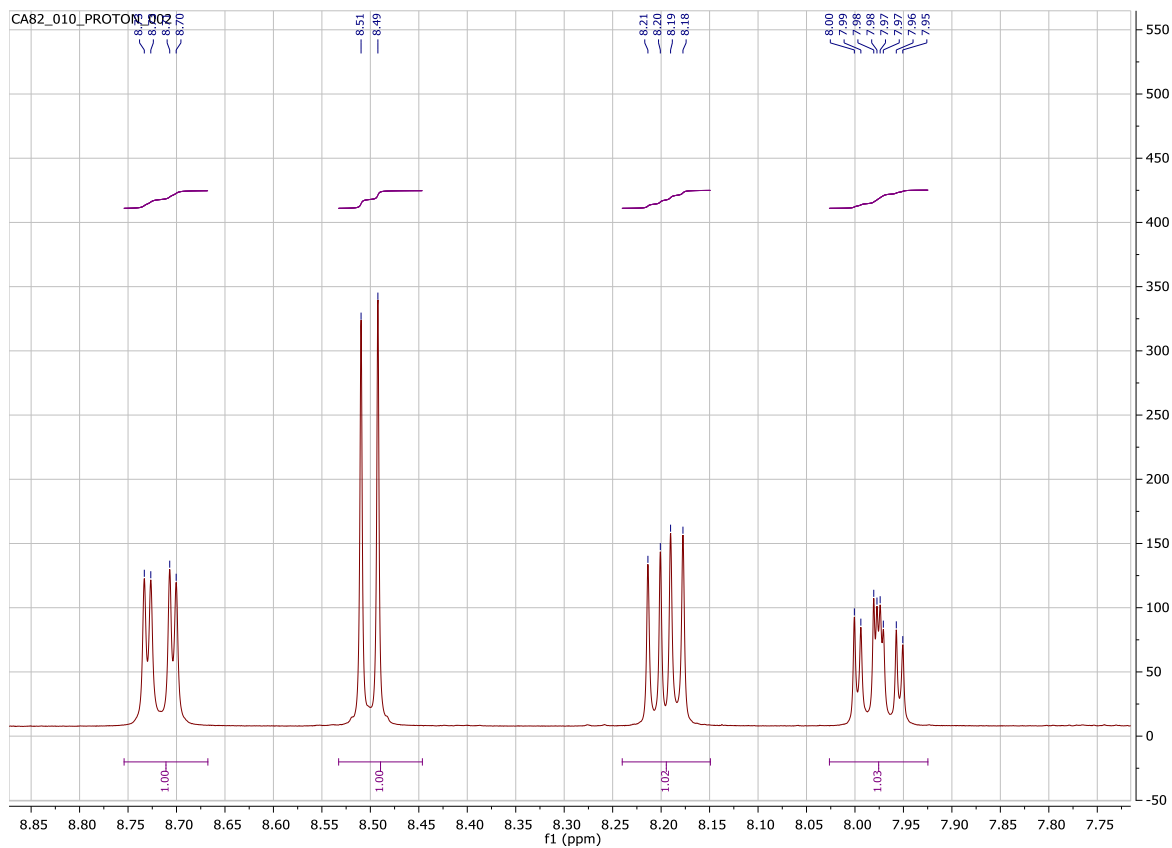

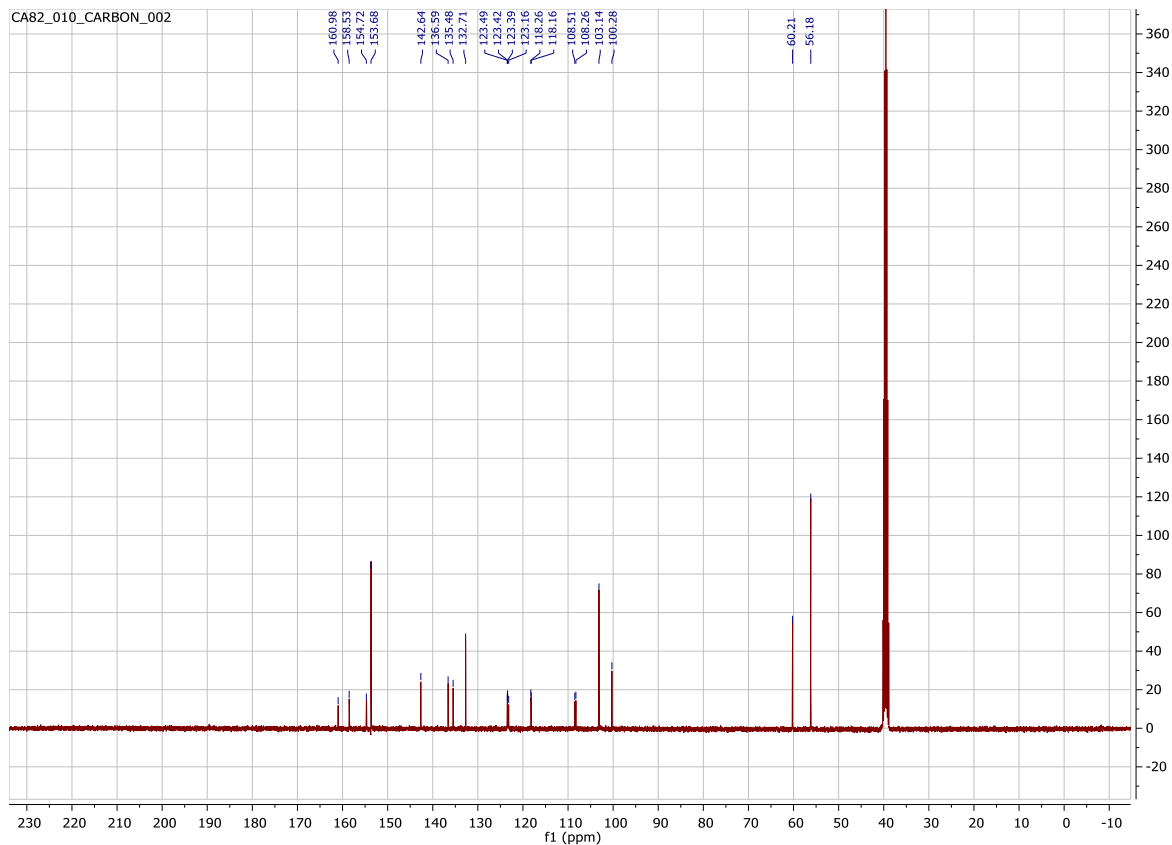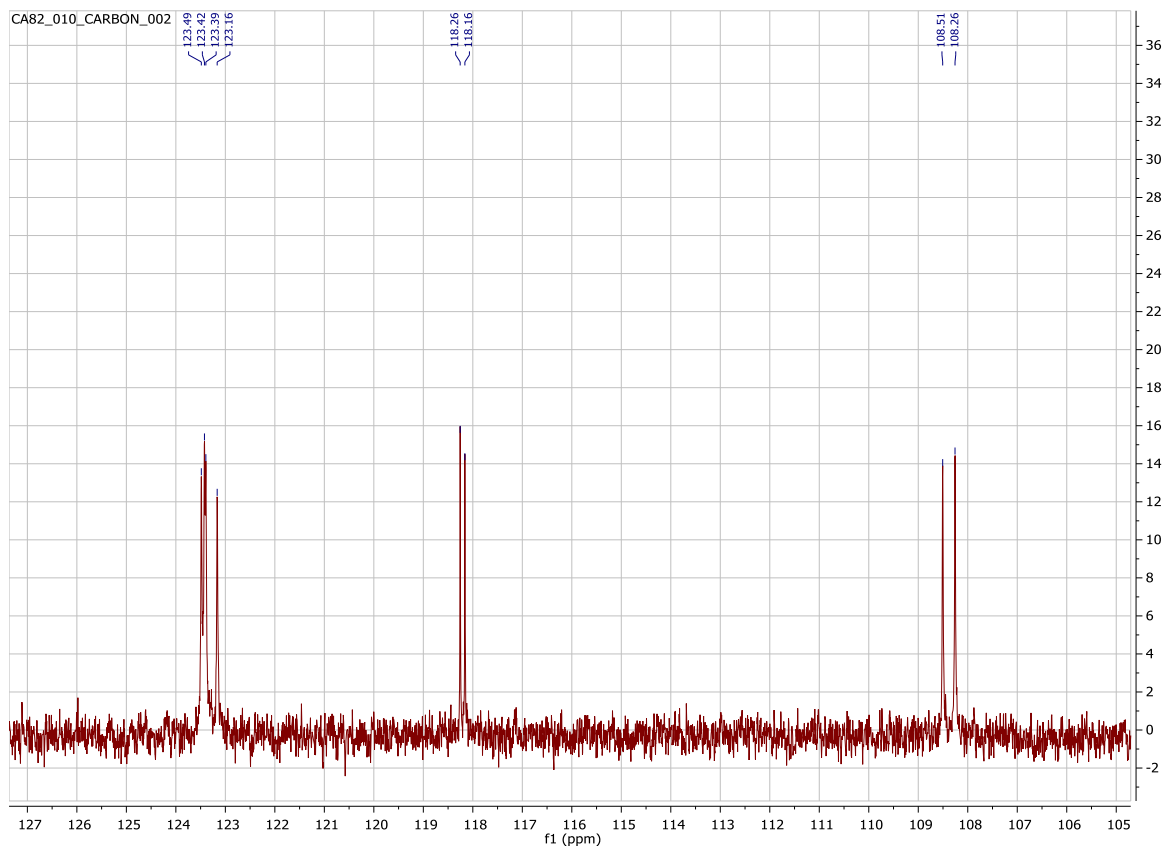

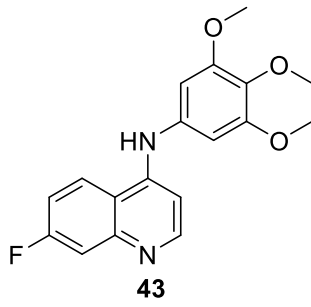

7-Fluoro-N-(3,4,5-trimethoxyphenyl)quinolin-4-amine (**43**)

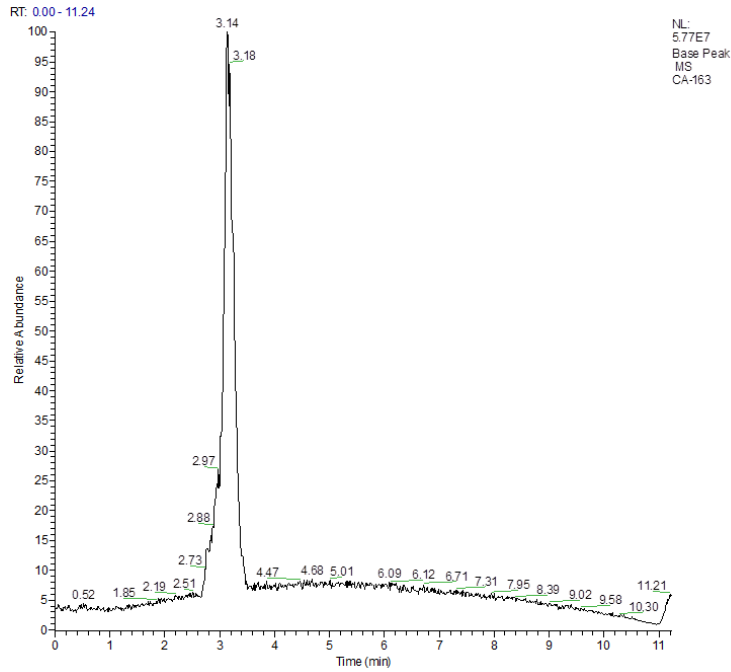

CA-163 #191-232 RT: 2.85-3.46 AV: 42 NL: 2.34E7  
T: FTMS + p ESIFull.ms[100.00-2000.00]

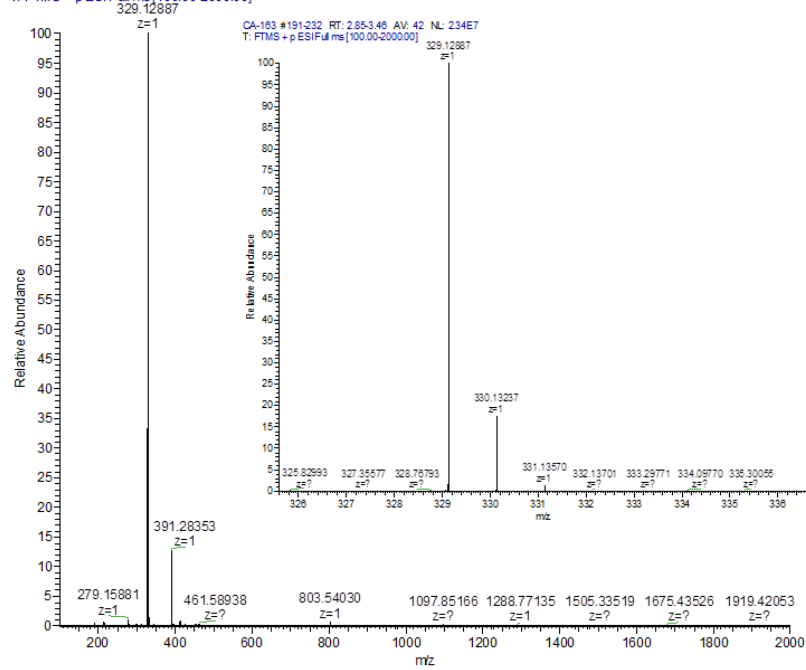



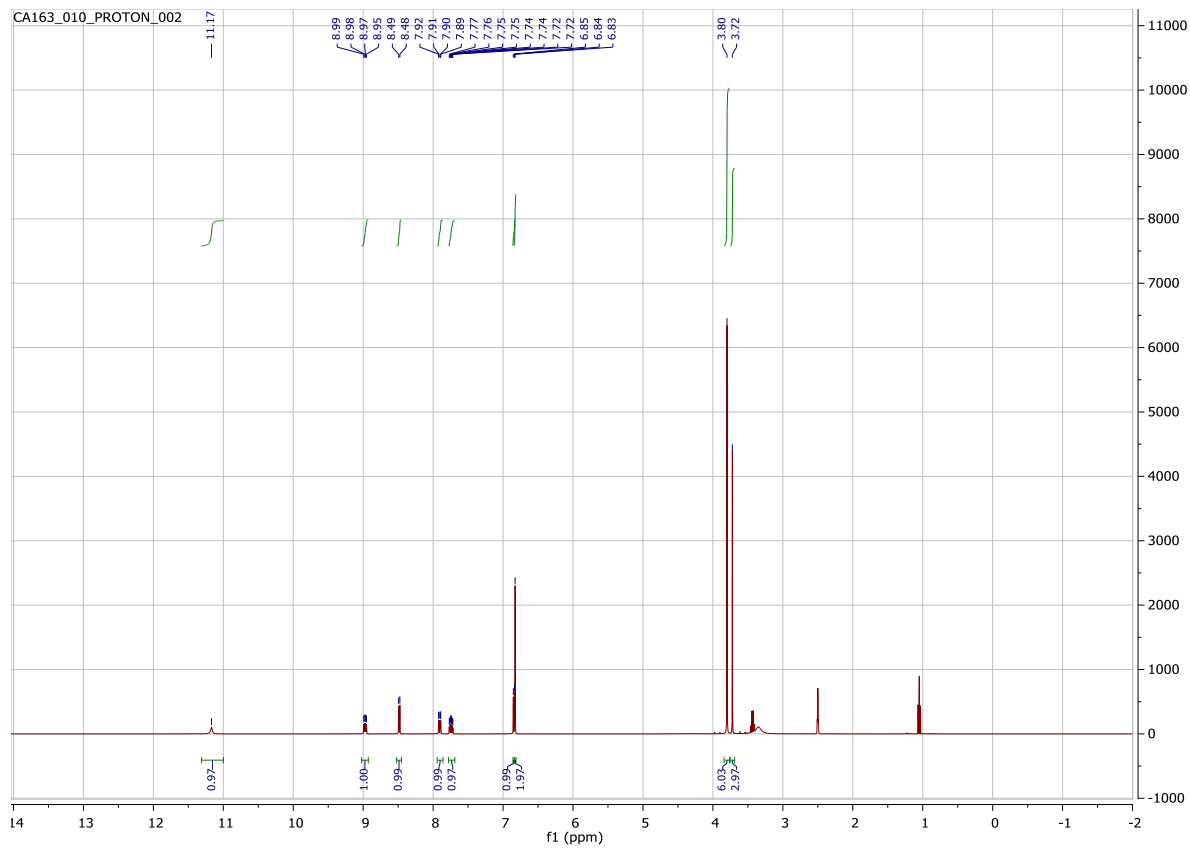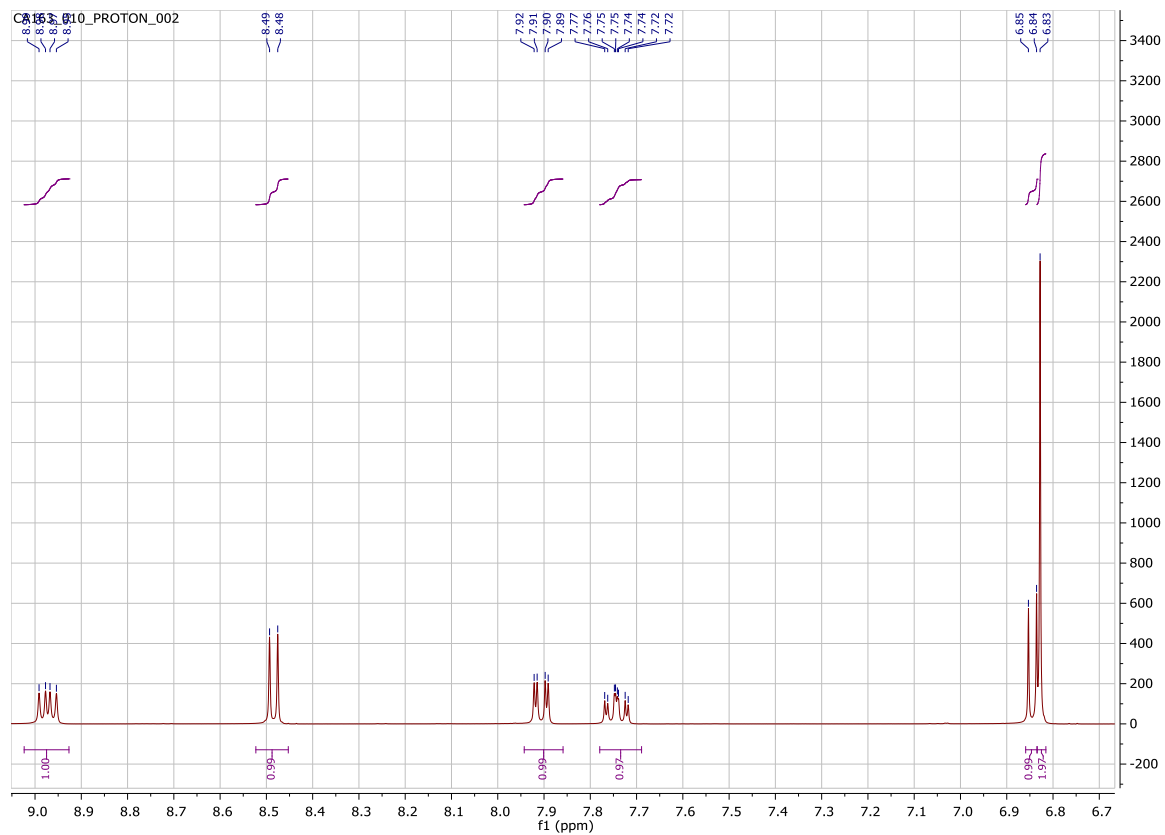

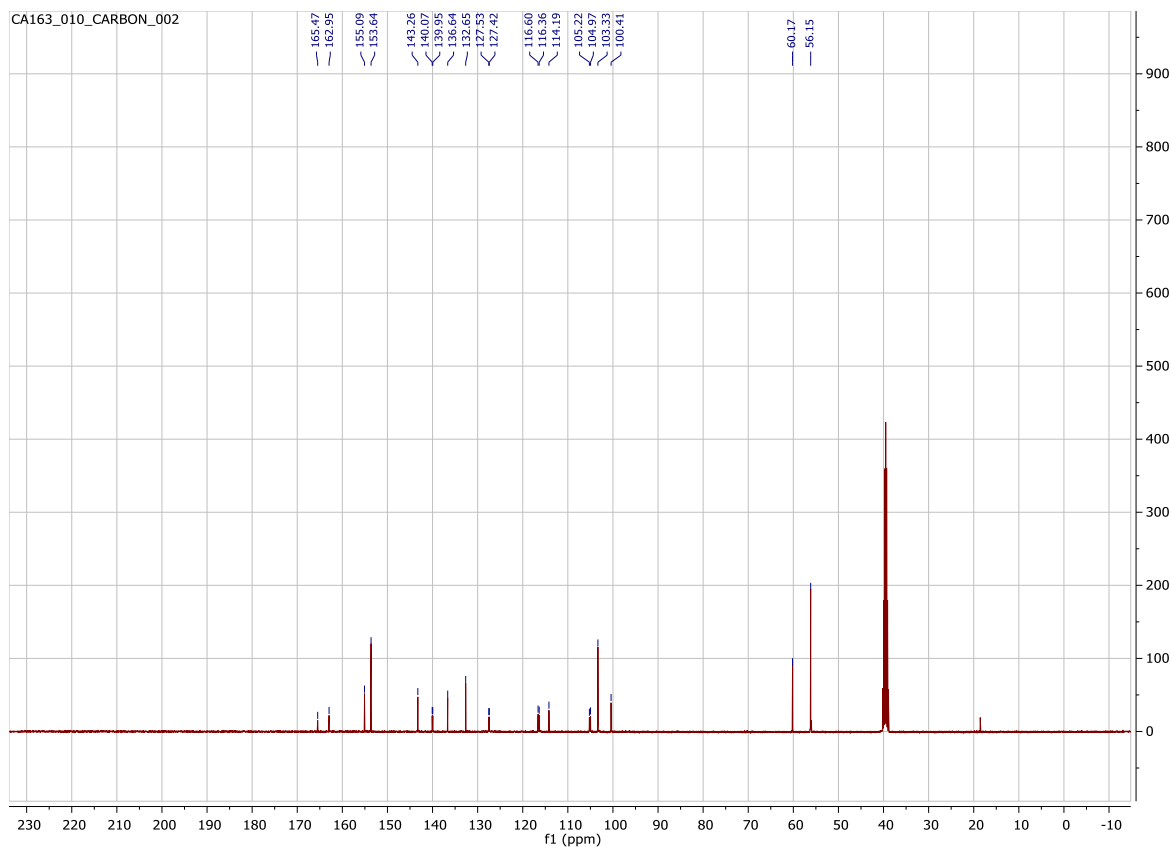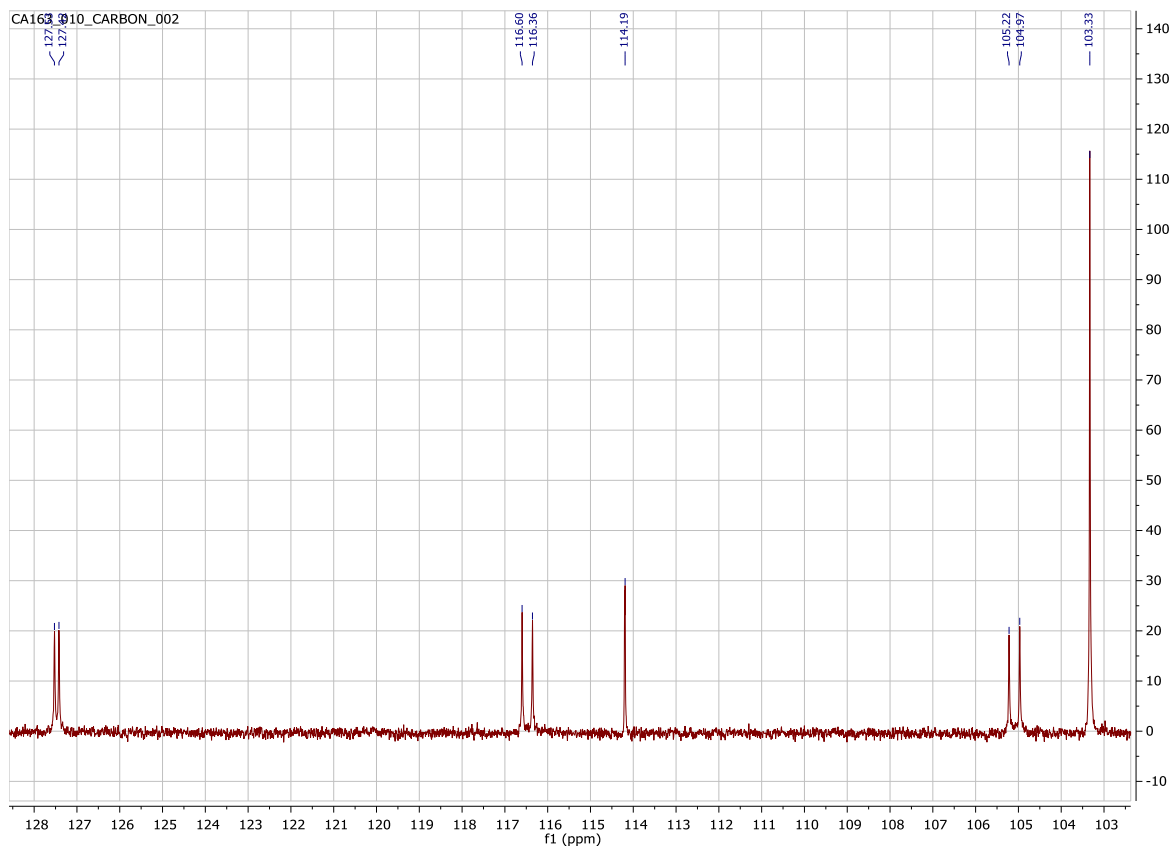

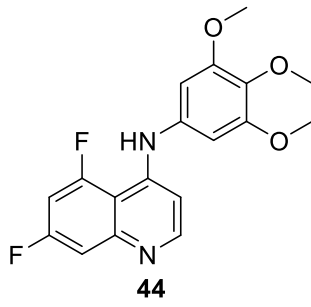

5,7-Difluoro-N-(3,4,5-trimethoxyphenyl)quinolin-4-amine (**44**)

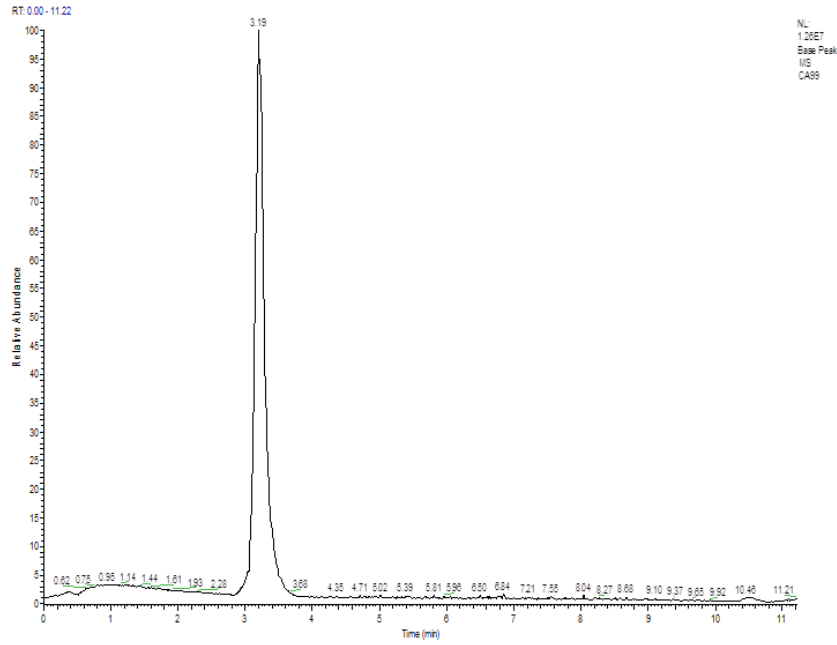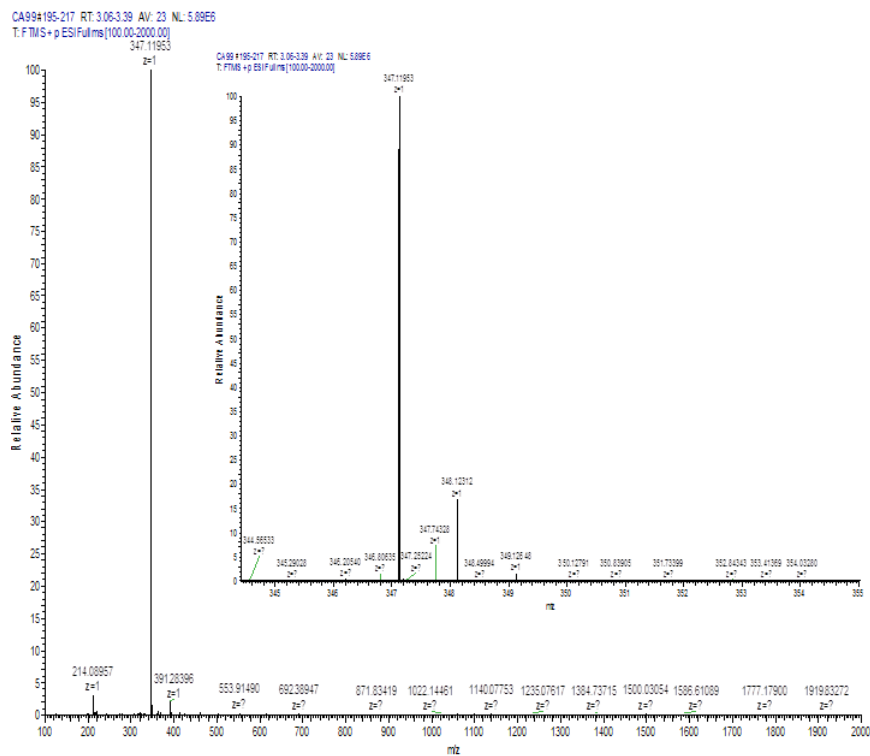

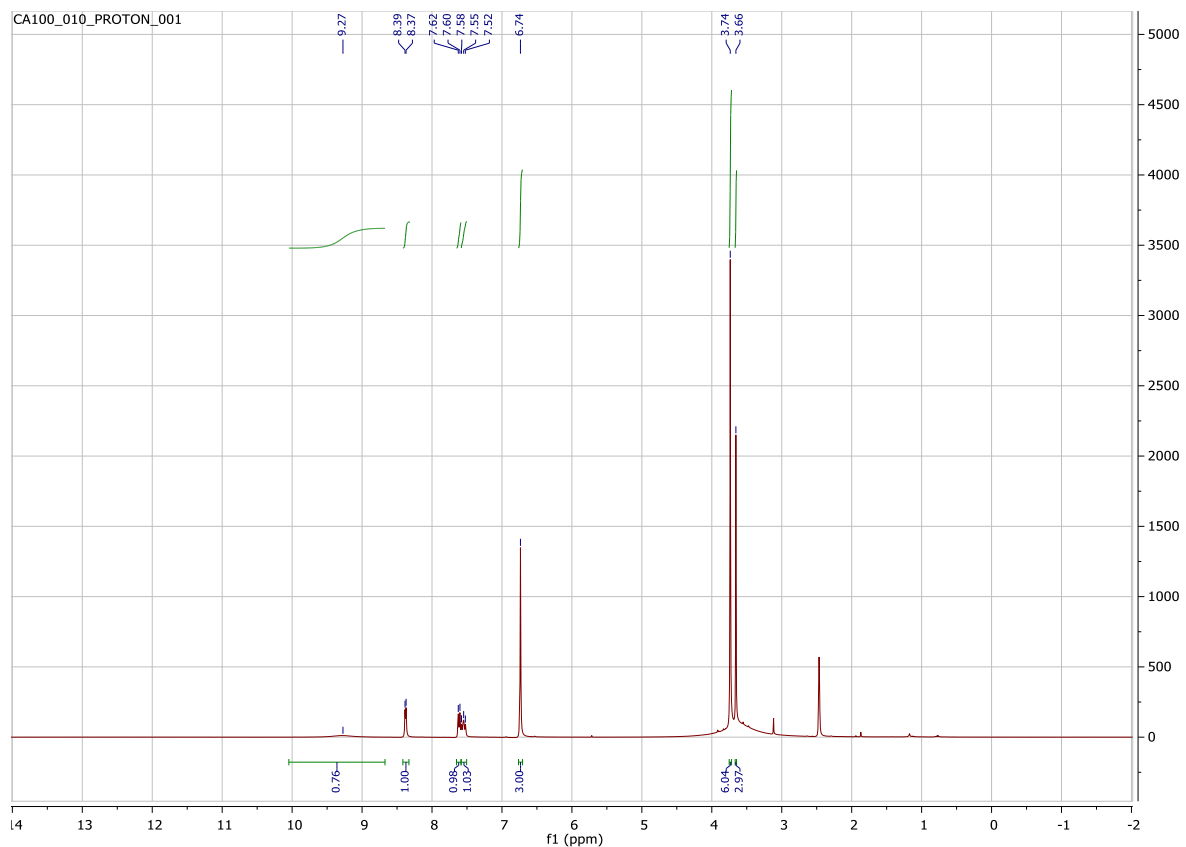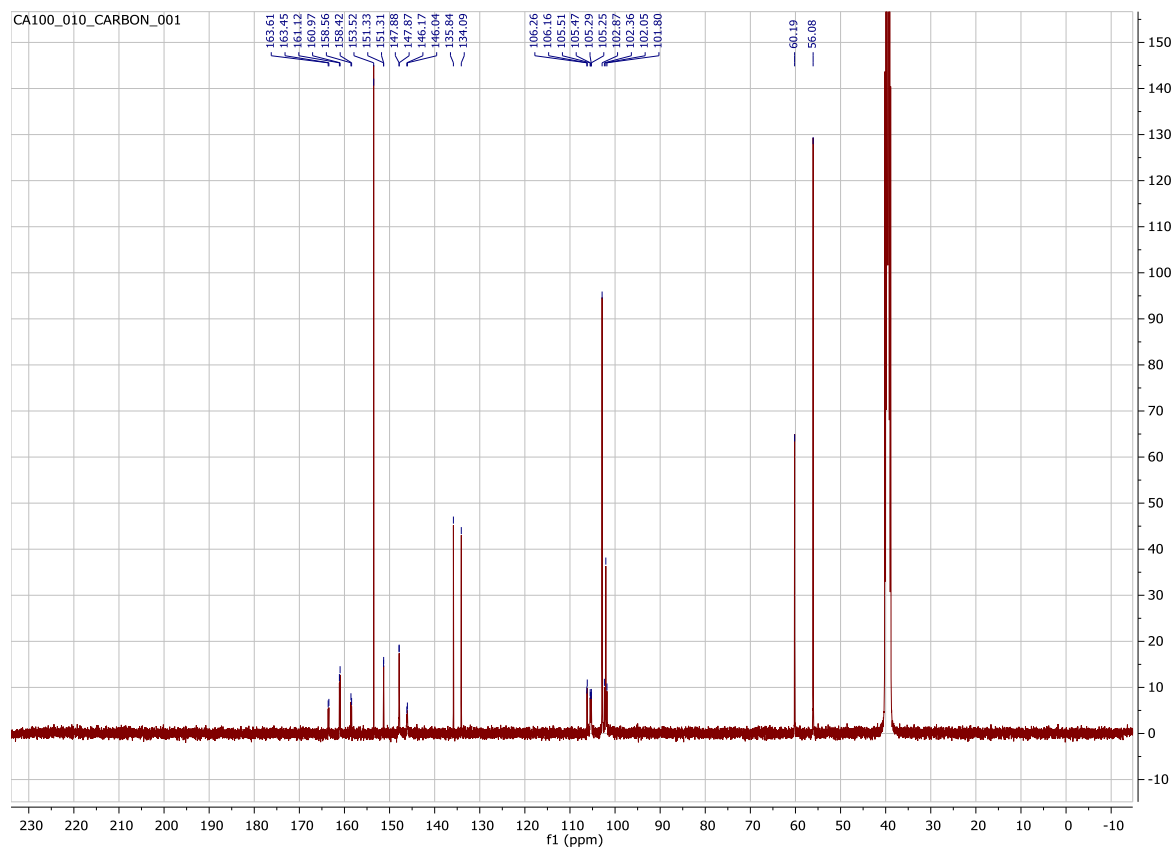

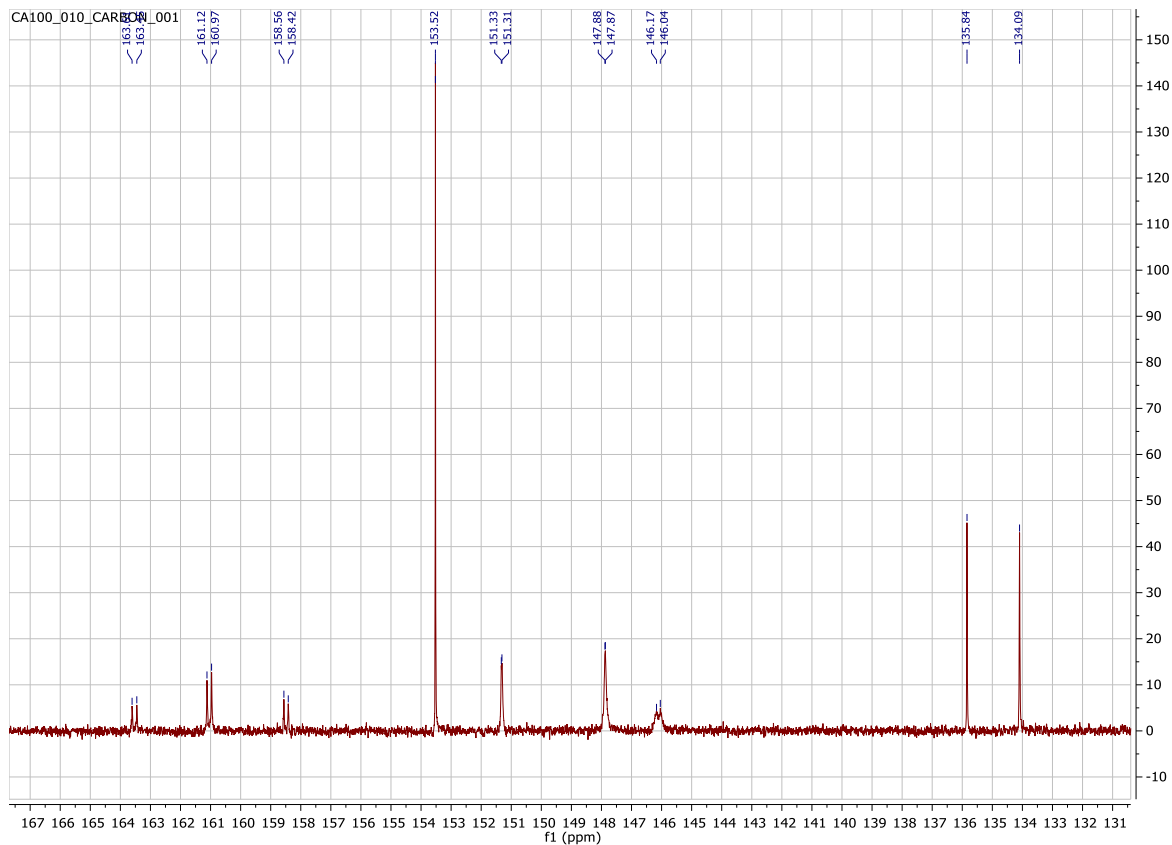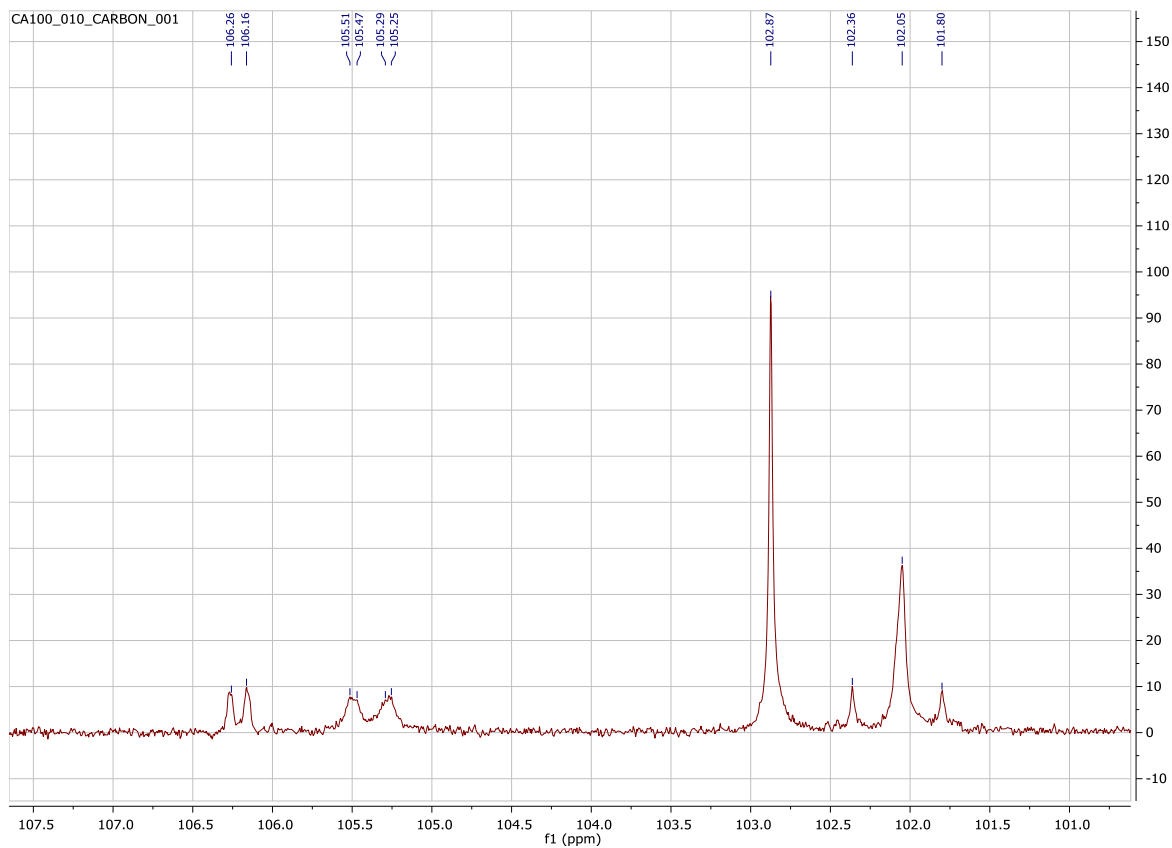

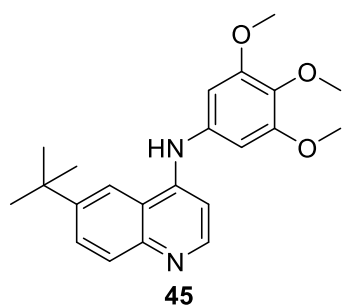

6-(*tert*-Butyl)-*N*-(3,4,5-trimethoxyphenyl)quinolin-4-amine (**45**)

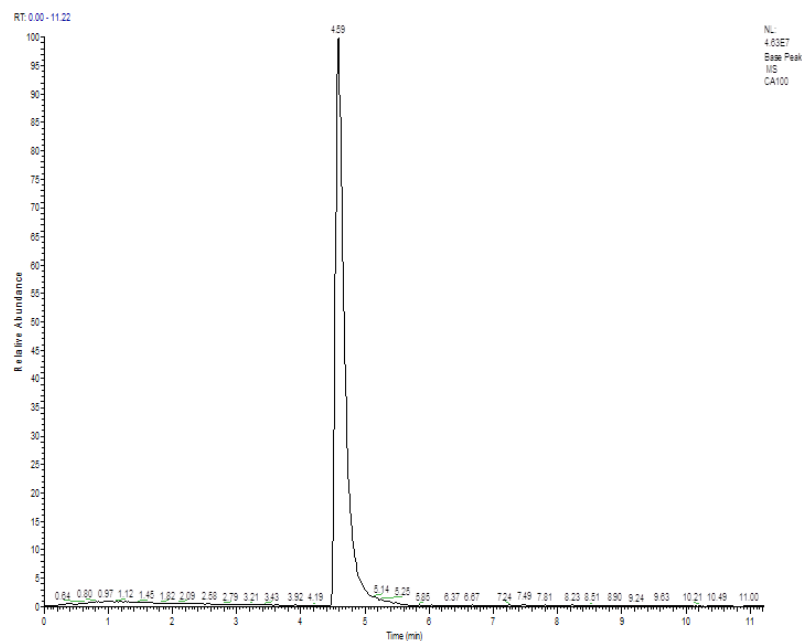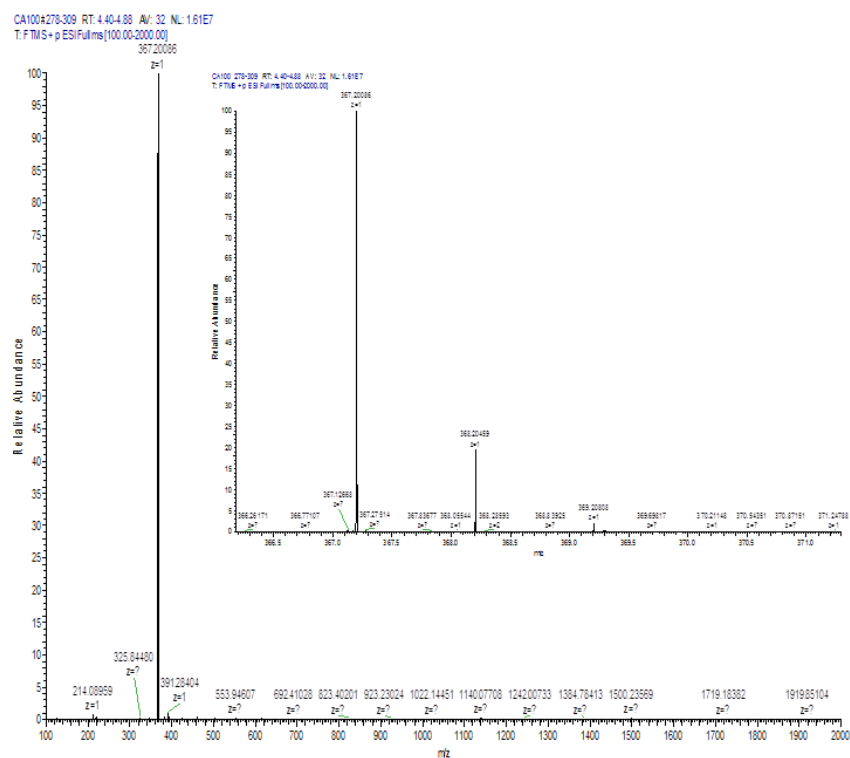

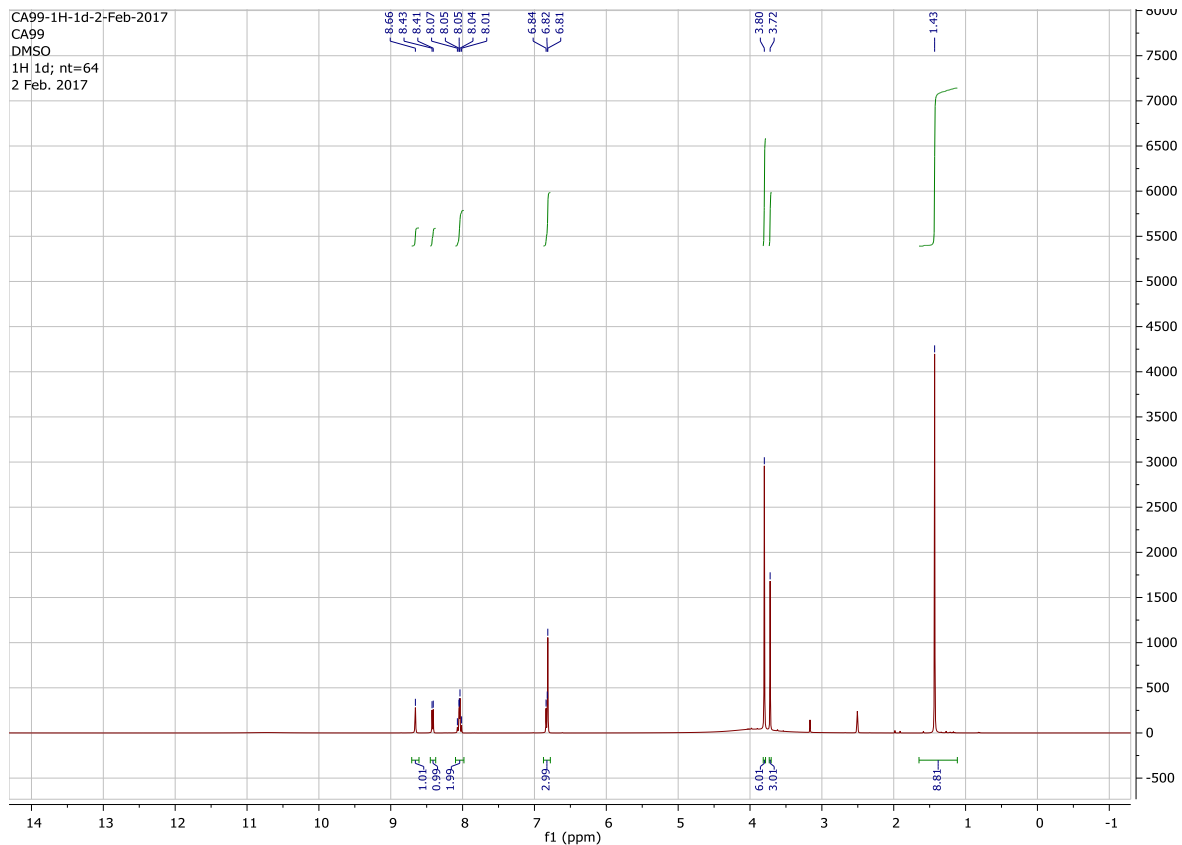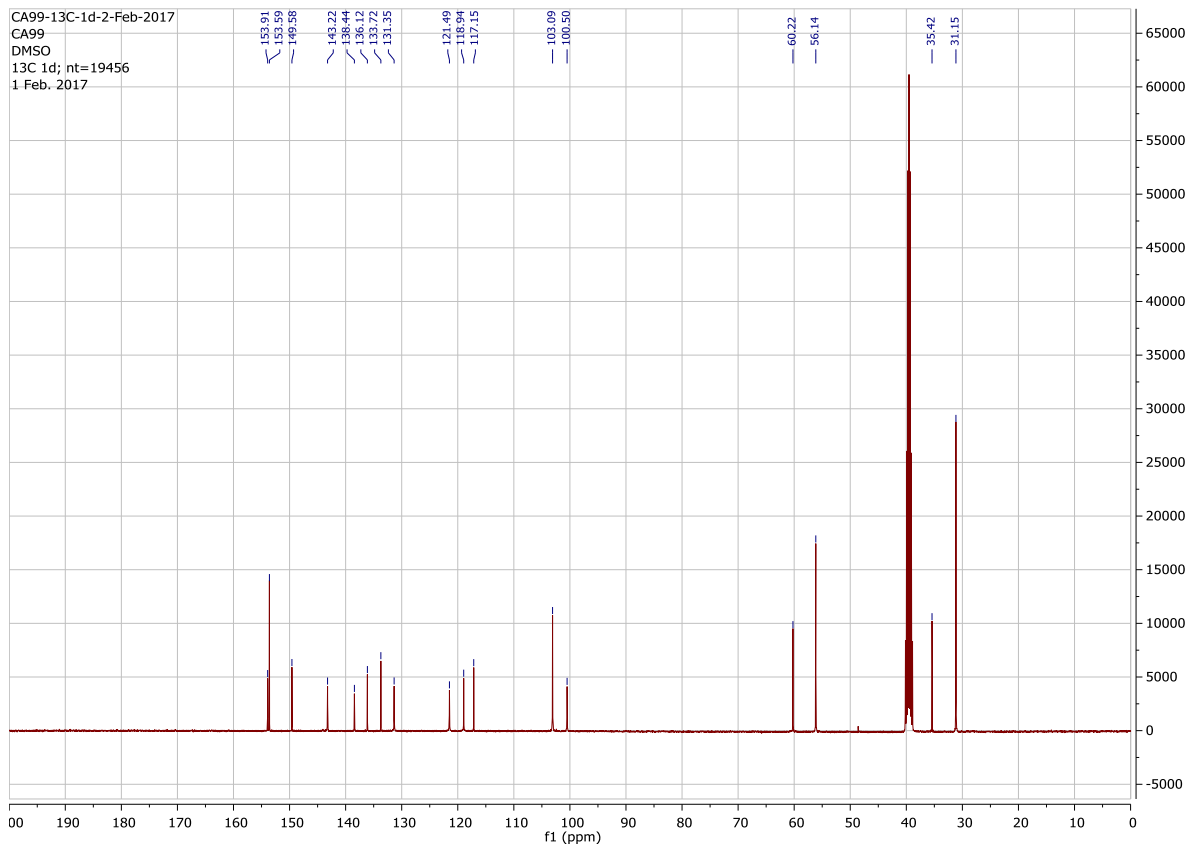

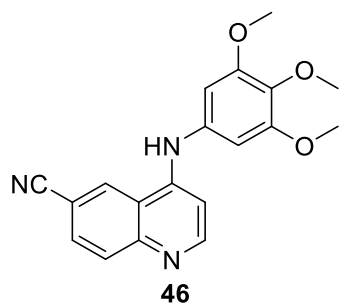

4-((3,4,5-Trimethoxyphenyl)amino)quinoline-6-carbonitrile (**46**)

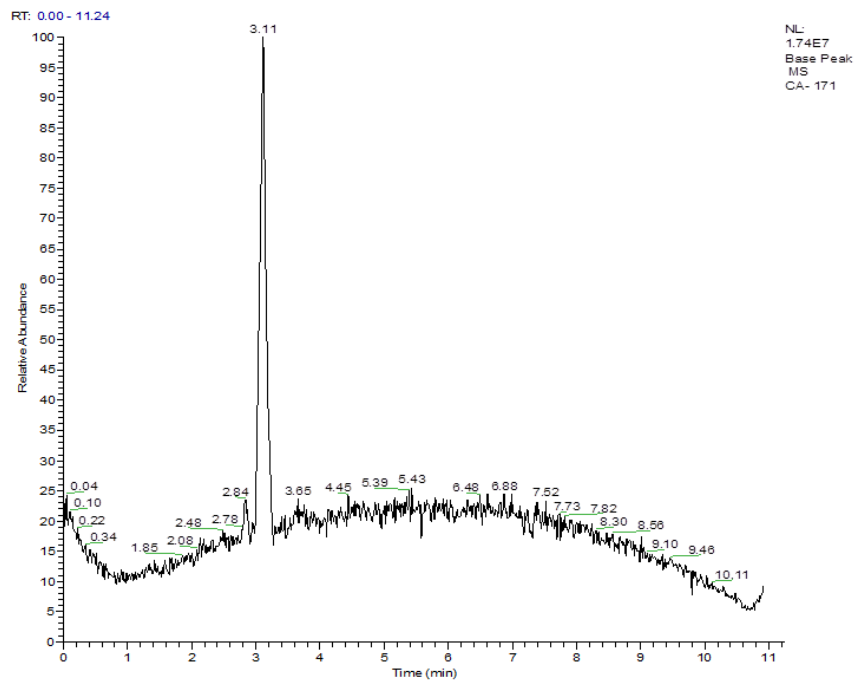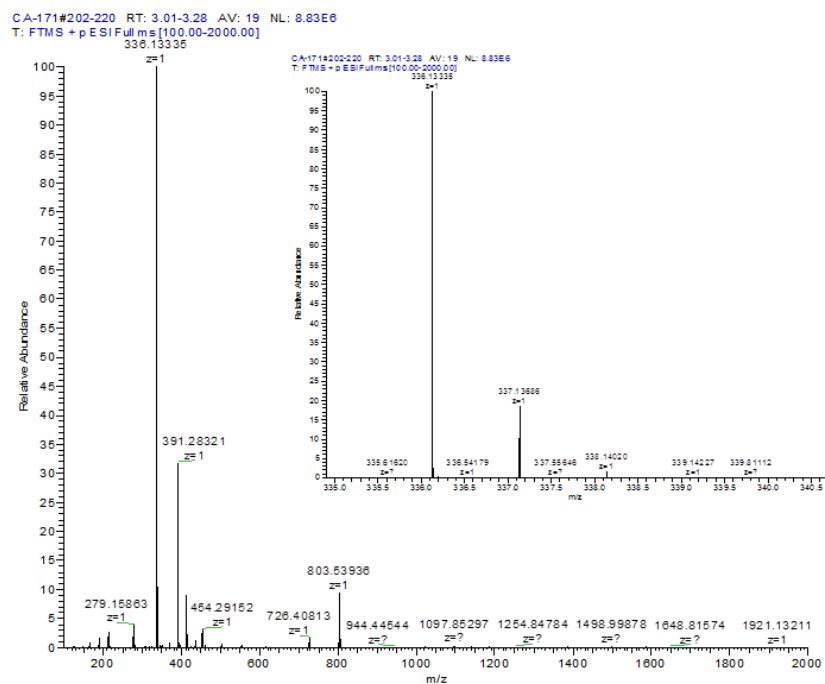



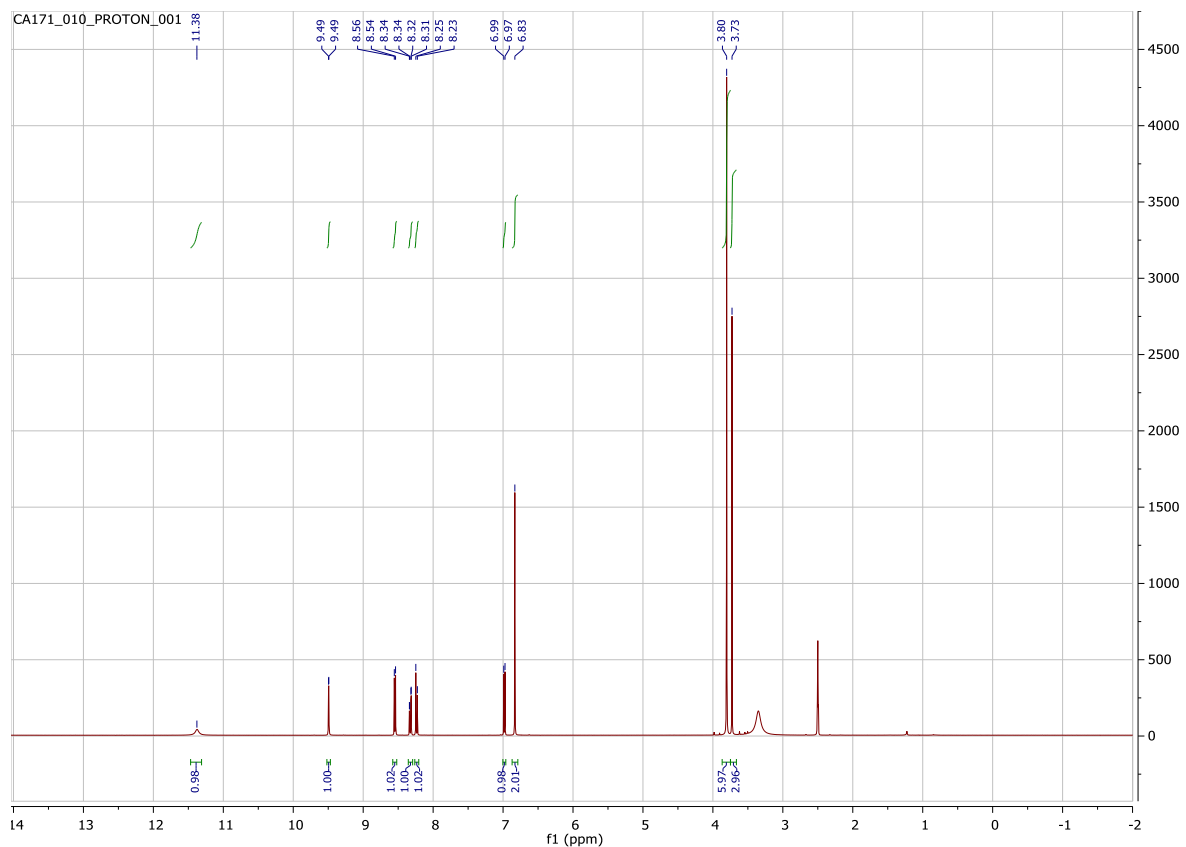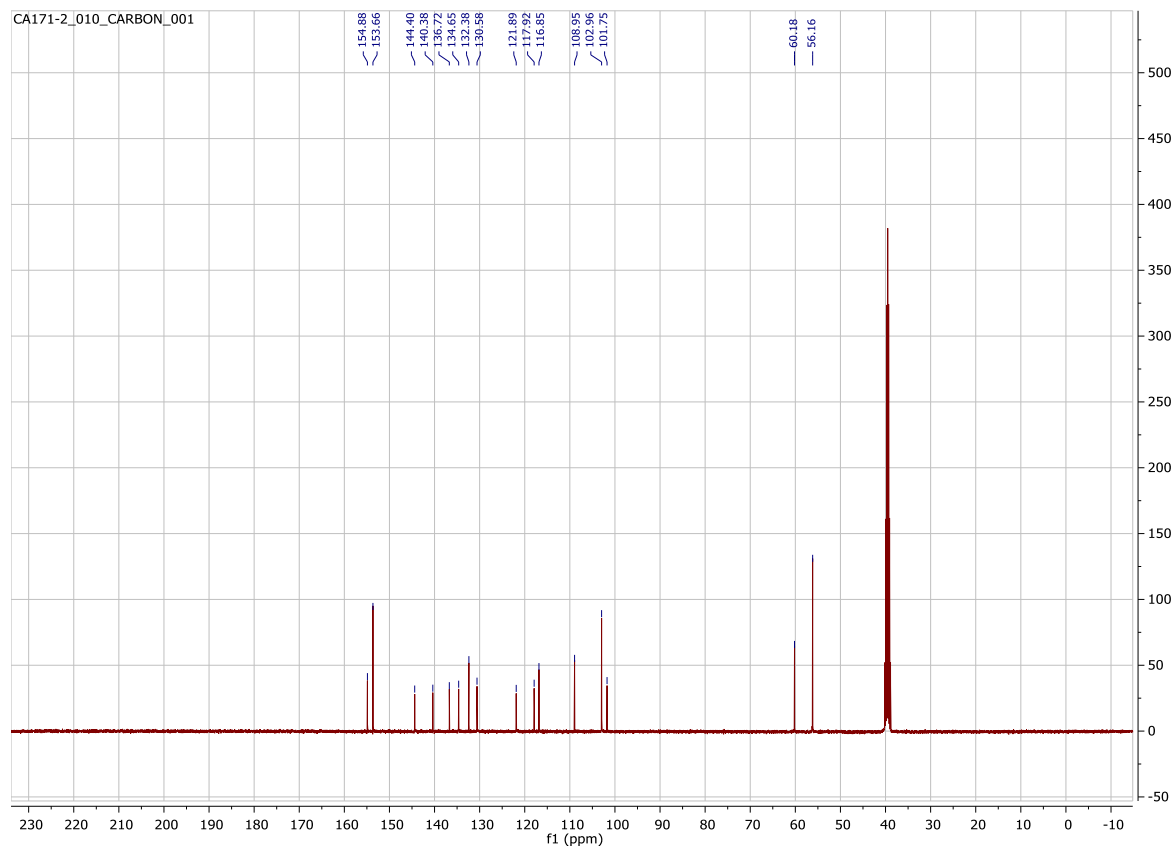

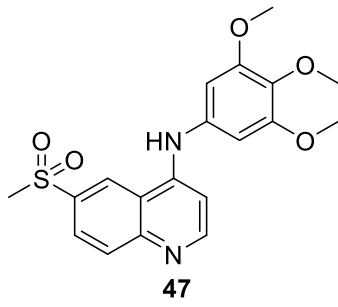

6-(Methylsulfonyl)-*N*-(3,4,5-trimethoxyphenyl)quinolin-4-amine (**47**)

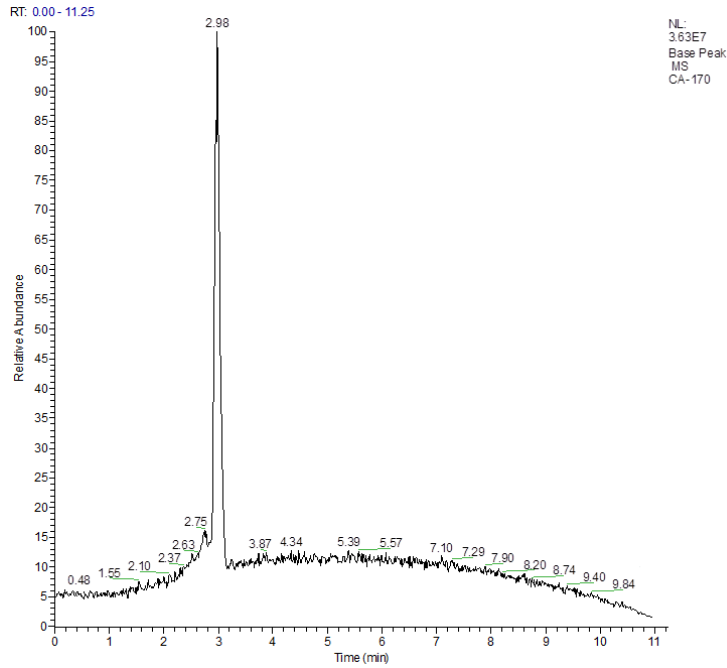

CA-170 170202204130 #189-211 RT: 2.82-3.15 AV: 23 NL: 1.37E7  
T: FTMS + pESI Full ms [100.00-2000.00]

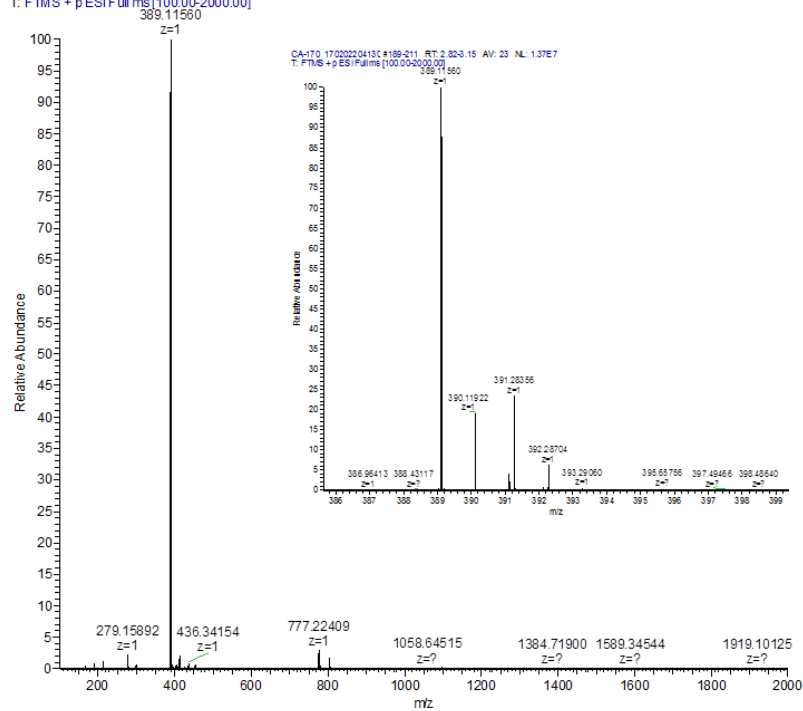

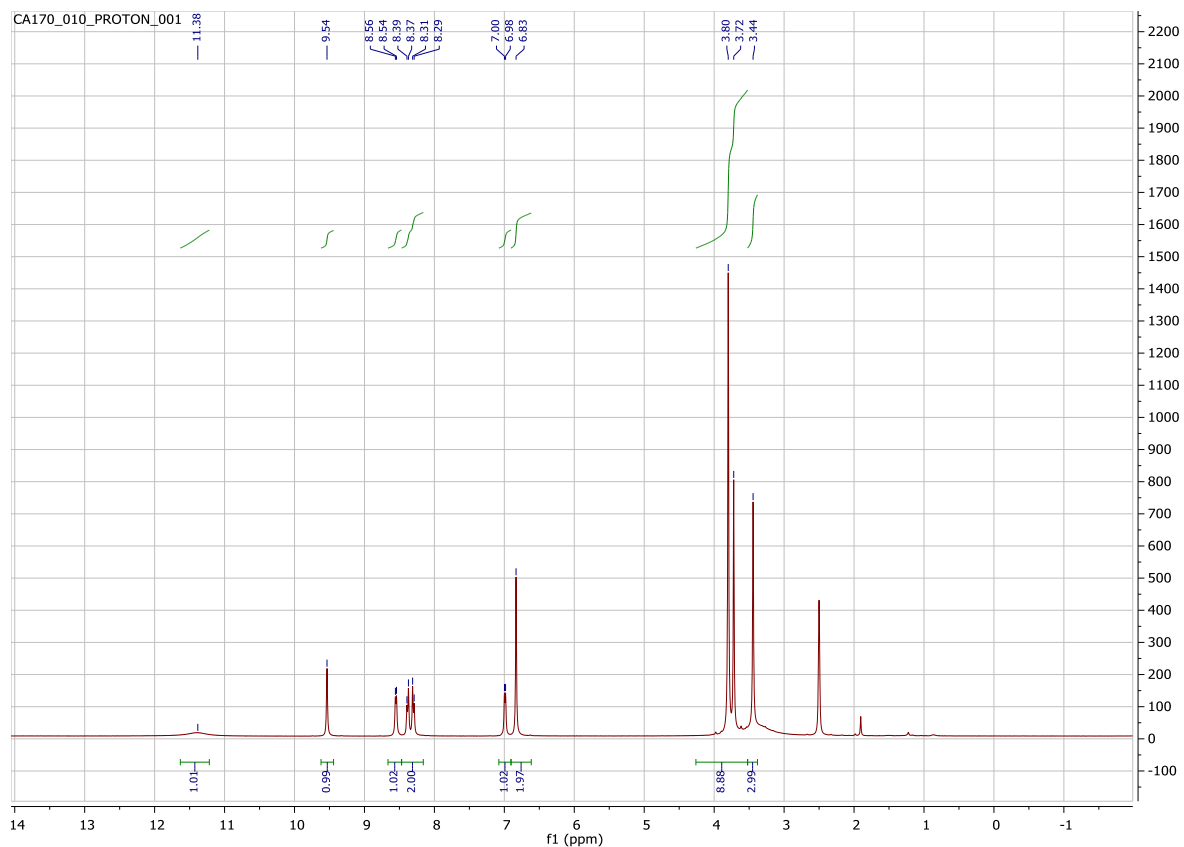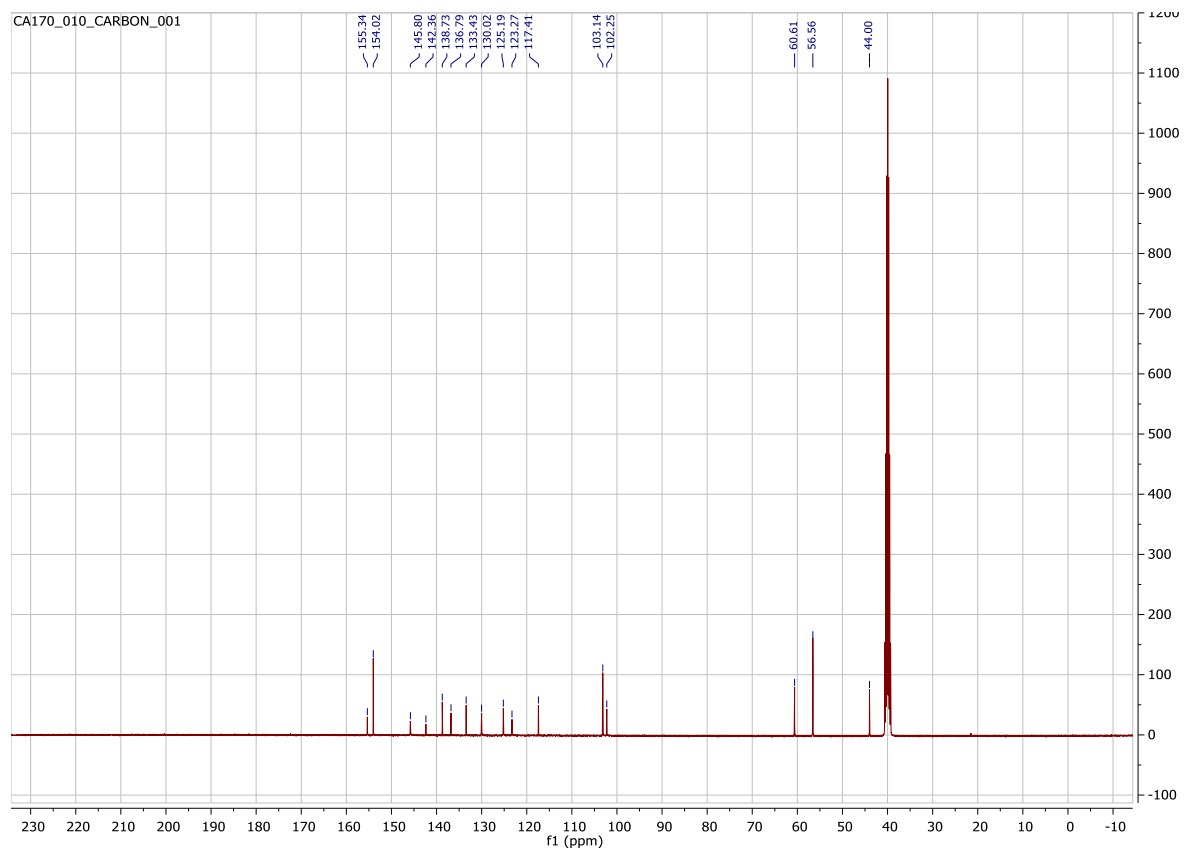

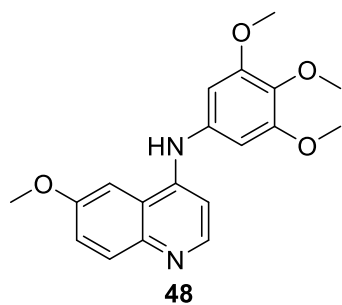

6-Methoxy-*N*-(3,4,5-trimethoxyphenyl)quinolin-4-amine (**48**)

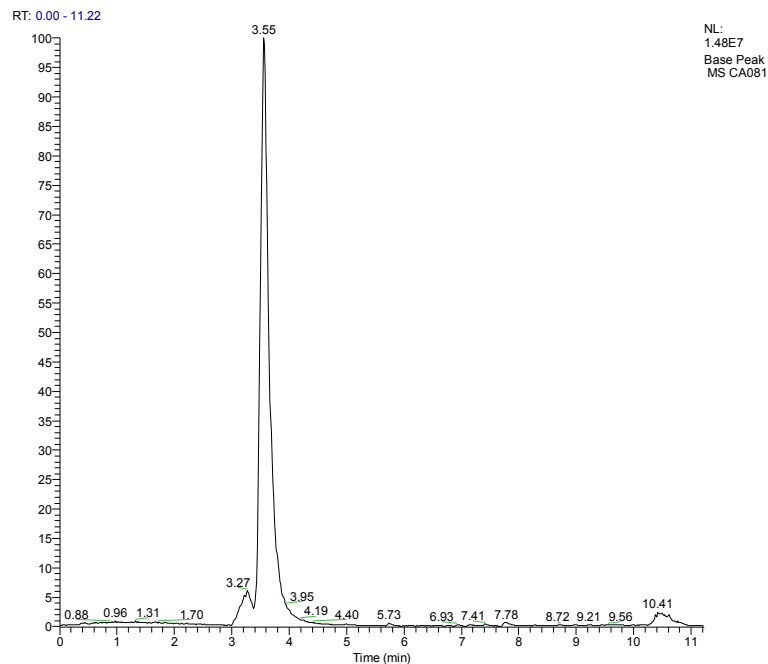

082216\_AG\_CA81\_CA\_Timwilson #1-100 RT: 0.01-1.48 AV: 100 NL: 3.73E6  
T: FTMS + p ESI Full ms [150.00-2000.00]

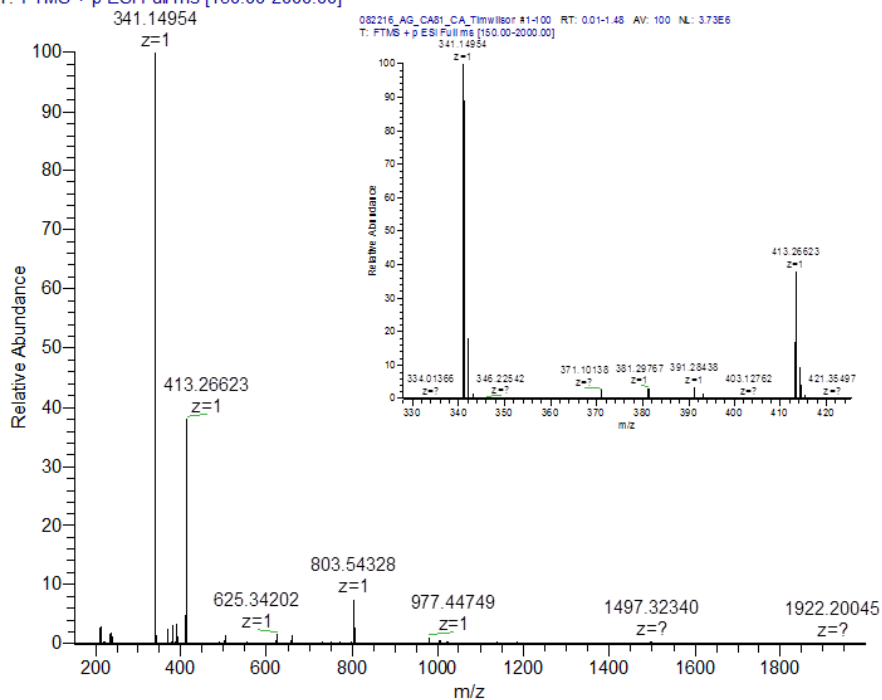

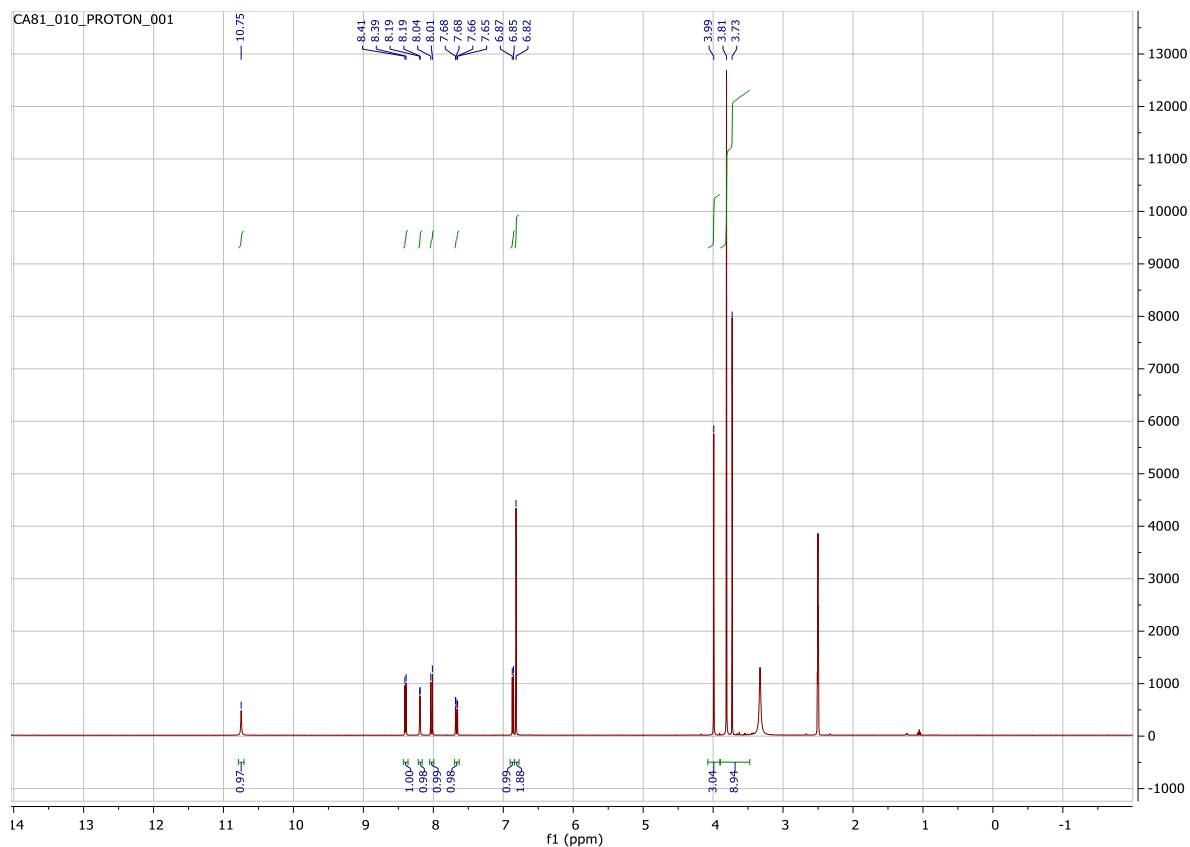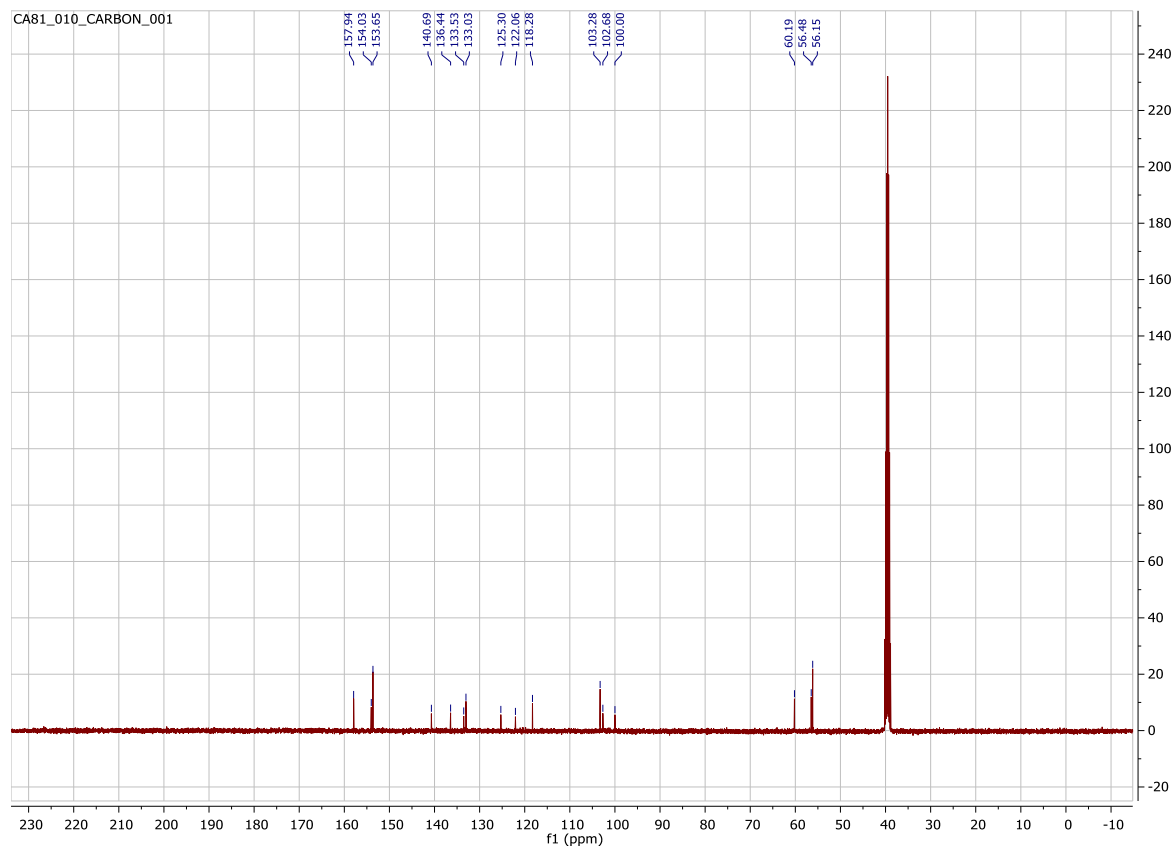

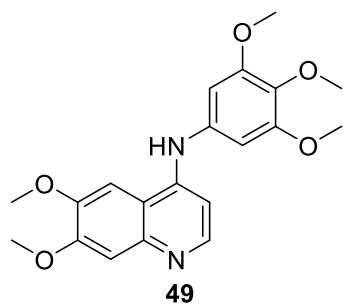

6,7-Dimethoxy-N-(3,4,5-trimethoxyphenyl)quinolin-4-amine (**49**)

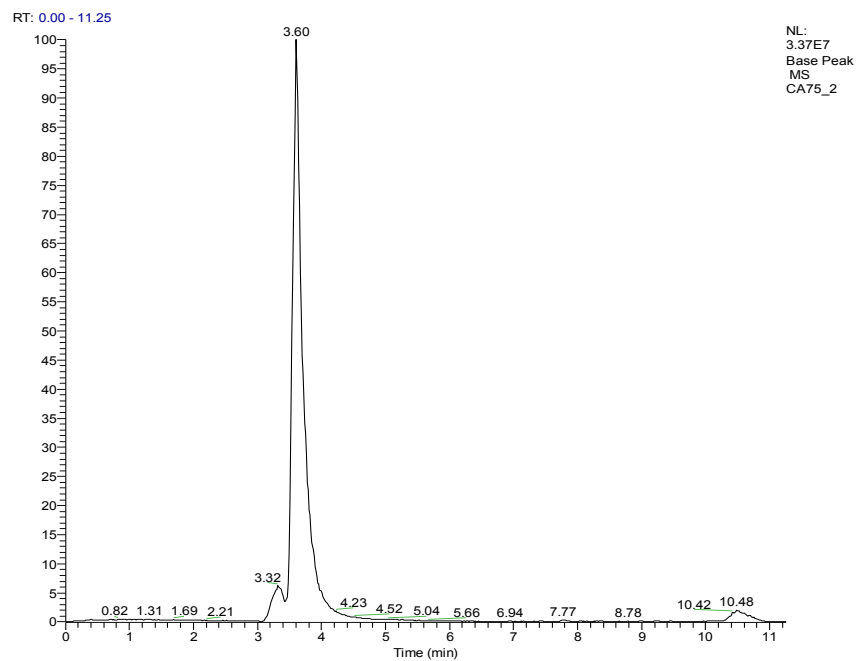

082216\_AG\_CA75\_CA\_Timwilson #1-100 RT: 0.01-1.48 AV: 100 NL: 3.89E6  
T: FTMS + p ESI Full ms [150.00-2000.00]

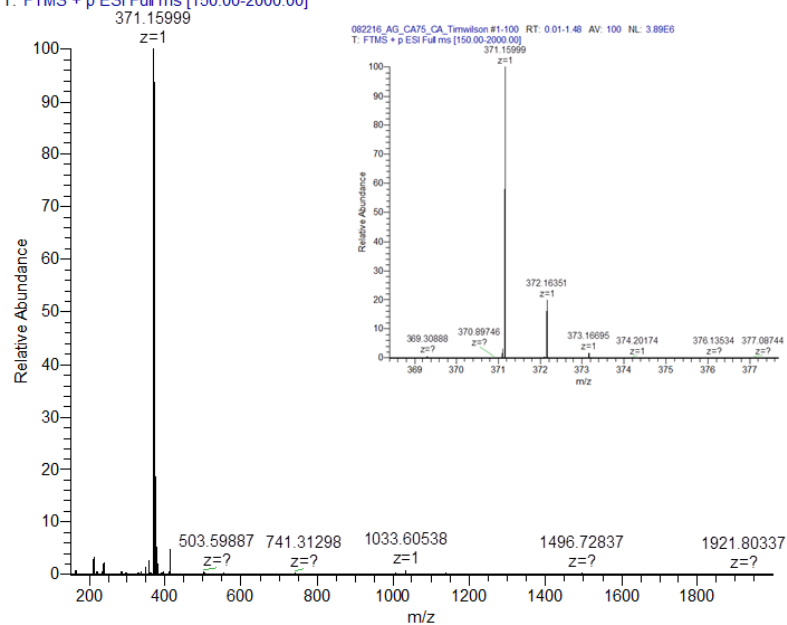

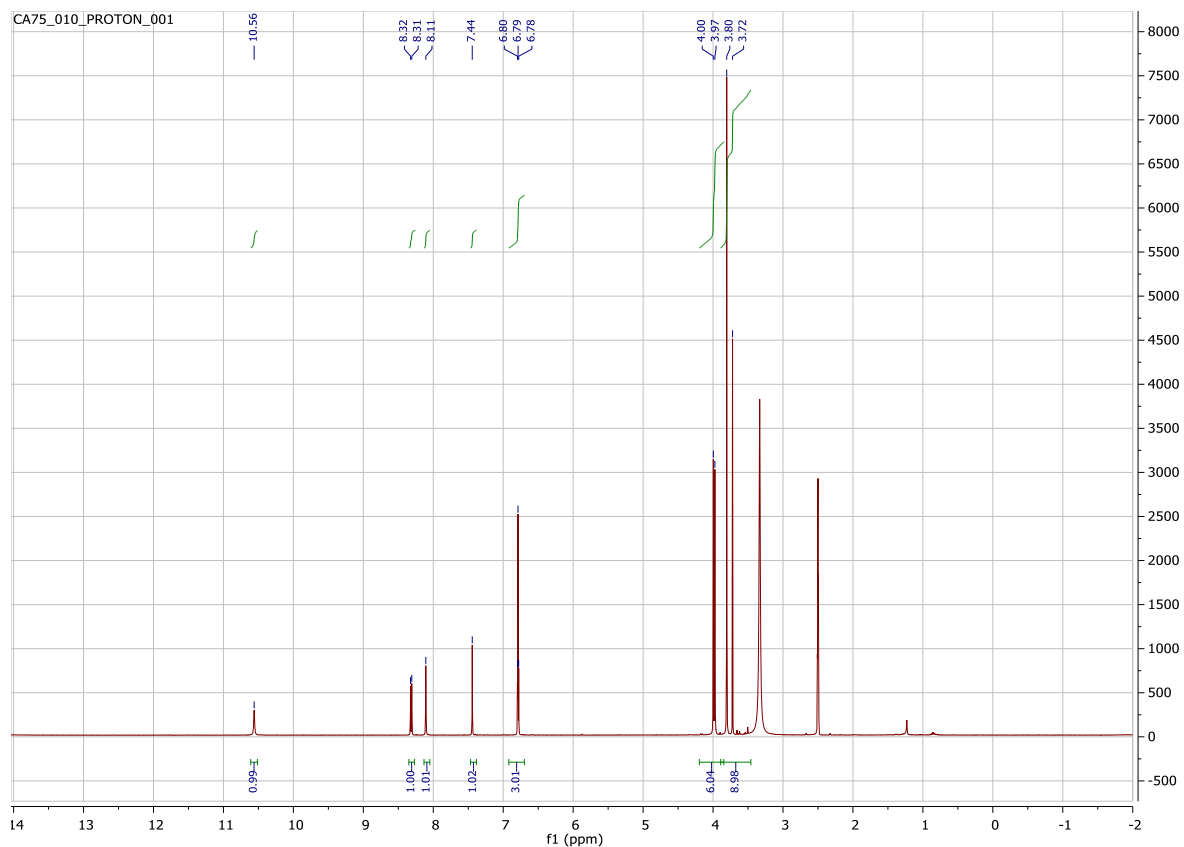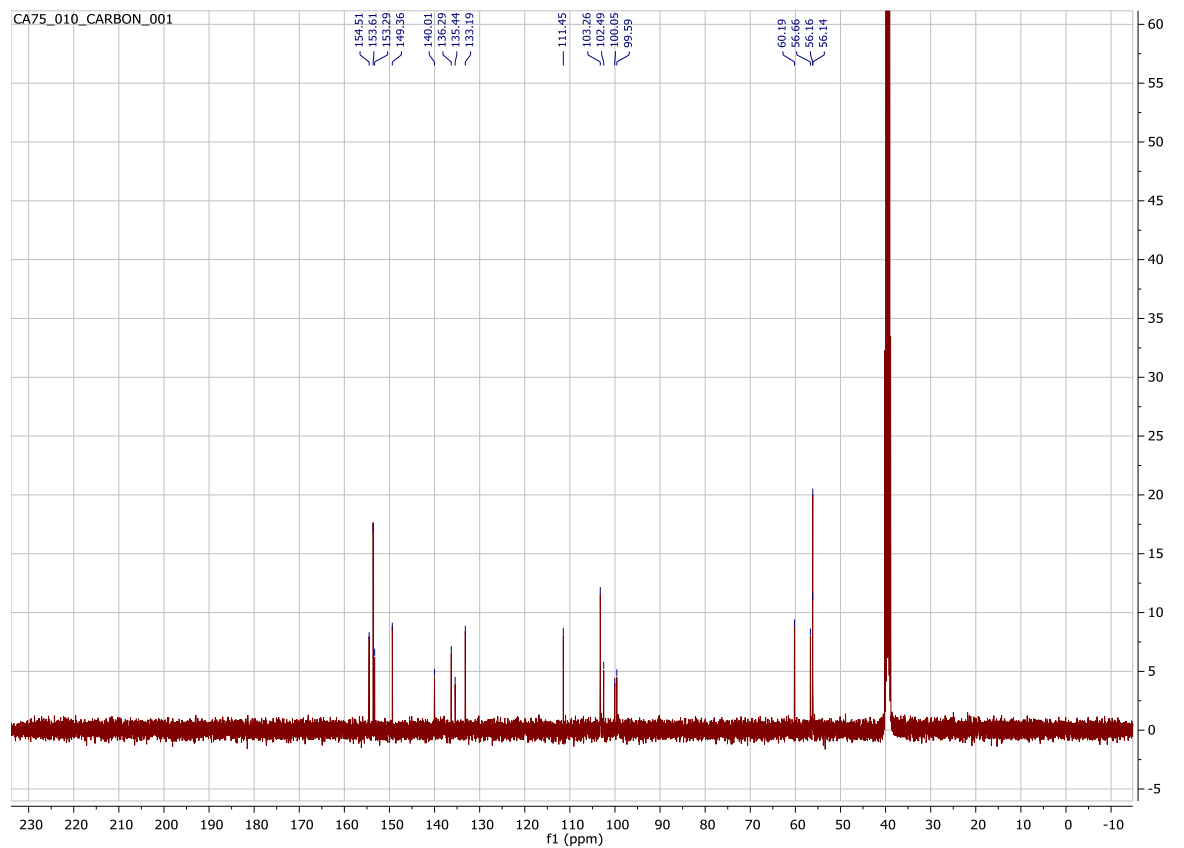

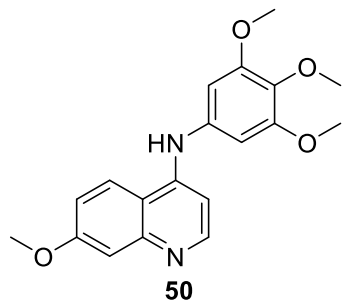

7-Methoxy-N-(3,4,5-trimethoxyphenyl)quinolin-4-amine (**50**)

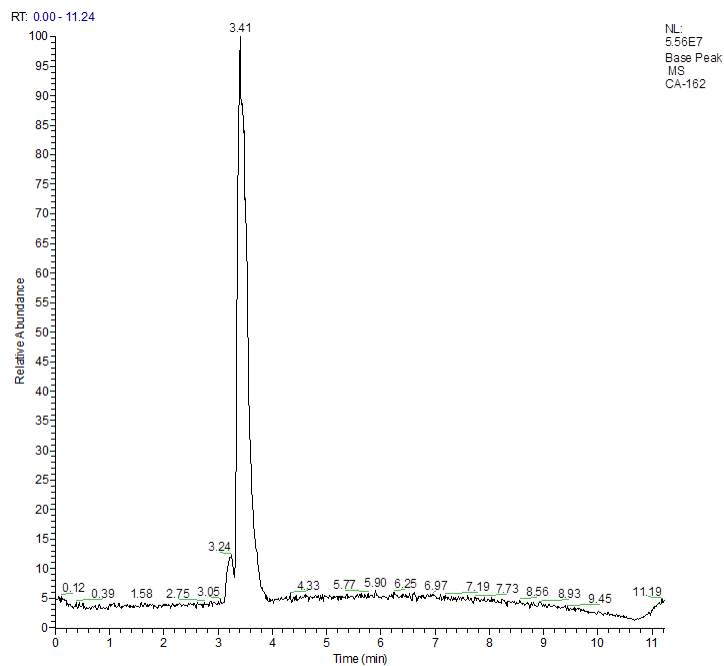

CA-162 #217-254 RT: 3.23-3.78 AV: 38 NL: 2.22E7  
T: FTMS + p ESI Full ms [100.00-2000.00]

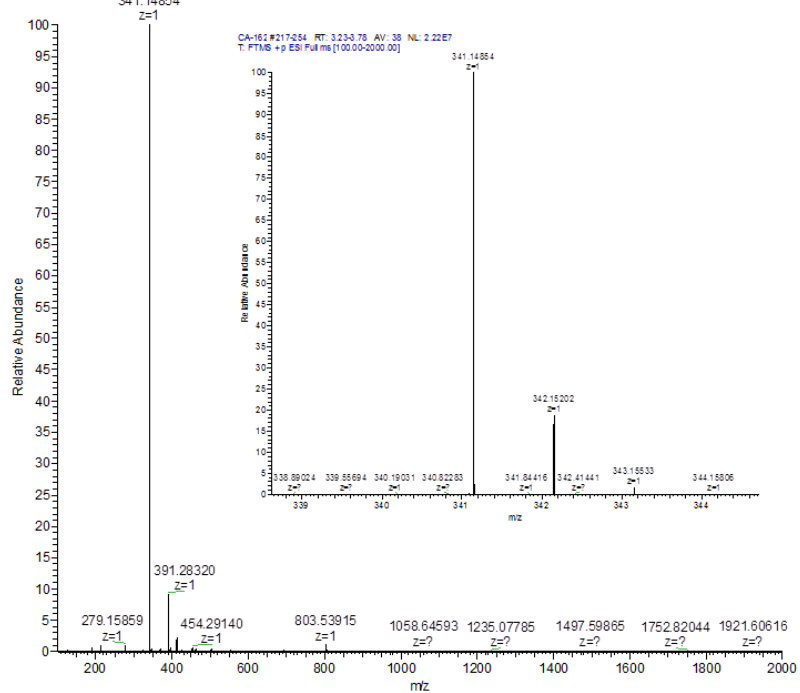



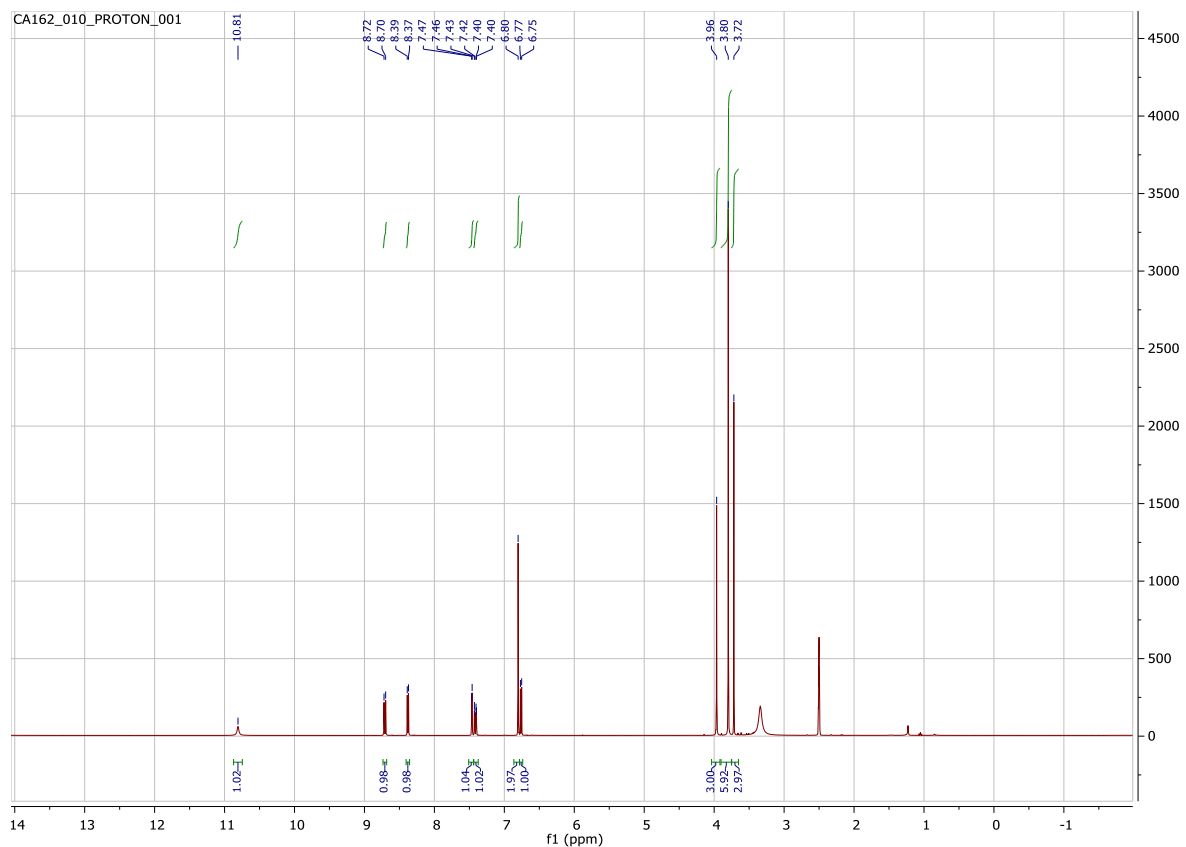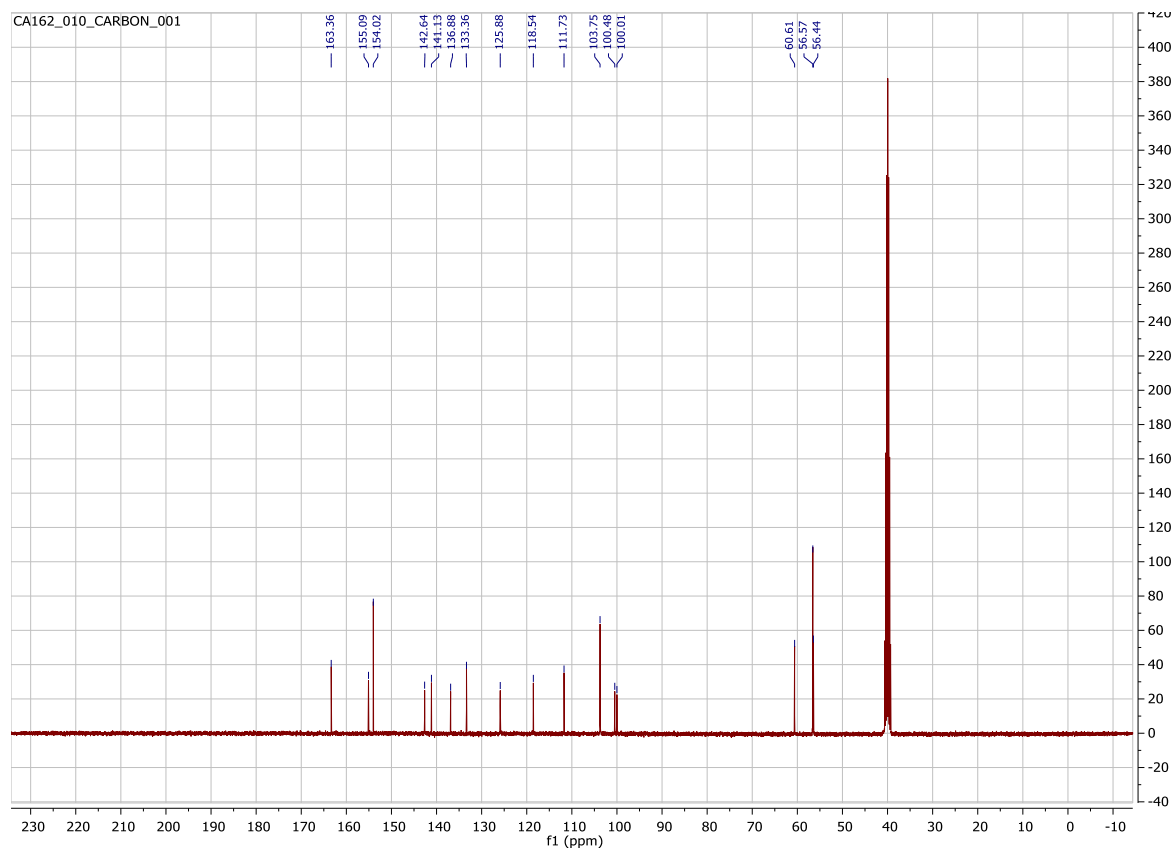

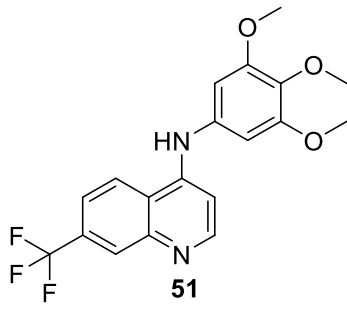

7-(Trifluoromethyl)-N-(3,4,5-trimethoxyphenyl)quinolin-4-amine (**51**)

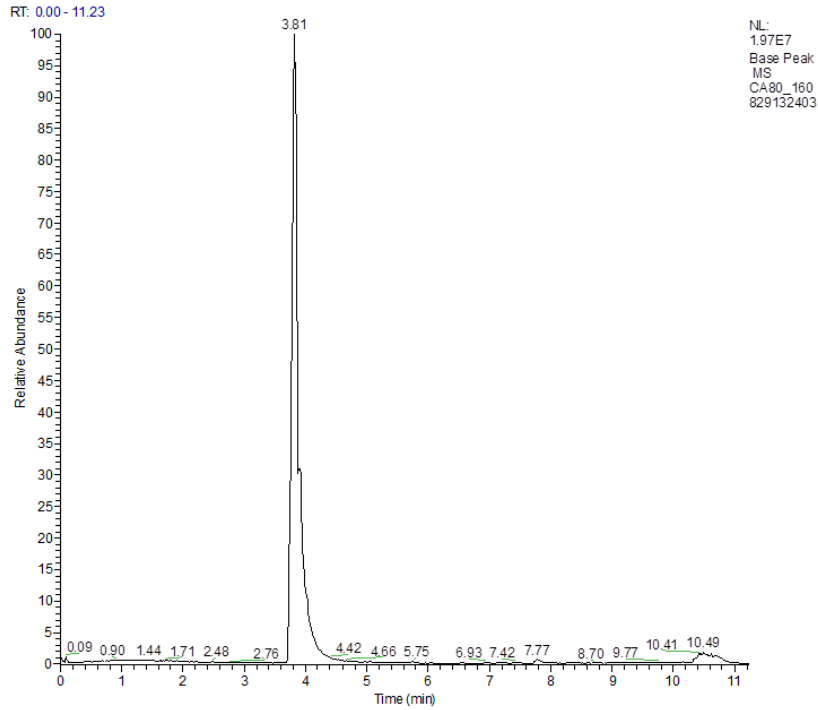

082216\_AG\_CA80\_CA\_Timwilson #1-100 RT: 0.00-1.47 AV: 100 NL: 1.79E7

T: FTMS + p ESI Full ms [150.00-2000.00]

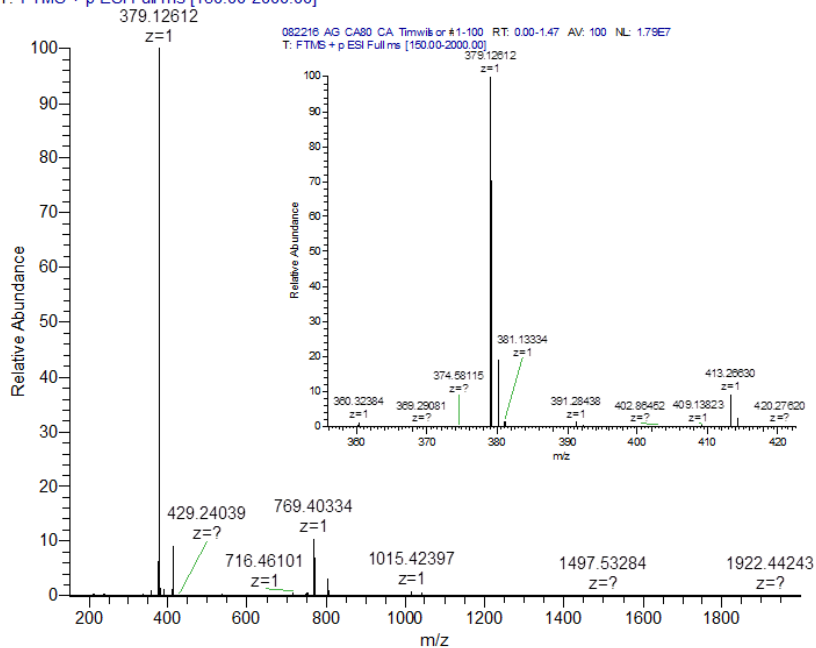

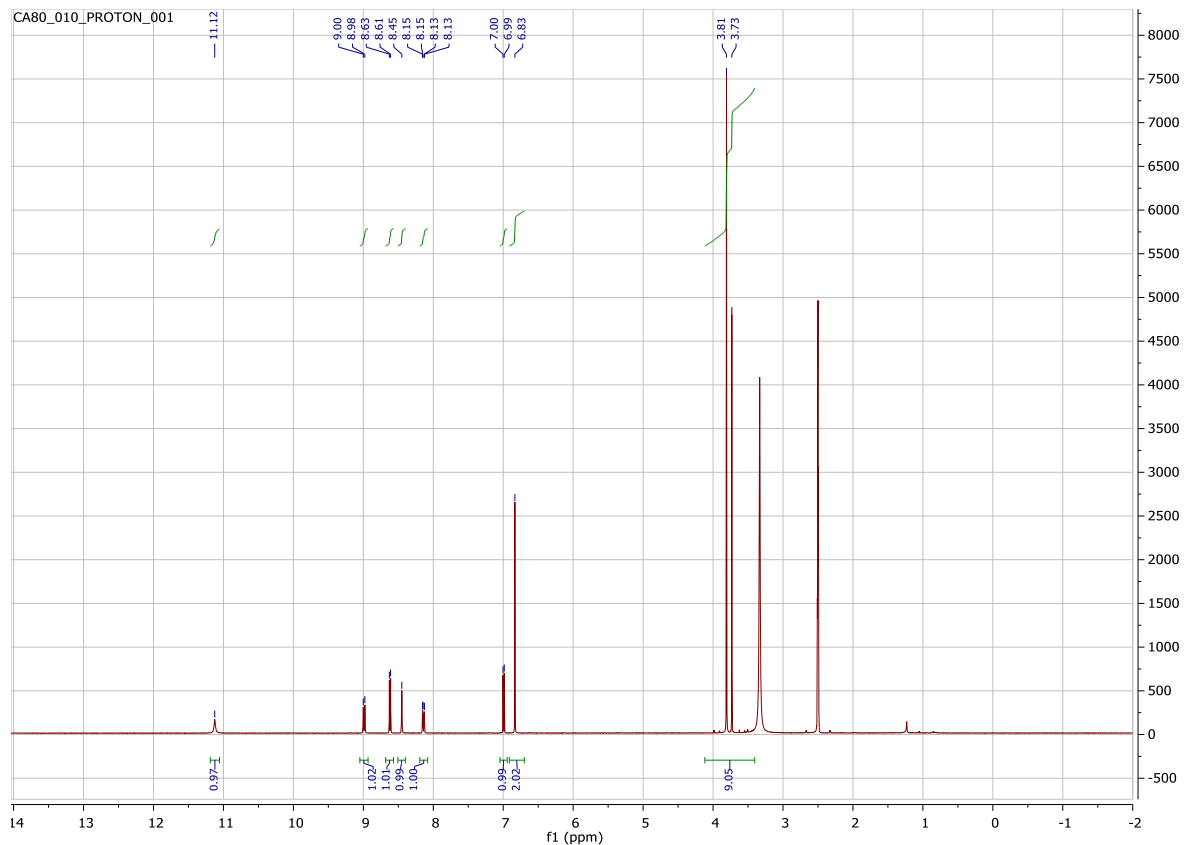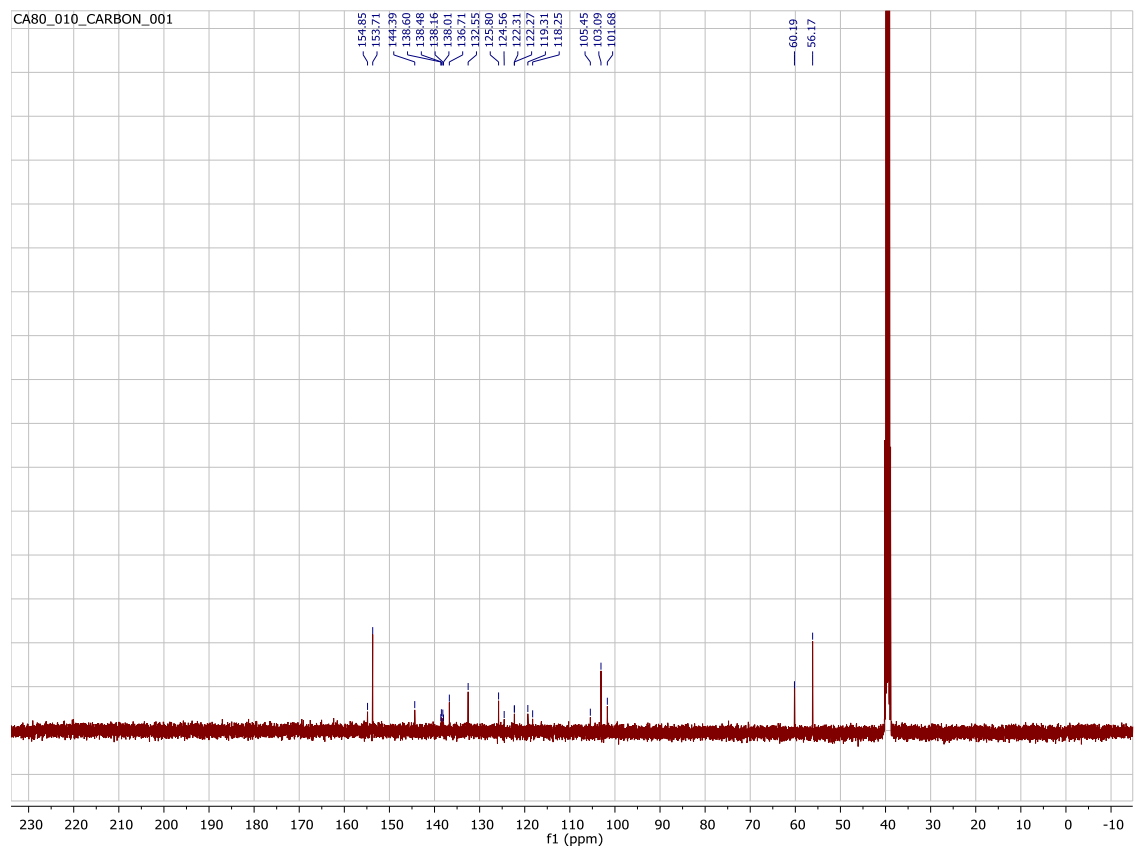

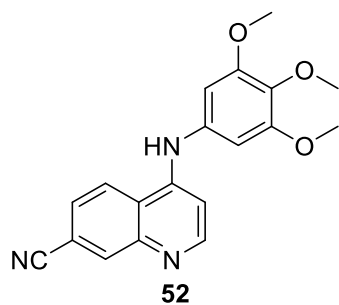

4-((3,4,5-Trimethoxyphenyl)amino)quinoline-7-carbonitrile (**52**)

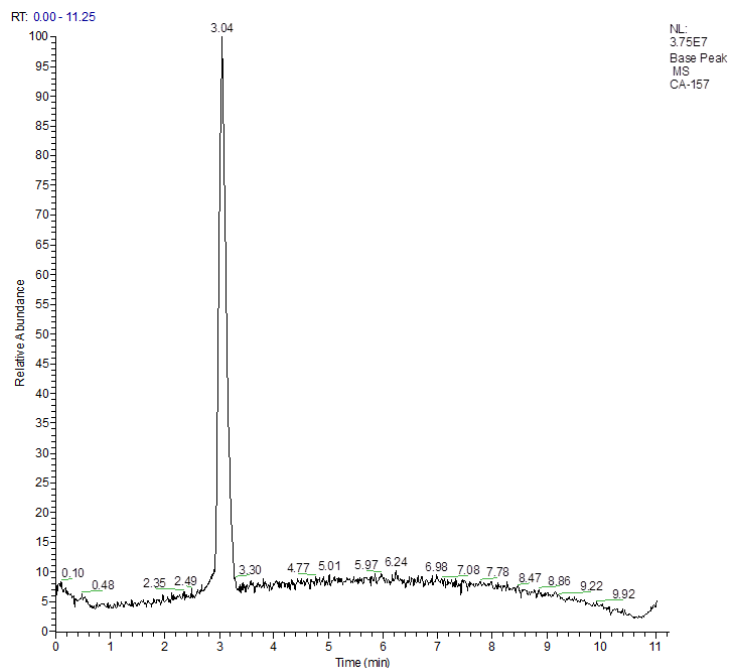

CA-157 #191-219 RT: 2.85-3.27 AV: 29 NL: 1.56E7  
T: FTMS → p-ESIFull.ms [100.00-2000.00]

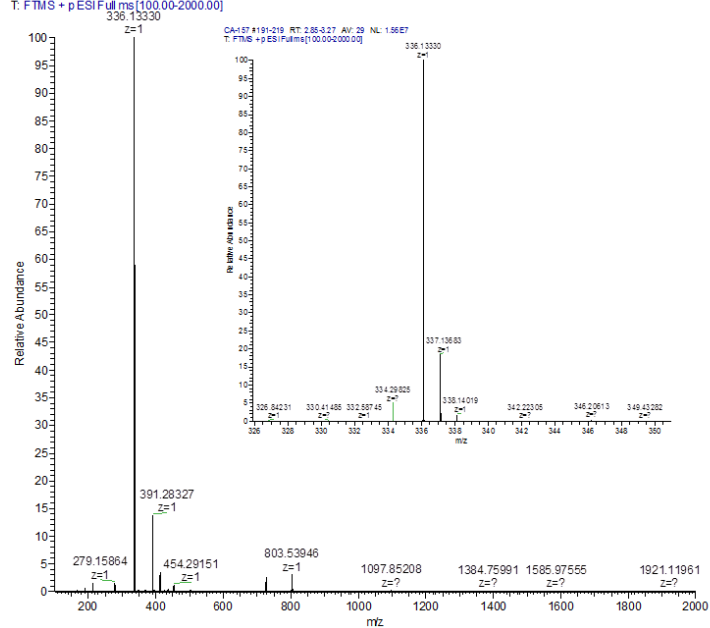

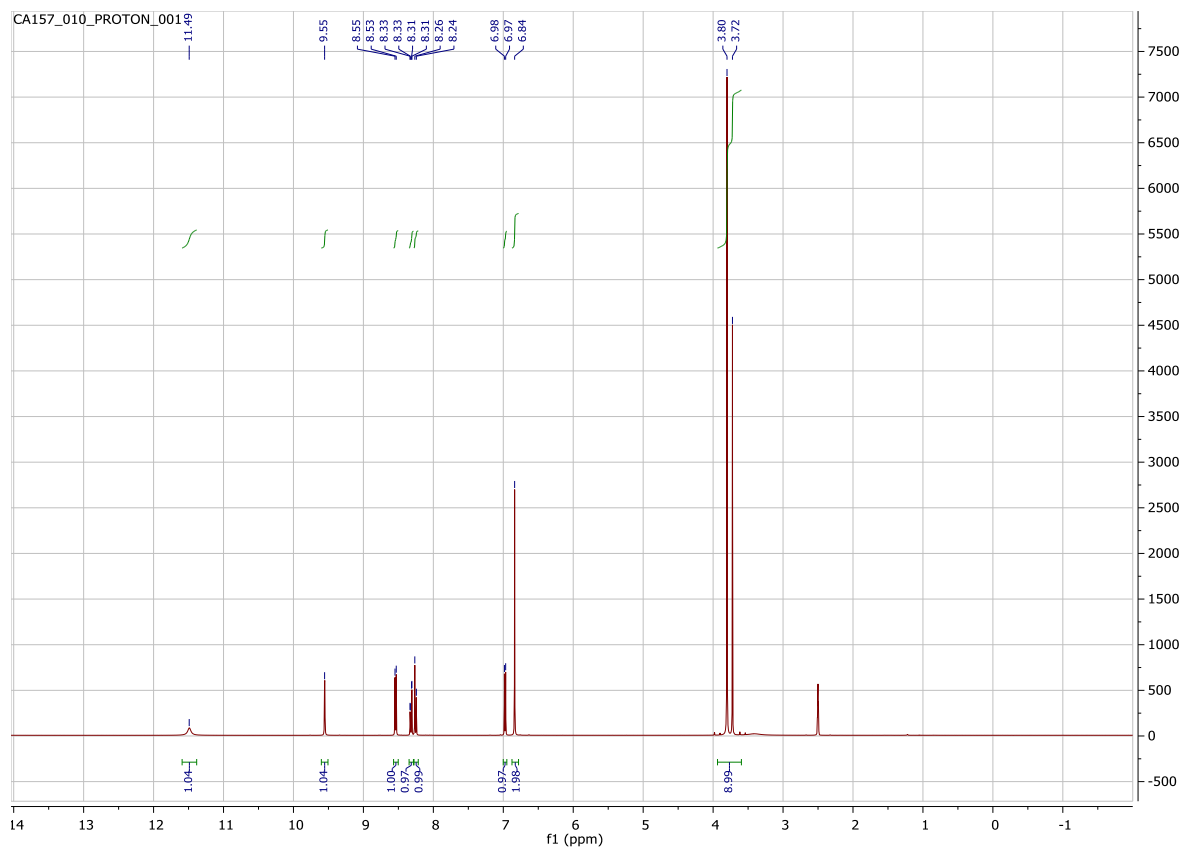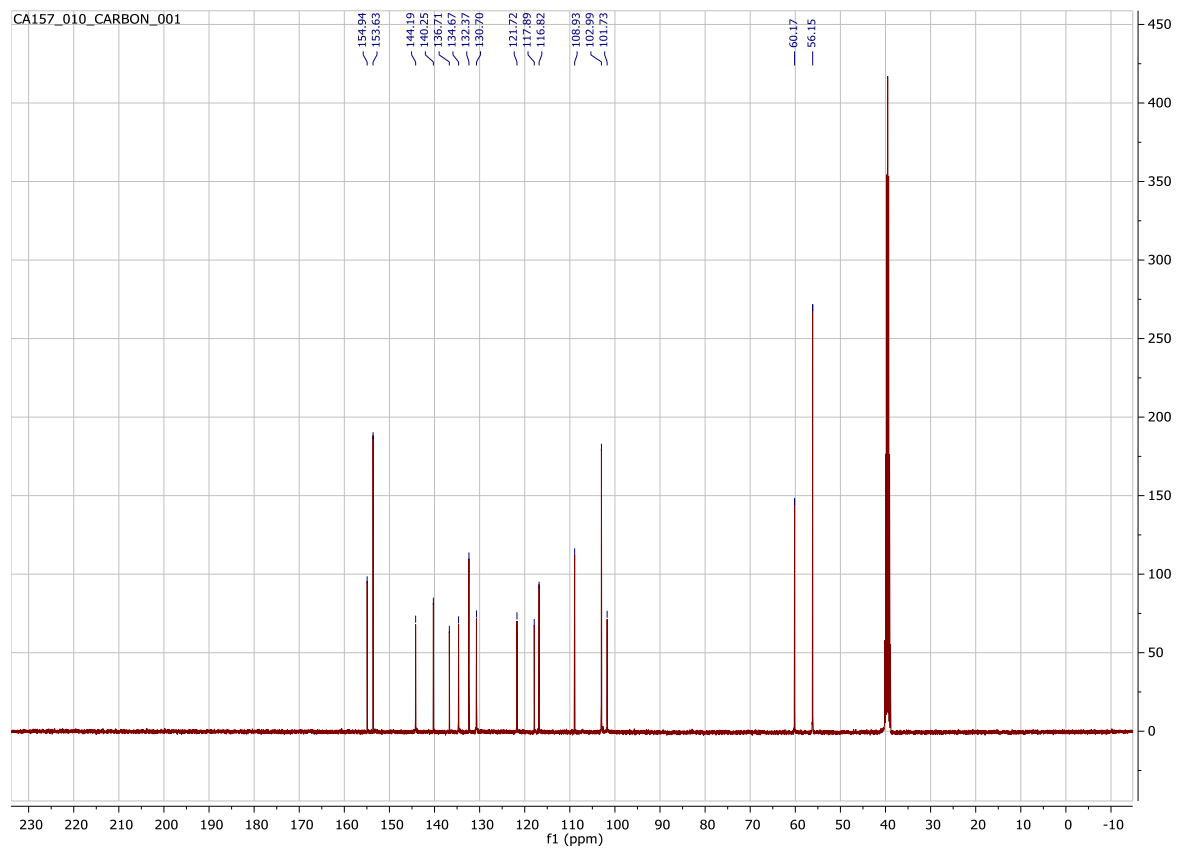

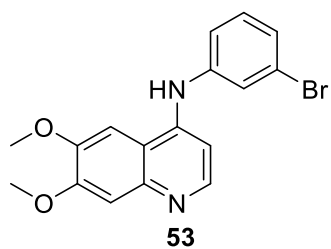

**N-(3-Bromophenyl)-6,7-dimethoxyquinolin-4-amine (53)**

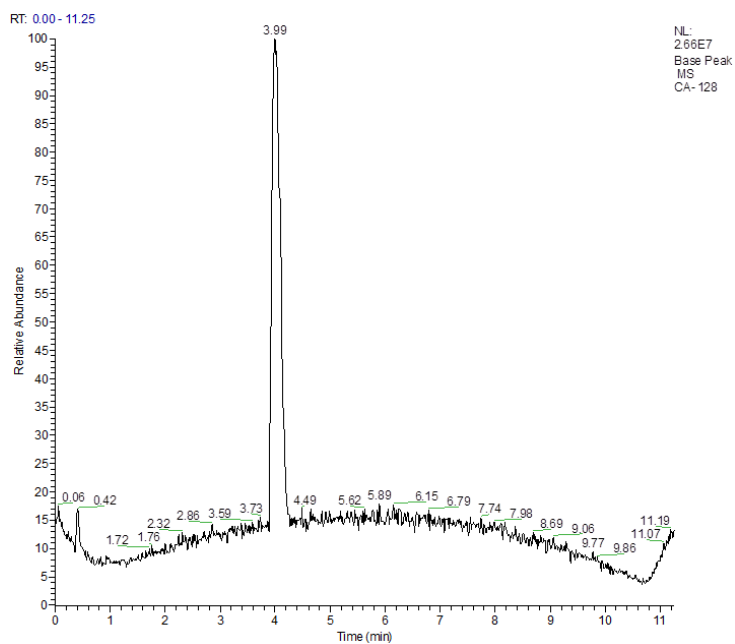

CA-128 #253-287 RT: 3.77-4.28 AV: 35 NL: 1.09E7  
T: FTMS + pESI Full ms [100.00-2000.00]

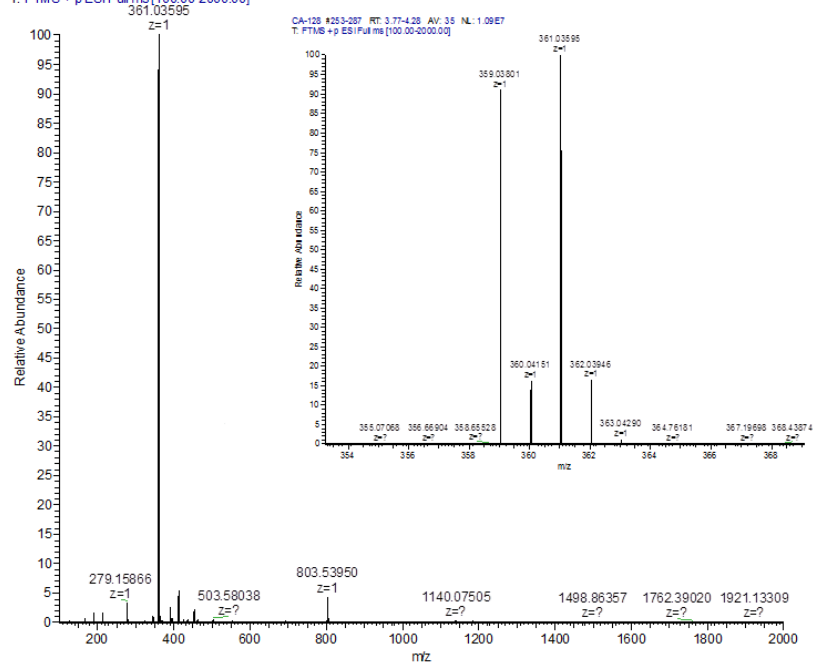

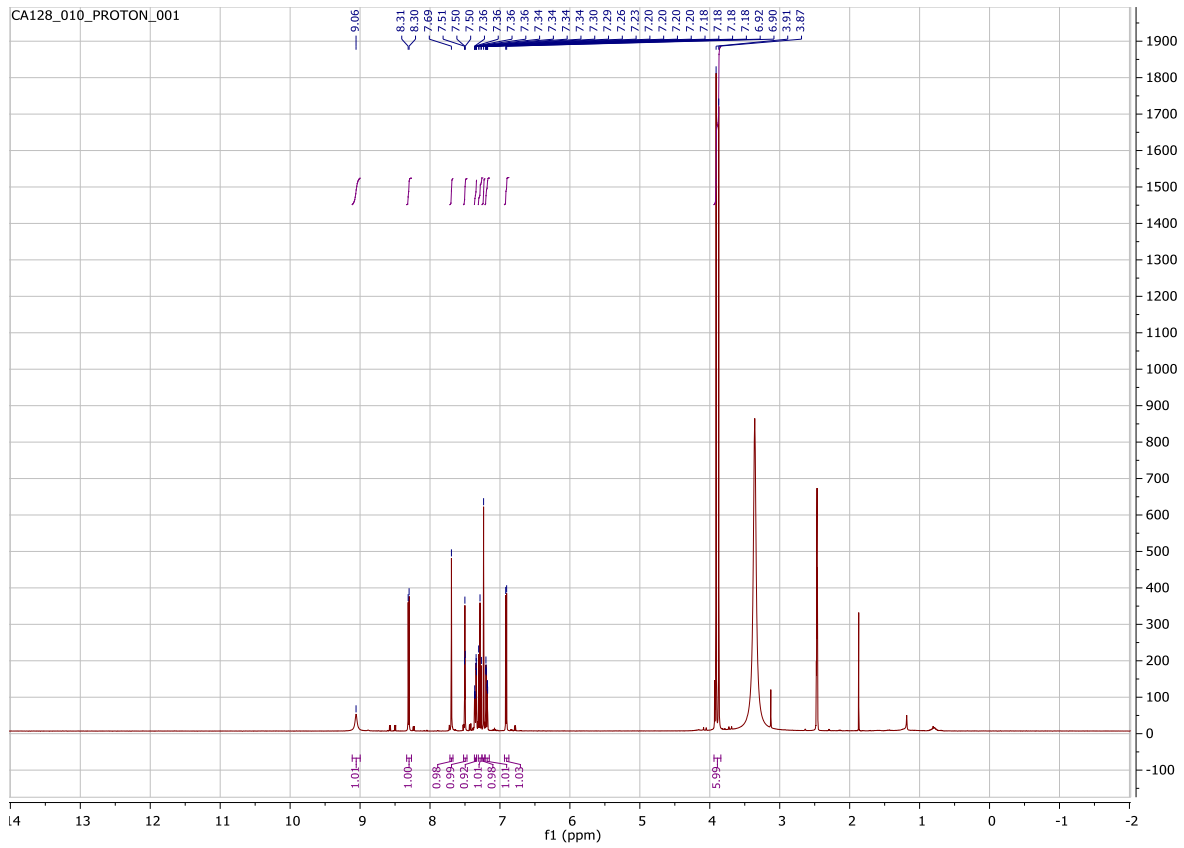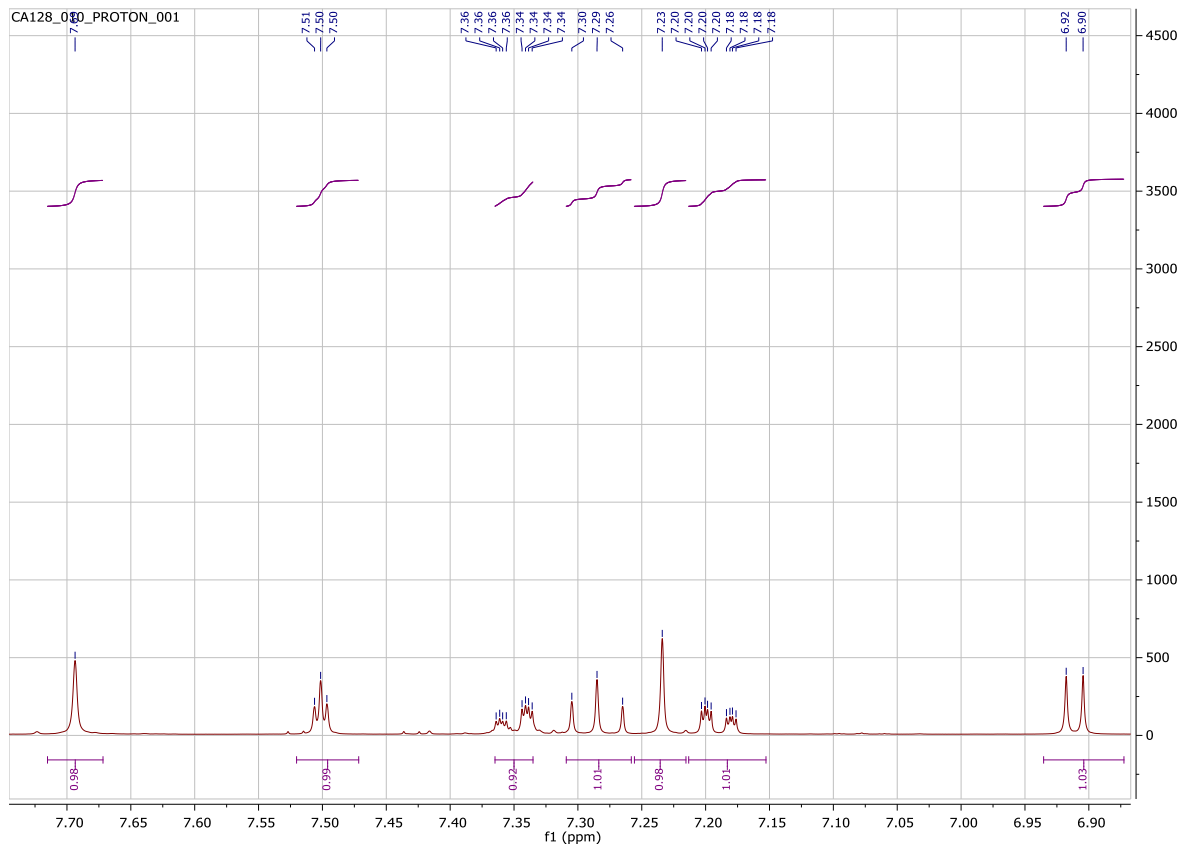

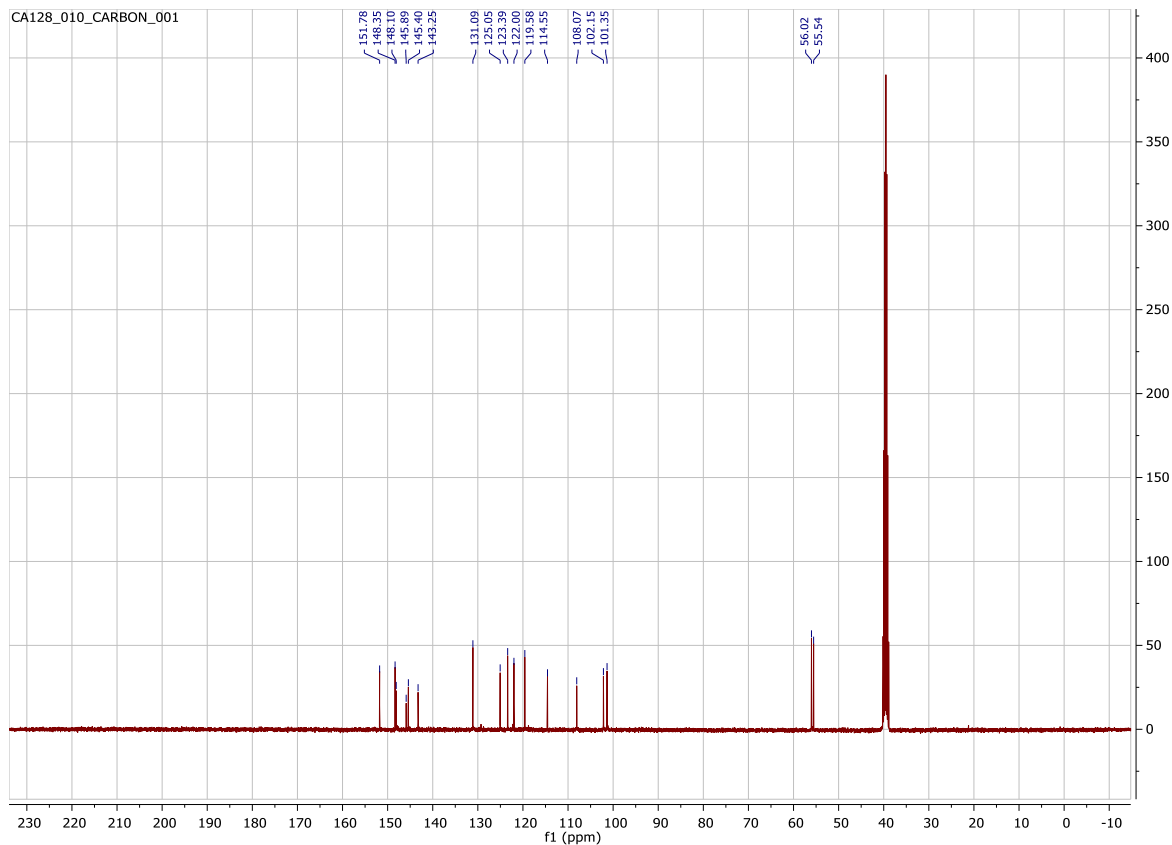



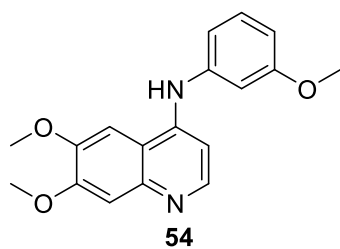

6,7-Dimethoxy-N-(3-methoxyphenyl)quinolin-4-amine (**54**)

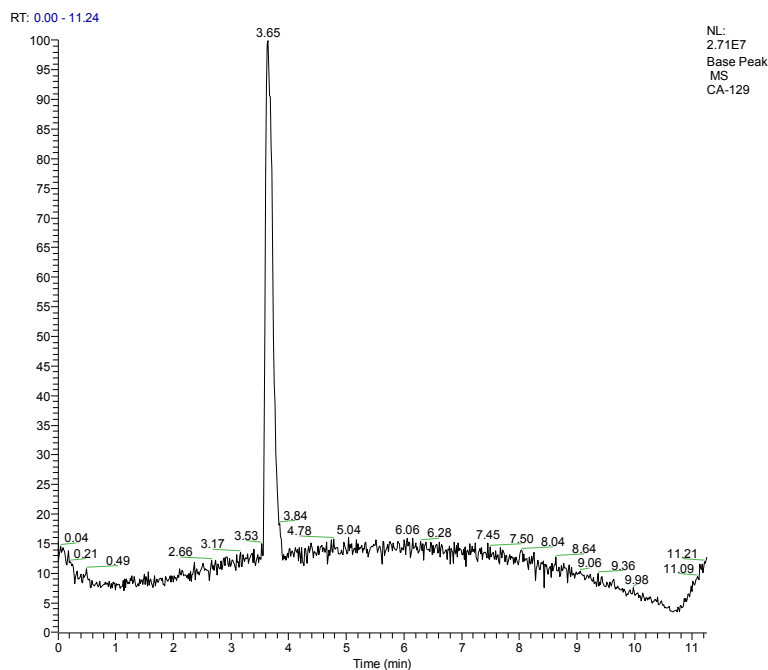

CA-129 #234-262 RT: 3.48-3.90 AV: 29 NL: 1.07E7  
T: FTMS + p ESI Full ms [100.00-2000.00]

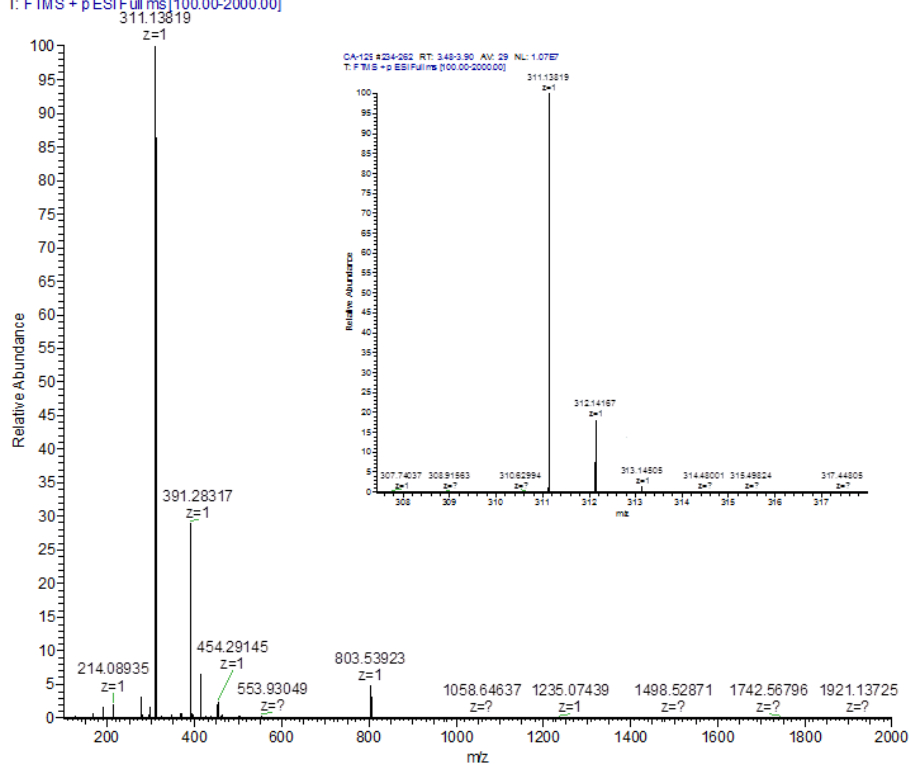

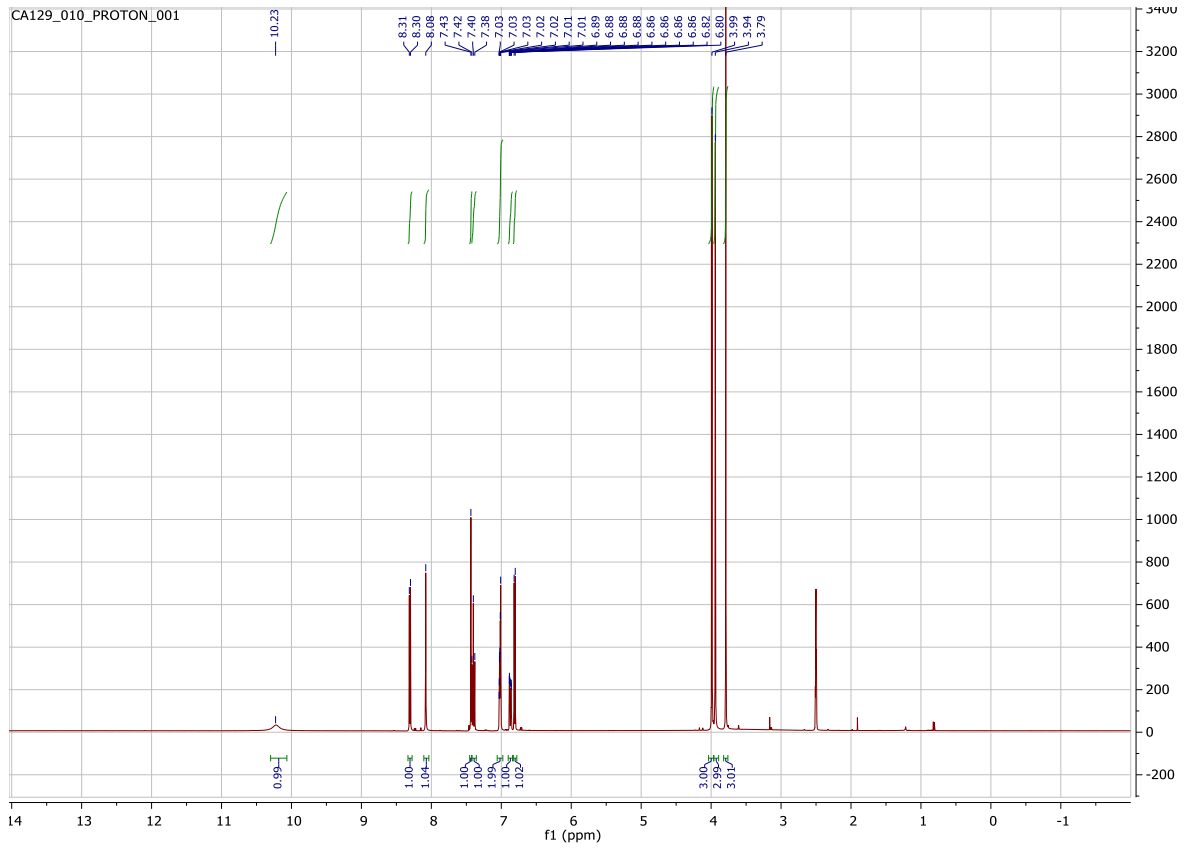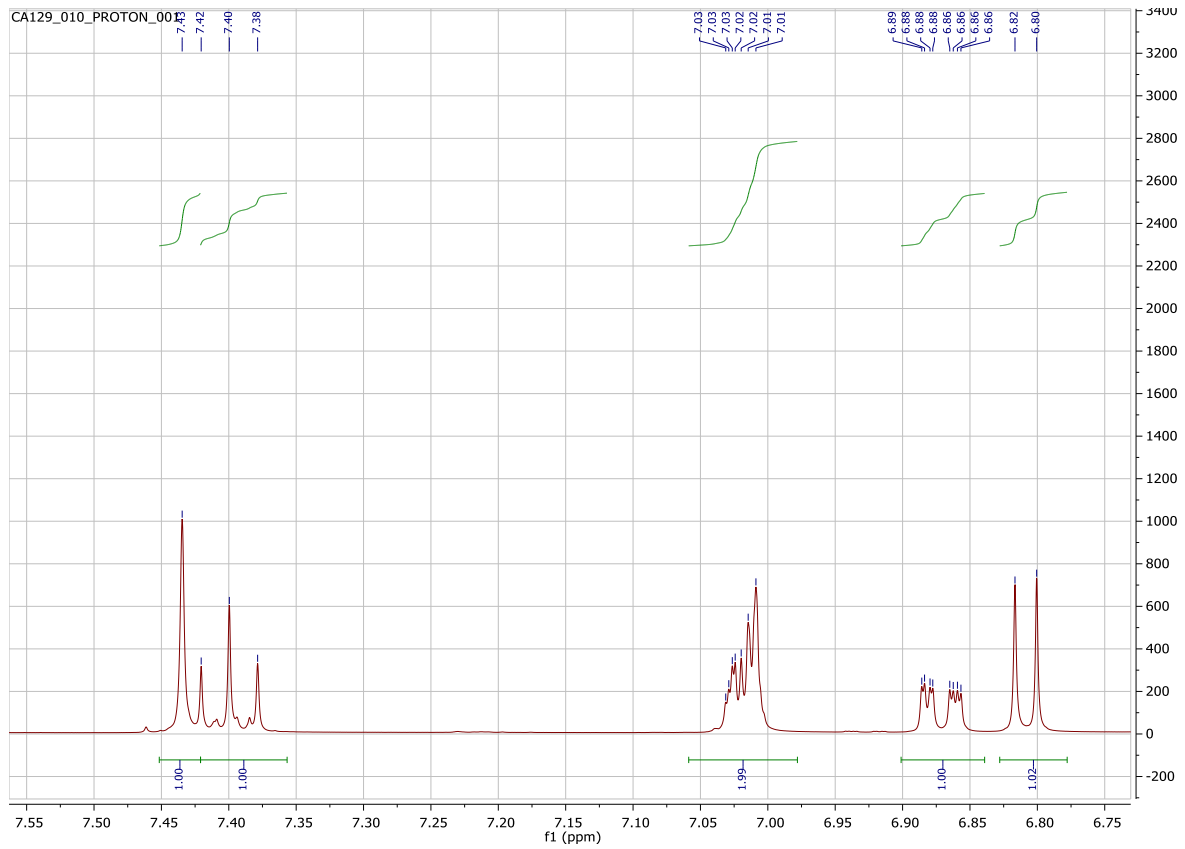

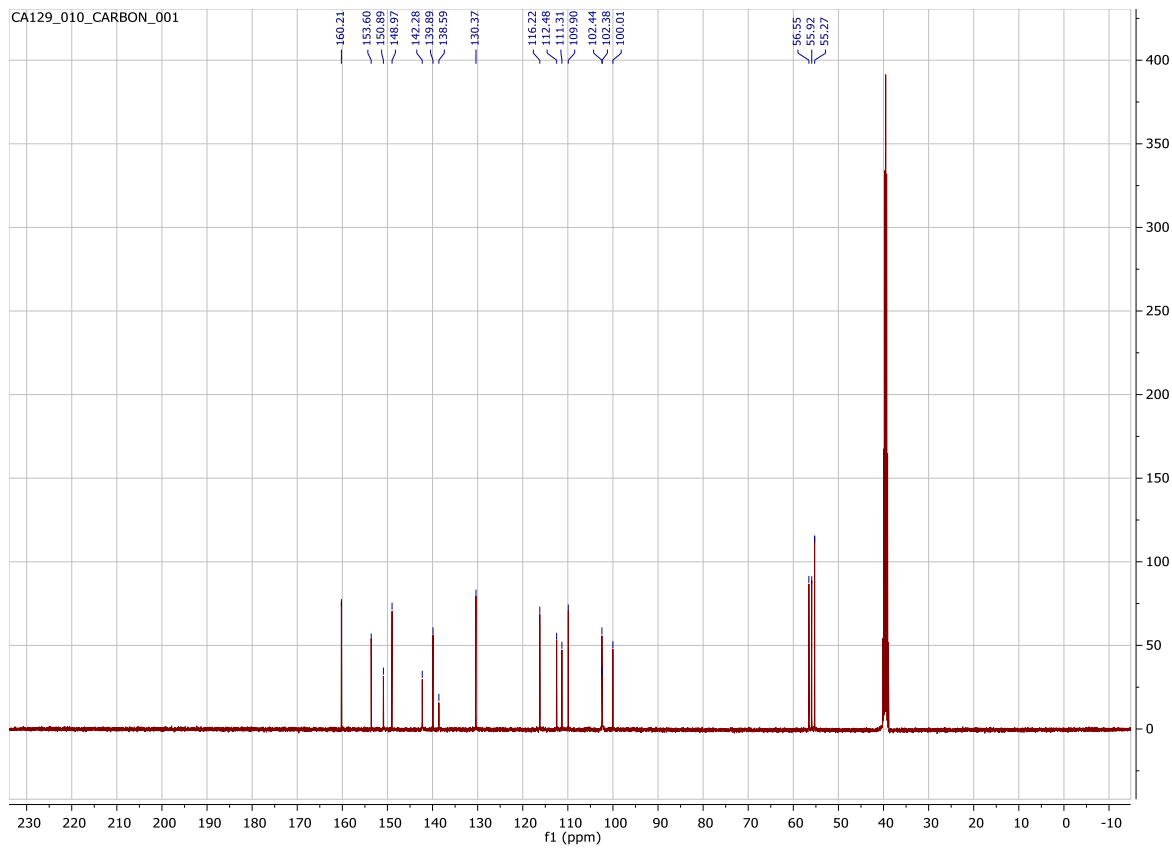

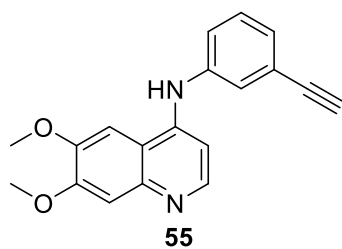

*N*-(3-Ethynylphenyl)-6,7-dimethoxyquinolin-4-amine (**55**)

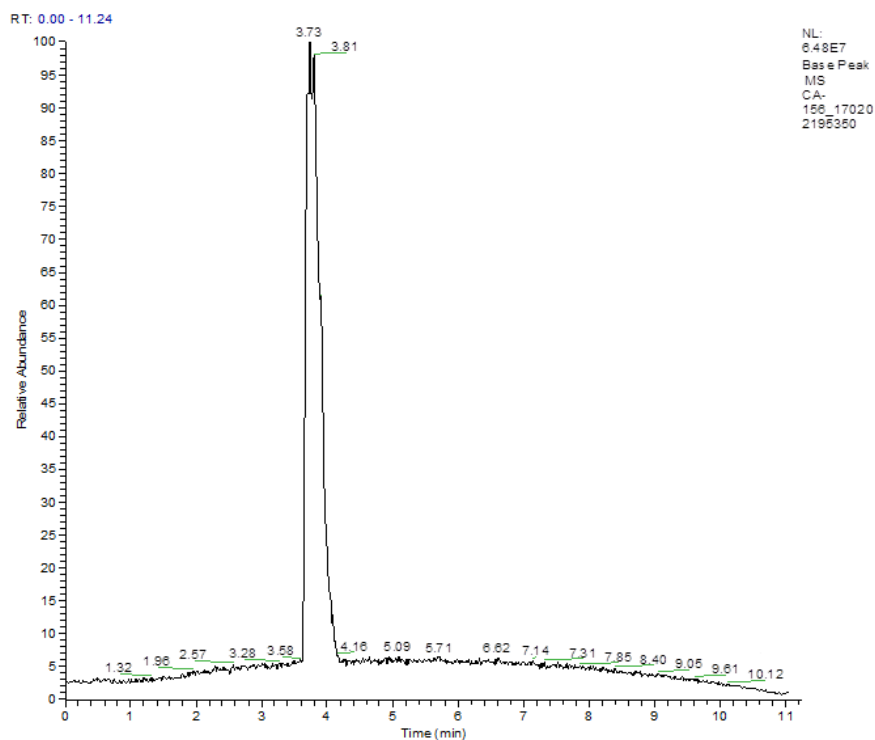

CA-156 170202195350 #238-274 RT: 3.57-4.10 AV: 37 NL: 3.10E7  
T: FTMS + pESI Full ms [100.00-2000.00]

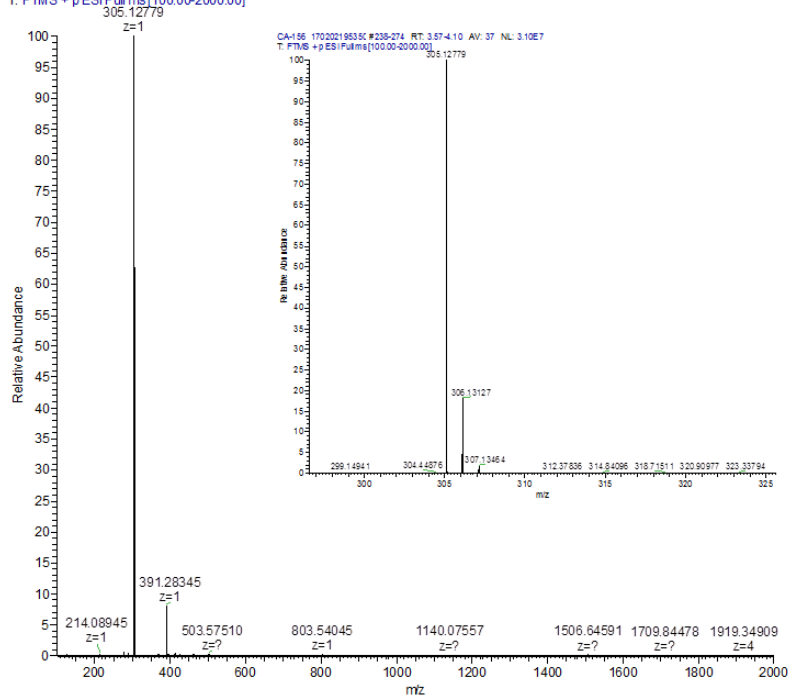

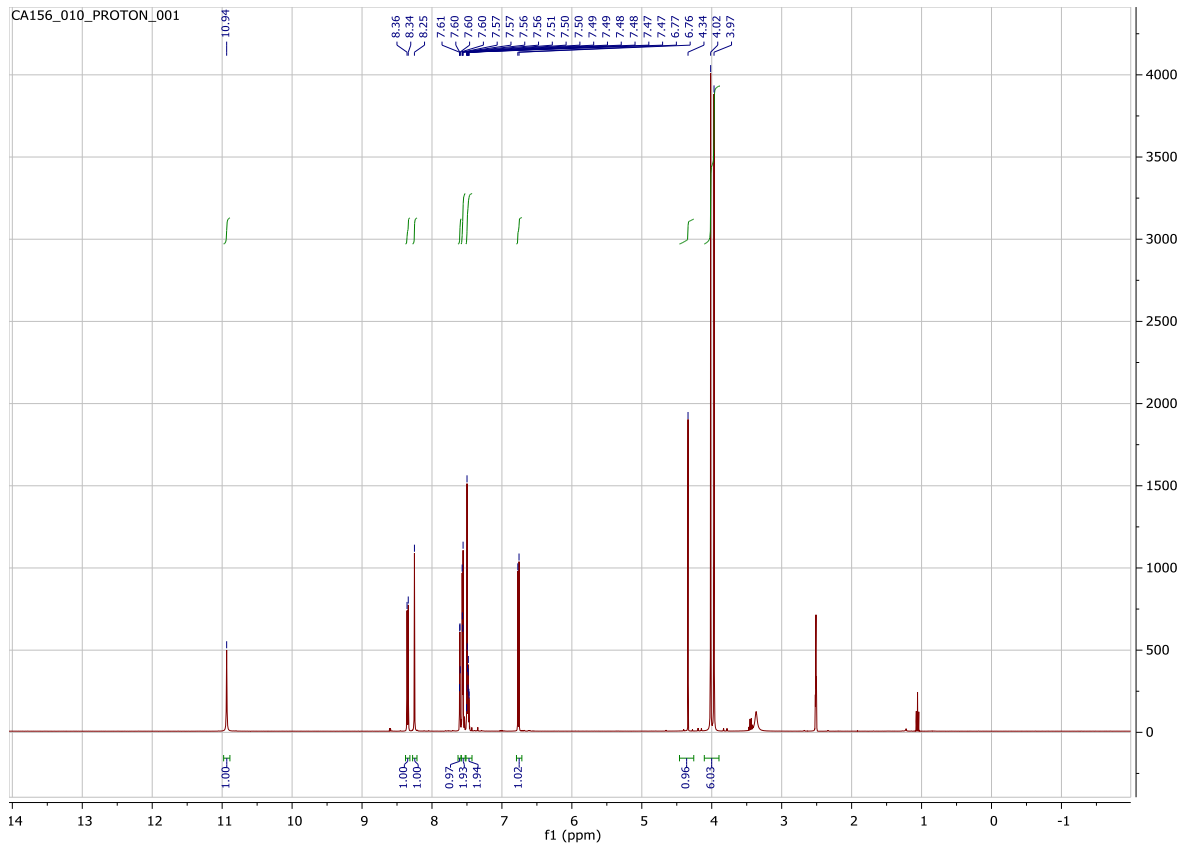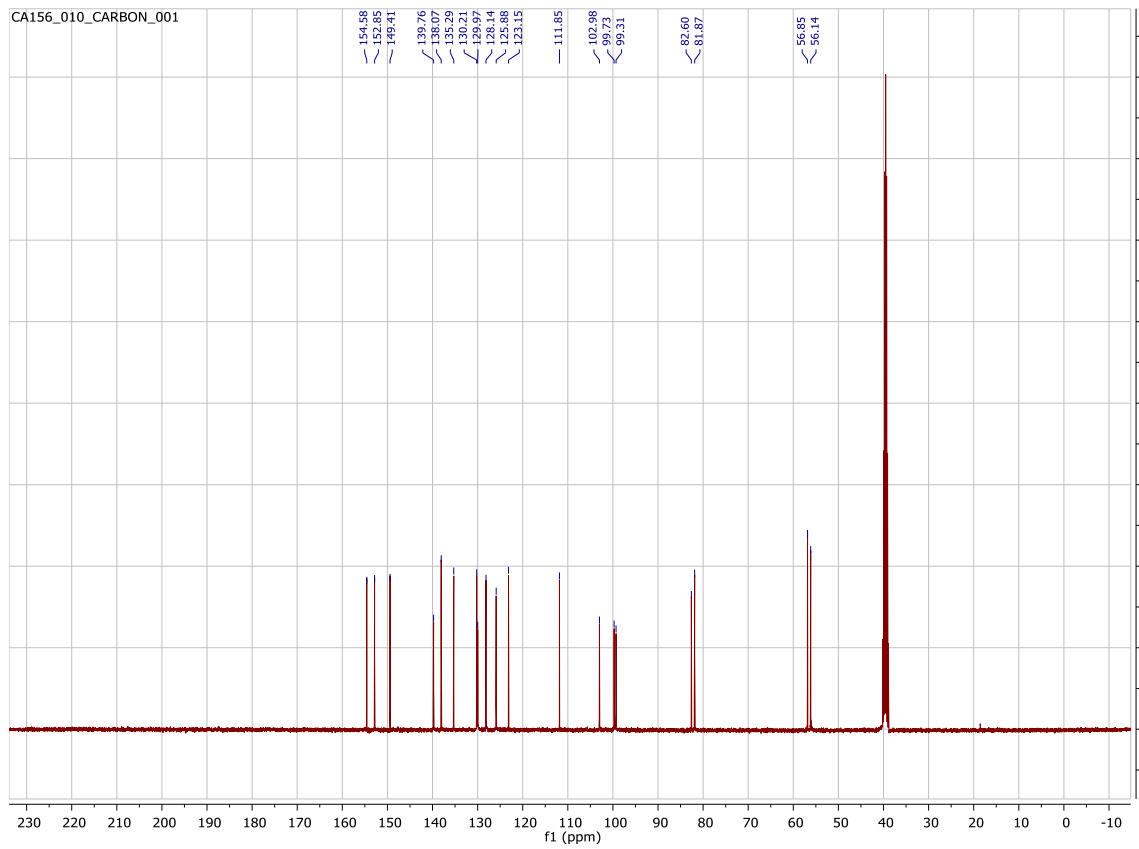

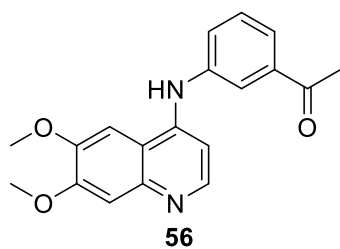

1-(3-((6,7-dimethoxyquinolin-4-yl)amino)phenyl)ethan-1-one (**56**)

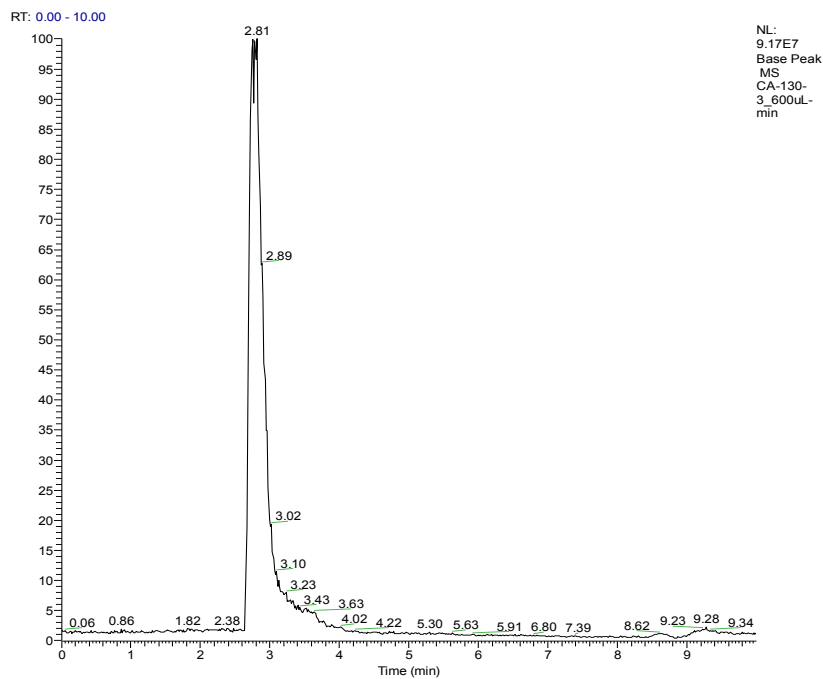

CA-130-3 600uL-min #169-212 RT: 2.60-3.25 AV: 44 NL: 3.47E7  
T: FTMS + pESI Full ms [100.00-2000.00]

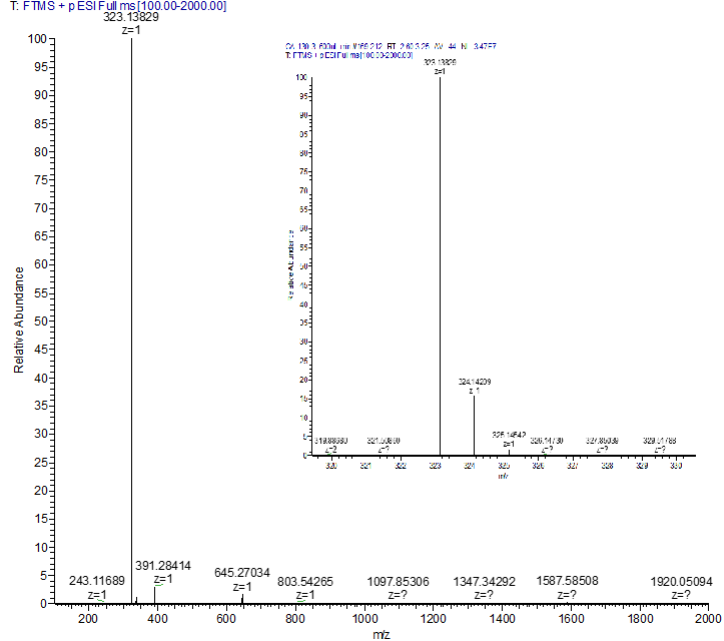

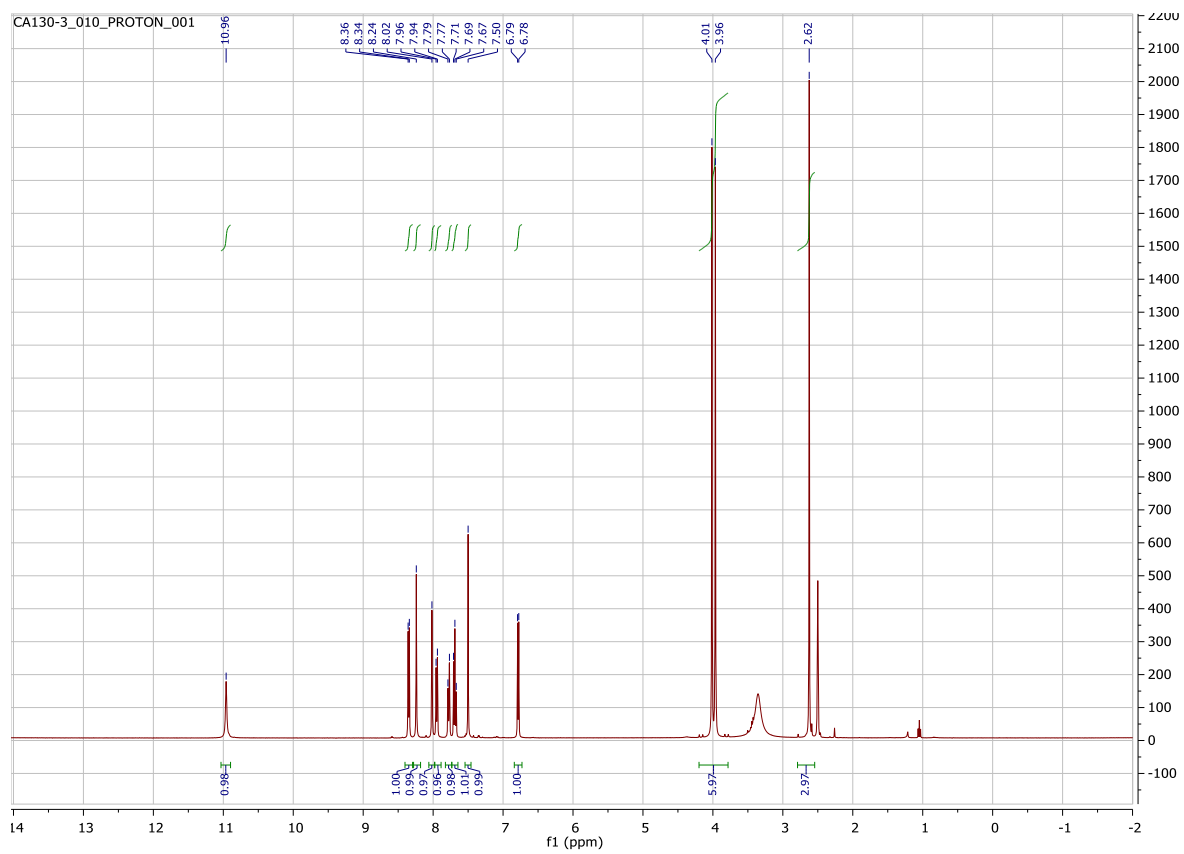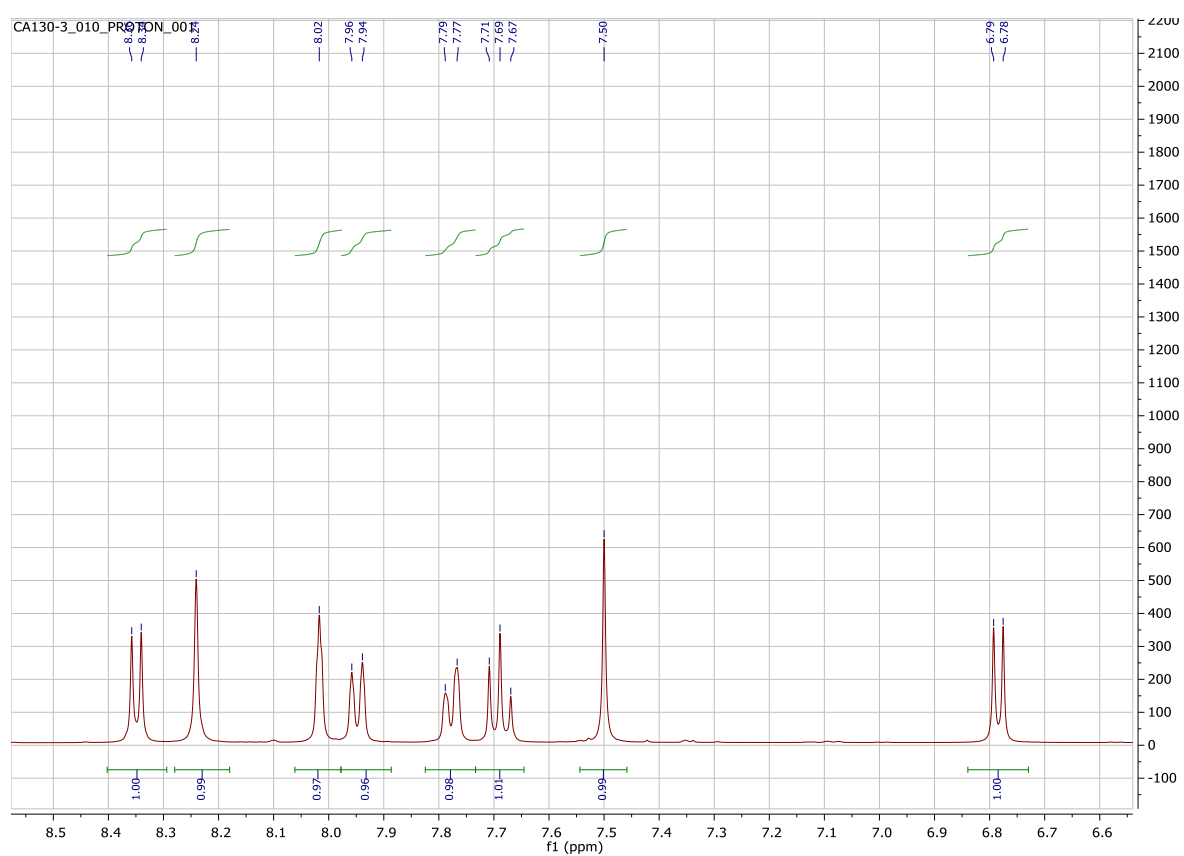

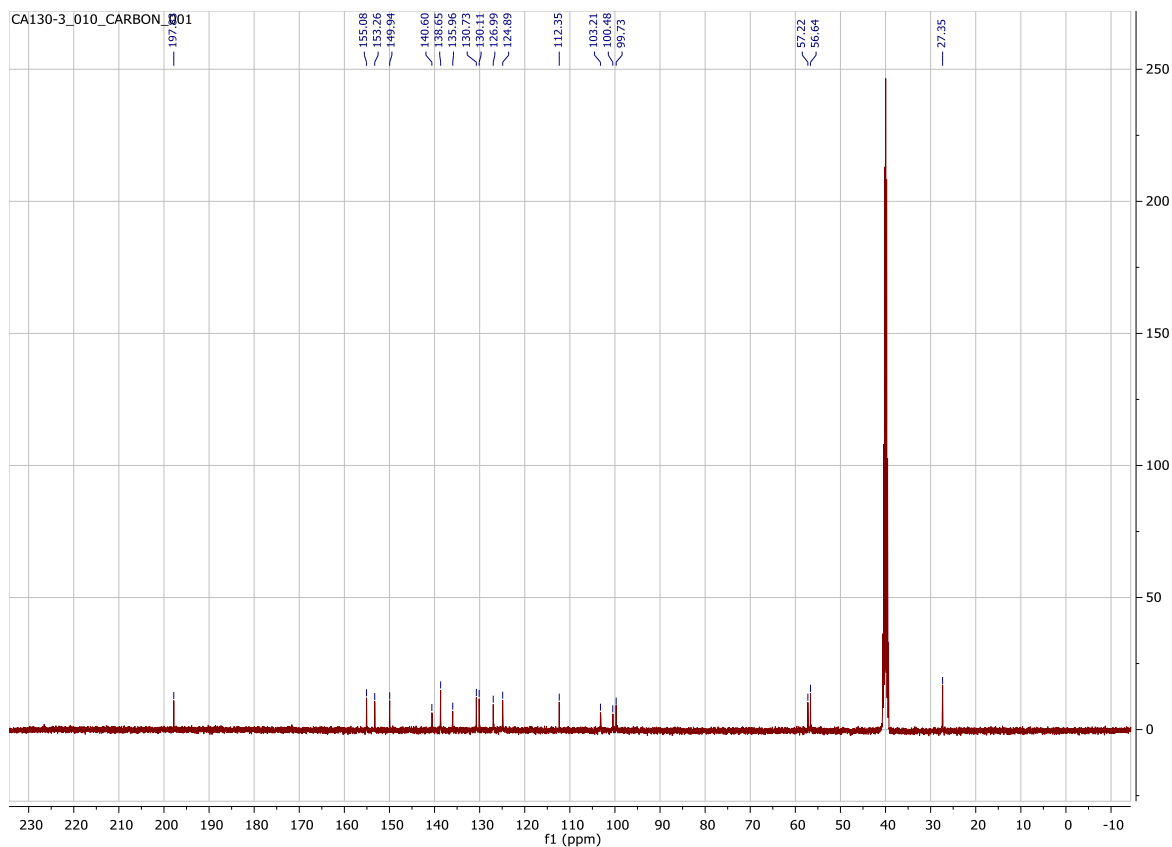



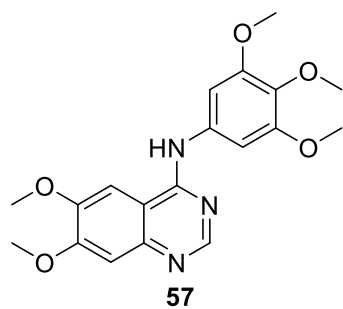

6,7-Dimethoxy-*N*-(3,4,5-trimethoxyphenyl)quinazolin-4-amine (**57**)

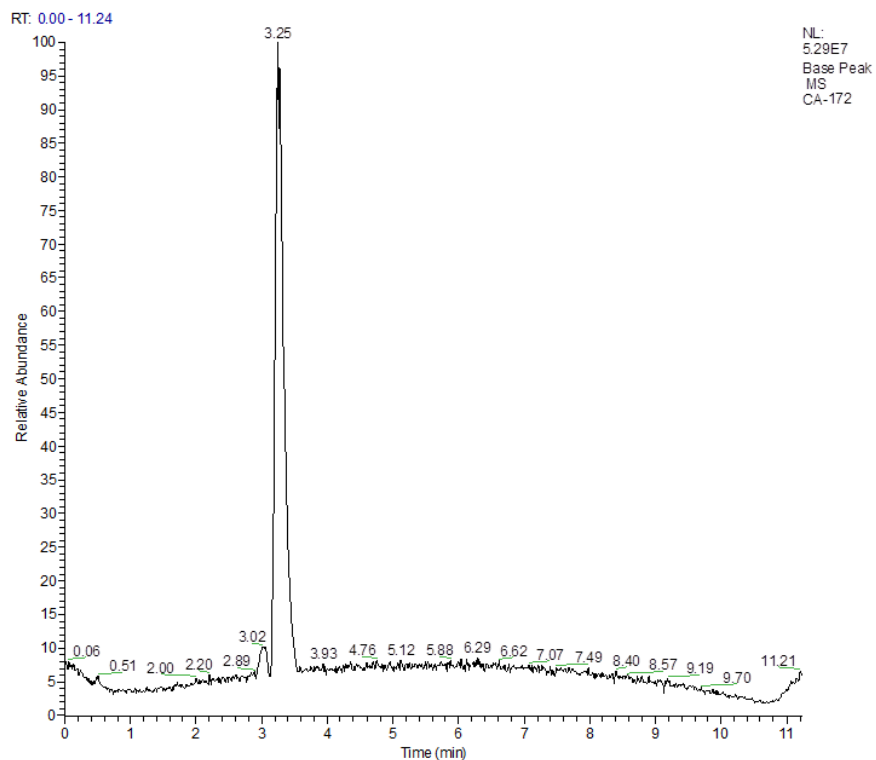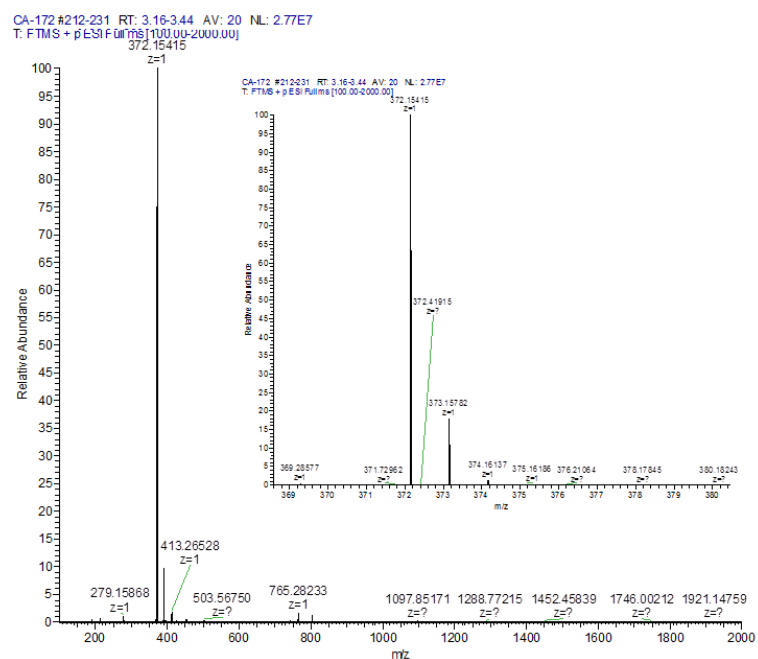

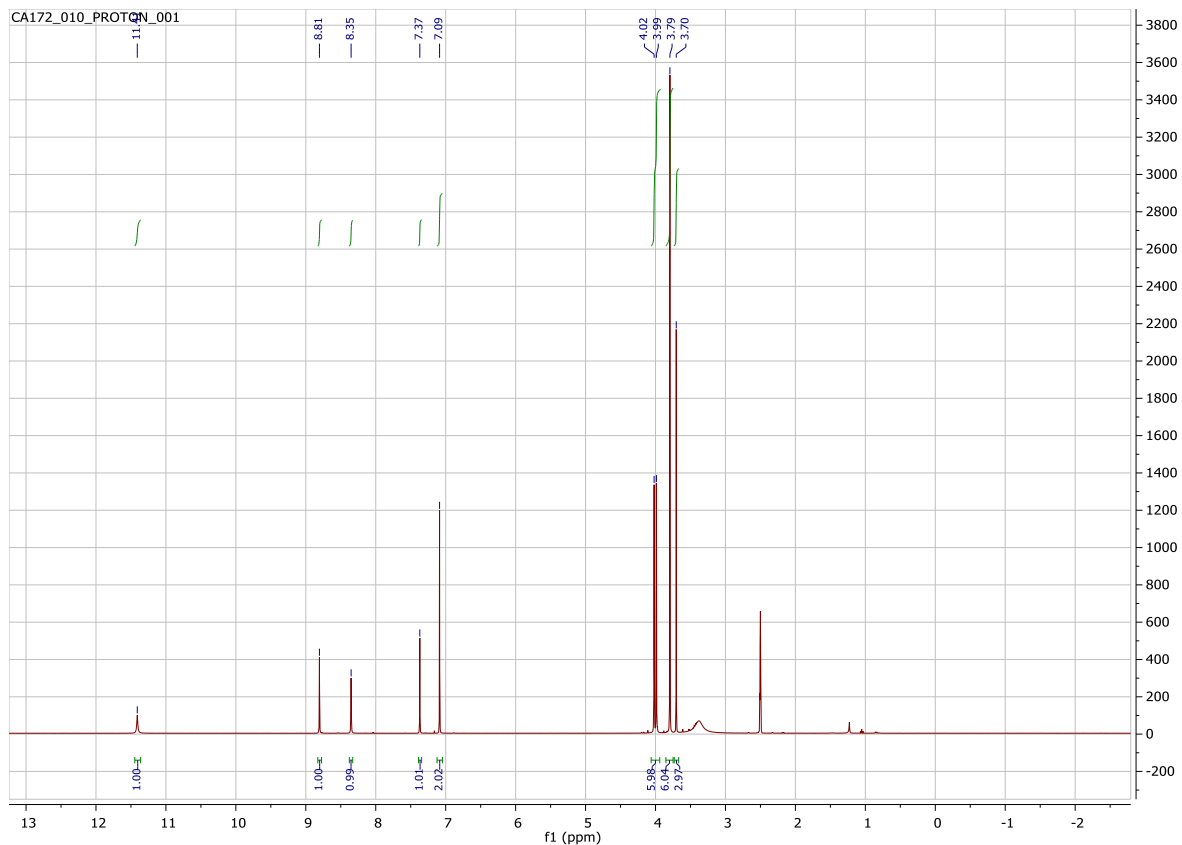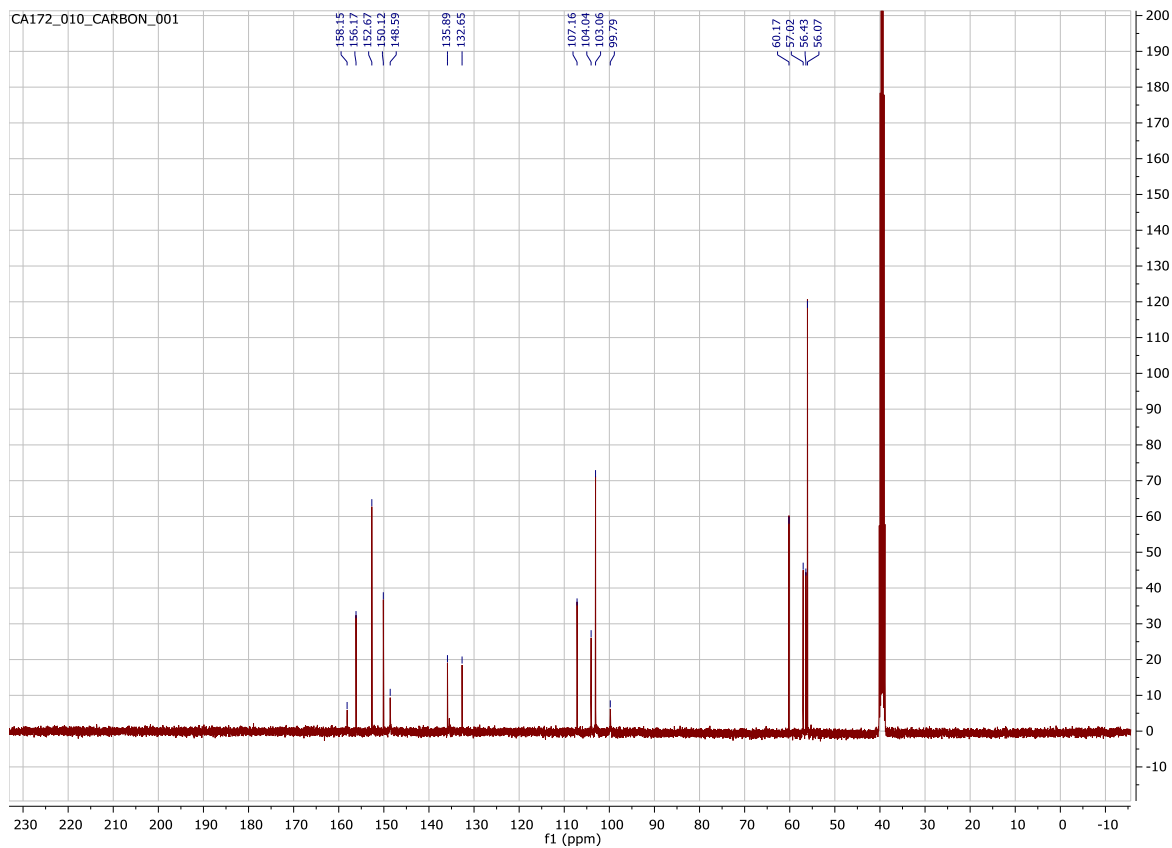

**Table S4 - Annotations, reference numbers and smiles**

| Paper | Lab-book | Annotation                                        | Smiles                                                                  |
|-------|----------|---------------------------------------------------|-------------------------------------------------------------------------|
| 1     | CA62     | 3,4,5-OMe                                         | <chem>COC(C=C1NC2=C3C(C=CC(C(F)(F)F)=C3)=NC=C2)=C(C(OC)=C1)OC</chem>    |
| 2     | -        | GW494610                                          | <chem>COC1=C(OC)C(OC)=CC(NC2=C3C(C=C(C4=CC=NC=C4)C=C3)=NC=C2)=C1</chem> |
| 3     | -        | GI230329                                          | <chem>BrC1=CC(NC2=C3C(C=C(OC)C(OC)=C3)=NC=N2)=CC=C1</chem>              |
| 4     | CA63     | 3,5-OMe                                           | <chem>COC1=CC(OC)=CC(NC2=C3C(C=CC(C(F)(F)F)=C3)=NC=C2)=C1</chem>        |
| 5     | CA64     | 3,4-OMe                                           | <chem>COC1=C(OC)C=CC(NC2=C3C(C=CC(C(F)(F)F)=C3)=NC=C2)=C1</chem>        |
| 6     | CA105    | 2,4-OMe                                           | <chem>COC(C=C1)=CC(OC)=C1NC2=C3C(C=CC(C(F)(F)F)=C3)=NC=C2</chem>        |
| 7     | CA106    | 2,5-OMe                                           | <chem>COC(C=CC(OC)=C1)=C1NC2=C3C(C=CC(C(F)(F)F)=C3)=NC=C2</chem>        |
| 8     | CA65     | 4-OMe                                             | <chem>FC(C1=CC2=C(NC3=CC=C(OC)C=C3)C=CN=C2C=C1)(F)F</chem>              |
| 9     | CA66     | 3-OMe                                             | <chem>FC(C1=CC2=C(NC3=CC(OC)=CC=C3)C=CN=C2C=C1)(F)F</chem>              |
| 10    | CA67     | 2-OMe                                             | <chem>FC(C1=CC2=C(NC3=C(OC)C=CC=C3)C=CN=C2C=C1)(F)F</chem>              |
| 11    | CA68     | 3,4-OCH <sub>2</sub> O-                           | <chem>FC(C1=CC2=C(NC3=CC=C(OCO4)C4=C3)C=CN=C2C=C1)(F)F</chem>           |
| 12    | CA69     | 3,4-OCH <sub>2</sub> CH <sub>2</sub> O-           | <chem>FC(C1=CC2=C(NC3=CC=C(OCCO4)C4=C3)C=CN=C2C=C1)(F)F</chem>          |
| 13    | CA72     | 3,4,5-OMe-Q                                       | <chem>FC(C1=CC2=C(NC3=CC(OC)=C(C(OC)=C3)OC)N=CN=C2C=C1)(F)F</chem>      |
| 14    | CA76     | 3,5-OMe-Q                                         | <chem>COC1=CC(OC)=CC(NC2=C3C(C=CC=C3)=NC=N2)=C1</chem>                  |
| 15    | CA78     | 4-OMe-Q                                           | <chem>COC(C=C1)=CC=C1NC2=C3C(C=CC(C(F)(F)F)=C3)=NC=N2</chem>            |
| 16    | CA83     | 3,4,5-F                                           | <chem>FC1=C(F)C(F)=CC(NC2=C3C(C=CC(C(F)(F)F)=C3)=NC=C2)=C1</chem>       |
| 17    | CA84     | 3,5-F                                             | <chem>FC1=CC(F)=CC(NC2=C3C(C=CC(C(F)(F)F)=C3)=NC=C2)=C1</chem>          |
| 18    | CA86     | 4-F                                               | <chem>FC(C=C1)=CC=C1NC2=C3C(C=CC(C(F)(F)F)=C3)=NC=C2</chem>             |
| 19    | CA87     | 3-F                                               | <chem>FC1=CC=CC(NC2=C3C(C=CC(C(F)(F)F)=C3)=NC=C2)=C1</chem>             |
| 20    | CA88     | 2-F                                               | <chem>FC(C=CC=C1)=C1NC2=C3C(C=CC(C(F)(F)F)=C3)=NC=C2</chem>             |
| 21    | CA116    | 3-F, 4-Cl                                         | <chem>ClC(C=C1)=C(F)C=C1NC2=C3C(C=CC(C(F)(F)F)=C3)=NC=C2</chem>         |
| 22    | CA118    | 3-F, 5-Cl                                         | <chem>ClC1=CC(F)=CC(NC2=C3C(C=CC(C(F)(F)F)=C3)=NC=C2)=C1</chem>         |
| 23    | CA107    | 3,4-Cl                                            | <chem>ClC(C=C1)=C(Cl)C=C1NC2=C3C(C=CC(C(F)(F)F)=C3)=NC=C2</chem>        |
| 24    | CA101    | 4-Cl                                              | <chem>ClC(C=C1)=CC=C1NC2=C3C(C=CC(C(F)(F)F)=C3)=NC=C2</chem>            |
| 25    | CA120    | 3-Cl                                              | <chem>ClC1=CC=CC(NC2=C3C(C=CC(C(F)(F)F)=C3)=NC=C2)=C1</chem>            |
| 26    | CA121    | 2-Cl                                              | <chem>ClC(C=CC=C1)=C1NC2=C3C(C=CC(C(F)(F)F)=C3)=NC=C2</chem>            |
| 27    | CA110    | 4-Br                                              | <chem>BrC(C=C1)=CC=C1NC2=C3C(C=CC(C(F)(F)F)=C3)=NC=C2</chem>            |
| 28    | CA98     | 3-Br                                              | <chem>BrC1=CC=CC(NC2=C3C(C=CC(C(F)(F)F)=C3)=NC=C2)=C1</chem>            |
| 29    | CA111    | 2-Br                                              | <chem>BrC(C=CC=C1)=C1NC2=C3C(C=CC(C(F)(F)F)=C3)=NC=C2</chem>            |
| 30    | CA113    | 3-I                                               | <chem>IC1=CC=CC(NC2=C3C(C=CC(C(F)(F)F)=C3)=NC=C2)=C1</chem>             |
| 31    | CA89     | 4-CN                                              | <chem>FC(C1=CC2=C(NC3=CC=C(C#N)C=C3)C=CN=C2C=C1)(F)F</chem>             |
| 32    | CA90     | 3-CN                                              | <chem>FC(C1=CC2=C(NC3=CC(C#N)=CC=C3)C=CN=C2C=C1)(F)F</chem>             |
| 33    | CA91     | 2-CN                                              | <chem>FC(C1=CC2=C(NC3=C(C#N)C=CC=C3)C=CN=C2C=C1)(F)F</chem>             |
| 34    | CA112    | 3-CF <sub>3</sub>                                 | <chem>FC(C1=CC=CC(NC2=C3C(C=CC(C(F)(F)F)=C3)=NC=C2)=C1)(F)F</chem>      |
| 35    | CA115    | 3-C≡C                                             | <chem>C#CC1=CC=CC(NC2=C3C(C=CC(C(F)(F)F)=C3)=NC=C2)=C1</chem>           |
| 36    | CA114    | 3-Ac                                              | <chem>CC(C1=CC=CC(NC2=C3C(C=CC(C(F)(F)F)=C3)=NC=C2)=C1)=O</chem>        |
| 37    | CA103    | 3-SO <sub>2</sub> Me                              | <chem>O=S(C1=CC=CC(NC2=C3C(C=CC(C(F)(F)F)=C3)=NC=C2)=C1)(C)=O</chem>    |
| 38    | CA85     | 4-SO <sub>2</sub> Me                              | <chem>O=S(C(C=C1)=CC=C1NC2=C3C(C=CC(C(F)(F)F)=C3)=NC=C2)(C)=O</chem>    |
| 39    | CA102    | 4-O <sup>t</sup> Bu                               | <chem>CC(C)(C)OC(C=C1)=CC=C1NC2=C3C(C=CC(C(F)(F)F)=C3)=NC=C2</chem>     |
| 40    | CA70     | 4-CH <sub>2</sub> SO <sub>2</sub> CH <sub>3</sub> | <chem>O=S(CC(C=C1)=CC=C1NC2=C3C(C=CC(C(F)(F)F)=C3)=NC=C2)(C)=O</chem>   |

|    |       |                      |                                                           |
|----|-------|----------------------|-----------------------------------------------------------|
| 41 | CA73  | 6-H                  | COC(C=C1NC2=C3C(C=CC=C3)=NC=C2)=C(C(OC)=C1)OC             |
| 42 | CA82  | 6-F                  | COC(C=C1NC2=C3C(C=CC(F)=C3)=NC=C2)=C(C(OC)=C1)OC          |
| 43 | CA163 | 7-F                  | COC1=C(OC)C(OC)=CC(NC2=C3C(C=C(F)C=C3)=NC=C2)=C1          |
| 44 | CA99  | 5,7-F                | COC(C=C1NC2=C3C(C=C(F)C=C3F)=NC=C2)=C(C(OC)=C1)OC         |
| 45 | CA100 | 6- <sup>t</sup> Bu   | COC(C=C1NC2=C3C(C=CC(C(C)(C)C)=C3)=NC=C2)=C(C(OC)=C1)OC   |
| 46 | CA171 | 6-CN                 | COC1=C(OC)C(OC)=CC(NC2=C3C(C=CC(C#N)=C3)=NC=C2)=C1        |
| 47 | CA170 | 6-SO <sub>2</sub> Me | COC1=C(OC)C(OC)=CC(NC2=C3C(C=CC(S(=O)(C)=O)=C3)=NC=C2)=C1 |
| 48 | CA81  | 6-OMe                | COC1=C(OC)C(OC)=CC(NC2=C3C(C=CC(OC)=C3)=NC=C2)=C1         |
| 49 | CA75  | 6,7-OMe              | COC(C=C1NC2=C3C(C=C(OC)C(OC)=C3)=NC=C2)=C(C(OC)=C1)OC     |
| 50 | CA162 | 7-OMe                | COC1=C(OC)C(OC)=CC(NC2=C3C(C=C(OC)C=C3)=NC=C2)=C1         |
| 51 | CA80  | 7-CF <sub>3</sub>    | COC(C=C1NC2=C3C(C=C(C(F)(F)F)C=C3)=NC=C2)=C(C(OC)=C1)OC   |
| 52 | CA157 | 7-CN                 | COC1=C(OC)C(OC)=CC(NC2=C3C(C=C(C#N)C=C3)=NC=C2)=C1        |
| 53 | CA128 | 3-Br                 | BrC1=CC=CC(NC2=C3C(C=C(OC)C(OC)=C3)=NC=C2)=C1             |
| 54 | CA129 | 3-OMe                | COC1=CC=CC(NC2=C3C(C=C(OC)C(OC)=C3)=NC=C2)=C1             |
| 55 | CA156 | 3-C≡C                | COC1=CC2=C(NC3=CC(C#C)=CC=C3)C=CN=C2C=C1OC                |
| 56 | CA130 | 3-Ac                 | COC1=CC2=C(NC3=CC(C(C)=O)=CC=C3)C=CN=C2C=C1OC             |
| 57 | CA172 | 3,4,5-OMe-Q          | COC1=C(OC)C(OC)=CC(NC2=C3C(C=C(OC)C(OC)=C3)=NC=N2)=C1     |

Figure S10 -  $K_i$  curves for GAK – previously identified

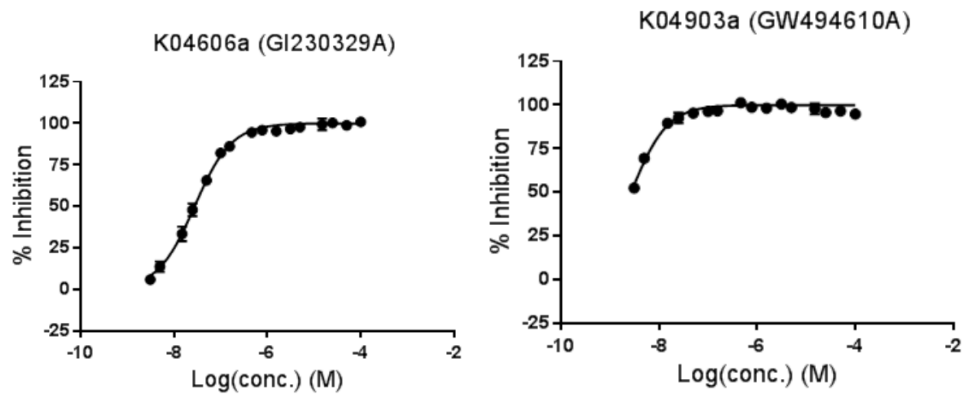

Figure S11 -  $K_i$  curves for GAK

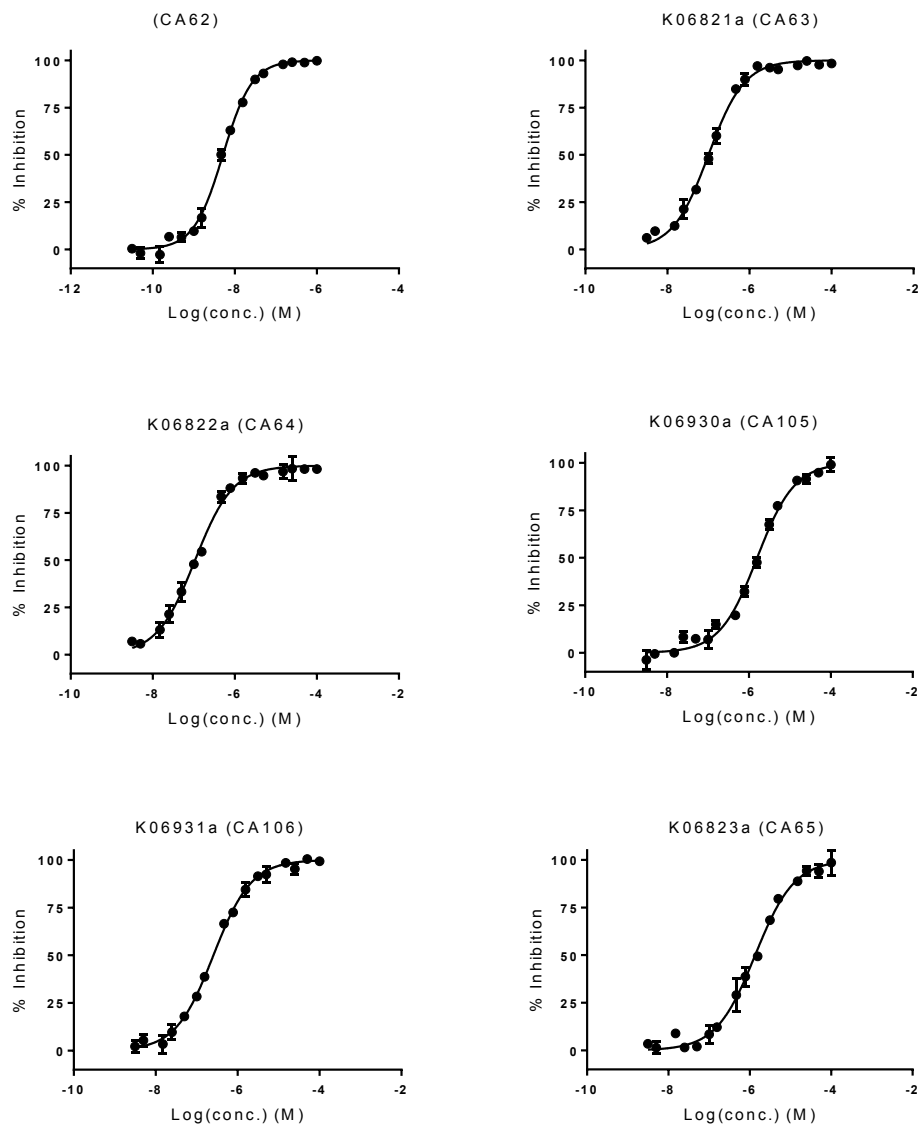

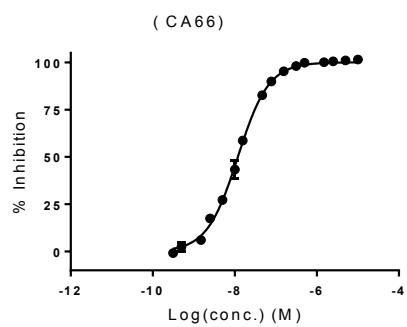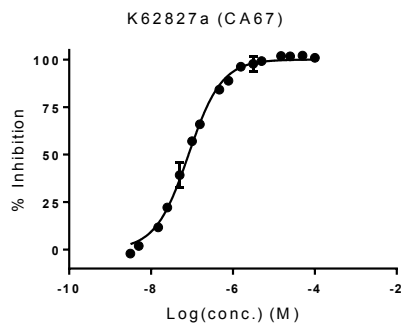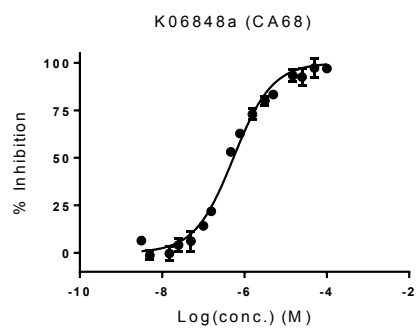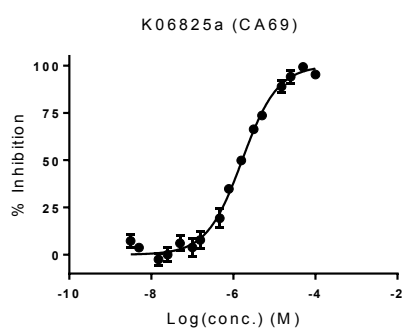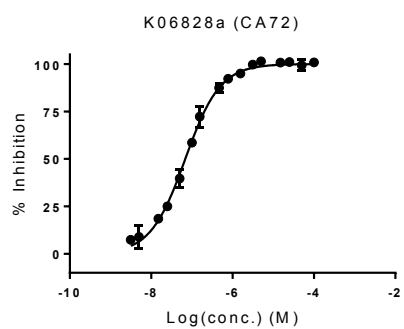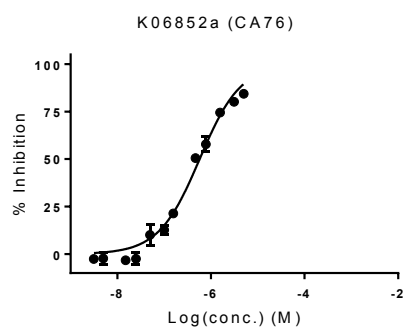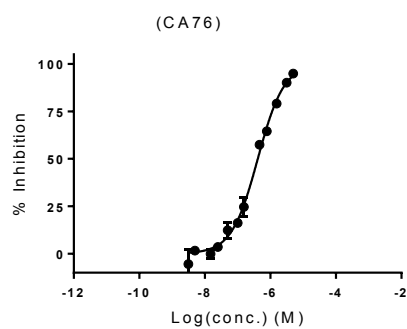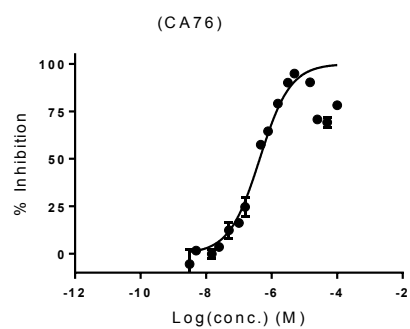

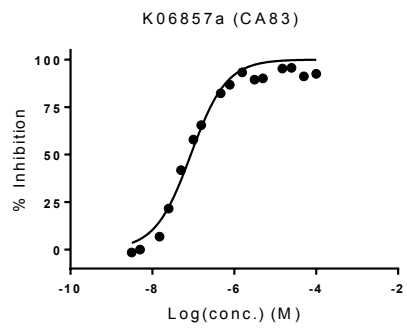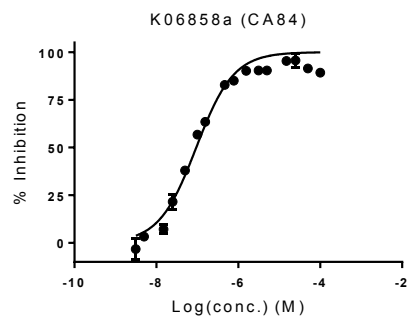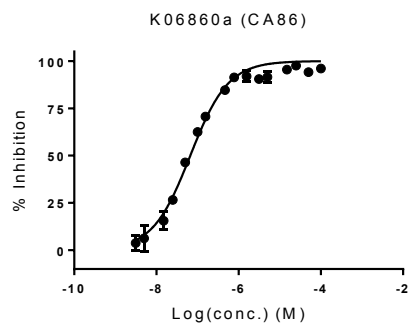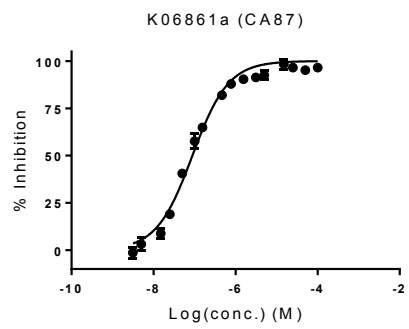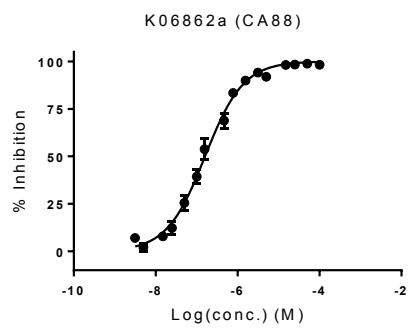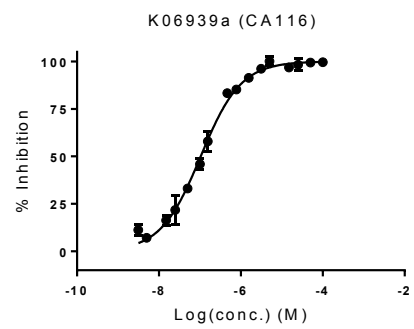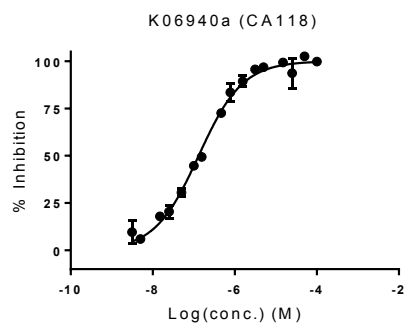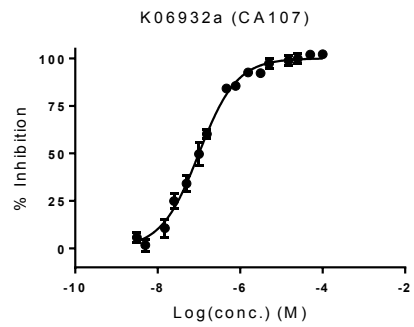

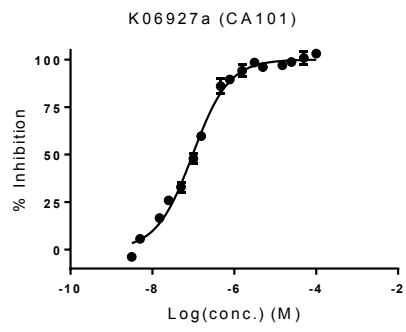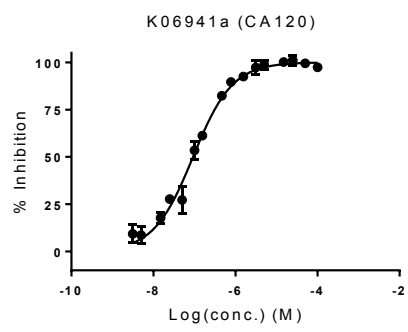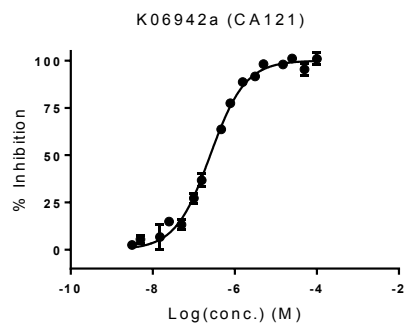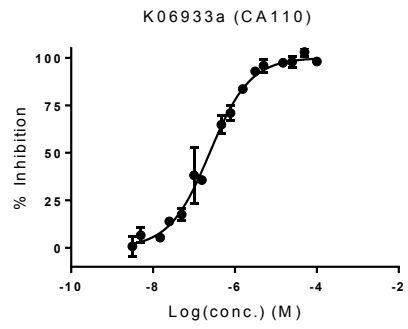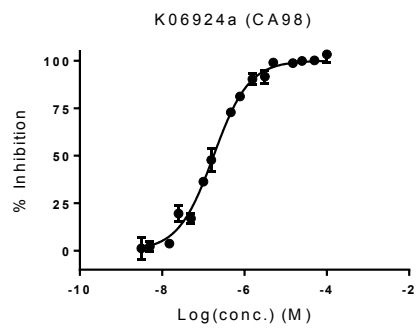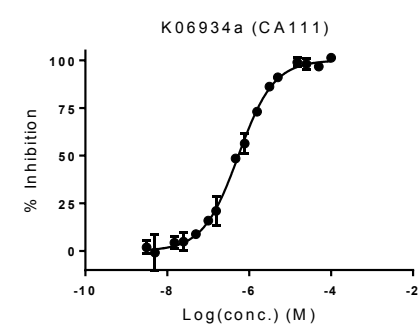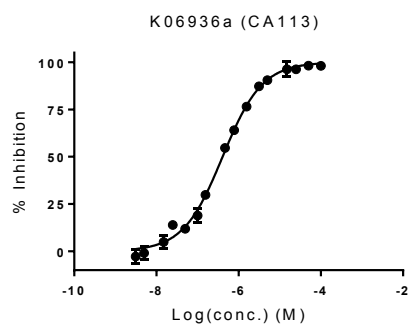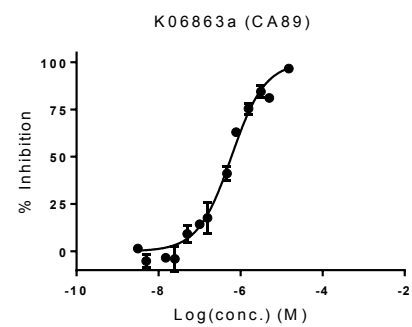



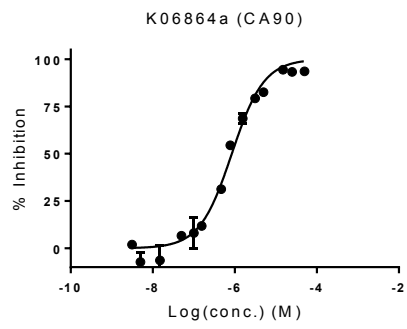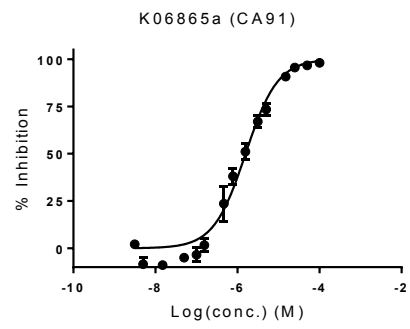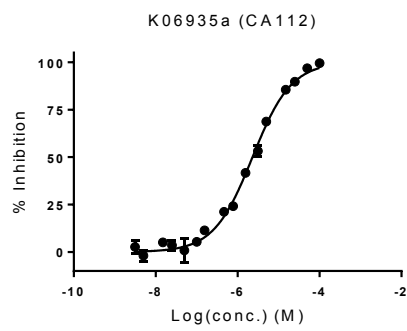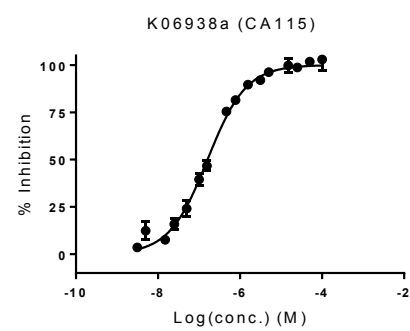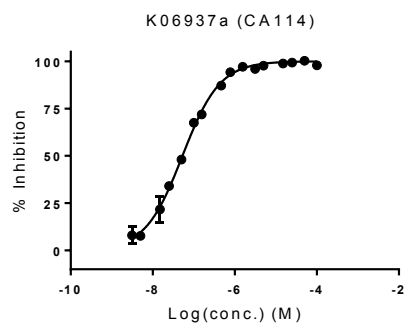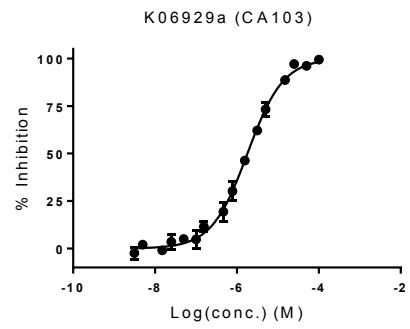

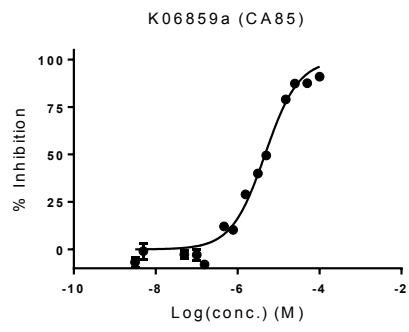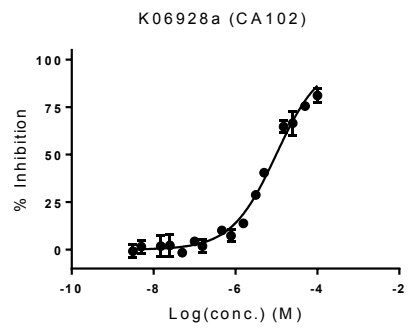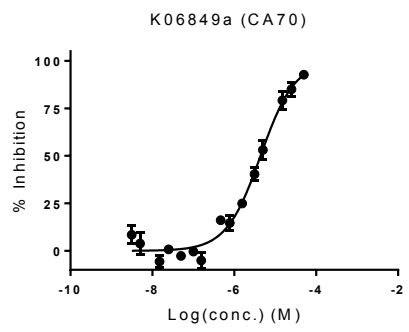

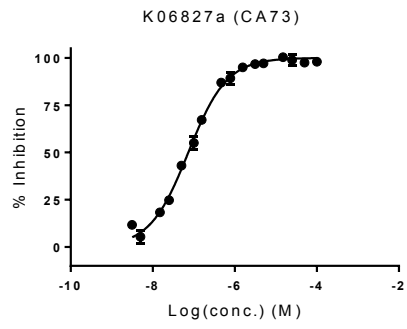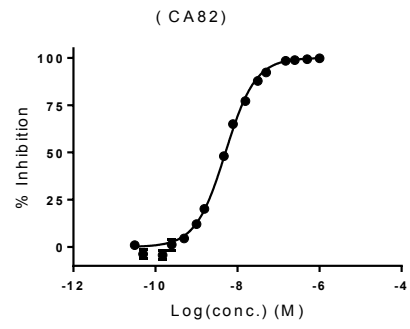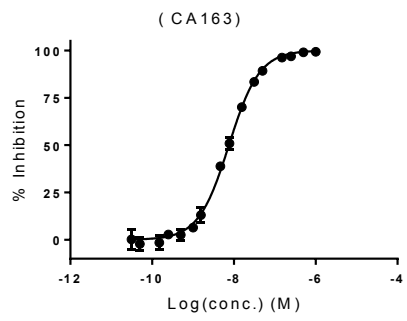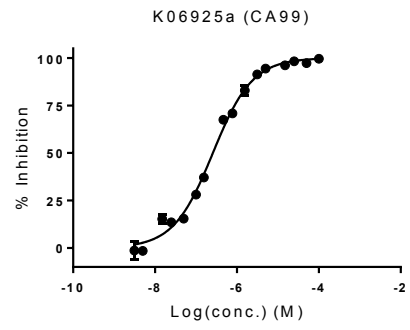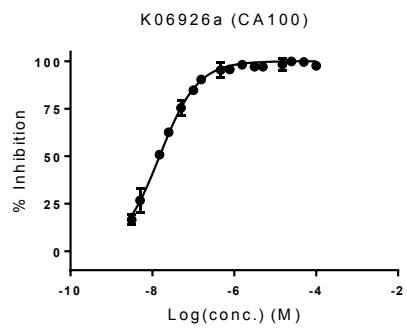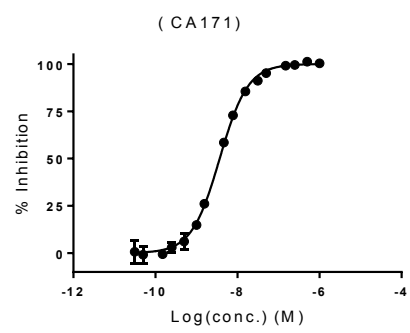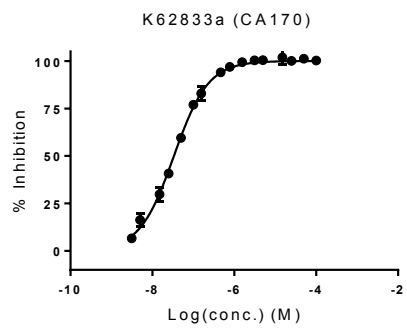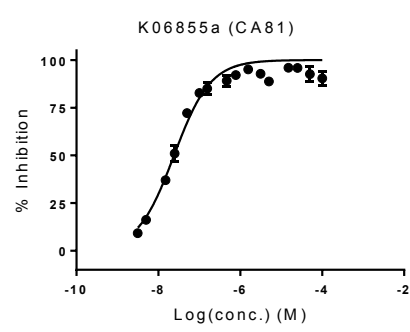

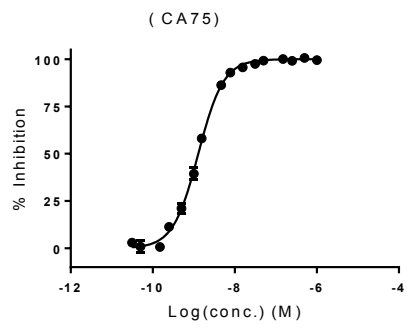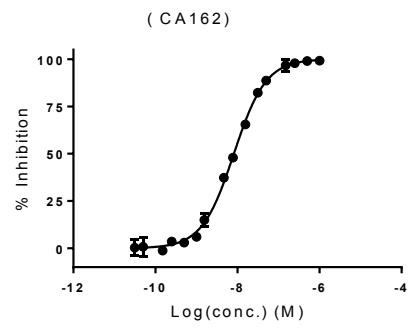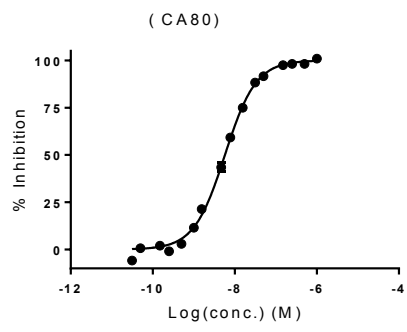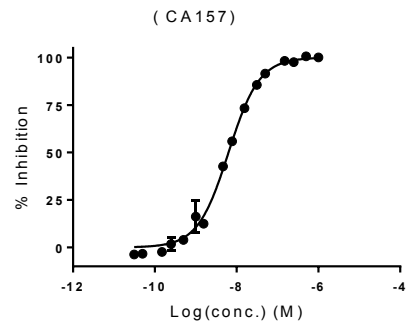

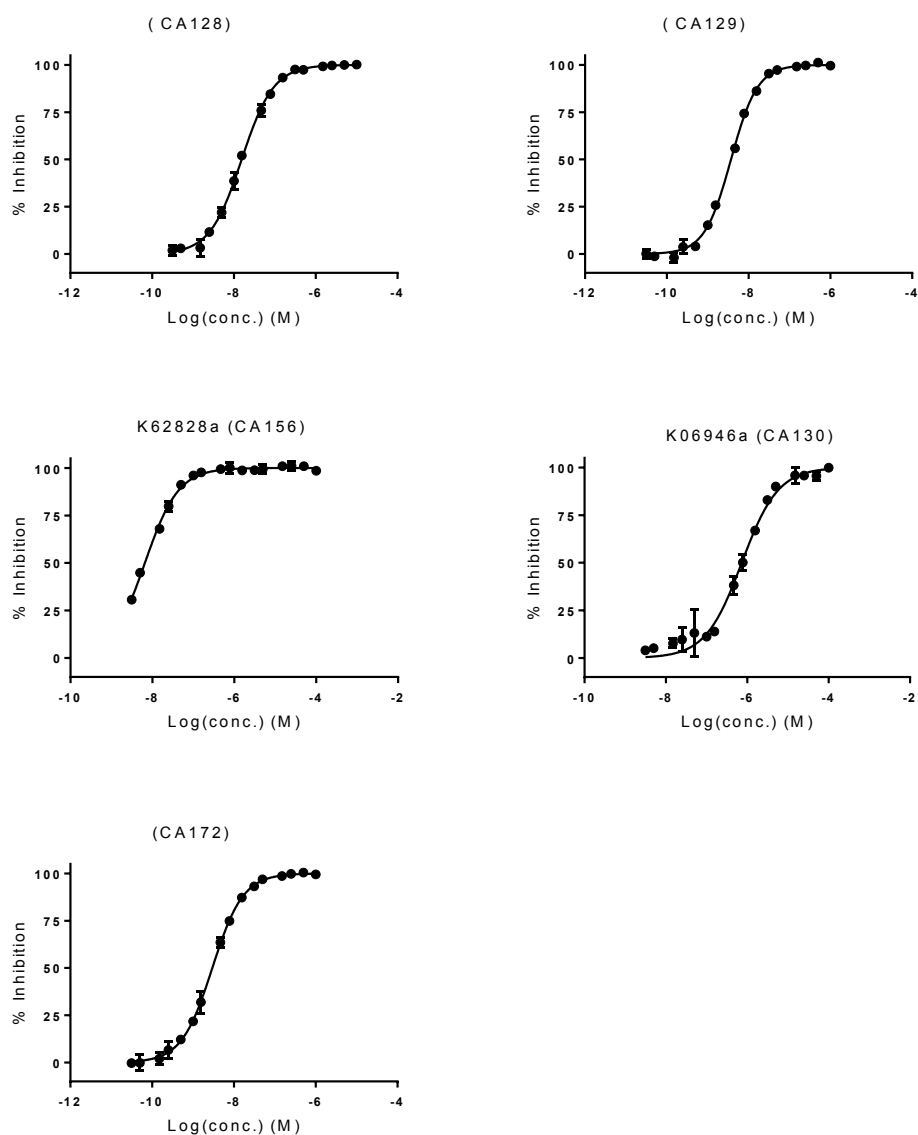

**Table S4** - Hill slopes for GAK  $K_i$  measurement in ligand binding displacement assay

| Paper | Lab-book | Annotation      | Hill Slope |
|-------|----------|-----------------|------------|
| 1     | CA62     | 3,4,5-OMe       | 1.03       |
| 2     | -        | <b>GW494610</b> | 1.18       |
| 3     | -        | <b>GI230329</b> | 1.10       |
| 4     | CA63     | 3,5-OMe         | 1.00       |
| 5     | CA64     | 3,4-OMe         | 0.93       |
| 6     | CA105    | 2,4-OMe         | 0.95       |
| 7     | CA106    | 2,5-OMe         | 0.94       |
| 8     | CA65     | 4-OMe           | 0.90       |
| 9     | CA66     | 3-OMe           | 0.93       |

|    |       |                                                   |      |
|----|-------|---------------------------------------------------|------|
| 10 | CA67  | 2-OMe                                             | 1.07 |
| 11 | CA68  | 3,4-OCH <sub>2</sub> O-                           | 0.92 |
| 12 | CA69  | 3,4-OCH <sub>2</sub> CH <sub>2</sub> O-           | 1.00 |
| 13 | CA72  | 3,4,5-OMe-Q                                       | 1.02 |
| 14 | CA76  | 3,5-OMe-Q                                         | 0.99 |
| 15 | CA78  | 4-OMe-Q                                           | 1.12 |
| 16 | CA83  | 3,4,5-F                                           | 1.00 |
| 17 | CA84  | 3,5-F                                             | 0.95 |
| 18 | CA86  | 4-F                                               | 0.94 |
| 19 | CA87  | 3-F                                               | 0.99 |
| 20 | CA88  | 2-F                                               | 0.93 |
| 21 | CA116 | 3-F, 4-Cl                                         | 0.89 |
| 22 | CA118 | 3-F, 5-Cl                                         | 0.81 |
| 23 | CA107 | 3,4-Cl                                            | 0.95 |
| 24 | CA101 | 4-Cl                                              | 0.98 |
| 25 | CA120 | 3-Cl                                              | 0.90 |
| 26 | CA121 | 2-Cl                                              | 1.02 |
| 27 | CA110 | 4-Br                                              | 0.88 |
| 28 | CA98  | 3-Br                                              | 1.01 |
| 29 | CA111 | 2-Br                                              | 1.00 |
| 30 | CA113 | 3-I                                               | 0.90 |
| 31 | CA89  | 4-CN                                              | 1.06 |
| 32 | CA90  | 3-CN                                              | 1.11 |
| 33 | CA91  | 2-CN                                              | 1.11 |
| 34 | CA112 | 3-CF <sub>3</sub>                                 | 0.92 |
| 35 | CA115 | 3-C≡C                                             | 0.93 |
| 36 | CA114 | 3-Ac                                              | 0.95 |
| 37 | CA103 | 3-SO <sub>2</sub> Me                              | 0.99 |
| 38 | CA85  | 4-SO <sub>2</sub> Me                              | 1.06 |
| 39 | CA102 | 4-O <sup>t</sup> Bu                               | 0.79 |
| 40 | CA70  | 4-CH <sub>2</sub> SO <sub>2</sub> CH <sub>3</sub> | 1.04 |
| 41 | CA73  | 6-H                                               | 1.05 |
| 42 | CA82  | 6-F                                               | 0.76 |
| 43 | CA163 | 7-F                                               | 1.18 |
| 44 | CA99  | 5,7-F                                             | 0.90 |
| 45 | CA100 | 6- <sup>t</sup> Bu                                | 0.93 |
| 46 | CA171 | 6-CN                                              | 1.04 |
| 47 | CA170 | 6-SO <sub>2</sub> Me                              | 1.04 |
| 48 | CA81  | 6-OMe                                             | 0.98 |
| 49 | CA75  | 6,7-OMe                                           | 0.44 |
| 50 | CA162 | 7-OMe                                             | 1.10 |
| 51 | CA80  | 7-CF <sub>3</sub>                                 | 0.86 |
| 52 | CA157 | 7-CN                                              | 1.10 |
| 53 | CA128 | 3-Br                                              | 0.76 |
| 54 | CA129 | 3-OMe                                             | 1.02 |
| 55 | CA156 | 3-C≡C                                             | 1.06 |

|    |       |             |      |
|----|-------|-------------|------|
| 56 | CA130 | 3-Ac        | 0.97 |
| 57 | CA172 | 3,4,5-OMe-Q | 1.13 |

Figure S12 -  $K_d$  curves for compound 13 (CA72) on EGFR and GAK

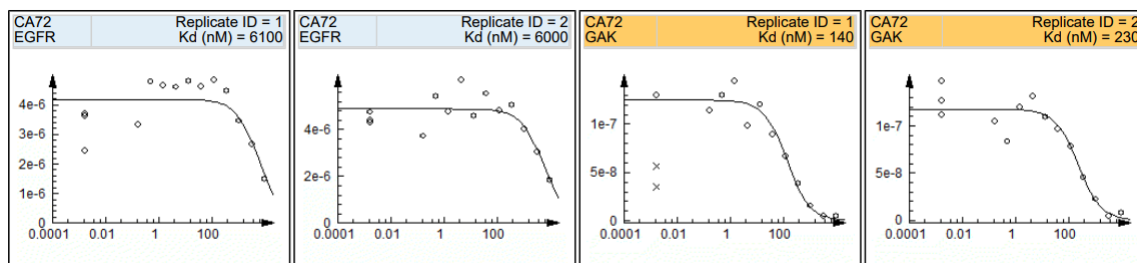

Figure S13 -  $IC_{50}$  curves for GAK

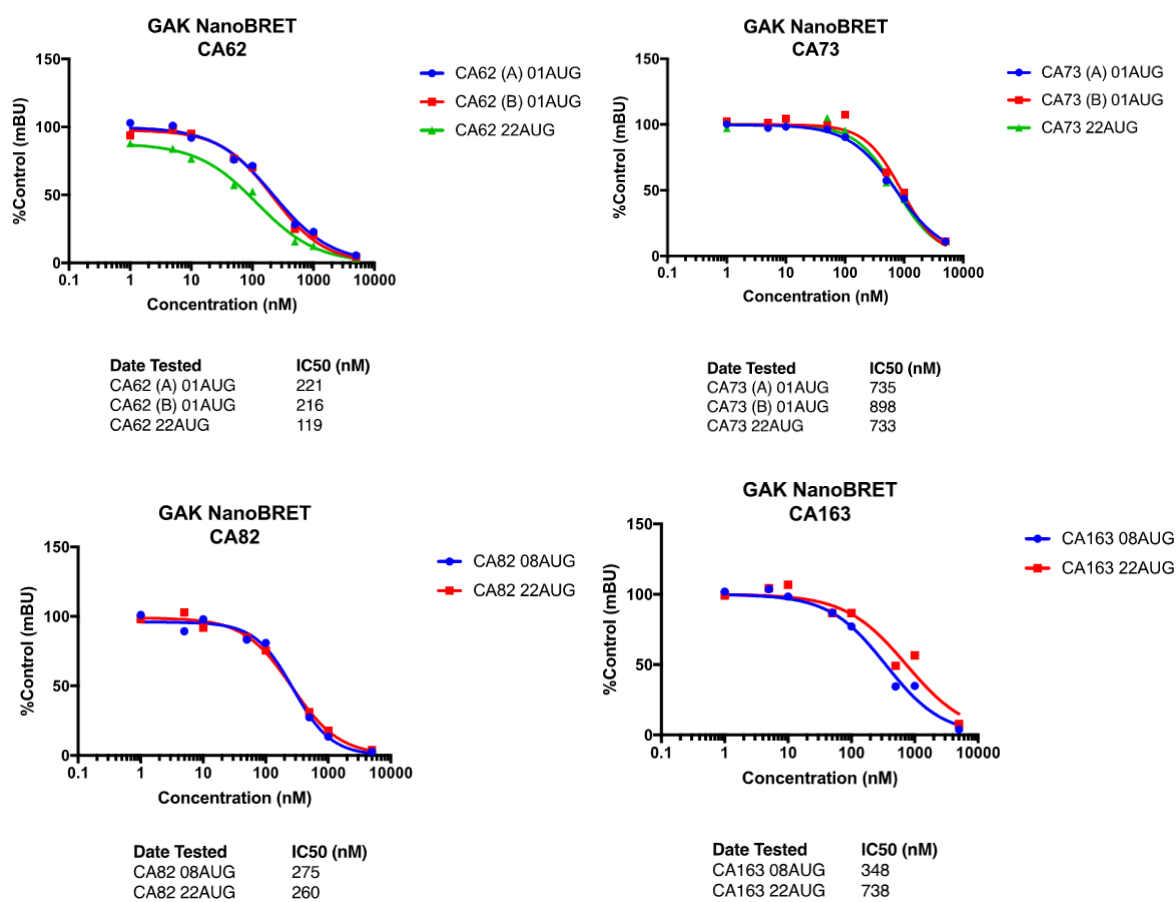

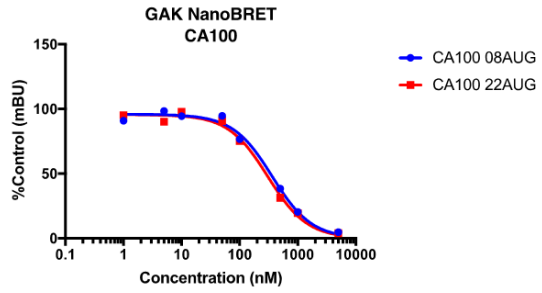

| Date Tested | IC50 (nM) |
|-------------|-----------|
| CA100 08AUG | 363       |
| CA100 22AUG | 305       |

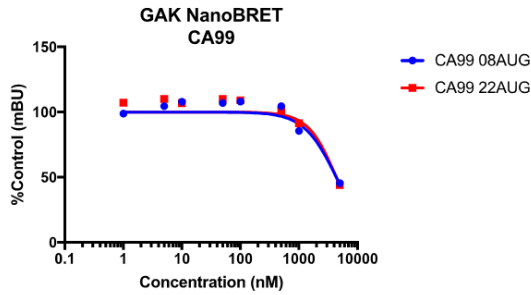

| Date Tested | IC50 (nM) |
|-------------|-----------|
| CA99 08AUG  | ~4400     |
| CA99 22AUG  | ~4400     |

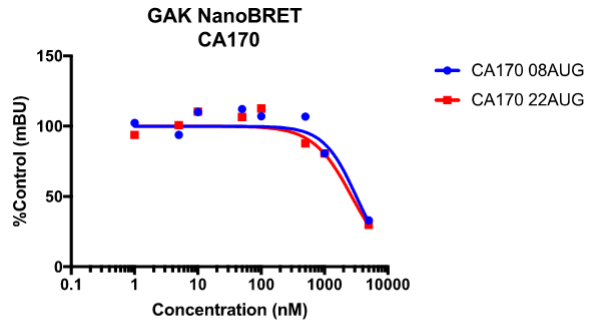

| Date Tested | IC50 (nM) |
|-------------|-----------|
| CA170 08AUG | ~3200     |
| CA170 22AUG | ~2700     |

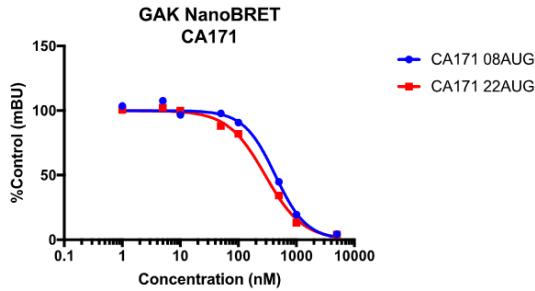

| Date Tested | IC50 (nM) |
|-------------|-----------|
| CA171 08AUG | 432       |
| CA171 22AUG | 290       |

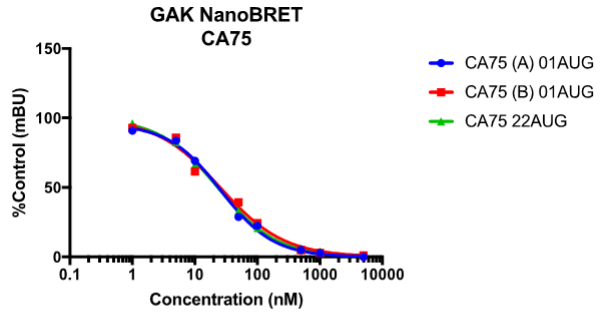

| Date Tested    | IC50 (nM) |
|----------------|-----------|
| CA75 (A) 01AUG | 26        |
| CA75 (B) 01AUG | 26        |
| CA75 22AUG     | 23        |

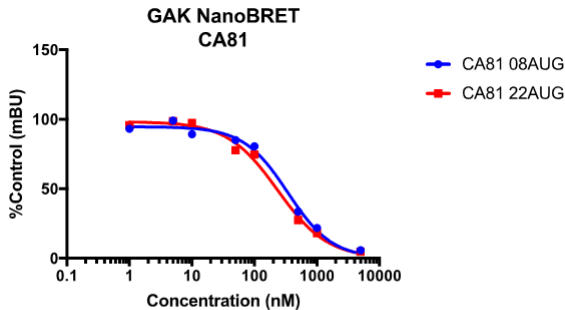

| Date Tested | IC50 (nM) |
|-------------|-----------|
| CA81 08AUG  | 342       |
| CA81 22AUG  | 234       |

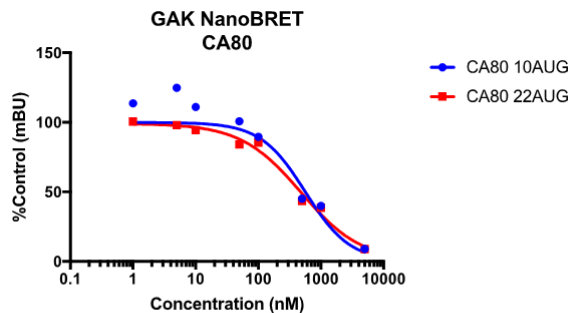

| Date Tested | IC50 (nM) |
|-------------|-----------|
| CA80 10AUG  | 564       |



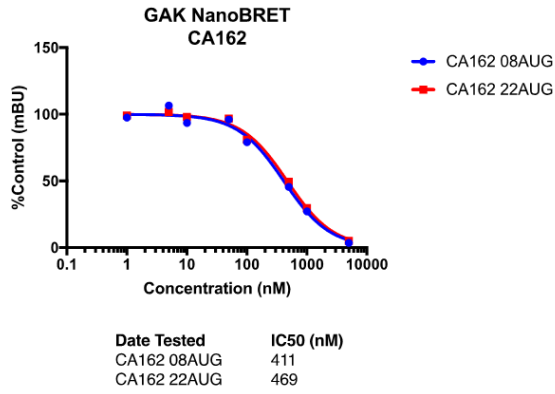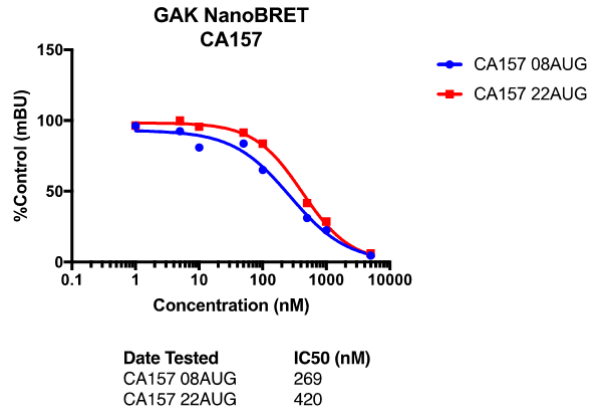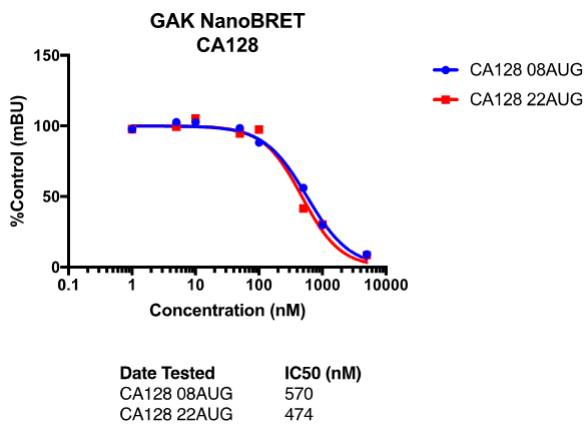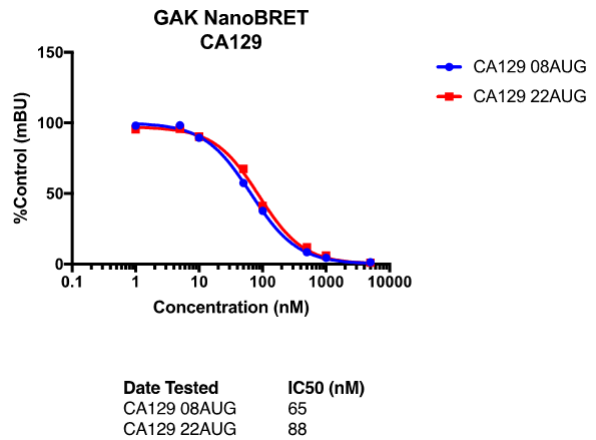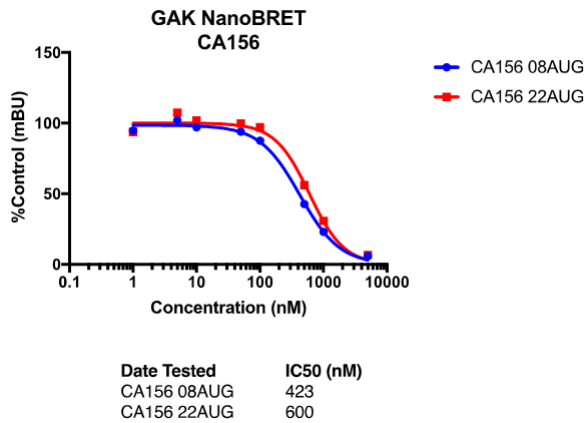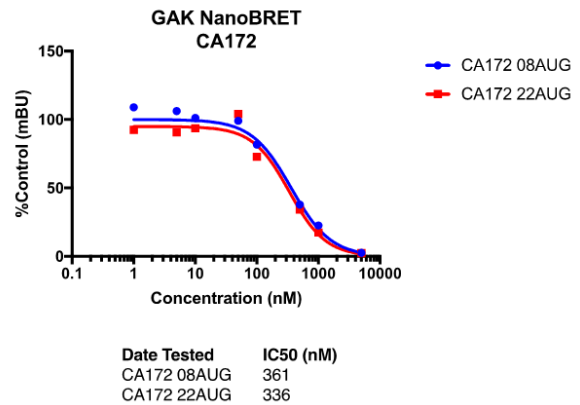

Supplement: NIHMS957779-supplement-Supporting_Information.pdf [file NIHMS957779-supplement-Supporting_Information.pdf]
